# Supplementary material for: Iterative click reactions using trivalent platforms for sequential molecular assembly
Source: Royal Society of Chemistry journal article supplement (doi:10.1039/d4cc01177e), 2024-01-01

## Supporting Information

# Iterative click reactions using trivalent platforms for sequential molecular assembly

Gaku Orimoto and Suguru Yoshida\*

*Department of Biological Science and Technology, Faculty of Advanced Engineering,  
Tokyo University of Science, 6-3-1 Niijuku, Katsushika-ku Tokyo 125-8585*

### Contents

|                                                                  |            |
|------------------------------------------------------------------|------------|
| <b>General Information</b>                                       | <b>S1</b>  |
| <b>Structures of Modules 2–4 and 7</b>                           | <b>S2</b>  |
| <b>Experimental Procedures</b>                                   | <b>S3</b>  |
| <b>Characterization Data of New Compounds</b>                    | <b>S11</b> |
| <b>HPLC Charts of Triazoles</b>                                  | <b>S26</b> |
| <b>References for Supporting Information</b>                     | <b>S27</b> |
| <b><sup>1</sup>H and <sup>13</sup>C NMR Spectra of Compounds</b> | <b>S28</b> |

### General Information

All reactions were performed with dry glassware under atmosphere of argon, unless otherwise noted. Analytical thin-layer chromatography (TLC) was performed on precoated (0.25 mm) silica-gel plates (Merck Chemicals, Silica Gel 60 F<sub>254</sub>, Cat. No. 1.05715). Column chromatography was conducted using silica-gel (Kanto Chemical Co., Inc., Silica Gel 60, spherical, particle size 40–50 μm, Cat. No. 37562-85). Melting points (Mp) were measured on an OptiMelt MPA100 (Stanford Research Systems), and are uncorrected. <sup>1</sup>H NMR spectra were obtained with a Bruker AVANCE 400 spectrometer at 400 MHz. <sup>13</sup>C NMR spectra were obtained with a Bruker AVANCE 400 spectrometer at 101 MHz. <sup>19</sup>F NMR spectra were obtained with a Bruker AVANCE 400 spectrometer at 376 MHz. All NMR measurements were carried out at 25 °C. CDCl<sub>3</sub> (Kanto Chemical Co. Inc., Cat. No. 07663-23) was used as a solvent for obtaining NMR spectra. Chemical shifts (δ) are given in parts per million (ppm) downfield from tetramethylsilane (δ 0.00 for <sup>1</sup>H NMR) or the solvent peak (δ 77.2 for <sup>13</sup>C NMR in CDCl<sub>3</sub>) as an internal reference with coupling constants (*J*) in hertz (Hz). The abbreviations s, d, t, q, m, and br signify singlet, doublet, triplet, quartet, multiplet, and broad, respectively. The abbreviations s, d, q, and m signify singlet, doublet, quartet, and multiplet respectively. IR spectra were measured on a Shimadzu IRSpirit spectrometer with the absorption band given in cm<sup>-1</sup>. High-performance liquid chromatography (HPLC) was performed on a Shimadzu Prominence HPLC system (CBM-20A lite, LC-20AD × 2, DGU-20A3R, SUS316L, and CTO-20A) equipped with a Shimadzu SPD-20A UV/Vis detector. High-resolution mass spectra (HRMS) were measured on a JEOL JMS-T100CS “AccuTOF CS” mass spectrometer under positive electrospray ionization (ESI<sup>+</sup>) conditions or JMS-700 (JEOL, Tokyo, Japan) mass spectrometer under electron impact ionization (EI) conditions.

Unless otherwise noted, materials obtained from commercial suppliers were used without further purification. 2-Iodo-3-(propargyloxy)phenyl triflate (**3d**),<sup>S1</sup> 4-(propargyloxy)benzaldehyde (**3e**),<sup>S2</sup> 4-(propargyloxy)benzaldehyde (**3e**),<sup>S2</sup> (propargylaminocarbonyl)ferrocene (**3f**),<sup>S3</sup> 5-((3*aS*,4*S*,6*aR*)-2-oxohexahydro-1*H*-thieno[3,4-*d*]imidazol-4-yl)-*N*-(prop-2-yn-1-yl)pentanamide (**3i**),<sup>S4</sup> 5-(dimethylamino)-*N*-(2-mercaptoethyl)naphthalene-1-sulfonamide (**4d**),<sup>S5</sup> (1*α*,8*α*,9*α*)-bicyclo[6.1.0]non-4-yn-9-ylmethanol (**11**),<sup>S6</sup> 4-(tert-butyltrimethylsilyloxy)phenyl acetylene (**12a**),<sup>S7</sup> 4-hydroxy-*N*-(2-(2-(prop-2-yn-1-yloxy)ethoxy)ethyl)benzamide (**12b**),<sup>S8</sup> and tris[(1-benzyl-1*H*-1,2,3-triazol-4-yl)methyl]amine (TBTA)<sup>S9</sup> were prepared according to the reported methods.

## Structures of Modules 2–4 and 7

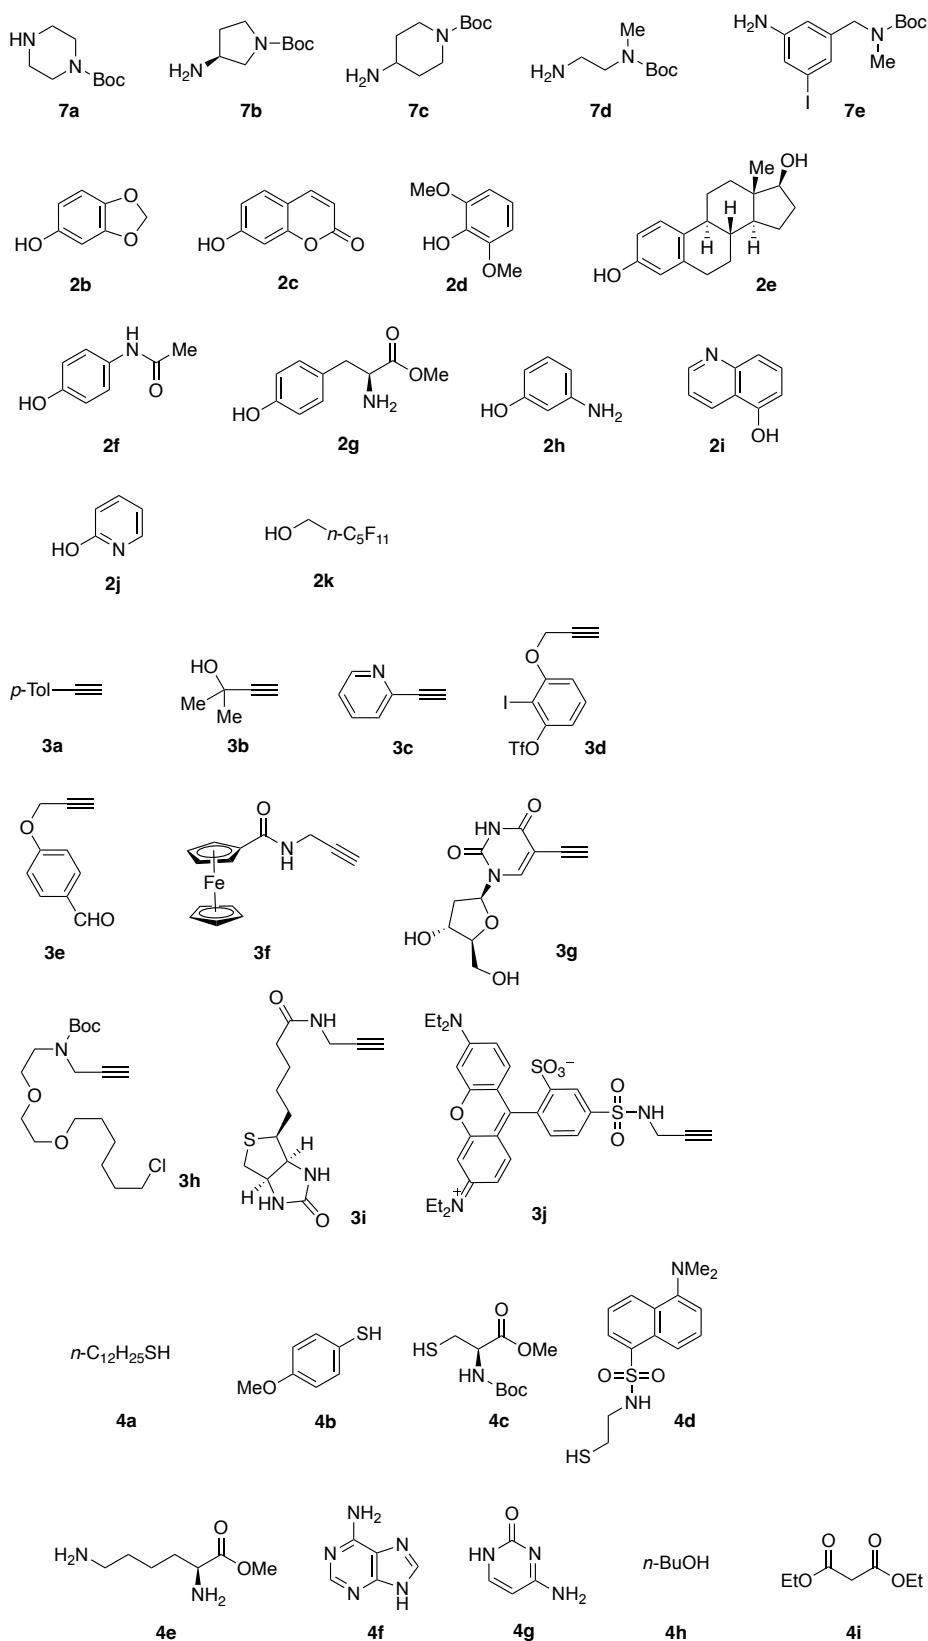

## Experimental Procedures

### Synthesis of *tert*-butyl 4-(2-azidoacryloyl)piperazine-1-carboxylate

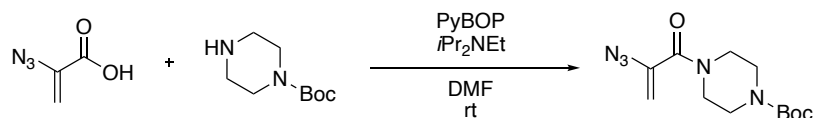

To a solution of 2-azidoacrylic acid (33.9 mg, 0.300 mmol) and *tert*-butyl piperazine-1-carboxylate (83.8 mg, 0.450 mmol) dissolved in DMF (1.5 mL) was added *i*-Pr<sub>2</sub>NEt (93.1 mg, 0.720 mmol) and (benzotriazol-1-yloxy)(trispyrrolidino)phosphonium hexafluorophosphate (PyBOP) (18.7 mg, 0.360 mmol) at 0 °C. After warming to room temperature, the mixture was stirred for 14 h at the same temperature. Then, to the mixture was added saturated aqueous sodium bicarbonate (10 mL). The mixture was extracted with EtOAc (15 mL × 3). The combined organic extract was washed with brine (10 mL) and dried with Na<sub>2</sub>SO<sub>4</sub>. After filtration, the filtrate was concentrated under reduced pressure. The residue was purified by flash column chromatography (silica-gel 10 g, *n*-hexane/EtOAc = 2/1) to give *tert*-butyl 4-(2-azidoacryloyl)piperazine-1-carboxylate (54.1 mg, 0.192 mmol, 64%) as a colorless solid.

According to the procedure for preparing *tert*-butyl 4-(2-azidoacryloyl)piperazine-1-carboxylate, *tert*-butyl (*S*)-3-aminopyrrolidine-1-carboxylate, *tert*-butyl 4-(2-azidoacrylamido)piperidine-1-carboxylate, and *tert*-butyl (2-(2-azidoacrylamido)ethyl)(methyl)carbamate were prepared from 2-azidoacrylic acid and the corresponding amines.

### Synthesis of *tert*-butyl (3-(2-azidoacrylamido)-5-iodobenzyl)(methyl)carbamate

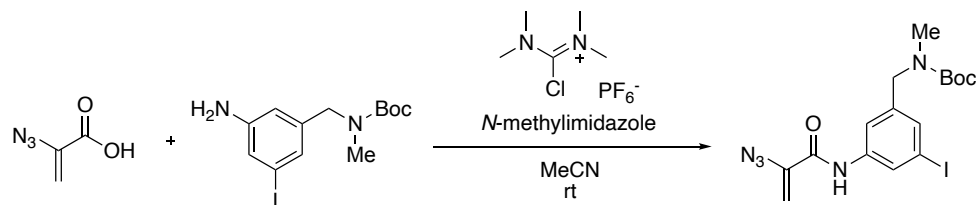

To a solution of 2-azidoacrylic acid (11.3 mg, 0.100 mmol) and *tert*-butyl (3-amino-5-iodobenzyl)(methyl)carbamate (60.0 mg, 0.130 mmol) dissolved in MeCN (600 μL) were added *N*-methylimidazole (28.7 mg, 0.350 mmol) and chloro-*N,N,N',N'*-tetramethylformamidinium hexafluorophosphate (33.7 mg, 0.120 mmol) at 0 °C. After warming to room temperature, the mixture was stirred for 14 h at the same temperature. Then, to the mixture was added saturated aqueous sodium bicarbonate (2 mL). The mixture was extracted with EtOAc (5 mL × 3). The combined organic extract was washed with brine (2 mL) and dried with Na<sub>2</sub>SO<sub>4</sub>. After filtration, the filtrate was concentrated under reduced pressure. The residue was purified by flash column chromatography (silica-gel 3 g, *n*-hexane/EtOAc = 1/1) to give *tert*-butyl (3-(2-azidoacrylamido)-5-iodobenzyl)(methyl)carbamate (28.3 mg, 62.0 μmol, 62%) as a pale yellow oil.

### Synthesis of 2-azido-1-(piperazin-1-yl)prop-2-en-1-one

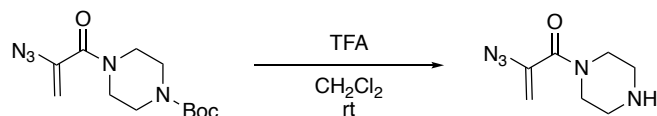

To a solution of *tert*-butyl 4-(2-azidoacryloyl)piperazine-1-carboxylate (0.281 g, 1.00 mmol) in CH<sub>2</sub>Cl<sub>2</sub> (10 mL) was slowly added trifluoroacetic acid (2.0 mL, 26.1 mmol) at 0 °C. After stirring for 2.5 h at room temperature, to the mixture was added saturated 1 M aqueous NaOH (40 mL). The mixture was extracted with CH<sub>2</sub>Cl<sub>2</sub> (100 mL × 3). The combined organic extract was washed with brine (20 mL), and dried with Na<sub>2</sub>SO<sub>4</sub>. After filtration, the filtrate was concentrated under reduced pressure to give 2-azido-1-(piperazin-1-yl)prop-2-en-1-one (0.161 g, 0.887 mmol, 89%) as a colorless oil.

According to the procedure for preparing 2-azido-1-(piperazin-1-yl)prop-2-en-1-one, (*S*)-2-azido-*N*-(pyrrolidin-3-yl)acrylamide, 2-azido-*N*-(piperidin-4-yl)acrylamide, 2-azido-*N*-(2-

(methylamino)ethyl)acrylamide, and 2-azido-*N*-(3-iodo-5-((methylamino)methyl)phenyl)acrylamide were prepared from the corresponding 2-azidoacrylamides.

#### Synthesis of 2-(4-(2-azidoacryloyl)piperazin-1-yl)ethane-1-sulfonyl fluoride (**1a**)

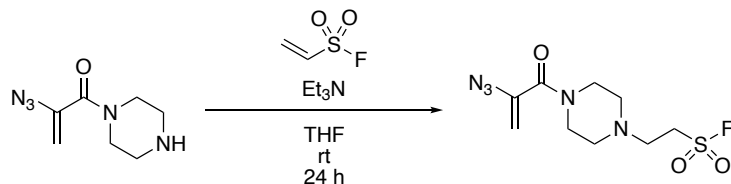

To a solution of 2-azido-1-(piperazin-1-yl)prop-2-en-1-one (1.34 g, 7.40 mmol) in THF (32.0 mL) was added ethenesulfonyl fluoride (0.736 mL, 8.9 mmol) and triethylamine (1.23 mL, 8.88 mmol) at room temperature. After stirring for 24 h at the same temperature, the mixture was concentrated under reduced pressure. The residue was purified by flash column chromatography (silica-gel 80 g, CH<sub>2</sub>Cl<sub>2</sub>/MeOH = 30/1) to give 2-(4-(2-azidoacryloyl)piperazin-1-yl)ethane-1-sulfonyl fluoride (**1a**) (1.73 g, 5.94 mmol, 80%) as a colorless solid.

According to the procedure for preparing 2-(4-(2-azidoacryloyl)piperazin-1-yl)ethane-1-sulfonyl fluoride (**1a**), (*S*)-2-(3-(2-azidoacrylamido)pyrrolidin-1-yl)ethane-1-sulfonyl fluoride (**1b**), 2-(4-(2-azidoacrylamido)piperidin-1-yl)ethane-1-sulfonyl fluoride (**1c**), 2-((2-(2-azidoacrylamido)ethyl)(methylamino)ethane-1-sulfonyl fluoride (**1d**), and 2-((3-(2-azidoacrylamido)-5-iodobenzyl)(methylamino)ethane-1-sulfonyl fluoride (**1e**) were prepared from the corresponding 2-azidoacrylamides.

#### A typical procedure for the SuFEx reaction of **1a** with alcohols

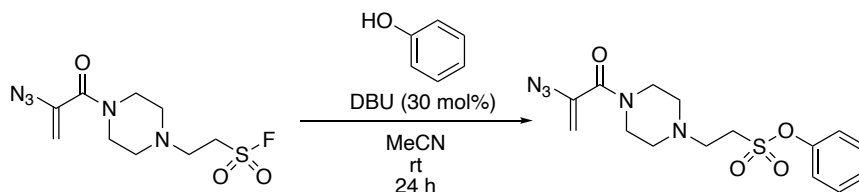

To a solution of 2-(4-(2-azidoacryloyl)piperazin-1-yl)ethane-1-sulfonyl fluoride (**1a**) (14.6 mg, 50 μmol) in acetonitrile (500 μL) was added phenol (5.6 mg, 60 μmol) and DBU (2.3 μL, 15 μmol) at room temperature. After stirring for 24 h at the same temperature, to the mixture was added water (10 mL). The mixture was extracted with CH<sub>2</sub>Cl<sub>2</sub> (10 mL × 3). The combined organic extract was washed with aq. sat. K<sub>2</sub>CO<sub>3</sub> (10 mL) and brine (20 mL) and dried with Na<sub>2</sub>SO<sub>4</sub>. After filtration, the filtrate was concentrated under reduced pressure. The residue was purified by preparative TLC (CH<sub>2</sub>Cl<sub>2</sub>/MeOH = 30/1) to give phenyl 2-(4-(2-azidoacryloyl)piperazin-1-yl)ethane-1-sulfonate (**9a**) (16.8 mg, 46.0 μmol, quant.) as a pale yellow oil.

According to the procedure for preparing phenyl 2-(4-(2-azidoacryloyl)piperazin-1-yl)ethane-1-sulfonate (**9a**), benzo[*d*][1,3]dioxol-5-yl 2-(4-(2-azidoacryloyl)piperazin-1-yl)ethane-1-sulfonate (**9b**), 2-oxo-2*H*-chromen-7-yl 2-(4-(2-azidoacryloyl)piperazin-1-yl)ethane-1-sulfonate (**9c**), 2,6-dimethoxyphenyl 2-(4-(2-azidoacryloyl)piperazin-1-yl)ethane-1-sulfonate (**9d**), (8*R*,9*S*,13*S*,14*S*)-17-hydroxy-13-methyl-7,8,9,11,12,13,14,15,16,17-decahydro-6*H*-cyclopenta[*a*]phenanthren-3-yl 2-(4-(2-azidoacryloyl)piperazin-1-yl)ethane-1-sulfonate (**9e**), 4-acetamidophenyl 2-(4-(2-azidoacryloyl)piperazin-1-yl)ethane-1-sulfonate (**9f**), methyl (*S*)-2-amino-3-(4-(((2-(4-(2-azidoacryloyl)piperazin-1-yl)ethyl)sulfonyl)oxy)phenyl)propanoate (**9g**), 3-aminophenyl 2-(4-(2-azidoacryloyl)piperazin-1-yl)ethane-1-sulfonate (**9h**), quinolin-5-yl 2-(4-(2-azidoacryloyl)piperazin-1-yl)ethane-1-sulfonate (**9i**), and pyridin-2-yl 2-(4-(2-azidoacryloyl)piperazin-1-yl)ethane-1-sulfonate (**9j**) were prepared from **1a** and the corresponding alcohols.

Synthesis of 2,2,3,3,4,4,5,5,6,6,6-undecafluorohexyl 2-(4-(2-azidoacryloyl)piperazin-1-yl)ethane-1-sulfonate (**9k**)

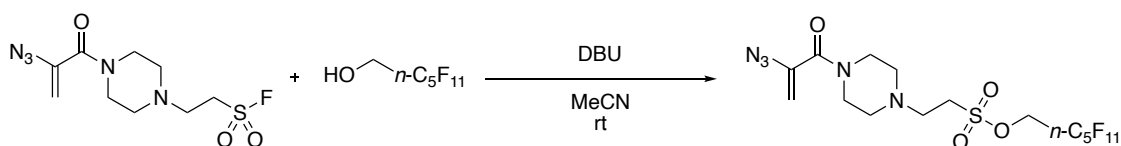

To a solution of 2-(4-(2-azidoacryloyl)piperazin-1-yl)ethane-1-sulfonyl fluoride (**1a**) (14.6 mg, 50  $\mu$ mol) in acetonitrile (500  $\mu$ L) was added 2,2,3,3,4,4,5,5,6,6,6-undecafluorohexan-1-ol (18.0 mg, 60  $\mu$ mol) and DBU (9.1  $\mu$ L, 60  $\mu$ mol) at room temperature. After stirring for 24 h at the same temperature, the mixture was concentrated under reduced pressure. The residue was purified by preparative TLC ( $\text{CH}_2\text{Cl}_2/\text{MeOH} = 10/1$ ) to give 2,2,3,3,4,4,5,5,6,6,6-undecafluorohexyl 2-(4-(2-azidoacryloyl)piperazin-1-yl)ethane-1-sulfonate (**9k**) (26.8 mg, 47.0  $\mu$ mol, 94%) as a pale yellow solid.

A typical procedure for the CuAAC reaction of **9a** with alkynes

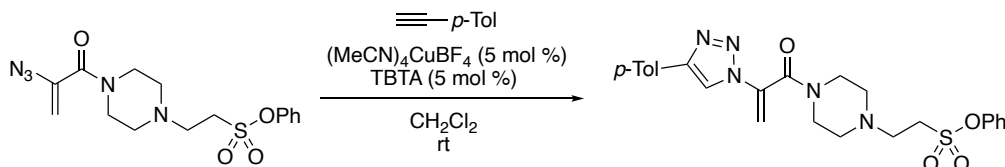

To a solution of phenyl 2-(4-(2-azidoacryloyl)piperazin-1-yl)ethane-1-sulfonate (**9a**) (36.5 mg, 0.100 mmol) in  $\text{CH}_2\text{Cl}_2$  (6.0 mL) were added *p*-ethynyltoluene (17.0  $\mu$ L, 0.150 mmol),  $(\text{MeCN})_4\text{CuBF}_4$  (1.6 mg, 5.0  $\mu$ mol), and tris(benzyltriazolylmethyl)amine (TBTA) (2.6 mg, 5.0  $\mu$ mol) at room temperature. After stirring for 24 h at the same temperature, to the mixture was added water (10 mL). The mixture was extracted with  $\text{CH}_2\text{Cl}_2$  (20 mL  $\times$  2). The combined organic extract was washed with brine (10 mL) and dried with  $\text{Na}_2\text{SO}_4$ . After filtration, the filtrate was concentrated under reduced pressure. The residue was purified by preparative TLC ( $\text{CH}_2\text{Cl}_2/\text{MeOH} = 15/1$ ) to give phenyl 2-(4-(2-(4-(4-tolyl)-1H-1,2,3-triazol-1-yl)acryloyl)piperazin-1-yl)ethane-1-sulfonate (**10a**) (39.2 mg, 0.100 mmol, quant.) as a colorless oil.

According to the procedure for preparing phenyl 2-(4-(2-(4-(4-tolyl)-1H-1,2,3-triazol-1-yl)acryloyl)piperazin-1-yl)ethane-1-sulfonate (**10a**), triazoles **10b–10j** were prepared from **9a** and the corresponding alkynes.

Synthesis of phenyl 2-(4-(2-((5aR,6R,6aS)-6-(hydroxymethyl)-5,5a,6,6a,7,8-hexahydrocyclopropa[5,6]cycloocta[1,2-d][1,2,3]triazol-1(4H)-yl)acryloyl)piperazin-1-yl)ethane-1-sulfonate (**10k**)

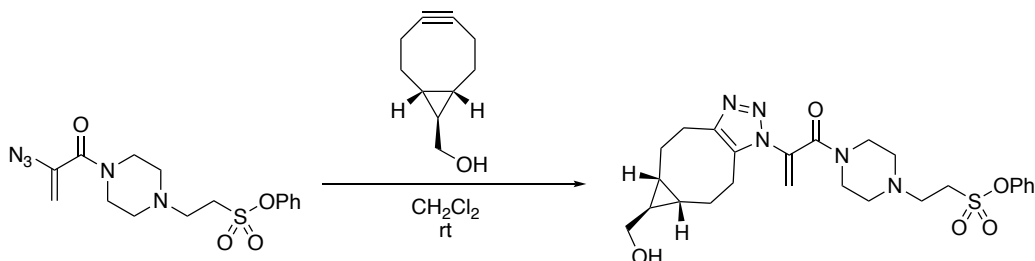

To a solution of phenyl 2-(4-(2-azidoacryloyl)piperazin-1-yl)ethane-1-sulfonate (**9a**) (18.2 mg, 50.0  $\mu$ mol) in  $\text{CH}_2\text{Cl}_2$  (1.0 mL) was added ((1R,8S,9r)-bicyclo[6.1.0]non-4-yn-9-yl)methanol (**11**) (12.3 mg, 60.0  $\mu$ mol) at room temperature. After stirring for 24 h at the same temperature, the mixture was concentrated under reduced pressure. The residue was purified by preparative TLC (*n*-hexane/EtOAc = 1/1) to give phenyl 2-(4-(2-((5aR,6R,6aS)-6-(hydroxymethyl)-5,5a,6,6a,7,8-hexahydrocyclopropa[5,6]cycloocta[1,2-d][1,2,3]triazol-1(4H)-yl)acryloyl)piperazin-1-yl)ethane-1-sulfonate (**10k**) (25.2 mg, 42.0  $\mu$ mol, 84%) as a colorless solid.

A typical procedure for the Michael addition of thiols to **10a**

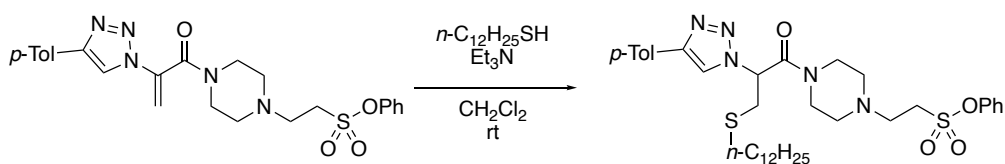

In a 0.3 mL screw-top V-vial<sup>®</sup> with a solid-top cap (Sigma-Aldrich, Cat. No. Z115118), to a solution of phenyl 2-(4-(2-(4-(4-tolyl)-1H-1,2,3-triazol-1-yl)acryloyl)piperazin-1-yl)ethane-1-sulfonate (**10a**) (24.1 mg, 50.0  $\mu\text{mol}$ ) in  $\text{CH}_2\text{Cl}_2$  (0.20 mL) were added triethylamine (8.4  $\mu\text{L}$ , 60  $\mu\text{mol}$ ) and dodecanethiol (14.3  $\mu\text{L}$ , 60.0  $\mu\text{mol}$ ) at 0 °C. After stirring for 24 h at room temperature, the mixture was concentrated under reduced pressure. The resulting residue was purified by preparative TLC ( $\text{CH}_2\text{Cl}_2/\text{MeOH} = 20/1$ ) to give phenyl 2-(4-(3-(dodecylthio)-2-(4-(4-tolyl)-1H-1,2,3-triazol-1-yl)propanoyl)piperazin-1-yl)ethane-1-sulfonate (**5a**) (29.9 mg, 43.8  $\mu\text{mol}$ , 88%) as a colorless oil.

According to the procedure for preparing triazole **5a**, triazoles **5b–5d** were prepared from **10a** and the corresponding thiols.

A typical procedure for the Michael addition of amines to **10a**

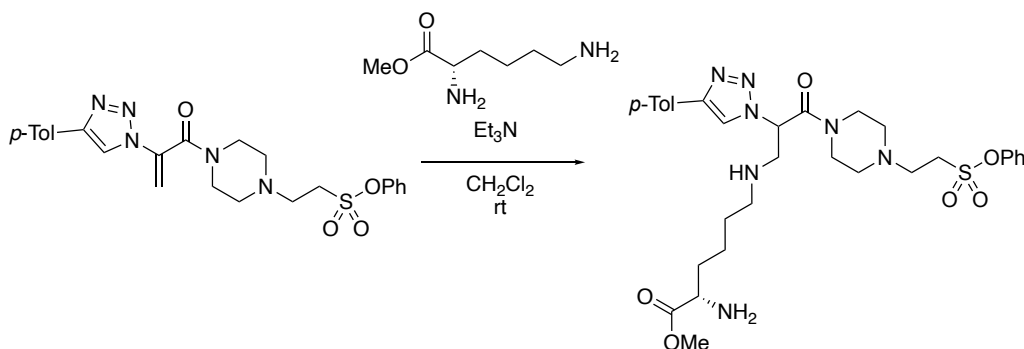

In a 0.3 mL screw-top V-vial<sup>®</sup> with a solid-top cap (Sigma-Aldrich, Cat. No. Z115118), to a solution of phenyl 2-(4-(2-(4-(4-tolyl)-1H-1,2,3-triazol-1-yl)acryloyl)piperazin-1-yl)ethane-1-sulfonate (**10a**) (24.1 mg, 50.0  $\mu\text{mol}$ ) in  $\text{CH}_2\text{Cl}_2$  (0.20 mL) were added triethylamine (8.4  $\mu\text{L}$ , 60  $\mu\text{mol}$ ) and methyl L-lysinate (18.5 mg, 60.0  $\mu\text{mol}$ ) at 0 °C. After stirring for 24 h at room temperature, the mixture was concentrated under reduced pressure. The resulting residue was purified by preparative TLC ( $\text{CH}_2\text{Cl}_2/\text{MeOH} = 20/1$ ) to give methyl *N*<sup>6</sup>-(3-oxo-3-(4-(2-(phenoxysulfonyl)ethyl)piperazin-1-yl)-2-(4-(*p*-tolyl)-1H-1,2,3-triazol-1-yl)propyl)-L-lysinate (**5e**) (39.5 mg, 50  $\mu\text{mol}$ , 83%) as a colorless oil.

According to the procedure for preparing triazole **5e**, triazoles **5f** and **5g** were prepared from methyl L-lysinate, 9H-purin-6-amine and 6-aminopyrazin-2(1H)-one, respectively, with **10a**.

Synthesis of phenyl 2-(4-(3-butoxy-2-(4-(*p*-tolyl)-1H-1,2,3-triazol-1-yl)propanoyl)piperazin-1-yl)ethane-1-sulfonate (**5h**)

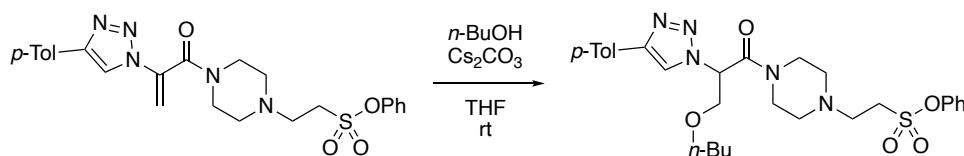

In a 0.3 mL screw-top V-vial<sup>®</sup> with a solid-top cap (Sigma-Aldrich, Cat. No. Z115118), to a solution of phenyl 2-(4-(2-(4-(4-tolyl)-1H-1,2,3-triazol-1-yl)acryloyl)piperazin-1-yl)ethane-1-sulfonate (**10a**) (19.5 mg, 50.0  $\mu\text{mol}$ ) in THF (0.20 mL) were added butanol (18.3  $\mu\text{L}$ , 0.200 mmol) and cesium carbonate (39.1 mg, 0.120 mmol) at room temperature. After stirring for 24 h at the same temperature, the mixture was concentrated under reduced

pressure. The residue was purified by preparative TLC (*n*-hexane/EtOAc = 1/1) to give phenyl 2-(4-(3-butoxy-2-(4(*p*-tolyl)-1*H*-1,2,3-triazol-1-yl)propanoyl)piperazin-1-yl)ethane-1-sulfonate (**5h**) (19.0 mg, 41.0  $\mu$ mol, 82%) as a colorless oil.

*Synthesis of diethyl 2-(3-oxo-3-(4-(2-(phenoxysulfonyl)ethyl)piperazin-1-yl)-2-(4-(p-tolyl)-1*H*-1,2,3-triazol-1-yl)propyl)malonate (5i)*

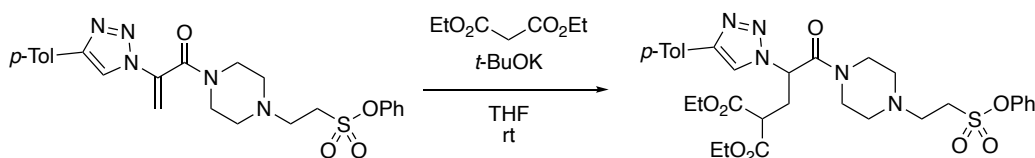

In a 0.3 mL screw-top V-vial<sup>®</sup> with a solid-top cap (Sigma-Aldrich, Cat. No. Z115118), to a mixture of phenyl 2-(4-(2-(4-(4-tolyl)-1*H*-1,2,3-triazol-1-yl)acryloyl)piperazin-1-yl)ethane-1-sulfonate (**10a**) (19.5 mg, 50.0  $\mu$ mol) and diethyl malonate (11.4  $\mu$ L, 75.0  $\mu$ mol) was added sodium *tert*-butoxide (5.6 mg, 50  $\mu$ mol) dissolved in THF (0.20 mL) at room temperature. After stirring for 24 h at the same temperature, to the mixture was added saturated aqueous ammonium chloride (5 mL). The mixture was extracted with EtOAc (20 mL  $\times$  2). The combined organic extract was washed with brine (5 mL) and dried with Na<sub>2</sub>SO<sub>4</sub>. After filtration, the filtrate was concentrated under reduced pressure. The residue was purified by preparative TLC (*n*-hexane/EtOAc = 1/1) to give diethyl 2-(3-oxo-3-(4-(2-(phenoxysulfonyl)ethyl)piperazin-1-yl)-2-(4(*p*-tolyl)-1*H*-1,2,3-triazol-1-yl)propyl)malonate (**5i**) (32.0 mg, 50.0  $\mu$ mol, quant.) as a colorless solid.

*Typical procedures for the iterative click reactions from 9a*

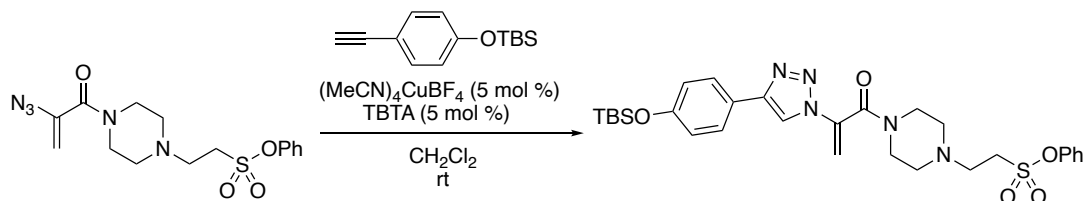

To a solution of phenyl 2-(4-(2-azidoacryloyl)piperazin-1-yl)ethane-1-sulfonate (**9a**) (18.2 mg, 50.0  $\mu$ mol) in CH<sub>2</sub>Cl<sub>2</sub> (1.0 mL) were added *tert*-butyl(4-ethynylphenoxy)dimethylsilane (**12a**) (13.9 mg, 60.0  $\mu$ mol), (MeCN)<sub>4</sub>CuBF<sub>4</sub> (1.6 mg, 2.5  $\mu$ mol), and TBTA (2.6 mg, 2.5  $\mu$ mol) at room temperature. After stirring for 24 h at the same temperature, to the mixture was added water (10 mL). The mixture was extracted with CH<sub>2</sub>Cl<sub>2</sub> (20 mL  $\times$  2). The combined organic extract was washed with brine (10 mL) and dried with Na<sub>2</sub>SO<sub>4</sub>. After filtration, the filtrate was concentrated under reduced pressure. The residue was purified by preparative TLC (CH<sub>2</sub>Cl<sub>2</sub>/MeOH = 15/1) to give phenyl 2-(4-(2-(4-(4-(*tert*-butyldimethylsilyloxy)phenyl)-1*H*-1,2,3-triazol-1-yl)acryloyl)piperazin-1-yl)ethane-1-sulfonate (**13a**) (24.5 mg, 41.0  $\mu$ mol, 82%) as a colorless oil.

According to the procedure for preparing **13a** from **12a** with **9a**, triazoles **13b** and **13c** were prepared from the corresponding alkynes **12b** and **12c**, respectively. Also, triazoles **S1** and **S2** were prepared from the corresponding azides under the same conditions. The isolated yield of **S2** was calculated from the actual weight obtained as a diastereomeric mixture after the purification.

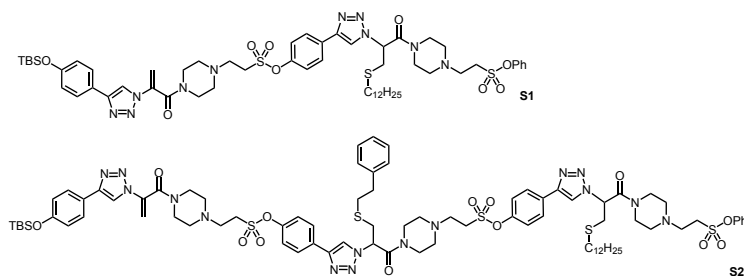

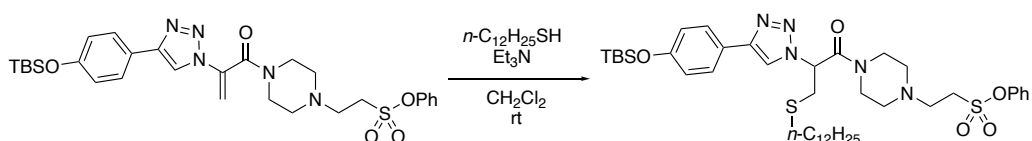

In a 0.3 mL screw-top V-vial<sup>®</sup> with a solid-top cap (Sigma-Aldrich, Cat. No. Z115118), to a solution of phenyl 2-(4-(2-(4-(4-((*tert*-butyldimethylsilyl)oxy)phenyl)-1*H*-1,2,3-triazol-1-yl)acryloyl)piperazin-1-yl)ethane-1-sulfonate (**13a**) (17.9 mg, 30.0  $\mu$ mol) in  $\text{CH}_2\text{Cl}_2$  (0.20 mL) were added triethylamine (6.0  $\mu$ L, 36  $\mu$ mol) and dodecanethiol (10.3  $\mu$ L, 36.0  $\mu$ mol) at 0 °C. After stirring for 24 h at room temperature, the mixture was concentrated under reduced pressure. The resulting residue was purified by preparative TLC ( $\text{CH}_2\text{Cl}_2/\text{MeOH} = 20/1$ ) to give phenyl 2-(4-(2-(4-(4-((*tert*-butyldimethylsilyl)oxy)phenyl)-1*H*-1,2,3-triazol-1-yl)-3-(dodecylthio)propanoyl)piperazin-1-yl)ethane-1-sulfonate (**S3**) (23.9 mg, 30.0  $\mu$ mol, quant.) as a colorless oil.

According to the procedure for preparing triazole **14** from **9a**, bis(triazole) **S2** and tris(triazole) **16** were prepared from triazole **14** and bis(triazole) **S2**, respectively, with 2-phenylethanethiol, butylamine, and 2-(4-(2-azidoacryloyl)piperazin-1-yl)ethane-1-sulfonyl fluoride (**1a**). Also, triazoles **S4** and **16** were prepared from the corresponding acrylamides under the same conditions. The isolated yields of **S4** and **16** were calculated from the actual weights obtained as diastereomeric mixtures after the purification.

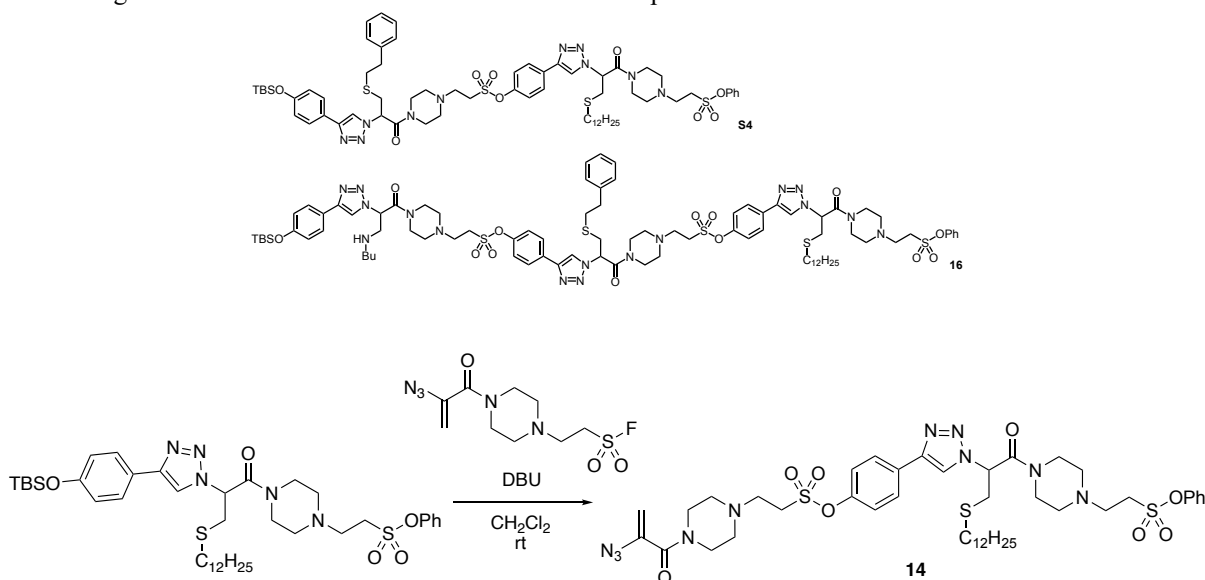

To a solution of phenyl 2-(4-(2-(4-(4-((*tert*-butyldimethylsilyl)oxy)phenyl)-1*H*-1,2,3-triazol-1-yl)-3-(dodecylthio)propanoyl)piperazin-1-yl)ethane-1-sulfonate (**S1**) (85.2 mg, 0.106 mmol) in  $\text{CH}_2\text{Cl}_2$  (800  $\mu$ L) was added 2-(4-(2-azidoacryloyl)piperazin-1-yl)ethane-1-sulfonyl fluoride (**1a**) (37.2 mg, 0.127 mmol) and DBU (19.3  $\mu$ L, 0.127 mmol) at room temperature. After stirring for 24 h at the same temperature, the mixture was concentrated under reduced pressure. The residue was purified by preparative TLC ( $\text{CH}_2\text{Cl}_2/\text{MeOH} = 30/1$ ) to give 4-(1-(3-(dodecylthio)-1-oxo-1-(4-(2-(phenoxy sulfonyl)ethyl)piperazin-1-yl)propan-2-yl)-1*H*-1,2,3-triazol-4-yl)phenyl 2-(4-(2-azidoacryloyl)piperazin-1-yl)ethane-1-sulfonate (**14**) (119 mg, 99.6  $\mu$ mol, 97%) as a pale yellow solid.

According to the procedure for preparing triazole **14** from **9a**, bis(triazole) **S2** and tris(triazole) **16** were prepared from triazole **14** and bis(triazole) **S2**, respectively, with 2-phenylethanethiol, butylamine, and 2-(4-(2-azidoacryloyl)piperazin-1-yl)ethane-1-sulfonyl fluoride (**1a**). Also, triazole **S5** was prepared from silyl ether **S4** under the same conditions. The isolated yield of **S5** was calculated from the actual weight obtained as a diastereomeric mixture after the purification.

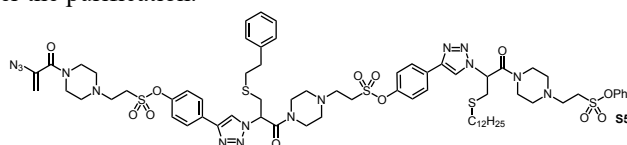



Synthesis of 4-(1-(3-(4-(2-(fluorosulfonyl)ethyl)piperazin-1-yl)-3-oxoprop-1-en-2-yl)-1H-1,2,3-triazol-4-yl)phenyl 2-(4-(3-(dodecylthio)-2-(4-(*p*-tolyl)-1H-1,2,3-triazol-1-yl)propanoyl)piperazin-1-yl)ethane-1-sulfonate (**15**)

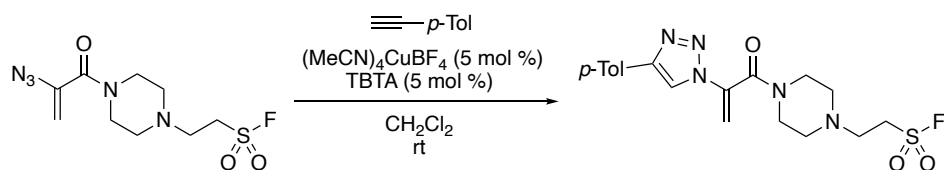

To a solution of 2-(4-(2-(4-azidoacryloyl)piperazin-1-yl)ethane-1-sulfonyl fluoride (**1a**) (21.8 mg, 75.0  $\mu\text{mol}$ ) in  $\text{CH}_2\text{Cl}_2$  (6.0 mL) were added *p*-ethynyltoluene (11.4  $\mu\text{L}$ , 90.0  $\mu\text{mol}$ ),  $(\text{MeCN})_4\text{CuBF}_4$  (1.2 mg, 3.8  $\mu\text{mol}$ ), and TBTA (2.0 mg, 3.8  $\mu\text{mol}$ ) at room temperature. After stirring for 24 h at the same temperature, to the mixture was added water (10 mL). The mixture was extracted with  $\text{CH}_2\text{Cl}_2$  (20 mL  $\times$  2). The combined organic extract was washed with  $\text{H}_2\text{O}$  (10 mL) and dried with  $\text{Na}_2\text{SO}_4$ . After filtration, the filtrate was concentrated under reduced pressure. The residue was purified by preparative TLC ( $\text{CH}_2\text{Cl}_2/\text{MeOH} = 15/1$ ) to give 2-(4-(2-(4-(4-tolyl)-1H-1,2,3-triazol-1-yl)acryloyl)piperazin-1-yl)ethane-1-sulfonyl fluoride (**6**) (23.7 mg, 75.0  $\mu\text{mol}$ , quant.) as a colorless solid.

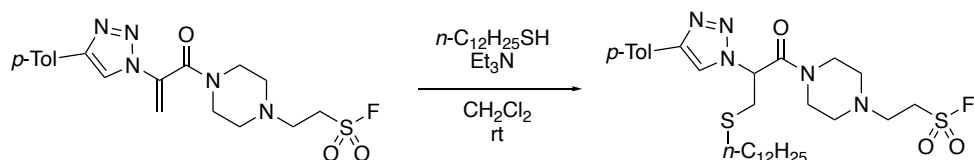

In a 0.3 mL screw-top V-vial<sup>®</sup> with a solid-top cap (Sigma-Aldrich, Cat. No. Z115118), to a solution of 2-(4-(2-(4-(4-tolyl)-1H-1,2,3-triazol-1-yl)acryloyl)piperazin-1-yl)ethane-1-sulfonyl fluoride (**6**) (18.3 mg, 30.0  $\mu\text{mol}$ ) in  $\text{CH}_2\text{Cl}_2$  (0.20 mL) were added triethylamine (6.0  $\mu\text{L}$ , 36  $\mu\text{mol}$ ) and dodecanethiol (10.3  $\mu\text{L}$ , 36.0  $\mu\text{mol}$ ) at 0  $^\circ\text{C}$ . After stirring for 24 h at room temperature, the mixture was concentrated under reduced pressure. The resulting residue was purified by preparative TLC ( $\text{CH}_2\text{Cl}_2/\text{MeOH} = 20/1$ ) to give 2-(4-(3-(dodecylthio)-2-(4-(*p*-tolyl)-1H-1,2,3-triazol-1-yl)propanoyl)piperazin-1-yl)ethane-1-sulfonyl fluoride (**7**) (23.9 mg, 30.0  $\mu\text{mol}$ , quant.) as a colorless oil.

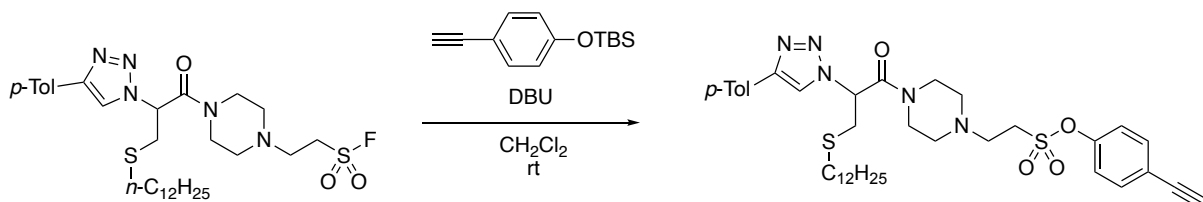

To a solution of 2-(4-(3-(dodecylthio)-2-(4-(*p*-tolyl)-1H-1,2,3-triazol-1-yl)propanoyl)piperazin-1-yl)ethane-1-sulfonyl fluoride (**7**) (60.2 mg, 0.100 mmol) in  $\text{CH}_2\text{Cl}_2$  (600  $\mu\text{L}$ ) was added *tert*-butyl(4-ethynylphenoxy)dimethylsilane (**12a**) (27.8 mg, 0.120 mmol) and DBU (18.3  $\mu\text{L}$ , 0.120 mmol) at room temperature. After stirring for 24 h at the same temperature, the mixture was concentrated under reduced pressure. The residue was purified by preparative TLC ( $\text{CH}_2\text{Cl}_2/\text{MeOH} = 30/1$ ) to give 4-ethynylphenyl 2-(4-(3-(dodecylthio)-2-(4-(*p*-tolyl)-1H-1,2,3-triazol-1-yl)propanoyl)piperazin-1-yl)ethane-1-sulfonate (**8**) (61.4 mg, 88.0  $\mu\text{mol}$ , 88%) as a pale yellow solid.

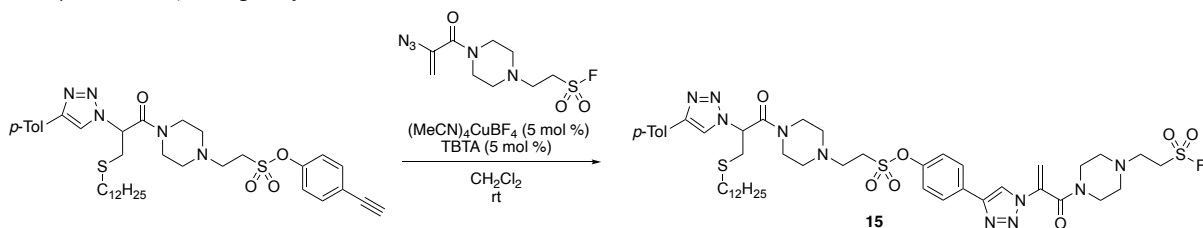

To a solution of 4-ethynylphenyl 2-(4-(3-(dodecylthio)-2-(4-(*p*-tolyl)-1H-1,2,3-triazol-1-yl)propanoyl)piperazin-1-yl)ethane-1-sulfonate (**8**) (21.8 mg, 75.0  $\mu\text{mol}$ ) in  $\text{CH}_2\text{Cl}_2$  (6.0 mL) were added *p*-

ethynyltoluene (11.4  $\mu\text{L}$ , 90.0  $\mu\text{mol}$ ),  $(\text{MeCN})_4\text{CuBF}_4$  (1.2 mg, 3.8  $\mu\text{mol}$ ), and TBTA (2.0 mg, 3.8  $\mu\text{mol}$ ) at room temperature. After stirring for 24 h at the same temperature, to the mixture was added water (10 mL). The mixture was extracted with  $\text{CH}_2\text{Cl}_2$  (20 mL  $\times$  2). The combined organic extract was washed with  $\text{H}_2\text{O}$  (10 mL) and dried with  $\text{Na}_2\text{SO}_4$ . After filtration, the filtrate was concentrated under reduced pressure. The residue was purified by preparative TLC ( $\text{CH}_2\text{Cl}_2/\text{MeOH} = 15/1$ ) to give bis(triazole) **15** (74.9 mg, 75.0  $\mu\text{mol}$ , quant.) as a colorless solid.

#### Synthesis of 1-(3-azido-5-iodophenyl)-*N*-methylmethanamine

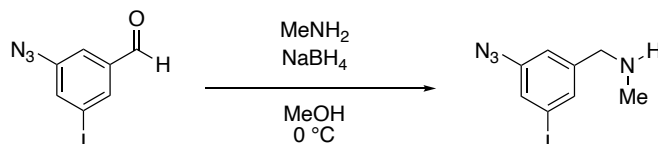

To a solution of 3-azido-5-iodobenzaldehyde (208 mg, 0.762 mmol) in MeOH (2.4 mL) was added methylamine (88.0  $\mu\text{L}$ , 0.762 mmol) at room temperature. After stirring for 20 min at the same temperature, to the mixture was added sodium borohydride (14.4 mg, 0.381 mmol) at 0  $^\circ\text{C}$ . After stirring for 1 h at the same temperature, the mixture was concentrated under reduced pressure. The resulting residue was purified by preparative TLC (*n*-hexane/EtOAc = 1/1) to give 1-(3-azido-5-iodophenyl)-*N*-methylmethanamine (210 mg, 0.730 mmol, quant.) as a colorless oil.

#### Synthesis of *tert*-butyl (3-azido-5-iodobenzyl)(methyl)carbamate

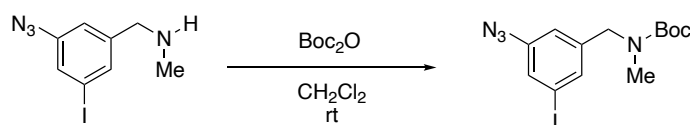

To a solution of 1-(3-azido-5-iodophenyl)-*N*-methylmethanamine (220 mg, 0.763 mmol) in  $\text{CH}_2\text{Cl}_2$  (1.0 mL) was added di-*tert*-butyl dicarbonate (212  $\mu\text{L}$ , 0.916 mmol) at 0  $^\circ\text{C}$ . After warming to room temperature, the mixture was stirred for 12 h at the same temperature. Then, the mixture was concentrated under reduced pressure. The residue was purified by flash column chromatography (silica-gel 11 g, *n*-hexane/EtOAc = 4/1) to give *tert*-butyl (3-azido-5-iodobenzyl)(methyl)carbamate (214 mg, 0.572 mmol, 75%) as a colorless oil.

#### Synthesis of *tert*-butyl (3-amino-5-iodobenzyl)(methyl)carbamate

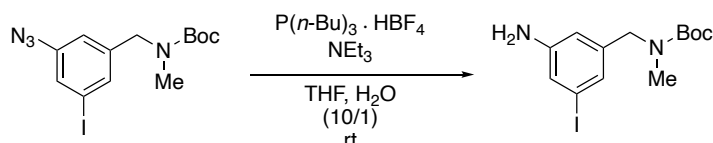

To a solution of *tert*-butyl (3-azido-5-iodobenzyl)(methyl)carbamate (214 mg, 0.573 mmol) and triethylamine (16.3  $\mu\text{L}$ , 0.116 mmol) dissolved in THF (2.3 mL) and  $\text{H}_2\text{O}$  (230  $\mu\text{L}$ ) was added tributylphosphine tetrafluoroborate (166 mg, 0.573 mmol) at room temperature. After stirring for 12 h at the same temperature, the mixture was concentrated under reduced pressure. The residue was purified by preparative TLC (*n*-hexane/EtOAc = 1/1) to give 4-(ethoxycarbonyl)aniline (118 mg, 0.324 mmol, 57%) as a colorless oil.

### Characterization Data of New Compounds

2-(4-(2-(4-(4-Tolyl)-1*H*-1,2,3-triazol-1-yl)acryloyl)piperazin-1-yl)ethane-1-sulfonyl fluoride (**S6**) was identical in spectra data with that reported in the literature.<sup>S10</sup>

*tert*-Butyl (*S*)-3-(2-azidoacrylamido)pyrrolidine-1-carboxylate

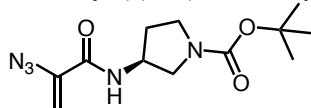

Pale yellow oil; TLC  $R_f$  0.33 (*n*-hexane/EtOAc = 1/1);  $^1\text{H}$  and  $^{13}\text{C}$  NMR analysis show the presence of rotational isomers.  $^1\text{H}$  NMR ( $\text{CDCl}_3$ , 400 MHz):  $\delta$  1.47 (s, 9H), 1.82–1.94 (m, 1H), 2.13–2.24 (m, 1H), 3.15–3.30 (m, 1H), 3.38–3.51 (m, 2H), 3.62–3.68 (m, 1H), 4.44–4.52 (m, 1H), 5.21 (d, 1H,  $J = 2.0$  Hz), 6.19 (d, 1H,  $J = 2.0$  Hz), 6.40–6.53 (br, 1H);  $^{13}\text{C}$  NMR ( $\text{CDCl}_3$ , 101 MHz):  $\delta$  28.5, 30.8, 43.7, 49.7, 51.5, 79.7, 106.9, 138.2, 154.5, 160.4; IR (NaCl,  $\text{cm}^{-1}$ ) 1131, 1166, 1410, 1416, 1525, 1682, 1698, 2119; HRMS (ESI<sup>+</sup>)  $m/z$  304.1384 ([M + Na]<sup>+</sup>  $\text{C}_{12}\text{H}_{19}\text{N}_5\text{NaO}_3^+$  requires 304.1386).

(*S*)-2-Azido-*N*-(pyrrolidin-3-yl)acrylamide

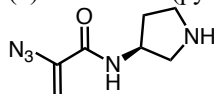

Pale yellow oil; TLC  $R_f$  0.28 ( $\text{CH}_2\text{Cl}_2/\text{MeOH} = 10/1$ );  $^1\text{H}$  NMR ( $\text{CDCl}_3$ , 400 MHz):  $\delta$  1.61–1.71 (m, 1H), 2.14–2.23 (m, 1H), 2.75–2.83 (m, 1H), 2.92–2.99 (m, 1H), 3.04–3.12 (m, 1H), 3.13–3.20 (m, 1H), 5.19 (d, 1H,  $J = 2.0$  Hz), 6.18 (d, 1H,  $J = 2.0$  Hz), 6.54 (br s, 1H);  $^{13}\text{C}$  NMR ( $\text{CDCl}_3$ , 101 MHz):  $\delta$  33.1, 45.7, 50.6, 53.6, 106.5, 138.5, 160.2; IR (NaCl,  $\text{cm}^{-1}$ ) 1521, 1539, 1652, 2117; HRMS (ESI<sup>+</sup>)  $m/z$  204.0862 ([M + Na]<sup>+</sup>  $\text{C}_7\text{H}_{11}\text{N}_5\text{NaO}^+$  requires 204.0861).

(*S*)-2-(3-(2-Azidoacrylamido)pyrrolidin-1-yl)ethane-1-sulfonyl fluoride (**1b**)

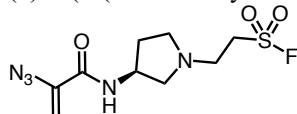

Pale yellow oil; TLC  $R_f$  0.42 ( $\text{CH}_2\text{Cl}_2/\text{MeOH} = 15/1$ );  $^1\text{H}$  NMR ( $\text{CDCl}_3$ , 400 MHz):  $\delta$  1.69–1.76 (m, 1H), 2.28–2.40 (m, 2H), 2.56–2.61 (m, 1H), 2.77–2.81 (m, 1H), 3.03–3.10 (m, 2H), 3.10–3.18 (m, 1H), 3.58–3.63 (m, 2H), 4.48–4.55 (m, 1H), 5.20 (d, 1H,  $J = 2.0$  Hz), 6.15 (d, 1H,  $J = 2.0$  Hz);  $^{13}\text{C}\{^1\text{H}\}$  NMR ( $\text{CDCl}_3$ , 126 MHz):  $\delta$  32.2, 48.2, 49.0, 50.3 (d,  $J = 14.9$  Hz), 52.0, 59.5, 106.6, 138.5, 160.1;  $^{19}\text{F}\{^1\text{H}\}$  NMR ( $\text{CDCl}_3$ , 376 MHz):  $\delta$  58.8 (1F, s); IR (NaCl,  $\text{cm}^{-1}$ ) 1199, 1403, 1519, 1612, 1666, 2122; HRMS (ESI<sup>+</sup>)  $m/z$  314.0700 ([M + Na]<sup>+</sup>  $\text{C}_9\text{H}_{14}\text{FN}_5\text{NaO}_3\text{S}^+$  requires 314.0699).

*tert*-Butyl 4-(2-azidoacrylamido)piperidine-1-carboxylate

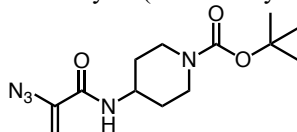

Pale yellow oil; TLC  $R_f$  0.42 (*n*-hexane/EtOAc = 1/1);  $^1\text{H}$  NMR ( $\text{CDCl}_3$ , 400 MHz):  $\delta$  1.30–1.42 (m, 2H), 1.47 (s, 9H), 1.90–1.94 (m, 2H), 2.83–2.94 (m, 2H), 3.90–4.15 (m, 3H), 5.20 (d, 1H,  $J = 2.0$  Hz), 6.18 (d, 1H,  $J = 2.0$  Hz), 6.26–6.34 (br, 1H);  $^{13}\text{C}$  NMR ( $\text{CDCl}_3$ , 101 MHz):  $\delta$  28.4, 31.8, 42.7 (br), 47.0, 79.8, 106.7, 138.4, 154.7, 159.8; IR (NaCl,  $\text{cm}^{-1}$ ) 1141, 1170, 1239, 1366, 1428, 1525, 1614, 1678, 1682, 2121; HRMS (ESI<sup>+</sup>)  $m/z$  318.1543 ([M + Na]<sup>+</sup>  $\text{C}_{13}\text{H}_{21}\text{N}_5\text{NaO}_3^+$  requires 318.1542).

2-Azido-*N*-(piperidin-4-yl)acrylamide

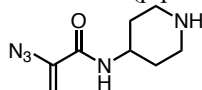

Pale yellow oil; TLC  $R_f$  0.21 ( $\text{CH}_2\text{Cl}_2/\text{MeOH} = 15/1$ );  $^1\text{H}$  NMR ( $\text{CDCl}_3$ , 400 MHz):  $\delta$  1.31–1.41 (m, 2H), 1.91–2.02 (m, 2H), 2.65–2.76 (m, 2H), 3.05–3.14 (m, 2H), 3.84–3.96 (m, 1H), 5.19 (d, 1H,  $J = 2.0$  Hz), 6.18 (d, 1H,  $J = 2.0$  Hz), 6.21–6.39 (br, 1H);  $^{13}\text{C}$  NMR ( $\text{CDCl}_3$ , 126 MHz):  $\delta$  33.3, 45.4, 47.2, 106.6, 138.6, 159.7; IR (NaCl,  $\text{cm}^{-1}$ ) 1521, 1538, 1614, 1652, 1668, 2116; HRMS (ESI<sup>+</sup>)  $m/z$  196.1201 ([M + H]<sup>+</sup>  $\text{C}_8\text{H}_{14}\text{N}_5\text{O}^+$  requires 196.1198).

2-(4-(2-Azidoacrylamido)piperidin-1-yl)ethane-1-sulfonyl fluoride (**1c**)

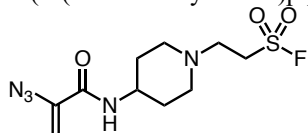

Pale yellow oil; TLC  $R_f$  0.42 ( $\text{CH}_2\text{Cl}_2/\text{MeOH} = 15/1$ );  $^1\text{H}$  and  $^{13}\text{C}$  NMR analysis show the presence of rotational isomers.  $^1\text{H}$  NMR ( $\text{CDCl}_3$ , 400 MHz):  $\delta$  1.47–1.58 (m, 2H), 1.93–2.06 (m, 2H), 2.23–2.32 (m, 2H), 2.84–2.92 (m, 2H), 2.94–3.00 (m, 2H), 3.53–3.60 (m, 2H), 3.80–3.89 (m, 1H), 5.21 (d, 1H,  $J = 2.0$  Hz), 6.19 (d, 1H,  $J = 2.0$  Hz), 6.23–6.33 (br, 1H);  $^{13}\text{C}\{^1\text{H}\}$  NMR ( $\text{CDCl}_3$ , 126 MHz):  $\delta$  31.8, 46.5, 49.2 (d,  $J = 14.4$  Hz), 51.3, 51.9, 106.7, 138.4, 159.9;  $^{19}\text{F}\{^1\text{H}\}$  NMR ( $\text{CDCl}_3$ , 376 MHz):  $\delta$  58.2 (1F, s); IR (NaCl,  $\text{cm}^{-1}$ ) 1196, 1395, 1521, 1539, 1652, 2123; HRMS ( $\text{ESI}^+$ )  $m/z$  328.0858 ( $[\text{M} + \text{Na}]^+$   $\text{C}_{10}\text{H}_{16}\text{FN}_5\text{NaO}_3\text{S}_1^+$  requires 328.0856).

*tert*-Butyl (2-(2-azidoacrylamido)ethyl)(methyl)carbamate

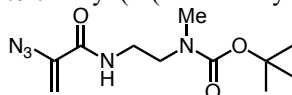

Pale yellow oil; TLC  $R_f$  0.42 ( $n$ -hexane/EtOAc = 1/1);  $^1\text{H}$  and  $^{13}\text{C}$  NMR analysis show the presence of rotational isomers.  $^1\text{H}$  NMR ( $\text{CDCl}_3$ , 400 MHz):  $\delta$  1.48 (s, 9H), 2.85–2.93 (br, 3H), 3.39–3.48 (br, 4H), 5.12–5.21 (br, 1H), 6.05–6.22 (br, 1H), 6.64 and 7.20 (two br s signals, total 1H);  $^{13}\text{C}$  NMR ( $\text{CDCl}_3$ , 101 MHz):  $\delta$  28.3, 34.7, 39.0, 46.9, 80.1, 106.1, 138.7, 157.1, 161.3; IR (NaCl,  $\text{cm}^{-1}$ ) 1157, 1244, 1393, 1525, 1682, 1698, 2119; HRMS ( $\text{ESI}^+$ )  $m/z$  292.1386 ( $[\text{M} + \text{Na}]^+$   $\text{C}_{11}\text{H}_{19}\text{N}_5\text{NaO}_3^+$  requires 292.1386).

2-Azido-*N*-(2-(methylamino)ethyl)acrylamide

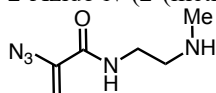

Pale yellow solid; TLC  $R_f$  0.21 ( $\text{CH}_2\text{Cl}_2/\text{MeOH} = 15/1$ );  $^1\text{H}$  NMR ( $\text{CDCl}_3$ , 400 MHz):  $\delta$  2.45 (s, 3H), 2.77 (t, 2H,  $J = 5.8$  Hz), 3.41 (dt, 2H,  $J = 5.8, 5.8$  Hz), 5.19 (d, 1H,  $J = 2.0$  Hz), 6.17 (d, 1H,  $J = 2.0$  Hz), 6.82–6.94 (br, 1H);  $^{13}\text{C}$  NMR ( $\text{CDCl}_3$ , 101 MHz):  $\delta$  36.1, 38.9, 50.3, 106.4, 138.7, 160.8; IR (NaCl,  $\text{cm}^{-1}$ ) 1256, 1539, 1609, 1652, 2117, 3309; HRMS ( $\text{ESI}^+$ )  $m/z$  192.0864 ( $[\text{M} + \text{Na}]^+$   $\text{C}_6\text{H}_{11}\text{N}_5\text{NaO}^+$  requires 192.0861).

2-((2-(2-Azidoacrylamido)ethyl)(methyl)amino)ethane-1-sulfonyl fluoride (**1d**)

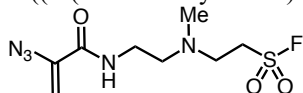

Pale yellow solid; TLC  $R_f$  0.42 ( $\text{CH}_2\text{Cl}_2/\text{MeOH} = 15/1$ );  $^1\text{H}$  NMR ( $\text{CDCl}_3$ , 400 MHz):  $\delta$  2.35 (s, 3H), 2.63 (t, 2H,  $J = 5.8$  Hz), 3.04 (td, 2H,  $J = 6.5, 2.0$  Hz), 3.44 (dt, 2H,  $J = 5.8, 5.8$  Hz), 3.59 (td, 2H,  $J = 6.5, 2.7$  Hz), 5.19 (d, 1H,  $J = 2.0$  Hz), 6.12 (d, 1H,  $J = 2.0$  Hz), 6.85–6.95 (br, 1H);  $^{13}\text{C}\{^1\text{H}\}$  NMR ( $\text{CDCl}_3$ , 126 MHz):  $\delta$  36.7, 41.1, 49.3 (d,  $J = 13.6$  Hz), 51.1, 55.8, 106.4, 138.7, 160.9;  $^{19}\text{F}\{^1\text{H}\}$  NMR ( $\text{CDCl}_3$ , 376 MHz):  $\delta$  58.8 (1F, s); IR (NaCl,  $\text{cm}^{-1}$ ) 1199, 1397, 1521, 1539, 1669, 2123; HRMS ( $\text{ESI}^+$ )  $m/z$  302.0707 ( $[\text{M} + \text{Na}]^+$   $\text{C}_8\text{H}_{14}\text{FN}_5\text{NaO}_3\text{S}^+$  requires 302.0699).

*tert*-Butyl (3-(2-azidoacrylamido)-5-iodobenzyl)(methyl)carbamate

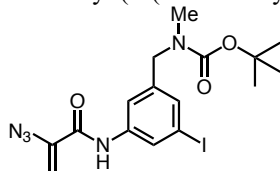

Pale yellow oil; TLC  $R_f$  0.42 ( $n$ -hexane/EtOAc = 1/1);  $^1\text{H}$  and  $^{13}\text{C}$  NMR analysis show the presence of rotational isomers.  $^1\text{H}$  NMR ( $\text{CDCl}_3$ , 400 MHz):  $\delta$  1.48–1.52 (br, 9H), 2.80–2.91 (br, 3H), 4.32–4.43 (br, 2H), 5.33 (d, 1H,  $J = 2.3$  Hz), 6.32 (d, 1H,  $J = 2.3$  Hz), 7.35–7.47 (br, 2H), 7.89–8.06 (br, 1H), 8.07–8.13 (br, 1H);  $^{13}\text{C}$  NMR ( $\text{CDCl}_3$ , 101 MHz):  $\delta$  28.4, 34.2, 51.3, 52.0, 80.2, 94.4, 107.9, 118.0, 127.5, 132.6, 138.1, 141.3, 155.6, 158.3; HRMS ( $\text{ESI}^+$ )  $m/z$  480.0509 ( $[\text{M} + \text{Na}]^+$   $\text{C}_{16}\text{H}_{20}\text{IN}_5\text{NaO}_3^+$  requires 480.0509).

2-Azido-*N*-(3-iodo-5-((methylamino)methyl)phenyl)acrylamide

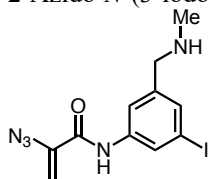

Pale yellow oil; TLC  $R_f$  0.48 ( $\text{CH}_2\text{Cl}_2/\text{MeOH} = 15/1$ );  $^1\text{H}$  NMR ( $\text{CDCl}_3$ , 400 MHz):  $\delta$  2.45 (s, 3H), 3.71 (s, 2H), 5.32 (d, 1H,  $J = 2.0$  Hz), 6.31 (d, 1H,  $J = 2.0$  Hz), 7.49 (dd, 1H,  $J = 1.7, 1.7$  Hz), 7.52 (dd, 1H,  $J = 1.7, 1.7$  Hz), 7.95 (dd, 1H,  $J = 1.7, 1.7$  Hz), 8.10 (br s, 1H);  $^{13}\text{C}$  NMR ( $\text{CDCl}_3$ , 101 MHz):  $\delta$  36.0, 55.1, 94.3, 107.8, 119.0, 127.3, 133.6, 138.0, 138.2, 143.3, 158.3; IR (NaCl,  $\text{cm}^{-1}$ ) 931, 1446, 1531, 1578, 1599, 1694, 2130; HRMS (ESI $^+$ )  $m/z$  358.0164 ( $[\text{M} + \text{H}]^+$   $\text{C}_{11}\text{H}_{13}\text{IN}_3\text{O}^+$  requires 358.0165).

2-((3-(2-Azidoacrylamido)-5-iodobenzyl)(methyl)amino)ethane-1-sulfonyl fluoride (**1e**)

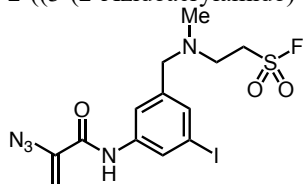

Pale yellow oil; TLC  $R_f$  0.44 ( $n$ -hexane/EtOAc = 2/1);  $^1\text{H}$  NMR ( $\text{CDCl}_3$ , 400 MHz):  $\delta$  2.30 (s, 3H), 3.04 (td, 2H,  $J = 7.1, 1.0$  Hz), 3.54 (s, 2H), 3.59 (td, 2H,  $J = 7.1, 3.4$  Hz), 5.33 (d, 1H,  $J = 2.4$  Hz), 6.32 (d, 1H,  $J = 2.4$  Hz), 7.46–7.48 (m, 1H), 7.53–7.56 (m, 1H), 7.96–7.98 (dd, 1H,  $J = 1.7, 1.7$  Hz), 8.09 (br s, 1H);  $^{13}\text{C}$  NMR ( $\text{CDCl}_3$ , 101 MHz):  $\delta$  41.7, 49.1 (d,  $J = 14.0$  Hz), 50.7, 61.0, 94.3, 107.9, 119.4, 127.8, 134.0, 138.1, 138.2, 141.1, 158.3;  $^{19}\text{F}$  NMR ( $\text{CDCl}_3$ , 376 MHz):  $\delta$  58.2 (1F, s); IR (NaCl,  $\text{cm}^{-1}$ ) 895, 1203, 1266, 1420, 1529, 1578, 1697, 2130, 3054; HRMS (ESI $^+$ )  $m/z$  489.9823 ( $[\text{M} + \text{Na}]^+$   $\text{C}_{13}\text{H}_{15}\text{FIN}_3\text{NaO}_3\text{S}^+$  requires 489.9822).

Benzo[*d*][1,3]dioxol-5-yl 2-(4-(2-azidoacryloyl)piperazin-1-yl)ethane-1-sulfonate (**9b**)

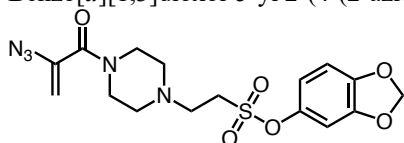

Colorless solid; TLC  $R_f$  0.68 ( $\text{CH}_2\text{Cl}_2/\text{MeOH} = 15/1$ );  $^1\text{H}$  NMR ( $\text{CDCl}_3$ , 400 MHz):  $\delta$  2.55–2.63 (m, 4H), 3.02 (t, 2H,  $J = 7.4$  Hz), 3.45 (t, 2H,  $J = 7.4$  Hz), 3.61–3.72 (br, 4H), 5.06 (d, 1H,  $J = 2.1$  Hz), 5.11 (d, 1H,  $J = 2.1$  Hz), 6.04 (s, 2H), 6.74 (dd,  $J = 8.4, 2.4$  Hz, 1H), 6.78–6.83 (m, 2H);  $^{13}\text{C}$  NMR ( $\text{CDCl}_3$ , 101 MHz):  $\delta$  42.0 (br), 47.1 (br), 47.7, 51.5, 52.4 (br), 53.0 (br), 102.2, 104.0, 104.2, 108.2, 114.9, 139.5, 142.9, 146.8, 148.4, 163.3; IR (NaCl,  $\text{cm}^{-1}$ ) 858, 1035, 1160, 1367, 1482, 1644, 2109, 2908; HRMS (ESI $^+$ )  $m/z$  432.0953 ( $[\text{M} + \text{Na}]^+$   $\text{C}_{16}\text{H}_{19}\text{N}_5\text{NaO}_6\text{S}^+$  requires 432.0954).

2-Oxo-2*H*-chromen-7-yl 2-(4-(2-azidoacryloyl)piperazin-1-yl)ethane-1-sulfonate (**9c**)

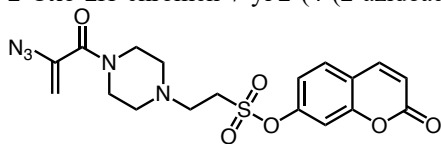

Colorless solid; TLC  $R_f$  0.45 ( $\text{CH}_2\text{Cl}_2/\text{MeOH} = 15/1$ );  $^1\text{H}$  NMR ( $\text{CDCl}_3$ , 400 MHz):  $\delta$  2.55–2.63 (m, 4H), 3.06 (t, 2H,  $J = 7.2$  Hz), 3.54 (t, 2H,  $J = 7.2$  Hz), 3.62–3.72 (br, 4H), 5.07 (d, 1H,  $J = 2.1$  Hz), 5.12 (d, 1H,  $J = 2.1$  Hz), 6.47 (d, 1H,  $J = 9.6$  Hz), 7.24–7.31 (m, 2H), 7.57 (d, 1H,  $J = 8.5$  Hz), 7.73 (d, 1H,  $J = 9.6$  Hz);  $^{13}\text{C}$  NMR ( $\text{CDCl}_3$ , 101 MHz):  $\delta$  41.9 (br), 47.0 (br), 48.8, 51.5, 52.4 (br), 53.2 (br), 104.0, 110.8, 117.0, 117.9, 118.6, 129.2, 139.5, 142.5, 150.7, 154.7, 159.8, 163.3; IR (NaCl,  $\text{cm}^{-1}$ ) 852, 985, 1111, 1170, 1229, 1259, 1367, 1611, 1639, 1732, 2106; HRMS (ESI $^+$ )  $m/z$  456.0952 ( $[\text{M} + \text{Na}]^+$   $\text{C}_{18}\text{H}_{19}\text{N}_5\text{NaO}_6\text{S}^+$  requires 456.0954).

2,6-Dimethoxyphenyl 2-(4-(2-azidoacryloyl)piperazin-1-yl)ethane-1-sulfonate (**9d**)

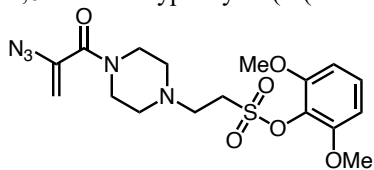

Pale yellow oil; TLC  $R_f$  0.68 ( $\text{CH}_2\text{Cl}_2/\text{MeOH} = 15/1$ );  $^1\text{H NMR}$  ( $\text{CDCl}_3$ , 400 MHz):  $\delta$  2.55–2.63 (m, 4H), 3.08–3.14 (m, 2H), 3.61–3.71 (m, 6H), 3.90 (s, 6H), 5.06 (d, 1H,  $J = 2.1$  Hz), 5.11 (d, 1H,  $J = 2.1$  Hz), 6.64 (d, 2H,  $J = 8.5$  Hz), 7.20 (dd, 1H,  $J = 8.5$  Hz);  $^{13}\text{C NMR}$  ( $\text{CDCl}_3$ , 101 MHz):  $\delta$  42.0 (br), 47.2 (br), 50.3, 51.8, 52.2 (br), 53.1 (br), 56.3, 103.9, 105.0, 127.5, 128.1, 139.6, 153.3, 163.3; IR ( $\text{NaCl}$ ,  $\text{cm}^{-1}$ ) 868, 1111, 1153, 1263, 1306, 1366, 1483, 1614, 1644, 2107; HRMS ( $\text{ESI}^+$ )  $m/z$  448.1265 ( $[\text{M} + \text{Na}]^+$   $\text{C}_{17}\text{H}_{23}\text{N}_5\text{NaO}_6\text{S}^+$  requires 448.1267).

(8*R*,9*S*,13*S*,14*S*)-17-Hydroxy-13-methyl-7,8,9,11,12,13,14,15,16,17-decahydro-6*H*-cyclopenta[*a*]phenanthren-3-yl 2-(4-(2-azidoacryloyl)piperazin-1-yl)ethane-1-sulfonate (**9e**)

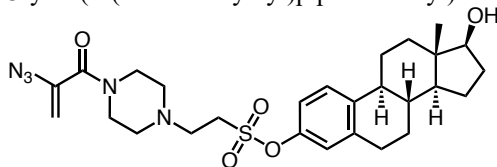

Colorless solid; TLC  $R_f$  0.38 ( $n$ -hexane/EtOAc = 1/1);  $^1\text{H NMR}$  ( $\text{CDCl}_3$ , 400 MHz):  $\delta$  0.80 (s, 3H), 1.19–1.62 (m, 6H), 1.68–1.77 (m, 2H), 1.87–1.99 (m, 2H), 2.10–2.36 (m, 3H), 2.52–2.58 (m, 4H), 2.86–2.93 (m, 2H), 3.04 (t, 2H,  $J = 7.4$  Hz), 3.45 (t, 2H,  $J = 7.4$  Hz), 3.60–3.71 (br, 4H), 3.75 (t, 1H,  $J = 8.56$  Hz), 5.06 (d, 1H,  $J = 2.0$  Hz), 5.11 (d, 1H,  $J = 2.0$  Hz), 6.98–7.06 (m, 2H), 7.31–7.35 (m, 1H);  $^{13}\text{C NMR}$  ( $\text{CDCl}_3$ , 101 MHz):  $\delta$  11.1, 23.1, 26.1, 26.9, 30.0, 30.6, 36.6, 38.4, 41.9 (br), 43.2, 44.1, 47.1 (br), 47.8, 50.0, 51.6, 52.3 (br), 53.1 (br), 81.8, 104.0, 118.8, 121.9, 127.0, 139.1, 139.5, 139.8, 146.7, 163.3; IR ( $\text{NaCl}$ ,  $\text{cm}^{-1}$ ) 920, 1130, 1169, 1244, 1367, 1445, 1490, 1614, 1639, 2107, 2927; HRMS ( $\text{ESI}^+$ )  $m/z$  566.2413 ( $[\text{M} + \text{Na}]^+$   $\text{C}_{27}\text{H}_{37}\text{N}_5\text{NaO}_5\text{S}^+$  requires 566.2413).

4-Acetamidophenyl 2-(4-(2-azidoacryloyl)piperazin-1-yl)ethane-1-sulfonate (**9f**)

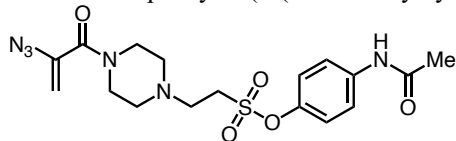

Colorless solid; TLC  $R_f$  0.48 ( $\text{CH}_2\text{Cl}_2/\text{MeOH} = 15/1$ );  $^1\text{H NMR}$  ( $\text{CDCl}_3$ , 400 MHz):  $\delta$  2.19 (s, 3H), 2.55–2.63 (m, 4H), 3.02 (t, 2H,  $J = 7.3$  Hz), 3.45 (t, 2H,  $J = 7.3$  Hz), 3.60–3.71 (m, 4H), 5.06 (d, 1H,  $J = 2.2$  Hz), 5.11 (d, 1H,  $J = 2.2$  Hz), 7.22 (d, 2H,  $J = 9.0$  Hz), 7.58 (d, 2H,  $J = 9.0$  Hz), 7.78 (br s, 1H);  $^{13}\text{C NMR}$  ( $\text{CDCl}_3$ , 101 MHz):  $\delta$  24.5, 41.9 (br), 47.1 (br), 47.8, 51.5, 52.3 (br), 53.1 (br), 104.0, 121.2, 122.6, 137.3, 139.5, 144.7, 163.3, 168.7; IR ( $\text{NaCl}$ ,  $\text{cm}^{-1}$ ) 868, 1150, 1366, 1503, 1614, 1634, 1644, 2107, 2931, 3315; HRMS ( $\text{ESI}^+$ )  $m/z$  445.1274 ( $[\text{M} + \text{Na}]^+$   $\text{C}_{17}\text{H}_{22}\text{N}_6\text{NaO}_5\text{S}^+$  requires 445.1270).

Methyl (*S*)-2-amino-3-(4-(((2-(4-(2-azidoacryloyl)piperazin-1-yl)ethyl)sulfonyl)oxy)phenyl)propanoate (**9g**)

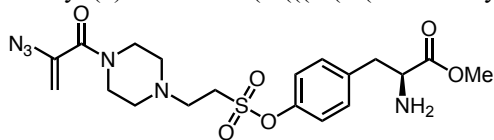

Pale yellow oil; TLC  $R_f$  0.26 ( $\text{CH}_2\text{Cl}_2/\text{MeOH} = 15/1$ );  $^1\text{H NMR}$  ( $\text{CDCl}_3$ , 400 MHz):  $\delta$  2.55–2.63 (m, 4H), 2.86–2.92 (m, 1H), 3.03 (t, 2H,  $J = 7.4$  Hz), 3.07–3.14 (m, 1H), 3.46 (t, 2H,  $J = 7.4$  Hz), 3.60–3.70 (br, 4H), 3.72–3.78 (m, 4H), 5.06 (d, 1H,  $J = 2.1$  Hz), 5.11 (d, 1H,  $J = 2.1$  Hz), 7.20–7.30 (m, 4H);  $^{13}\text{C NMR}$  ( $\text{CDCl}_3$ , 101 MHz):  $\delta$  40.3, 41.9 (br), 47.0 (br), 48.0, 51.6, 52.2, 52.3 (br), 53.1 (br), 55.7, 104.0, 122.1, 130.9, 136.9, 139.5, 147.8, 163.3, 175.2; IR ( $\text{NaCl}$ ,  $\text{cm}^{-1}$ ) 868, 1147, 1366, 1644, 1732, 2107, 2904; HRMS ( $\text{ESI}^+$ )  $m/z$  467.1714 ( $[\text{M} + \text{Na}]^+$   $\text{C}_{19}\text{H}_{26}\text{N}_6\text{NaO}_6\text{S}^+$  requires 467.1713).

3-Aminophenyl 2-(4-(2-azidoacryloyl)piperazin-1-yl)ethane-1-sulfonate (**9h**)

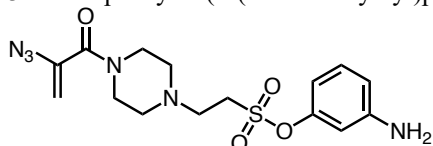

Pale yellow oil; TLC  $R_f$  0.30 ( $\text{CH}_2\text{Cl}_2/\text{MeOH} = 15/1$ );  $^1\text{H}$  NMR ( $\text{CDCl}_3$ , 400 MHz):  $\delta$  2.55–2.63 (m, 4H), 3.02 (t, 2H,  $J = 7.4$  Hz), 3.44 (t, 2H,  $J = 7.4$  Hz), 3.59–3.73 (br, 4H), 3.84–3.92 (br, 2H), 5.06 (d, 1H,  $J = 2.1$  Hz), 5.11 (d, 1H,  $J = 2.1$  Hz), 6.61–6.65 (m, 3H), 7.14–7.20 (m, 1H);  $^{13}\text{C}$  NMR ( $\text{CDCl}_3$ , 101 MHz):  $\delta$  41.9 (br), 47.1 (br), 47.8, 51.5, 52.3 (br), 53.1 (br), 104.0, 108.3, 111.1, 113.9, 130.5, 139.5, 148.2, 150.1, 163.3; IR (NaCl,  $\text{cm}^{-1}$ ) 811, 1121, 1171, 1360, 1615, 1634, 2106; HRMS (ESI<sup>+</sup>)  $m/z$  403.1164 ( $[\text{M} + \text{Na}]^+$   $\text{C}_{15}\text{H}_{20}\text{N}_6\text{NaO}_4\text{S}^+$  requires 403.1164).

Quinolin-5-yl 2-(4-(2-azidoacryloyl)piperazin-1-yl)ethane-1-sulfonate (**9i**)

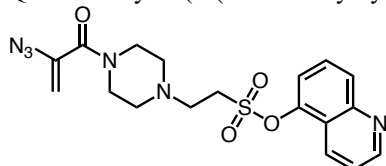

Pale yellow oil; TLC  $R_f$  0.28 ( $\text{CH}_2\text{Cl}_2/\text{MeOH} = 15/1$ );  $^1\text{H}$  NMR ( $\text{CDCl}_3$ , 400 MHz):  $\delta$  2.55–2.63 (m, 4H), 3.08–3.13 (m, 2H), 3.60–3.71 (m, 6H), 5.06 (d, 1H,  $J = 2.1$  Hz), 5.11 (d, 1H,  $J = 2.1$  Hz), 7.51–7.59 (m, 2H), 7.75 (t, 1H,  $J = 8.2$  Hz), 8.13 (d, 1H,  $J = 8.6$  Hz), 8.49–8.53 (m, 1H), 8.99–9.02 (m, 1H);  $^{13}\text{C}$  NMR ( $\text{CDCl}_3$ , 101 MHz):  $\delta$  41.9 (br), 47.0 (br), 48.9, 51.6, 52.4 (br), 53.1 (br), 104.0, 118.9, 122.0, 123.0, 128.7, 129.1, 130.5, 139.5, 144.1, 149.0, 151.4, 163.3; IR (NaCl,  $\text{cm}^{-1}$ ) 897, 1003, 1171, 1362, 1615, 1644, 2107; HRMS (ESI<sup>+</sup>)  $m/z$  417.1338 ( $[\text{M} + \text{H}]^+$   $\text{C}_{18}\text{H}_{21}\text{N}_6\text{O}_4\text{S}^+$  requires 417.1340).

Pyridin-2-yl 2-(4-(2-azidoacryloyl)piperazin-1-yl)ethane-1-sulfonate (**9j**)

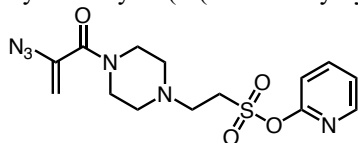

Colorless solid; TLC  $R_f$  0.37 ( $\text{CH}_2\text{Cl}_2/\text{MeOH} = 15/1$ );  $^1\text{H}$  NMR ( $\text{CDCl}_3$ , 400 MHz):  $\delta$  2.55–2.63 (m, 4H), 3.08–3.13 (m, 2H), 3.58–3.70 (br, 4H), 3.88–3.93 (m, 2H), 5.05 (d, 1H,  $J = 2.1$  Hz), 5.10 (d, 1H,  $J = 2.1$  Hz), 7.14–7.18 (m, 1H), 7.29–7.33 (m, 1H), 7.83–7.89 (m, 1H), 8.35–8.37 (m, 1H);  $^{13}\text{C}$  NMR ( $\text{CDCl}_3$ , 101 MHz):  $\delta$  41.9 (br), 47.1 (br), 50.8, 51.6, 52.2 (br), 53.0 (br), 103.9, 115.9, 122.9, 139.6, 140.6, 148.1, 157.5, 163.3; IR (NaCl,  $\text{cm}^{-1}$ ) 869, 1211, 1372, 1435, 1651, 2104; HRMS (ESI<sup>+</sup>)  $m/z$  389.1010 ( $[\text{M} + \text{Na}]^+$   $\text{C}_{14}\text{H}_{18}\text{N}_6\text{NaO}_4\text{S}^+$  requires 410.2016).

3,3,4,4,5,5,6,6,6-Undecafluorohexyl 2-(4-(2-azidoacryloyl)piperazin-1-yl)ethane-1-sulfonate (**9k**)

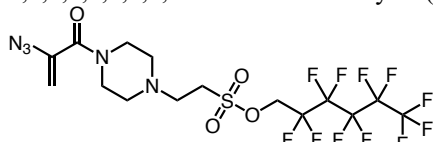

Pale yellow solid; TLC  $R_f$  0.28 ( $\text{CH}_2\text{Cl}_2/\text{MeOH} = 10/1$ );  $^1\text{H}$  NMR ( $\text{CDCl}_3$ , 400 MHz):  $\delta$  2.53–2.57 (m, 4H), 2.96 (t, 2H,  $J = 7.1$ ), 3.46 (t, 2H,  $J = 7.1$ ), 3.60–3.71 (br, 4H), 4.67–4.71 (m, 2H), 5.07 (d, 1H,  $J = 2.1$  Hz), 5.11 (d, 1H,  $J = 2.1$  Hz);  $^{13}\text{C}$  NMR ( $\text{CDCl}_3$ , 101 MHz):  $\delta$  41.8 (br), 47.0 (br), 49.2, 51.5, 52.3 (br), 53.1 (br), 63.1 (t,  $J = 27.0$  Hz), 104.0, 108.5–118.6 (m), 139.5, 163.3; IR (NaCl,  $\text{cm}^{-1}$ ) 804, 1035, 1171, 1254, 1367, 1446, 1466, 1634, 2109; HRMS (ESI<sup>+</sup>)  $m/z$  594.0643 ( $[\text{M} + \text{Na}]^+$   $\text{C}_{15}\text{H}_{16}\text{F}_{11}\text{N}_5\text{NaO}_4\text{S}^+$  requires 594.0645).

Phenyl 2-(4-(2-(4-(2-hydroxypropan-2-yl)-1H-1,2,3-triazol-1-yl)acryloyl)piperazin-1-yl)ethane-1-sulfonate (**10b**)

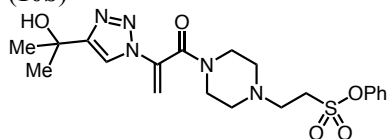

Colorless solid; TLC  $R_f$  0.48 ( $\text{CH}_2\text{Cl}_2/\text{MeOH} = 10/1$ );  $^1\text{H}$  NMR ( $\text{CDCl}_3$ , 400 MHz):  $\delta$  1.66 (s, 6H), 2.45–2.64 (br, 4H), 3.03 (t, 2H,  $J = 7.3$  Hz), 3.46 (t, 2H,  $J = 7.3$  Hz), 3.51–3.82 (m, 4H), 5.36 (d, 1H,  $J = 1.8$  Hz), 5.94 (d, 1H,  $J = 1.8$  Hz), 7.27–7.46 (m, 5H), 7.78 (s, 1H);  $^{13}\text{C}$  NMR ( $\text{CDCl}_3$ , 101 MHz):  $\delta$  30.4, 42.0 (br), 47.1 (br), 47.9, 51.5, 52.1 (br), 52.8 (br), 68.6, 108.2, 118.0, 122.0, 127.5, 130.1, 136.6, 149.0, 156.1, 162.6; IR (NaCl,  $\text{cm}^{-1}$ ) 867, 1000,

1030, 1144, 1169, 1266, 1369, 1443, 1468, 1488, 1641, 1651; HRMS (ESI<sup>+</sup>) *m/z* 472.1633 ([M + Na]<sup>+</sup> C<sub>20</sub>H<sub>27</sub>N<sub>5</sub>NaO<sub>5</sub>S<sup>+</sup> requires 472.1631).

Phenyl 2-(4-(2-(4-(pyridin-2-yl)-1*H*-1,2,3-triazol-1-yl)acryloyl)piperazin-1-yl)ethane-1-sulfonate (**10c**)

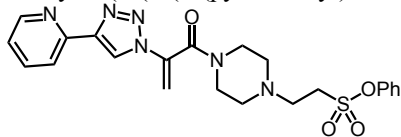

Pale yellow oil; TLC *R<sub>f</sub>* 0.46 (CH<sub>2</sub>Cl<sub>2</sub>/MeOH = 15/1); <sup>1</sup>H NMR (CDCl<sub>3</sub>, 400 MHz): δ 2.48–2.67 (br, 4H), 3.04 (t, 2H, *J* = 7.4 Hz), 3.45 (t, 2H, *J* = 7.4 Hz), 3.50–3.58 (br, 2H), 3.77–3.84 (br, 2H), 5.45 (d, 1H, *J* = 2.1 Hz), 6.05 (d, 1H, *J* = 2.1 Hz), 7.26–7.31 (m, 3H), 7.32–7.38 (m, 1H), 7.41–7.46 (m, 2H), 7.83 (ddd, 1H, *J* = 7.8, 7.7, 1.7 Hz), 8.22 (d, 1H, *J* = 7.9 Hz), 8.46 (s, 1H), 8.62 (d, 1H, *J* = 4.4 Hz); <sup>13</sup>C NMR (CDCl<sub>3</sub>, 101 MHz): δ 42.0 (br), 47.0 (br), 48.0, 51.5, 52.1 (br), 52.8 (br), 108.5, 120.3, 120.6, 122.0 (two signals overlapped), 123.4, 127.4, 130.1, 136.8, 137.1, 148.7, 149.0, 149.6, 162.3; IR (NaCl, cm<sup>-1</sup>) 865, 1023, 1144, 1367, 1470, 1602, 1651; HRMS (ESI<sup>+</sup>) *m/z* 491.1478 ([M + Na]<sup>+</sup> C<sub>22</sub>H<sub>24</sub>N<sub>6</sub>NaO<sub>4</sub>S<sup>+</sup> requires 491.1477).

Phenyl 2-(4-(2-(4-((2-iodo-3-(((trifluoromethyl)sulfonyl)oxy)phenoxy)methyl)-1*H*-1,2,3-triazol-1-yl)acryloyl)piperazin-1-yl)ethane-1-sulfonate (**10d**)

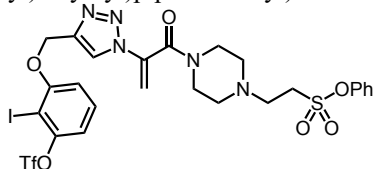

Colorless solid; TLC *R<sub>f</sub>* 0.60 (CH<sub>2</sub>Cl<sub>2</sub>/MeOH = 15/1); <sup>1</sup>H NMR (CDCl<sub>3</sub>, 400 MHz): δ 2.45–2.65 (br, 4H), 3.03 (t, 2H, *J* = 7.3 Hz), 3.46 (t, 2H, *J* = 7.3 Hz), 3.50–3.60 (br, 2H), 3.73–3.83 (br, 2H), 5.37 (s, 2H), 5.46 (d, 1H, *J* = 2.1 Hz), 6.04 (d, 1H, *J* = 2.1 Hz), 6.99–7.08 (m, 2H), 7.27–7.31 (m, 2H), 7.32–7.38 (m, 1H), 7.39–7.48 (m, 3H), 8.07 (s, 1H); <sup>13</sup>C NMR (CDCl<sub>3</sub>, 101 MHz): δ 42.1 (br), 47.1 (br), 48.0, 51.5, 52.2 (br), 52.9 (br), 63.7, 83.5, 109.3, 111.9, 115.0, 121.9, 122.0, 127.5, 130.1, 130.6, 136.4, 143.8, 149.0, 151.3, 158.9, 162.4; <sup>19</sup>F NMR (CDCl<sub>3</sub>, 376 MHz): δ -73.2 (1F, s); IR (NaCl, cm<sup>-1</sup>) 865, 1037, 1141, 1219, 1267, 1367, 1423, 1455, 1488, 1588, 1651; HRMS (ESI<sup>+</sup>) *m/z* 794.0038 ([M + Na]<sup>+</sup> C<sub>25</sub>H<sub>25</sub>F<sub>3</sub>IN<sub>5</sub>NaO<sub>8</sub>S<sub>2</sub><sup>+</sup> requires 794.0039).

Phenyl 2-(4-(2-(4-((4-formylphenoxy)methyl)-1*H*-1,2,3-triazol-1-yl)acryloyl)piperazin-1-yl)ethane-1-sulfonate (**10e**)

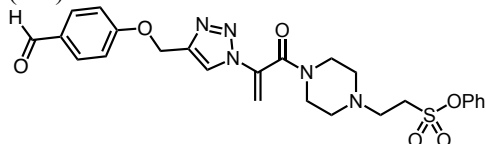

Colorless oil; TLC *R<sub>f</sub>* 0.49 (CH<sub>2</sub>Cl<sub>2</sub>/MeOH = 15/1); <sup>1</sup>H NMR (CDCl<sub>3</sub>, 400 MHz): δ 2.45–2.66 (br, 4H), 3.02 (t, 2H, *J* = 7.4 Hz), 3.45 (t, 2H, *J* = 7.4 Hz), 3.51–3.61 (br, 2H), 3.71–3.82 (br, 2H), 5.34 (s, 2H), 5.44 (d, 1H, *J* = 2.1 Hz), 6.05 (d, 1H, *J* = 2.1 Hz), 7.12–7.17 (m, 2H), 7.28–7.32 (m, 2H), 7.33–7.38 (m, 1H), 7.42–7.47 (m, 2H), 7.86–7.83 (m, 2H), 8.00 (s, 1H), 9.92 (s, 1H); <sup>13</sup>C NMR (CDCl<sub>3</sub>, 101 MHz): δ 42.0 (br), 47.2 (br), 48.0, 51.5, 52.1 (br), 52.9 (br), 61.9, 109.4, 115.1, 121.9, 122.0, 127.5, 130.1, 130.5, 132.1, 136.2, 143.7, 149.0, 162.4, 162.9, 190.8; IR (NaCl, cm<sup>-1</sup>) 865, 1003, 1144, 1163, 1247, 1367, 1488, 1599, 1651, 1694; HRMS (ESI<sup>+</sup>) *m/z* 548.1577 ([M + Na]<sup>+</sup> C<sub>25</sub>H<sub>27</sub>N<sub>5</sub>NaO<sub>6</sub>S<sup>+</sup> requires 548.1580).

Phenyl 2-(4-(2-(4-((ferrocenylcarbonylamino)methyl)-1*H*-1,2,3-triazol-1-yl)acryloyl)piperazin-1-yl)ethane-1-sulfonate (**10f**)

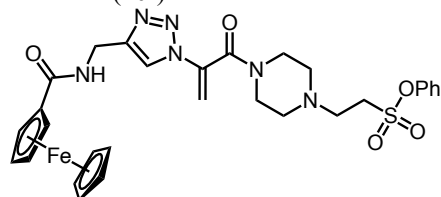

Pale yellow solid; TLC *R<sub>f</sub>* 0.22 (CH<sub>2</sub>Cl<sub>2</sub>/MeOH = 15/1); <sup>1</sup>H NMR (CDCl<sub>3</sub>, 400 MHz): δ 2.42–2.63 (br, 4H), 3.00 (t, 2H, *J* = 7.4 Hz), 3.42 (t, 2H, *J* = 7.4 Hz), 3.46–3.53 (br, 2H), 3.72–3.80 (br, 2H), 4.16 (s, 5H), 4.36 (dd, 2H, *J* = 1.9, 1.9 Hz), 4.66 (d, 2H, *J* = 6.0 Hz), 4.70 (dd, 2H, *J* = 1.9, 1.9 Hz), 5.38 (d, 1H, *J* = 2.1 Hz), 5.96 (d, 1H, *J* = 2.1 Hz), 6.58 (dd, 1H, *J* = 5.9, 5.9 Hz), 7.26–7.30 (m, 2H), 7.32–7.38 (m, 1H), 7.41–7.46 (m, 2H), 7.95 (s, 1H); <sup>13</sup>C NMR (CDCl<sub>3</sub>, 101 MHz): δ 34.8, 42.0 (br), 47.0 (br), 47.9, 51.4, 52.0 (br), 52.7 (br), 68.2, 69.8, 70.7, 75.2,



108.3, 121.0, 122.0, 127.4, 130.1, 136.6, 145.6, 149.0, 162.4, 170.7; IR (NaCl,  $\text{cm}^{-1}$ ) 865, 1001, 1144, 1286, 1367, 1435, 1445, 1538, 1651; HRMS (ESI<sup>+</sup>)  $m/z$  655.1405 ([M + Na]<sup>+</sup> C<sub>29</sub>H<sub>32</sub>FeN<sub>6</sub>NaO<sub>5</sub>S<sup>+</sup> requires 655.1402).

Phenyl 2-(4-(2-(4-(1-((2*R*,4*S*,5*R*)-4-hydroxy-5-(hydroxymethyl)tetrahydrofuran-2-yl)-2,4-dioxo-1,2,3,4-tetrahydropyrimidin-5-yl)-1*H*-1,2,3-triazol-1-yl)acryloyl)piperazin-1-yl)ethane-1-sulfonate (**10g**)

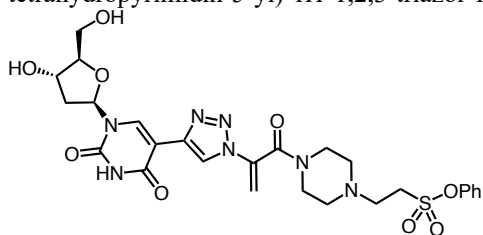

Colorless solid; TLC  $R_f$  0.22 (CH<sub>2</sub>Cl<sub>2</sub>/MeOH = 10/1); <sup>1</sup>H NMR (CD<sub>3</sub>OD, 400 MHz):  $\delta$  2.28–2.41 (m, 2H), 2.50–2.70 (m, 4H), 3.03 (t, 2H,  $J = 7.2$  Hz), 3.53–3.68 (m, 4H), 3.72–3.89 (m, 4H), 3.97–4.13 (m, 1H), 4.46–4.49 (m, 1H), 5.52 (d, 1H,  $J = 2.5$  Hz), 6.08 (d, 1H,  $J = 2.5$  Hz), 6.37 (t, 1H,  $J = 6.7$  Hz), 7.31–7.50 (m, 5H), 8.63 (s, 1H), 8.78 (s, 1H); <sup>13</sup>C NMR (CD<sub>3</sub>OD, 101 MHz):  $\delta$  43.0, 44.5, 50.9, 54.0, 54.4, 55.0, 64.3, 73.8, 88.5, 90.6, 107.5, 110.3, 122.7, 124.7, 129.8, 132.5, 139.5, 140.2, 142.9, 152.2, 152.9, 164.5, 165.8; IR (NaCl,  $\text{cm}^{-1}$ ) 1144, 1622, 1712; HRMS (ESI<sup>+</sup>)  $m/z$  640.1803 ([M + Na]<sup>+</sup> C<sub>26</sub>H<sub>31</sub>N<sub>7</sub>NaO<sub>9</sub>S<sup>+</sup> requires 640.1802).

Phenyl 2-(4-(2-(4-(((*tert*-butoxycarbonyl)(2-(2-((6-chlorohexyl)oxy)ethoxy)ethyl)amino)methyl)-1*H*-1,2,3-triazol-1-yl)acryloyl)piperazin-1-yl)ethane-1-sulfonate (**10h**)

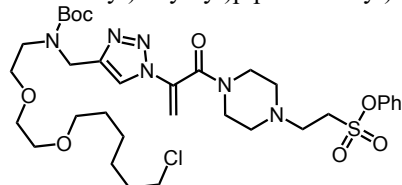

Colorless solid; TLC  $R_f$  0.48 (CH<sub>2</sub>Cl<sub>2</sub>/MeOH = 15/1); <sup>1</sup>H and <sup>13</sup>C NMR analysis show the presence of rotational isomers. <sup>1</sup>H NMR (CDCl<sub>3</sub>, 400 MHz):  $\delta$  1.35–1.52 (m, 13H), 1.58–1.67 (m, 2H), 1.72–1.82 (m, 2H), 2.46–2.65 (m, 4H), 3.03 (t, 2H,  $J = 7.3$  Hz), 3.41–3.83 (m, 18H), 4.58–4.63 (br, 2H), 5.33–5.39 (br, 1H), 5.89–5.98 (br, 1H), 7.26–7.48 (m, 5H), 7.78–7.87 (br, 1H); <sup>13</sup>C NMR (CDCl<sub>3</sub>, 101 MHz):  $\delta$  25.4, 26.7, 28.5, 29.5, 32.6, 41.9, 42.9, 45.1, 47.0, 48.0, 51.5, 52.1, 52.8, 69.7, 70.1, 70.2, 70.4, 71.3, 80.2, 107.8 (br), 121.1 (br), 122.0, 127.4, 130.1, 136.9 (br), 145.9 (br), 146.4, 149.0, 155.6 (br), 162.5; IR (NaCl,  $\text{cm}^{-1}$ ) 865, 1037, 1144, 1169, 1267, 1366, 1412, 1455, 1651, 1694, 2864, 2936; HRMS (ESI<sup>+</sup>)  $m/z$  727.3250 ([M + H]<sup>+</sup> C<sub>33</sub>H<sub>52</sub>ClN<sub>6</sub>O<sub>8</sub>S<sup>+</sup> requires 727.3250).

Phenyl 2-(4-(2-(4-(((5-((3*aR*,4*R*,6*aS*)-2-oxohexahydro-1*H*-thieno[3,4-*d*]imidazol-4-yl)pentanamido)methyl)-1*H*-1,2,3-triazol-1-yl)acryloyl)piperazin-1-yl)ethane-1-sulfonate (**10i**)

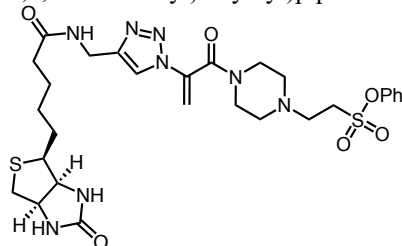

Colorless solid; TLC  $R_f$  0.20 (CH<sub>2</sub>Cl<sub>2</sub>/MeOH = 10/1); <sup>1</sup>H NMR (CD<sub>3</sub>OD, 400 MHz):  $\delta$  1.39–1.44 (m, 2H), 1.57–1.75 (m, 4H), 2.27 (t, 2H,  $J = 7.4$  Hz), 2.51–2.68 (m, 4H), 2.71 (d, 1H,  $J = 12.7$  Hz), 2.92–2.96 (m, 1H), 3.02 (t, 2H,  $J = 7.2$  Hz), 3.17–3.23 (m, 1H), 3.52–3.57 (br, 2H), 3.64 (t, 2H,  $J = 7.2$  Hz), 3.72–3.80 (br, 2H), 4.28–4.32 (m, 1H), 4.47–4.53 (m, 3H), 5.50 (d, 1H,  $J = 2.5$  Hz), 6.04 (d, 1H,  $J = 2.5$  Hz), 7.33–7.39 (m, 3H), 7.45–7.51 (m, 2H), 8.23 (s, 1H); <sup>13</sup>C NMR (CD<sub>3</sub>OD, 101 MHz):  $\delta$  25.3, 28.0, 28.3, 28.4, 34.0, 35.1, 39.7, 41.7, 51.2, 51.6, 52.2, 53.4, 55.6, 60.2, 61.9, 107.7, 121.0, 121.9, 127.0, 129.7, 136.7, 149.4, 162.9, 164.7, 174.7; HRMS (ESI<sup>+</sup>)  $m/z$  669.2243 ([M + Na]<sup>+</sup> C<sub>28</sub>H<sub>38</sub>N<sub>8</sub>NaO<sub>6</sub>S<sup>+</sup> requires 669.2253).

2-(6-(Diethylamino)-3-(diethyliminio)-3*H*-xanthen-9-yl)-5-(*N*-((1-(3-oxo-3-(4-(2-(phenoxy)sulfonyl)ethyl)piperazin-1-yl)prop-1-en-2-yl)-1*H*-1,2,3-triazol-4-yl)methyl)sulfamoyl)benzenesulfonate (**10j**)

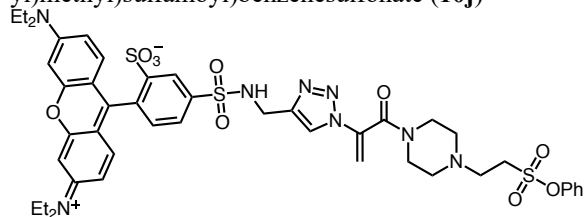

red solid; TLC  $R_f$  0.48 ( $\text{CH}_2\text{Cl}_2/\text{MeOH} = 10/1$ );  $^1\text{H}$  NMR ( $\text{DMSO-}d_6$ , 400 MHz):  $\delta$  1.21 (t, 12H,  $J = 7.0$  Hz), 2.36–2.44 (br, 2H), 2.48–2.54 (m, 2H), 2.86–2.91 (m, 2H), 3.52–3.77 (m, 12H), 4.25 (d, 2H,  $J = 6.0$  Hz), 5.44 (d, 2H,  $J = 2.4$  Hz), 6.06 (d, 2H,  $J = 2.4$  Hz), 6.92–7.09 (m, 5H), 7.33–7.41 (m, 3H), 7.42–7.53 (m, 3H), 7.89–8.00 (m, 1H), 8.47–8.49 (m, 2H), 8.59 (t, 2H,  $J = 6.0$  Hz);  $^{13}\text{C}$  NMR ( $\text{DMSO-}d_6$ , 101 MHz):  $\delta$  12.9, 38.4, 41.8 (br), 45.7, 46.9 (br), 47.8, 51.4, 51.9 (br), 52.4 (br), 95.8, 108.5, 113.9, 114.1, 122.1, 122.7, 126.3, 127.2, 127.8, 130.6, 131.1, 133.2, 133.6, 136.5, 141.8, 144.5, 148.4, 149.3, 155.5, 157.6, 157.9, 162.2; HRMS ( $\text{ESI}^+$ )  $m/z$  961.3042 ( $[\text{M} + \text{H}]^+$   $\text{C}_{45}\text{H}_{53}\text{N}_8\text{O}_{10}\text{S}_3^+$  requires 961.3041).

Phenyl 2-(4-(2-((5*aR*,6*R*,6*aS*)-6-(hydroxymethyl)-5,5*a*,6,6*a*,7,8-hexahydrocyclopropa[5,6]cycloocta[1,2-*d*][1,2,3]triazol-1(4*H*)-yl)acryloyl)piperazin-1-yl)ethane-1-sulfonate (**10k**)

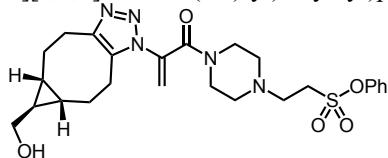

Colorless solid; TLC  $R_f$  0.38 ( $\text{CH}_2\text{Cl}_2/\text{MeOH} = 15/1$ );  $^1\text{H}$  NMR ( $\text{CDCl}_3$ , 400 MHz):  $\delta$  0.71–0.91 (m, 3H), 1.32–1.42 (m, 2H), 2.37–2.58 (m, 6H), 2.61–2.71 (m, 1H), 2.83–2.97 (m, 4H), 3.08–3.18 (m, 1H), 3.41–3.58 (m, 6H), 3.61–3.79 (br, 2H), 5.81 (d, 1H,  $J = 1.2$  Hz), 5.84 (d, 1H,  $J = 1.2$  Hz), 7.23–7.58 (m, 5H);  $^{13}\text{C}$  NMR ( $\text{CDCl}_3$ , 101 MHz):  $\delta$  22.1, 22.3, 22.9, 25.6, 26.9, 27.5, 27.9, 42.2 (br), 46.5 (br), 47.9, 51.5, 52.2 (br), 52.8 (br), 66.3, 119.1, 122.0, 127.5, 130.1, 135.0, 137.3, 145.5, 149.0, 163.5; IR ( $\text{NaCl}$ ,  $\text{cm}^{-1}$ ) 865, 1027, 1144, 1367, 1442, 1634, 2926, 3401; HRMS ( $\text{ESI}^+$ )  $m/z$  538.2100 ( $[\text{M} + \text{Na}]^+$   $\text{C}_{25}\text{H}_{33}\text{N}_5\text{NaO}_5\text{S}^+$  requires 538.2100).

Phenyl 2-(4-(3-((4-methoxyphenyl)thio)-2-(4-(*p*-tolyl)-1*H*-1,2,3-triazol-1-yl)propanoyl)piperazin-1-yl)ethane-1-sulfonate (**5b**)

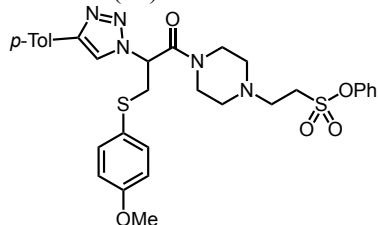

Colorless solid; TLC  $R_f$  0.48 ( $\text{CH}_2\text{Cl}_2/\text{MeOH} = 20/1$ );  $^1\text{H}$  NMR ( $\text{CDCl}_3$ , 400 MHz):  $\delta$  2.10–2.18 (m, 1H), 2.31–2.37 (m, 1H), 2.40 (s, 3H), 2.49–2.60 (m, 2H), 2.92–2.97 (m, 2H), 3.37–3.44 (m, 3H), 3.45–3.54 (m, 2H), 3.55–3.63 (m, 2H), 3.74 (s, 3H), 3.76–3.83 (m, 1H), 5.77 (dd, 1H,  $J = 7.3, 7.3$  Hz), 6.82–6.87 (m, 2H), 7.23–7.29 (m, 4H), 7.31–7.46 (m, 5H), 7.69 (d, 2H,  $J = 8.1$  Hz), 7.90 (s, 1H);  $^{13}\text{C}$  NMR ( $\text{CDCl}_3$ , 101 MHz):  $\delta$  21.4, 39.0, 42.4, 45.7, 47.9, 51.4, 52.2, 52.8, 55.3, 58.3, 115.0, 117.9, 122.0, 123.5, 125.6, 127.3, 127.5, 129.5, 130.1, 134.7, 138.2, 148.3, 149.0, 159.8, 165.1; IR ( $\text{NaCl}$ ,  $\text{cm}^{-1}$ ) 865, 1144, 1246, 1367, 1493, 1651, 1656, 2835, 2927, 2939; HRMS ( $\text{ESI}^+$ )  $m/z$  622.2151 ( $[\text{M} + \text{H}]^+$   $\text{C}_{31}\text{H}_{36}\text{N}_5\text{O}_5\text{S}_2^+$  requires 622.2152).

Methyl *N*-(*tert*-butoxycarbonyl)-*S*-(3-oxo-3-(4-(2-(phenoxy)sulfonyl)ethyl)piperazin-1-yl)-2-(4-(*p*-tolyl)-1*H*-1,2,3-triazol-1-yl)propyl)-*L*-cysteinate (**5c**)

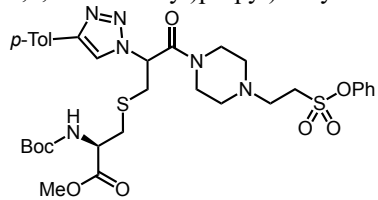

Colorless oil; TLC  $R_f$  0.32 ( $\text{CH}_2\text{Cl}_2/\text{MeOH} = 15/1$ );  $^1\text{H}$  and  $^{13}\text{C}$  NMR analysis show the presence of diastereomers and rotational isomers.  $^1\text{H}$  NMR ( $\text{CDCl}_3$ , 400 MHz):  $\delta$  1.45 (s, 9H), 2.12–2.22 (m, 1H), 2.33–2.43 (m, 4H), 2.54–

2.64 (m, 2H), 2.90–3.18 (m, 4H), 3.38–3.47 (m, 3H), 3.49–3.85 (m, 7H), 4.51–4.60 (m, 1H), 5.32–5.43 (m, 1H), 5.86–5.97 (m, 1H), 7.24–7.45 (m, 7H), 7.71–7.79 (m, 2H), 7.96 (s, 1H);  $^{13}\text{C}$  NMR ( $\text{CDCl}_3$ , 101 MHz):  $\delta$  21.3, 28.29, 28.32, 35.3, 35.5, 42.6, 45.9, 47.9, 51.4, 52.2, 52.8, 52.9, 53.3, 58.7 (br), 80.4, 117.6, 122.0, 125.6, 127.3, 127.4, 129.6, 130.1, 138.4, 148.5, 149.0, 164.9 (br), 171.2; IR ( $\text{NaCl}$ ,  $\text{cm}^{-1}$ ) 865, 1040, 1144, 1167, 1193, 1241, 1264, 1366, 1455, 1651, 1665, 2926; HRMS ( $\text{ESI}^+$ )  $m/z$  739.2556 ( $[\text{M} + \text{Na}]^+$   $\text{C}_{33}\text{H}_{44}\text{N}_6\text{NaO}_8\text{S}_2^+$  requires 739.2560).

Phenyl 2-(4-(3-((2-((5-(dimethylamino)naphthalene)-1-sulfonamido)ethyl)thio)-2-(4-(*p*-tolyl)-1*H*-1,2,3-triazol-1-yl)propanoyl)piperazin-1-yl)ethane-1-sulfonate (**5d**)

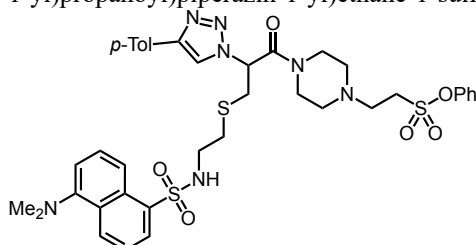

Pale yellow oil; TLC  $R_f$  0.42 ( $\text{CH}_2\text{Cl}_2/\text{MeOH} = 15/1$ );  $^1\text{H}$  NMR ( $\text{CDCl}_3$ , 400 MHz):  $\delta$  2.19–2.25 (m, 1H), 2.37–2.44 (m, 4H), 2.52–2.63 (m, 3H), 2.71–2.80 (m, 1H), 2.88 (s, 6H), 2.92–3.05 (m, 4H), 3.12–3.26 (m, 2H), 3.40 (t, 2H  $J = 7.4$  Hz), 3.56–3.77 (m, 4H), 5.93–6.04 (m, 2H), 7.20 (d, 1H,  $J = 7.5$  Hz), 7.26 (d, 1H,  $J = 7.5$  Hz), 7.26–7.34 (m, 1H), 7.38–7.43 (m, 2H), 7.38–7.45 (m, 2H), 7.74 (d, 2H  $J = 8.1$  Hz), 7.95 (s, 1H), 8.24–8.28 (m, 2H), 8.35 (d, 2H  $J = 8.5$  Hz), 8.55 (d, 2H  $J = 8.5$  Hz);  $^{13}\text{C}$  NMR ( $\text{CDCl}_3$ , 101 MHz):  $\delta$  21.3, 33.6, 34.9, 42.6, 42.8, 45.4, 45.9, 47.9, 51.4, 52.3, 52.7, 58.8, 115.3, 117.8, 118.7, 122.0, 123.2, 125.6, 127.2, 127.4, 128.7, 129.5, 129.56, 129.61, 129.9, 130.1, 130.7, 134.5, 138.4, 148.5, 149.0, 152.0, 165.0; IR ( $\text{NaCl}$ ,  $\text{cm}^{-1}$ ) 867, 1144, 1163, 1266, 1369, 1654; HRMS ( $\text{ESI}^+$ )  $m/z$  814.2493 ( $[\text{M} + \text{Na}]^+$   $\text{C}_{38}\text{H}_{45}\text{N}_7\text{NaO}_6\text{S}_3^+$  requires 814.2491).

Methyl *N*-(3-oxo-3-(4-(2-(phenoxysulfonyl)ethyl)piperazin-1-yl)-2-(4-(*p*-tolyl)-1*H*-1,2,3-triazol-1-yl)propyl)-L-lysinate (**5e**)

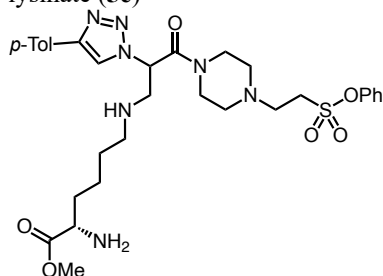

Pale yellow oil; TLC  $R_f$  0.48 ( $\text{CH}_2\text{Cl}_2/\text{MeOH} = 10/1$ );  $^1\text{H}$  NMR ( $\text{CDCl}_3$ , 400 MHz):  $\delta$  1.35–1.56 (m, 5H), 1.68–1.77 (m, 1H), 2.12–2.18 (m, 1H), 2.32–2.42 (m, 4H), 2.53–2.72 (m, 4H), 2.91–2.98 (m, 2H), 3.13–3.20 (m, 1H), 3.36–3.85 (m, 11H), 5.85 (dd, 1H,  $J = 6.8, 6.8$  Hz), 7.23–7.28 (m, 4H), 7.31–7.36 (m, 1H), 7.39–7.45 (m, 2H), 7.74 (d, 2H,  $J = 8.1$  Hz), 8.01 (s, 1H);  $^{13}\text{C}$  NMR ( $\text{CDCl}_3$ , 101 MHz):  $\delta$  21.3, 23.2, 29.7, 34.6, 42.3, 45.7, 47.9, 49.4, 51.4, 51.7, 52.0, 52.3, 52.8, 54.3, 59.1, 118.2, 122.0, 125.6, 127.40, 127.42, 129.6, 130.1, 138.3, 148.3, 149.0, 165.4, 176.5; IR ( $\text{NaCl}$ ,  $\text{cm}^{-1}$ ) 865, 1144, 1367, 1456, 1488, 1651, 1732, 2930; HRMS ( $\text{ESI}^+$ )  $m/z$  642.3067 ( $[\text{M} + \text{H}]^+$   $\text{C}_{31}\text{H}_{44}\text{N}_7\text{O}_6\text{S}^+$  requires 642.3068).

Phenyl 2-(4-(3-(6-amino-9*H*-purin-9-yl)-2-(4-(*p*-tolyl)-1*H*-1,2,3-triazol-1-yl)propanoyl)piperazin-1-yl)ethane-1-sulfonate (**5f**)

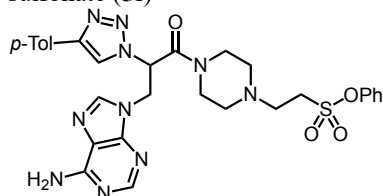

Colorless solid; TLC  $R_f$  0.32 ( $\text{CH}_2\text{Cl}_2/\text{MeOH} = 15/1$ );  $^1\text{H}$  NMR ( $\text{CDCl}_3$ , 400 MHz):  $\delta$  2.08–2.15 (m, 1H), 2.20–2.28 (m, 1H), 2.37–2.45 (m, 5H), 2.87–2.94 (m, 2H), 3.34–3.39 (m, 2H), 3.48–3.64 (m, 3H), 3.65–3.74 (m, 1H), 4.81 (dd, 1H  $J = 6.9, 6.9$  Hz), 5.00 (dd, 1H,  $J = 7.7, 7.7$  Hz), 5.78–5.84 (br, 2H), 6.39–6.45 (m, 1H), 7.23–7.28 (m, 4H), 7.30–7.36 (m, 1H), 7.38–7.45 (m, 2H), 7.57 (s, 1H), 7.72 (d, 2H  $J = 8.1$  Hz), 8.05 (s, 1H), 8.39 (s, 1H);  $^{13}\text{C}$  NMR ( $\text{CDCl}_3$ , 101 MHz):  $\delta$  21.4, 42.5, 45.7, 45.9, 47.7, 51.3, 52.1, 52.4, 57.5, 117.7, 119.5, 122.0, 125.7,

126.9, 127.5, 130.0, 130.1, 138.7, 140.7, 148.9, 149.0, 150.1, 153.4, 155.5, 163.6; IR (NaCl,  $\text{cm}^{-1}$ ) 865, 1144, 1366, 1470, 1595, 1651, 1656;  $^6$ ; HRMS (ESI<sup>+</sup>)  $m/z$  639.2221 ([M + Na]<sup>+</sup> C<sub>29</sub>H<sub>32</sub>N<sub>10</sub>NaO<sub>4</sub>S<sup>+</sup> requires 639.2226).

Phenyl 2-(4-(3-(6-amino-2-oxopyrazin-1(2H)-yl)-2-(4-(*p*-tolyl)-1H-1,2,3-triazol-1-yl)propanoyl)piperazin-1-yl)ethane-1-sulfonate (**5g**)

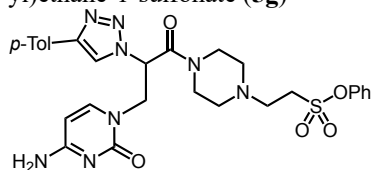

Colorless solid; TLC  $R_f$  0.31 (CH<sub>2</sub>Cl<sub>2</sub>/MeOH = 15/1); <sup>1</sup>H NMR (CDCl<sub>3</sub>, 400 MHz):  $\delta$  2.25–2.52 (m, 7H), 2.94 (t, 2H,  $J$  = 7.0 Hz), 3.41 (t, 2H,  $J$  = 7.3 Hz), 3.53–3.79 (m, 4H), 4.14–4.23 (m, 1H), 4.54 (dd, 1H,  $J$  = 13.7, 5.5 Hz), 5.57 (d, 1H,  $J$  = 7.2 Hz), 6.31 (dd, 1H,  $J$  = 8.4, 5.5 Hz), 6.99 (d, 1H,  $J$  = 7.3 Hz), 7.21–7.34 (m, 5H), 7.38–7.43 (m, 2H), 7.71 (d, 2H,  $J$  = 8.1 Hz), 8.17 (s, 1H); <sup>13</sup>C NMR (CDCl<sub>3</sub>, 101 MHz):  $\delta$  21.3, 42.4, 45.6, 47.8, 51.3, 52.2, 52.5, 52.8, 57.3, 94.7, 119.1, 122.0, 125.6, 127.1, 127.4, 129.6, 130.0, 138.4, 146.0, 148.3, 148.9, 156.6, 164.0, 166.3; IR (NaCl,  $\text{cm}^{-1}$ ) 865, 1144, 1279, 1367, 1488, 1651, 1666; HRMS (ESI<sup>+</sup>)  $m/z$  615.2115 ([M + Na]<sup>+</sup> C<sub>28</sub>H<sub>32</sub>N<sub>8</sub>NaO<sub>5</sub>S<sup>+</sup> requires 615.2114).

Phenyl 2-(4-(3-butoxy-2-(4-(*p*-tolyl)-1H-1,2,3-triazol-1-yl)propanoyl)piperazin-1-yl)ethane-1-sulfonate (**5h**)

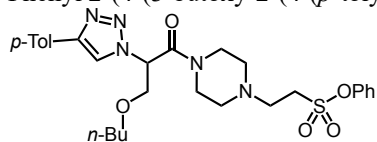

Colorless solid; TLC  $R_f$  0.43 (CH<sub>2</sub>Cl<sub>2</sub>/MeOH = 15/1); <sup>1</sup>H NMR (CDCl<sub>3</sub>, 400 MHz):  $\delta$  0.89 (t, 3H,  $J$  = 7.4 Hz), 1.25–1.34 (m, 2H), 1.47–1.55 (m, 2H), 2.29–2.36 (m, 1H), 2.37–2.46 (m, 4H), 2.53–2.61 (m, 2H), 2.95–3.11 (m, 2H), 3.40–3.54 (m, 4H), 3.57–3.80 (m, 4H), 3.94 (dd, 1H,  $J$  = 9.7, 6.9 Hz), 4.08 (dd, 1H,  $J$  = 9.7, 6.9 Hz), 5.95 (dd, 1H,  $J$  = 6.9, 6.9 Hz), 7.23–7.30 (m, 4H), 7.32–7.37 (m, 1H), 7.41–7.46 (m, 2H), 7.73–7.76 (m, 2H), 8.09 (s, 1H); <sup>13</sup>C NMR (CDCl<sub>3</sub>, 101 MHz):  $\delta$  13.9, 19.2, 21.3, 31.4, 42.3, 45.9, 47.9, 51.4, 52.3, 52.8, 58.5, 70.7, 71.7, 118.7, 122.0, 125.6, 127.5, 127.6, 130.0, 130.1, 138.2, 148.1, 149.0, 165.0; IR (NaCl,  $\text{cm}^{-1}$ ) 867, 1127, 1144, 1169, 1266, 1370, 1488, 1655; HRMS (ESI<sup>+</sup>)  $m/z$  578.2411 ([M + Na]<sup>+</sup> C<sub>28</sub>H<sub>37</sub>N<sub>5</sub>NaO<sub>5</sub>S<sup>+</sup> requires 578.2413).

Diethyl 2-(3-oxo-3-(4-(2-(phenoxysulfonyl)ethyl)piperazin-1-yl)-2-(4-(*p*-tolyl)-1H-1,2,3-triazol-1-yl)propyl)malonate (**5i**)

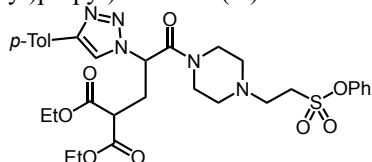

Colorless solid; TLC  $R_f$  0.61 (CH<sub>2</sub>Cl<sub>2</sub>/MeOH = 15/1); <sup>1</sup>H NMR (CDCl<sub>3</sub>, 400 MHz):  $\delta$  1.25 (t, 3H,  $J$  = 7.1 Hz), 1.30 (t, 3H,  $J$  = 7.1 Hz), 2.34–2.48 (m, 5H), 2.52–2.65 (m, 3H), 2.68–2.78 (m, 1H), 2.99 (t, 2H,  $J$  = 7.3 Hz), 3.09 (dd, 1H,  $J$  = 9.7, 5.0 Hz), 3.39–3.47 (m, 2H), 3.58–3.67 (m, 1H), 3.68–3.76 (m, 3H), 4.12–4.29 (m, 4H), 5.95 (dd, 1H,  $J$  = 10.3, 5.5 Hz), 7.24–7.30 (m, 4H), 7.33–7.37 (m, 1H), 7.41–7.46 (m, 2H), 7.73–7.76 (m, 2H), 8.12 (s, 1H); <sup>13</sup>C NMR (CDCl<sub>3</sub>, 101 MHz):  $\delta$  13.99, 14.01, 21.3, 32.1, 42.4, 45.7, 47.6, 47.9, 51.4, 52.3, 52.8, 57.3, 62.09, 62.15, 118.3, 122.0, 125.6, 127.4, 129.6, 130.1 (two signals overlapped), 138.3, 148.6, 149.0, 165.5, 168.3, 168.4; IR (NaCl,  $\text{cm}^{-1}$ ) 867, 1146, 1266, 1658, 1730, 1744, 2986, 3055; HRMS (ESI<sup>+</sup>)  $m/z$  664.2418 ([M + Na]<sup>+</sup> C<sub>31</sub>H<sub>39</sub>N<sub>5</sub>NaO<sub>8</sub>S<sup>+</sup> requires 664.2417).

Phenyl 2-(4-(2-(4-(4-((*tert*-butyldimethylsilyl)oxy)phenyl)-1H-1,2,3-triazol-1-yl)acryloyl)piperazin-1-yl)ethane-1-sulfonate (**13a**)

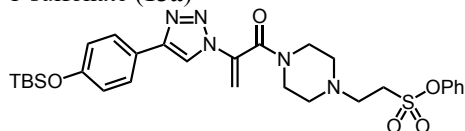

Colorless oil; TLC  $R_f$  0.52 (CH<sub>2</sub>Cl<sub>2</sub>/MeOH = 15/1); <sup>1</sup>H NMR (CDCl<sub>3</sub>, 400 MHz):  $\delta$  0.23 (s, 6H), 1.01 (s, 9H), 2.44–2.64 (br, 4H), 3.01 (t, 2H,  $J$  = 7.3 Hz), 3.44 (t, 2H,  $J$  = 7.3 Hz), 3.48–3.55 (br, 2H), 3.74–3.82 (br, 2H), 5.38 (d, 1H,  $J$  = 2.0 Hz), 5.99 (d, 1H,  $J$  = 2.0 Hz), 6.91 (d, 2H,  $J$  = 8.6 Hz), 7.25–7.44 (m, 5H), 7.73 (d, 2H,  $J$  = 8.6 Hz), 8.02 (s, 1H); <sup>13</sup>C NMR (CDCl<sub>3</sub>, 101 MHz):  $\delta$  -4.4, 18.3, 25.7, 41.9 (br), 47.0 (br), 47.9, 51.5, 52.1 (br), 52.8 (br), 108.1, 117.1, 120.6, 122.0, 123.0, 127.2, 127.5, 130.1, 136.7, 148.1, 149.0, 156.2, 162.6; IR (NaCl,  $\text{cm}^{-1}$ )

864, 911, 1023, 1146, 1269, 1367, 1495, 1562, 1651, 2858, 2931; HRMS (ESI<sup>+</sup>)  $m/z$  620.2337 ([M + Na]<sup>+</sup> C<sub>29</sub>H<sub>39</sub>N<sub>5</sub>NaO<sub>5</sub>SSi<sup>+</sup> requires 620.2339).

Phenyl 2-(4-(2-(4-((2-(2-(4-hydroxybenzamido)ethoxy)ethoxy)methyl)-1*H*-1,2,3-triazol-1-yl)acryloyl)piperazin-1-yl)ethane-1-sulfonate (**13b**)

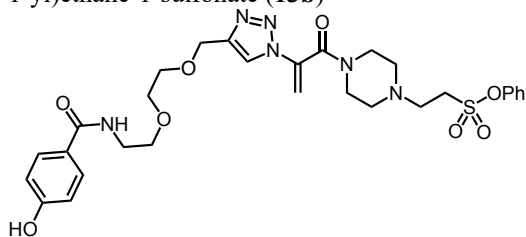

Colorless oil; TLC  $R_f$  0.36 (CH<sub>2</sub>Cl<sub>2</sub>/MeOH = 10/1); <sup>1</sup>H NMR (CDCl<sub>3</sub>, 400 MHz): δ 2.49–2.63 (m, 4H), 3.02 (t, 2H,  $J$  = 7.3 Hz), 3.46 (t, 2H,  $J$  = 7.3 Hz), 3.50–3.56 (m, 2H), 3.60–3.82 (m, 10H), 4.70 (s, 2H), 5.33 (d, 1H,  $J$  = 2.4 Hz), 5.78 (d, 1H,  $J$  = 2.4 Hz), 6.69 (d, 2H,  $J$  = 8.5 Hz), 6.84–6.89 (m, 1H), 7.26–7.31 (m, 2H), 7.32–7.36 (m, 1H), 7.40–7.46 (m, 2H), 7.54–7.58 (m, 2H), 7.84 (s, 1H); <sup>13</sup>C NMR (CDCl<sub>3</sub>, 101 MHz): δ 39.5, 42.1 (br), 47.2 (br), 47.9, 51.4, 52.0 (br), 52.7 (br), 64.4, 69.5, 70.1, 70.2, 107.8, 115.3, 120.9, 122.0, 125.5, 127.5 (two signals overlapped), 128.9, 130.1, 136.3, 149.0, 160.0, 162.7, 167.5; IR (NaCl, cm<sup>-1</sup>) 867, 1104, 1144, 1171, 1233, 1267, 1367, 1445, 1488, 1505, 1632; HRMS (ESI<sup>+</sup>)  $m/z$  651.2216 ([M + Na]<sup>+</sup> C<sub>29</sub>H<sub>36</sub>N<sub>6</sub>NaO<sub>8</sub>S<sup>+</sup> requires 651.2213).

Phenyl 2-(4-(2-(4-((8*S*,9*R*,13*R*,14*R*,17*S*)-3,17-dihydroxy-13-methyl-7,8,9,11,12,13,14,15,16,17-decahydro-6*H*-cyclopenta[*a*]phenanthren-17-yl)-1*H*-1,2,3-triazol-1-yl)acryloyl)piperazin-1-yl)ethane-1-sulfonate (**13c**)

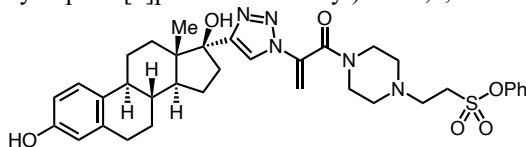

Colorless solid; TLC  $R_f$  0.42 (CH<sub>2</sub>Cl<sub>2</sub>/MeOH = 10/1); <sup>1</sup>H NMR (CDCl<sub>3</sub>, 400 MHz): δ 0.63 (ddd, 1H,  $J$  = 12.7, 12.7, 4.0 Hz), 1.02 (s, 3H), 1.21–1.56 (m, 4H), 1.68–1.85 (m, 3H), 1.87–2.09 (m, 3H), 2.23–2.41 (m, 2H), 2.56 (m, 4H), 2.86–2.93 (m, 2H), 3.02 (t, 2H,  $J$  = 7.4 Hz), 3.45 (t, 2H,  $J$  = 7.4 Hz), 3.60–3.71 (br, 4H), 5.37 (d, 1H,  $J$  = 2.2 Hz), 5.93 (d, 1H,  $J$  = 2.2 Hz), 6.32 (br s, 1H), 6.48 (d, 1H,  $J$  = 2.5 Hz), 6.55 (dd, 1H,  $J$  = 8.4, 2.5 Hz), 6.96 (d, 1H,  $J$  = 8.4 Hz), 7.23–7.31 (m, 2H), 7.31–7.37 (m, 1H), 7.41–7.46 (m, 2H), 7.80 (s, 1H); <sup>13</sup>C NMR (CDCl<sub>3</sub>, 101 MHz): δ 14.2, 23.5, 26.1, 27.3, 29.6, 32.9, 38.1, 39.3, 42.1 (br), 43.0, 47.2 (br), 47.4, 48.0, 48.4, 51.5, 52.1 (br), 52.8 (br), 82.6, 107.9, 112.7, 115.2, 119.9, 122.0, 126.3, 127.5, 130.1, 132.1, 136.6, 138.0, 149.0, 153.8, 154.3, 162.8; IR (NaCl, cm<sup>-1</sup>) 867, 1023, 1144, 1231, 1286, 1360, 1446, 1455, 1634, 2931; HRMS (ESI<sup>+</sup>)  $m/z$  684.2835 ([M + Na]<sup>+</sup> C<sub>35</sub>H<sub>43</sub>N<sub>5</sub>NaO<sub>6</sub>S<sup>+</sup> requires 684.2832).

Phenyl 2-(4-(2-(4-(4-((*tert*-butyldimethylsilyl)oxy)phenyl)-1*H*-1,2,3-triazol-1-yl)-3-(dodecylthio)propanoyl)piperazin-1-yl)ethane-1-sulfonate (**S3**)

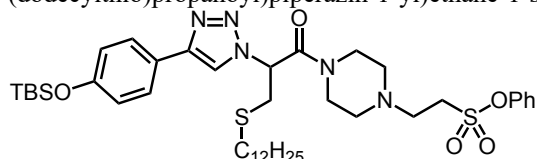

Colorless solid; TLC  $R_f$  0.54 (CH<sub>2</sub>Cl<sub>2</sub>/MeOH = 15/1); <sup>1</sup>H NMR (CDCl<sub>3</sub>, 400 MHz): δ 0.23 (s, 6H), 0.91 (t, 3H,  $J$  = 6.9 Hz), 1.01 (s, 9H), 1.24–1.38 (m, 18H), 1.52–1.61 (m, 2H), 2.20–2.28 (m, 1H), 2.37–2.44 (m, 1H), 2.47–2.65 (m, 4H), 2.92–3.01 (m, 2H), 3.06 (dd, 1H,  $J$  = 13.6, 6.2 Hz), 3.37–3.44 (m, 3H), 3.55–3.84 (m, 4H), 5.86 (dd, 1H,  $J$  = 8.6, 6.2 Hz), 6.87–6.93 (AA'BB', 2H), 7.26–7.46 (m, 5H), 7.69–7.75 (AA'BB', 2H), 7.96 (s, 1H); <sup>13</sup>C NMR (CDCl<sub>3</sub>, 101 MHz): δ -4.4, 14.2, 18.3, 22.7, 25.7, 28.8, 29.2, 29.4, 29.5, 29.60 (two signals overlapped), 29.65, 29.67, 31.9, 33.0, 34.7, 42.5, 45.9, 48.0, 51.4, 52.3, 52.9, 58.8, 117.4, 120.6, 122.0, 123.5, 127.0, 127.4, 130.1, 148.3, 149.0, 156.0, 165.3; IR (NaCl, cm<sup>-1</sup>) 864, 912, 1146, 1264, 1367, 1469, 1493, 1651, 2856, 2927, 2953; HRMS (ESI<sup>+</sup>)  $m/z$  822.4091 ([M + Na]<sup>+</sup> C<sub>41</sub>H<sub>65</sub>N<sub>5</sub>NaO<sub>5</sub>S<sub>2</sub>Si<sup>+</sup> requires 822.4094).

4-(1-(3-(Dodecylthio)-1-oxo-1-(4-(2-(phenoxy sulfonyl)ethyl)piperazin-1-yl)propan-2-yl)-1*H*-1,2,3-triazol-4-yl)phenyl 2-(4-(2-azidoacryloyl)piperazin-1-yl)ethane-1-sulfonate (**14**)

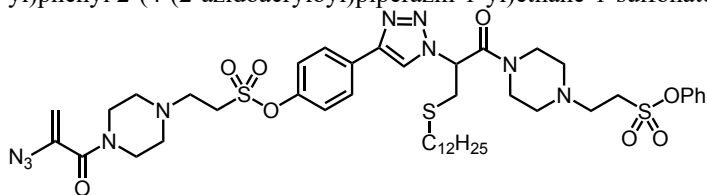

Pale yellow oil; TLC  $R_f$  0.48 ( $\text{CH}_2\text{Cl}_2/\text{MeOH} = 10/1$ );  $^1\text{H}$  NMR ( $\text{CDCl}_3$ , 400 MHz):  $\delta$  0.88 (t, 3H,  $J = 6.8$  Hz), 1.22–1.37 (m, 18H), 1.52–1.60 (m, 2H), 2.26–2.34 (m, 1H), 2.37–2.44 (m, 1H), 2.47–2.65 (m, 8H), 2.93–3.11 (m, 5H), 3.33–3.48 (m, 5H), 3.56–3.79 (m, 8H), 5.04 (d, 1H,  $J = 2.1$  Hz), 5.09 (d, 1H,  $J = 2.1$  Hz), 5.89 (dd, 1H,  $J = 8.4$ , 6.4 Hz), 7.23–7.29 (m, 2H), 7.31–7.44 (m, 3H), 7.46–7.54 (m, 2H), 7.68–7.72 (m, 2H), 8.12 (s, 1H);  $^{13}\text{C}$  NMR ( $\text{CDCl}_3$ , 101 MHz):  $\delta$  14.2, 22.7, 28.8, 29.2, 29.4, 29.5, 29.57, 29.59, 29.63, 29.64, 31.9, 33.0, 34.8, 41.9 (br), 42.5, 46.0, 47.1 (br), 48.0, 51.4, 51.5, 52.2, 52.3 (br), 52.7 (br), 52.8, 53.5, 58.7, 104.0, 118.8, 122.0, 122.5, 127.3, 127.4, 129.7, 130.1, 139.5, 146.8, 148.7, 148.9, 163.3, 165.2; IR (NaCl,  $\text{cm}^{-1}$ ) 867, 1041, 1148, 1370, 1465, 1498, 1651, 2854, 2926, 3289; HRMS (ESI $^+$ )  $m/z$  979.3964 ( $[\text{M} + \text{Na}]^+$   $\text{C}_{44}\text{H}_{64}\text{N}_{10}\text{NaO}_8\text{S}_3^+$  requires 979.3968); ; HPLC analysis:  $R_t = 35.2$  min [column: Shiseido CAPCELL PAK MG II (4.6 mm i.d.  $\times$  250 mm); mobile phase: MeOH:H $_2$ O = 40:60 (0–5 min), linear gradient from 40:60 to 99:1 (5–30 min), 99:1 (30–50 min); flow rate: 1.00 mL/min; detection: UV at 254 nm].

2-(4-(3-(Dodecylthio)-2-(4-(*p*-tolyl)-1*H*-1,2,3-triazol-1-yl)propanoyl)piperazin-1-yl)ethane-1-sulfonyl fluoride (**S7**)

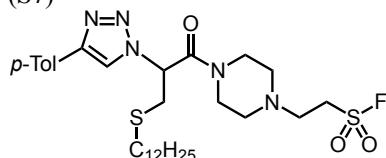

Colorless oil; TLC  $R_f$  0.48 ( $\text{CH}_2\text{Cl}_2/\text{MeOH} = 20/1$ );  $^1\text{H}$  NMR ( $\text{CDCl}_3$ , 400 MHz):  $\delta$  0.90 (t, 3H,  $J = 6.9$  Hz), 1.21–1.39 (m, 18H), 1.52–1.62 (m, 2H), 2.19–2.26 (m, 1H), 2.38–2.44 (m, 4H), 2.47–2.58 (m, 2H), 2.59–2.68 (m, 2H), 2.93 (t, 2H,  $J = 6.8$  Hz), 3.07 (dd, 1H,  $J = 13.6$ , 6.0 Hz), 3.43 (dd, 1H,  $J = 13.6$ , 8.7 Hz), 3.52–5.60 (m, 3H), 3.65–3.73 (m, 1H), 3.75–3.91 (m, 2H), 5.87 (dd, 1H,  $J = 8.7$ , 6.0 Hz), 7.26 (d, 2H,  $J = 7.9$  Hz), 7.74 (d, 2H,  $J = 8.1$  Hz), 8.02 (s, 1H);  $^{13}\text{C}$  NMR ( $\text{CDCl}_3$ , 101 MHz):  $\delta$  14.2, 21.3, 22.7, 28.8, 29.2, 29.4, 29.5, 29.6, 29.66, 29.67, 31.9, 33.0, 34.6, 42.5, 45.9, 48.8 (d,  $J = 17.9$  Hz), 51.0, 52.1, 52.6, 58.8, 117.8, 125.6, 127.3, 129.6, 121.6, 138.3, 148.4, 165.3;  $^{19}\text{F}$  NMR ( $\text{CDCl}_3$ , 376 MHz):  $\delta$  59.0 (1F, s); IR (NaCl,  $\text{cm}^{-1}$ ) 1199, 1409, 1463, 1651, 1656, 2853, 2924; HRMS (ESI $^+$ )  $m/z$  610.3254 ( $[\text{M} + \text{H}]^+$   $\text{C}_{30}\text{H}_{49}\text{FN}_5\text{O}_3\text{S}_2^+$  requires 610.3255).

4-Ethynylphenyl 2-(4-(3-(dodecylthio)-2-(4-(*p*-tolyl)-1*H*-1,2,3-triazol-1-yl)propanoyl)piperazin-1-yl)ethane-1-sulfonate (**S8**)

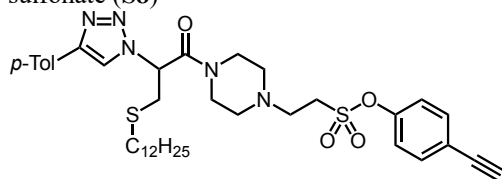

Pale yellow oil; TLC  $R_f$  0.67 ( $\text{CH}_2\text{Cl}_2/\text{MeOH} = 20/1$ );  $^1\text{H}$  NMR ( $\text{CDCl}_3$ , 400 MHz):  $\delta$  0.89 (t, 3H,  $J = 6.8$  Hz), 1.21–1.38 (m, 18H), 1.52–1.60 (m, 2H), 2.18–2.25 (m, 1H), 2.34–2.42 (m, 4H), 2.45–2.65 (m, 4H), 2.93–2.97 (m, 2H), 3.07 (dd, 1H,  $J = 13.5$ , 6.2 Hz), 3.14 (s, 1H), 3.52–3.44 (m, 4H), 3.63–3.84 (m, 3H), 5.87 (dd, 1H,  $J = 8.6$ , 6.2 Hz), 7.20–7.27 (m, 4H), 7.53 (d, 2H,  $J = 8.6$  Hz), 7.74 (d, 2H,  $J = 8.1$  Hz), 8.03 (s, 1H);  $^{13}\text{C}$  NMR ( $\text{CDCl}_3$ , 101 MHz):  $\delta$  14.2, 21.3, 22.7, 28.8, 29.2, 29.4, 29.5, 29.60, 29.65 (two signals overlapped), 29.67, 31.9, 33.0, 34.7, 42.5, 45.9, 48.2, 51.4, 52.2, 52.8, 58.9, 78.6, 82.1, 117.8, 121.6, 122.1, 125.6, 127.4, 129.6, 133.9, 138.3, 148.4, 148.8, 165.3; HRMS (ESI $^+$ )  $m/z$  708.3610 ( $[\text{M} + \text{H}]^+$   $\text{C}_{38}\text{H}_{54}\text{N}_5\text{O}_4\text{S}_2^+$  requires 708.3612).

4-(1-(3-(4-(2-(Fluorosulfonyl)ethyl)piperazin-1-yl)-3-oxoprop-1-en-2-yl)-1*H*-1,2,3-triazol-4-yl)phenyl 2-(4-(3-(dodecylthio)-2-(4-(*p*-tolyl)-1*H*-1,2,3-triazol-1-yl)propanoyl)piperazin-1-yl)ethane-1-sulfonate (**15**)

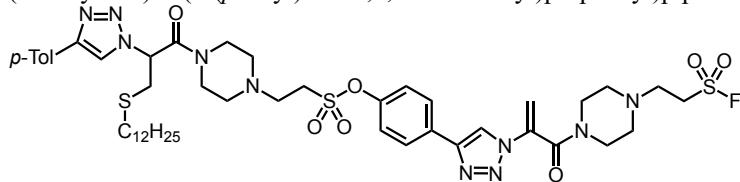

Colorless oil; TLC  $R_f$  0.56 ( $\text{CH}_2\text{Cl}_2/\text{MeOH} = 20/1$ );  $^1\text{H}$  NMR ( $\text{CDCl}_3$ , 400 MHz):  $\delta$  0.89 (t, 3H,  $J = 6.8$  Hz), 1.20–1.38 (m, 18H), 1.51–1.60 (m, 2H), 2.19–2.26 (m, 1H), 2.35–2.43 (m, 4H), 2.47–2.65 (m, 8H), 2.92–3.02 (m, 4H), 3.07 (dd, 1H,  $J = 11.9, 6.2$  Hz), 3.37–3.47 (m, 3H), 3.54–3.84 (m, 10H), 5.43 (d, 1H,  $J = 2.0$  Hz), 5.86 (dd, 1H,  $J = 8.4, 6.2$  Hz), 6.06 (d, 1H,  $J = 2.0$  Hz), 7.25 (d, 2H,  $J = 8.0$  Hz), 7.34 (d, 2H,  $J = 8.7$  Hz), 7.73 (d, 2H,  $J = 8.0$  Hz), 7.90 (d, 2H,  $J = 8.7$  Hz), 8.02 (s, 1H), 8.14 (s, 1H);  $^{13}\text{C}$  NMR ( $\text{CDCl}_3$ , 101 MHz):  $\delta$  14.2, 21.3, 22.7, 28.8, 29.2, 29.4, 29.5, 29.60, 29.65, 29.66, 31.9, 33.0, 34.7, 42.0, 42.5, 45.9, 47.2, 48.2, 48.9 (d,  $J = 10.2$  Hz), 51.0, 51.4, 52.0, 52.3, 52.7, 52.8, 58.9, 108.9, 117.9, 118.5, 122.6, 125.6, 127.4, 127.5, 129.1, 129.6, 136.3, 138.3, 146.7, 148.4, 148.8, 162.5, 165.2;  $^{19}\text{F}$  NMR ( $\text{CDCl}_3$ , 376 MHz):  $\delta$  59.2 (1F, s); HRMS (ESI $^+$ )  $m/z$  999.4416 ( $[\text{M} + \text{H}]^+$   $\text{C}_{47}\text{H}_{68}\text{FN}_{10}\text{O}_7\text{S}_3^+$  requires 999.4413); HPLC analysis:  $R_t = 35.3$  min [column: Shiseido CAPCELL PAK MG II (4.6 mm i.d.  $\times$  250 mm); mobile phase:  $\text{MeOH}:\text{H}_2\text{O} = 40:60$  (0–5 min), linear gradient from 40:60 to 99:1 (5–30 min), 99:1 (30–50 min); flow rate: 1.00 mL/min; detection: UV at 254 nm].

4-(1-(3-(Dodecylthio)-1-oxo-1-(4-(2-(phenoxy sulfonyl)ethyl)piperazin-1-yl)propan-2-yl)-1*H*-1,2,3-triazol-4-yl)phenyl 2-(4-(2-(4-(4-((*tert*-butyldimethylsilyl)oxy)phenyl)-1*H*-1,2,3-triazol-1-yl)acryloyl)piperazin-1-yl)ethane-1-sulfonate (**S1**)

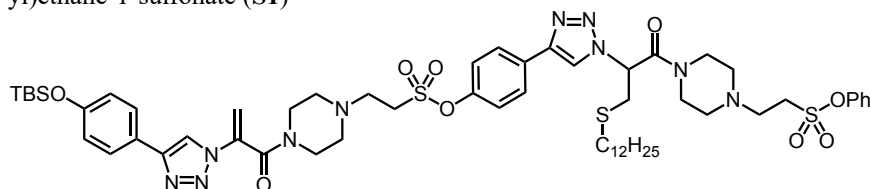

Pale yellow oil; TLC  $R_f$  0.43 ( $\text{CH}_2\text{Cl}_2/\text{MeOH} = 15/1$ );  $^1\text{H}$  NMR ( $\text{CDCl}_3$ , 400 MHz):  $\delta$  0.23 (s, 6H), 0.89 (t, 3H,  $J = 6.8$  Hz), 1.00 (s, 9H), 1.20–1.37 (m, 18H), 1.51–1.61 (m, 2H), 2.26–2.33 (m, 1H), 2.37–2.44 (m, 1H), 2.47–2.65 (m, 8H), 2.94–3.11 (m, 5H), 3.34–3.49 (m, 5H), 3.51–3.82 (m, 8H), 5.39 (d, 1H,  $J = 1.9$  Hz), 5.86–5.92 (m, 1H), 6.00 (d, 1H,  $J = 1.9$  Hz), 6.92 (d, 2H,  $J = 8.5$  Hz), 7.24–7.29 (m, 2H), 7.30–7.37 (m, 3H), 7.38–7.44 (m, 2H), 7.73 (d, 2H,  $J = 8.5$  Hz), 7.89 (d, 2H,  $J = 8.6$  Hz), 8.00 (s, 1H), 8.11 (s, 1H);  $^{13}\text{C}$  NMR ( $\text{CDCl}_3$ , 101 MHz):  $\delta$  -4.4, 14.2, 18.3, 22.7, 25.7, 28.8, 29.2, 29.4, 29.57, 29.60, 29.65, 31.9, 33.0, 34.8, 42.5, 46.0, 47.9, 48.1, 51.4, 51.5, 52.2, 52.8, 58.7, 108.2, 117.1, 118.7, 120.6, 122.0, 122.5, 130.0, 130.1, 136.7, 146.9, 148.1, 148.7, 149.0, 156.2, 162.6, 165.2; HRMS (ESI $^+$ )  $m/z$  1211.5250 ( $[\text{M} + \text{Na}]^+$   $\text{C}_{58}\text{H}_{84}\text{N}_{10}\text{NaO}_9\text{S}_3\text{Si}^+$  requires 1211.5252); HPLC analysis:  $R_t = 38.1$  min [column: Shiseido CAPCELL PAK MG II (4.6 mm i.d.  $\times$  250 mm); mobile phase:  $\text{MeOH}:\text{H}_2\text{O} = 40:60$  (0–5 min), linear gradient from 40:60 to 99:1 (5–30 min), 99:1 (30–50 min); flow rate: 1.00 mL/min; detection: UV at 254 nm].

4-(1-(3-(Dodecylthio)-1-oxo-1-(4-(2-(phenoxy sulfonyl)ethyl)piperazin-1-yl)propan-2-yl)-1*H*-1,2,3-triazol-4-yl)phenyl 2-(4-(2-(4-(4-((*tert*-butyldimethylsilyl)oxy)phenyl)-1*H*-1,2,3-triazol-1-yl)-3-(phenethylthio)propanoyl)piperazin-1-yl)ethane-1-sulfonate (**S4**)

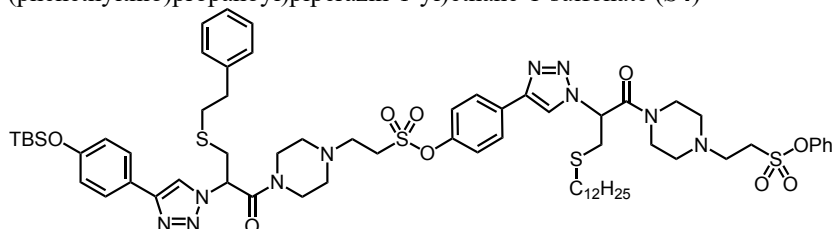

Pale yellow oil; TLC  $R_f$  0.48 ( $\text{CH}_2\text{Cl}_2/\text{MeOH} = 20/1$ );  $^1\text{H}$  NMR ( $\text{CDCl}_3$ , 400 MHz):  $\delta$  0.23 (s, 6H), 0.89 (t, 3H,  $J = 6.9$  Hz), 1.01 (s, 9H), 1.24–1.38 (m, 19H), 1.52–1.61 (m, 2H), 2.18–2.24 (m, 1H), 2.26–2.34 (m, 1H), 2.35–2.45 (m, 2H), 2.49–2.66 (m, 6H), 2.74–2.82 (m, 2H), 2.84–2.90 (m, 2H), 2.91–3.00 (m, 4H), 3.01–3.12 (m, 2H), 3.34–3.44 (m, 5H), 3.53–3.81 (m, 8H), 5.78–5.83 (m, 1H), 5.87–5.93 (m, 1H), 6.90–6.96 (m, 2H), 7.16–7.34 (m, 8H), 7.39–7.44 (m, 4H), 7.71–7.74 (m, 2H), 7.88–7.93 (m, 2H), 7.95 (s, 1H), 8.12 (s, 1H);  $^{13}\text{C}$  NMR analysis shows the presence of diastereomers.  $^{13}\text{C}$  NMR ( $\text{CDCl}_3$ , 101 MHz):  $\delta$  -4.4, 14.2, 18.3, 22.7, 25.7, 28.8, 29.2, 29.4, 29.5, 29.61, 29.65, 31.9, 33.0, 34.4, 34.7, 34.8, 36.1, 42.5, 45.9, 46.0, 47.9, 48.1, 51.27, 51.36, 51.40, 52.2, 52.8, 58.7, 58.9, 117.4, 118.8, 120.6, 122.0, 126.6, 127.0, 127.5, 128.56, 128.58, 129.7, 130.1, 139.8, 146.8, 148.3,

148.7, 149.0, 156.0, 165.15, 165.21; HRMS (ESI<sup>+</sup>)  $m/z$  1349.5756 ([M + Na]<sup>+</sup> C<sub>66</sub>H<sub>94</sub>N<sub>10</sub>NaO<sub>9</sub>S<sub>4</sub>Si<sup>+</sup> requires 1349.5755); HPLC analysis:  $R_t$  = 38.1 min [column: Shiseido CAPCELL PAK MG II (4.6 mm i.d. × 250 mm); mobile phase: MeOH:H<sub>2</sub>O = 40:60 (0–5 min), linear gradient from 40:60 to 99:1 (5–30 min), 99:1 (30–50 min); flow rate: 1.00 mL/min; detection: UV at 254 nm].

4-(1-(1-(4-(2-((4-(1-(3-(Dodecylthio)-1-oxo-1-(4-(2-(phenoxysulfonyl)ethyl)piperazin-1-yl)propan-2-yl)-1H-1,2,3-triazol-4-yl)phenoxy)sulfonyl)ethyl)piperazin-1-yl)-1-oxo-3-(phenethylthio)propan-2-yl)-1H-1,2,3-triazol-4-yl)phenyl 2-(4-(2-azidoacryloyl)piperazin-1-yl)ethane-1-sulfonate (S5)

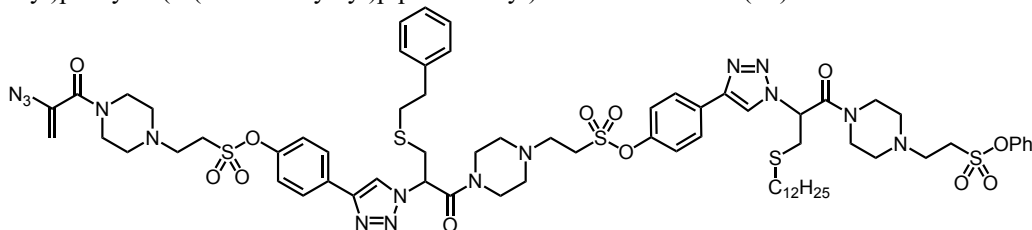

Pale yellow oil; TLC  $R_f$  0.32 (CH<sub>2</sub>Cl<sub>2</sub>/MeOH = 15/1); <sup>1</sup>H NMR (CDCl<sub>3</sub>, 400 MHz): δ 0.89 (t, 3H,  $J$  = 6.9 Hz), 1.22–1.38 (m, 18H), 1.52–1.61 (m, 2H), 2.23–2.33 (m, 2H), 2.36–2.45 (m, 2H), 2.50–2.65 (m, 9H), 2.77–2.83 (m, 2H), 2.86–2.91 (m, 2H), 2.93–3.00 (m, 4H), 3.01–3.11 (m, 5H), 3.34–3.51 (m, 8H), 3.56–3.81 (m, 12H), 5.05 (d, 1H,  $J$  = 2.1 Hz), 5.10 (d, 1H,  $J$  = 2.1 Hz), 5.83–5.92 (m, 2H), 7.16–7.45 (m, 14H), 7.86–7.92 (m, 4H), 8.09 (s, 1H), 8.12 (s, 1H); <sup>13</sup>C NMR analysis shows the presence of diastereomers. <sup>13</sup>C NMR (CDCl<sub>3</sub>, 101 MHz): δ 14.2, 22.7, 28.8, 29.2, 29.4, 29.57, 29.60, 29.65, 29.66, 31.6, 31.9, 33.0, 34.4, 34.8, 34.9, 36.1, 42.5, 46.0, 42.5, 46.0, 47.9, 48.1, 51.36, 51.40, 51.5, 52.2, 52.8, 52.9, 58.69, 58.74, 104.0, 118.8, 122.0, 122.5, 122.6, 126.7, 127.3, 127.5, 128.55, 128.61, 129.67, 129.70, 130.1, 139.4, 139.7, 146.8, 146.9, 148.6, 148.7, 148.9, 163.3, 165.1, 165.2; HRMS (ESI<sup>+</sup>)  $m/z$  742.7937 ([M + 2H]<sup>2+</sup> C<sub>69</sub>H<sub>95</sub>N<sub>15</sub>O<sub>12</sub>S<sub>5</sub><sup>2+</sup> requires 742.7939); HPLC analysis:  $R_t$  = 38.1 min [column: Shiseido CAPCELL PAK MG II (4.6 mm i.d. × 250 mm); mobile phase: MeOH:H<sub>2</sub>O = 40:60 (0–5 min), linear gradient from 40:60 to 99:1 (5–30 min), 99:1 (30–50 min); flow rate: 1.00 mL/min; detection: UV at 254 nm].

4-(1-(1-(4-(2-((4-(1-(3-(Dodecylthio)-1-oxo-1-(4-(2-(phenoxysulfonyl)ethyl)piperazin-1-yl)propan-2-yl)-1H-1,2,3-triazol-4-yl)phenoxy)sulfonyl)ethyl)piperazin-1-yl)-1-oxo-3-(phenethylthio)propan-2-yl)-1H-1,2,3-triazol-4-yl)phenyl 2-(4-(2-(4-(4-(*tert*-butyldimethylsilyl)oxy)phenyl)-1H-1,2,3-triazol-1-yl)acryloyl)piperazin-1-yl)ethane-1-sulfonate (S2)

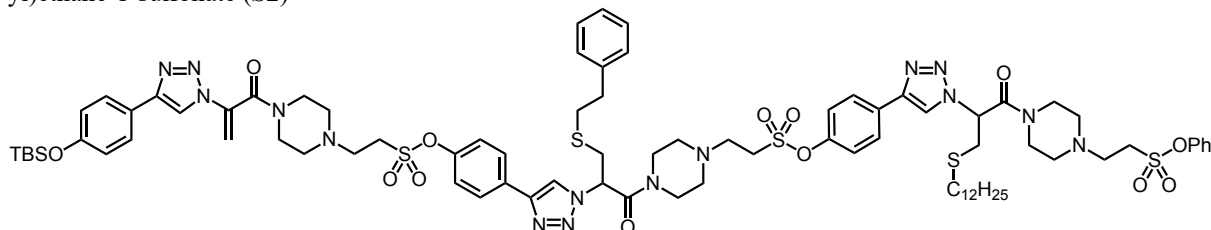

Pale yellow oil; TLC  $R_f$  0.38 (CH<sub>2</sub>Cl<sub>2</sub>/MeOH = 15/1); <sup>1</sup>H NMR (CDCl<sub>3</sub>, 400 MHz): δ 0.23 (s, 6H), 0.89 (t, 3H,  $J$  = 6.8 Hz), 1.01 (s, 9H), 1.22–1.38 (m, 18H), 1.52–1.61 (m, 2H), 2.23–2.33 (m, 2H), 2.36–2.46 (m, 2H), 2.48–2.65 (m, 9H), 2.77–2.83 (m, 2H), 2.84–2.91 (m, 2H), 2.93–3.11 (m, 9H), 3.33–3.50 (m, 8H), 3.51–3.84 (m, 12H), 5.39 (d, 1H,  $J$  = 2.0 Hz), 5.82–5.93 (m, 2H), 6.00 (d, 1H,  $J$  = 2.0 Hz), 6.90–6.94 (m, 2H), 7.17–7.45 (m, 14H), 7.70–7.74 (m, 2H), 7.89 (d, 4H,  $J$  = 8.4 Hz), 7.97 (s, 1H), 8.09 (s, 1H), 8.12 (s, 1H); <sup>13</sup>C NMR analysis shows the presence of diastereomers. <sup>13</sup>C NMR (CDCl<sub>3</sub>, 101 MHz): δ -4.4, 14.2, 18.3, 22.7, 25.7, 28.8, 29.2, 29.4, 29.57, 29.60, 29.65, 29.66, 30.5, 31.9, 33.0, 34.4, 34.8, 34.9, 36.1, 42.0, 42.5, 46.0, 47.0, 46.0, 47.0, 47.95, 48.10, 48.13, 51.36, 51.40, 51.44, 51.47, 52.2, 52.8, 52.9, 58.70, 58.76, 108.2, 117.1, 118.8, 120.6, 122.0, 122.54, 122.56, 123.0, 126.6, 127.2, 127.3, 127.5, 128.55, 128.61, 129.65, 129.70, 130.1, 136.7, 139.7, 146.8, 146.9, 148.1, 148.6, 148.7, 149.0, 156.2, 162.6, 165.1, 165.2; HRMS (ESI<sup>+</sup>)  $m/z$  858.8580 ([M + 2H]<sup>2+</sup> C<sub>83</sub>H<sub>115</sub>N<sub>15</sub>O<sub>13</sub>S<sub>5</sub>Si<sup>2+</sup> requires 858.8580); HPLC analysis:  $R_t$  = 38.1 min [column: Shiseido CAPCELL PAK MG II (4.6 mm i.d. × 250 mm); mobile phase: MeOH:H<sub>2</sub>O = 40:60 (0–5 min), linear gradient from 40:60 to 99:1 (5–30 min), 99:1 (30–50 min); flow rate: 1.00 mL/min; detection: UV at 254 nm].



4-(1-(1-(4-(2-((4-(1-(3-(Dodecylthio)-1-oxo-1-(4-(2-(phenoxy)sulfonyl)ethyl)piperazin-1-yl)propan-2-yl)-1*H*-1,2,3-triazol-4-yl)phenoxy)sulfonyl)ethyl)piperazin-1-yl)-1-oxo-3-(phenethylthio)propan-2-yl)-1*H*-1,2,3-triazol-4-yl)phenyl 2-(4-(3-(butylamino)-2-(4-(4-(*tert*-butyldimethylsilyl)oxy)phenyl)-1*H*-1,2,3-triazol-1-yl)propanoyl)piperazin-1-yl)ethane-1-sulfonate (**16**)

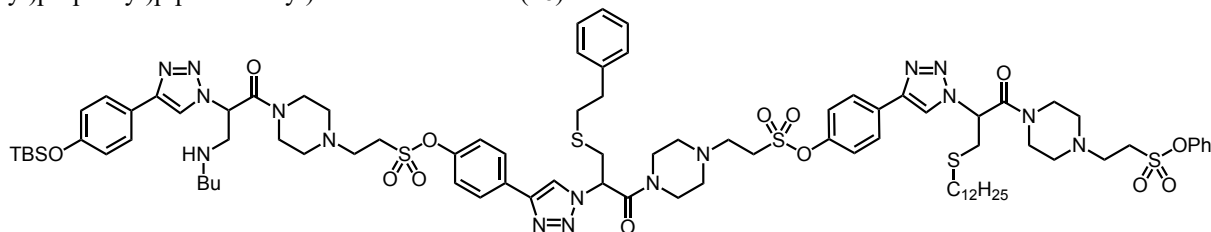

Colorless solid; TLC  $R_f$  0.48 ( $\text{CH}_2\text{Cl}_2/\text{MeOH} = 10/1$ );  $^1\text{H}$  NMR ( $\text{CDCl}_3$ , 400 MHz):  $\delta$  0.23 (s, 6H), 0.86–0.93 (m, 6H), 1.00 (s, 9H), 1.22–1.38 (m, 20H), 1.39–1.46 (m, 2H), 1.52–1.61 (m, 2H), 2.17–2.33 (m, 3H), 2.36–2.46 (m, 3H), 2.50–2.70 (m, 10H), 2.77–2.83 (m, 2H), 2.84–2.91 (m, 2H), 2.93–3.01 (m, 6H), 3.03–3.11 (m, 2H), 3.13–3.21 (m, 1H), 3.34–3.46 (m, 8H), 3.50–3.84 (m, 14H), 5.82–5.93 (m, 3H), 6.89–6.93 (m, 2H), 7.17–7.45 (m, 14H), 7.70–7.74 (m, 2H), 7.87–7.92 (m, 4H), 7.97 (s, 1H), 8.08 (s, 1H), 8.11 (s, 1H);  $^{13}\text{C}$  NMR ( $\text{CDCl}_3$ , 101 MHz):  $\delta$  4.4, 14.0, 14.2, 18.3, 20.3, 22.7, 25.7, 28.8, 29.2, 29.4, 29.53, 29.57, 29.60, 29.65, 31.9, 32.1, 33.0, 34.4, 34.8, 34.9, 36.1, 42.3, 42.5, 45.7, 46.01, 46.04, 47.9, 48.1, 51.31, 51.32, 51.36, 51.39, 51.4, 51.7, 52.2, 52.8, 52.9, 58.69, 58.74, 117.8, 118.7, 120.6, 122.0, 122.6, 123.6, 126.7, 127.0, 127.3, 127.5, 128.55, 128.61, 129.63, 129.69, 130.1, 139.7, 146.85, 146.89, 148.1, 148.7, 148.9, 156.0, 165.1, 165.2, 165.5; IR (NaCl,  $\text{cm}^{-1}$ ) 867, 911, 1148, 1170, 1197, 1254, 1367, 1489, 1651, 1656, 2854, 2927; HRMS (ESI<sup>+</sup>)  $m/z$  895.4026 ( $[\text{M} + 2\text{H}]^{2+}$   $\text{C}_{87}\text{H}_{126}\text{N}_{16}\text{O}_{13}\text{S}_5\text{Si}^{2+}$  requires 895.4029); HPLC analysis:  $R_t = 38.1$  min [column: Shiseido CAPCELL PAK MG II (4.6 mm i.d.  $\times$  250 mm); mobile phase:  $\text{MeOH}:\text{H}_2\text{O} = 40:60$  (0–5 min), linear gradient from 40:60 to 99:1 (5–30 min), 99:1 (30–50 min); flow rate: 1.00 mL/min; detection: UV at 254 nm].

1-(3-Azido-5-iodophenyl)-*N*-methylmethanamine

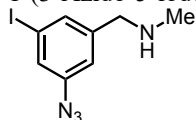

Pale yellow oil; TLC  $R_f$  0.20 (*n*-hexane/EtOAc = 1/1);  $^1\text{H}$  NMR ( $\text{CDCl}_3$ , 400 MHz):  $\delta$  2.45 (s, 3H), 3.69 (s, 2H), 6.96–6.98 (m, 1H), 7.26 (dd, 1H,  $J = 1.8$  Hz), 7.46 (dd, 1H,  $J = 1.8$  Hz);  $^{13}\text{C}$  NMR ( $\text{CDCl}_3$ , 101 MHz):  $\delta$  36.0, 55.0, 94.7, 118.1, 126.5, 133.6, 141.3, 144.1; IR (NaCl,  $\text{cm}^{-1}$ ) 844, 1290, 1435, 1440, 1566, 1591, 2113, 2790, 2843; HRMS (ESI<sup>+</sup>)  $m/z$  288.9951 ( $[\text{M} + \text{H}]^+$   $\text{C}_8\text{H}_{10}\text{IN}_4^+$  requires 288.9950).

*tert*-Butyl (3-azido-5-iodobenzyl)(methyl)carbamate

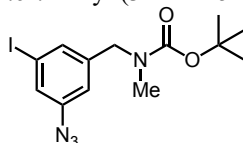

Pale yellow oil; TLC  $R_f$  0.70 (*n*-hexane/EtOAc = 6/1);  $^1\text{H}$  and  $^{13}\text{C}$  NMR analysis show the presence of rotational isomers.  $^1\text{H}$  NMR ( $\text{CDCl}_3$ , 400 MHz):  $\delta$  1.43–1.58 (br, 9H), 2.79–2.92 (br, 3H), 4.30–4.42 (br, 2H), 6.82–6.90 (br, 1H), 7.27–7.31 (br, 1H), 7.35–7.39 (br, 1H);  $^{13}\text{C}$  NMR ( $\text{CDCl}_3$ , 101 MHz):  $\delta$  28.4, 34.3, 51.1 (br), 51.8 (br), 80.3 (br), 94.7, 117.3 (br), 126.7, 132.8 (br), 141.6, 155.4 (br), 156.1 (br); IR (NaCl,  $\text{cm}^{-1}$ ) 878, 1147, 1173, 1290, 1366, 1392, 1445, 1480, 1568, 1595, 1694, 2114, 2930, 2976; HRMS (ESI<sup>+</sup>)  $m/z$  411.0291 ( $[\text{M} + \text{Na}]^+$   $\text{C}_{13}\text{H}_{17}\text{IN}_4\text{NaO}_2^+$  requires 411.0294).

*tert*-Butyl (3-amino-5-iodobenzyl)(methyl)carbamate

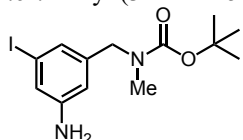

Pale yellow oil; TLC  $R_f$  0.70 (*n*-hexane/EtOAc = 1/1);  $^1\text{H}$  and  $^{13}\text{C}$  NMR analysis show the presence of rotational isomers.  $^1\text{H}$  NMR ( $\text{CDCl}_3$ , 400 MHz):  $\delta$  1.42–1.58 (br, 9H), 2.77–2.89 (br, 3H), 3.65–3.79 (br, 2H), 4.23–4.32 (br, 2H), 6.40–6.55 (br, 1H), 6.90–7.00 (br, 2H);  $^{13}\text{C}$  NMR ( $\text{CDCl}_3$ , 101 MHz):  $\delta$  28.5, 34.1, 51.9 (br), 51.9 (br), 80.0 (br), 95.1, 112.9 (br), 113.6 (br), 122.5 (br), 126.2 (br), 126.6 (br), 141.2 (br), 147.9, 155.7 (br); IR (NaCl,  $\text{cm}^{-1}$ ) 877, 1147, 1246, 1393, 1448, 1462, 1566, 1682, 2976, 3358; HRMS (ESI<sup>+</sup>)  $m/z$  385.03863 ( $[\text{M} + \text{Na}]^+$   $\text{C}_{13}\text{H}_{19}\text{IN}_2\text{NaO}_2^+$  requires 385.03889).

**HPLC Charts of Triazoles. [(A) 14 (B) 15 (C) S1 (D) S4 (E) S5 (F) S2 (G) 16]**

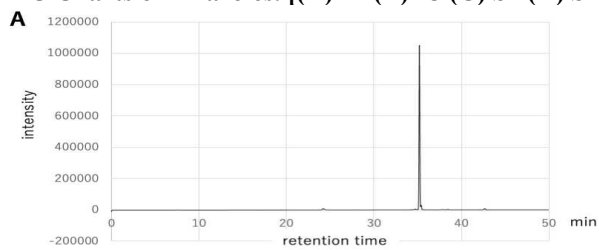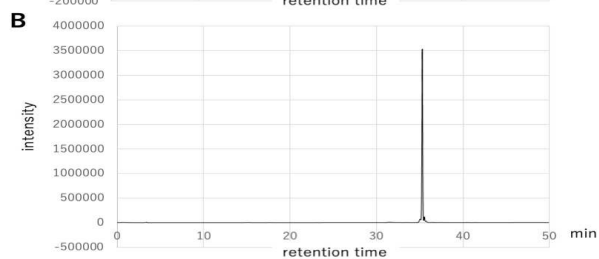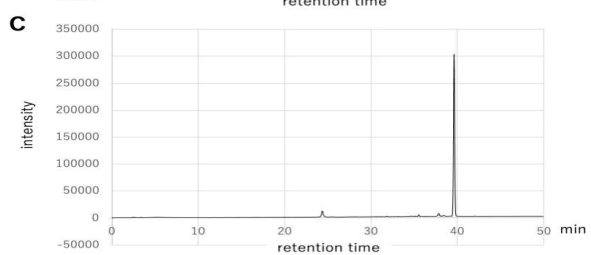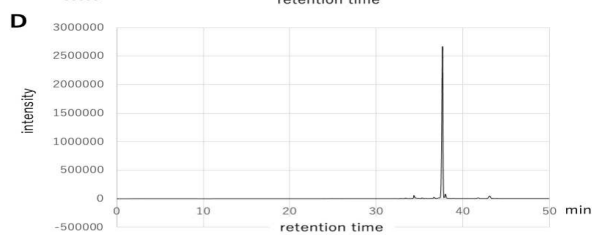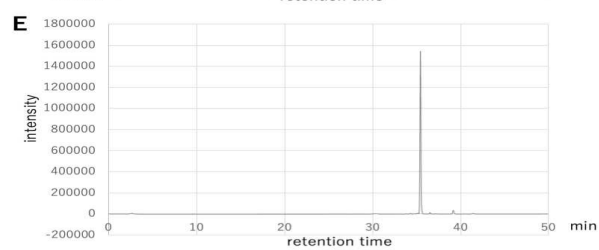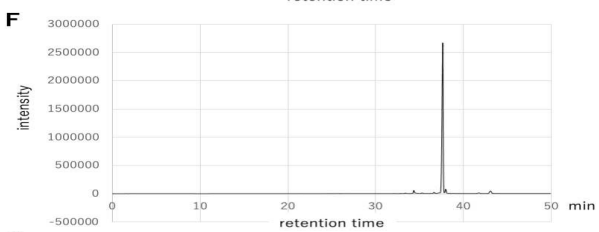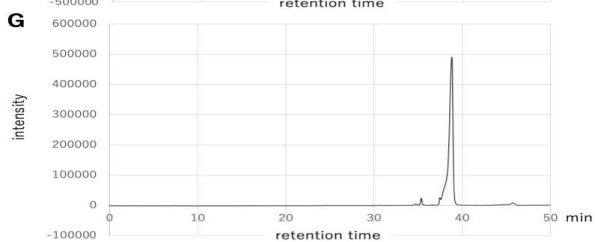

## References for Supporting Information

- S1 S. Yoshida, T. Nonaka, T. Morita, T. Hosoya, *Org. Biomol. Chem.* **2014**, *12*, 7489.
- S2 S. Di Noja, M. Garrido, L. Gualandi, G. Ragazzon, *Chem. Eur. J.* **2023**, *29*, e202300295.
- S3 X. Liu, Q. J. Ling, L. Zhao, G. R. Qiu, Y. H. Wang, L. X. Song, Y. Zhang, J. Ruiz, D. Astruc, H. B. Gu, *Macromol. Rapid Commun.* **2017**, *38*, 1700448.
- S4 L. B. Poole, C. Klomsiri, S. A. Knaggs, C. M. Furdui, K. J. Nelson, M. J. Thomas, J. S. Fetrow, L. W. Daniel, S. B. King, *Bioconjugate Chem.* **2007**, *18*, 2004.
- S5 J. Youziel, A. R. Akhbar, Q. Aziz, M. E. B. Smith, S. Caddick, A. Tinker, J. R. Baker, *Org. Biomol. Chem.* **2014**, *12*, 557.
- S6 J. Dommerholt, S. Schmidt, R. Temming, L. J. A. Hendriks, F. P. J. T. Rutjes, J. C. M. van Hest, D. J. Lefeber, P. Friedl, F. L. van Delft, *Angew. Chem., Int. Ed.* **2010**, *49*, 9422.
- S7 Y. Zhang, H. Li, X. Jiang, C. V. S. Reddy, H. Liang, Y. Zhang, R. Cao, R. W. Y. Sun, M. Tse, L. Qiu, *Adv. Synth. Catal.* **2022**, *364*, 525.
- S8 S. R. Banks, K. M. Yoo, M. E. Welker, *Molbank* **2021**, M1206.
- S9 T. R. Chan, R. Hilgraf, K. B. Sharpless, V. V. Fokin, *Org. Lett.* **2004**, *6*, 2853.
- S10 H. Takemura, G. Orimoto, A. Kobayashi, T. Hosoya, S. Yoshida, *Org. Biomol. Chem.* **2022**, *20*, 6007.

# <sup>1</sup>H and <sup>13</sup>C NMR Spectra of Compounds

<sup>1</sup>H NMR (400 MHz) and <sup>13</sup>C NMR (101 MHz) spectra of *tert*-butyl (*S*)-3-(2-azidoacrylamido)pyrrolidine-1-carboxylate (CDCl<sub>3</sub>)

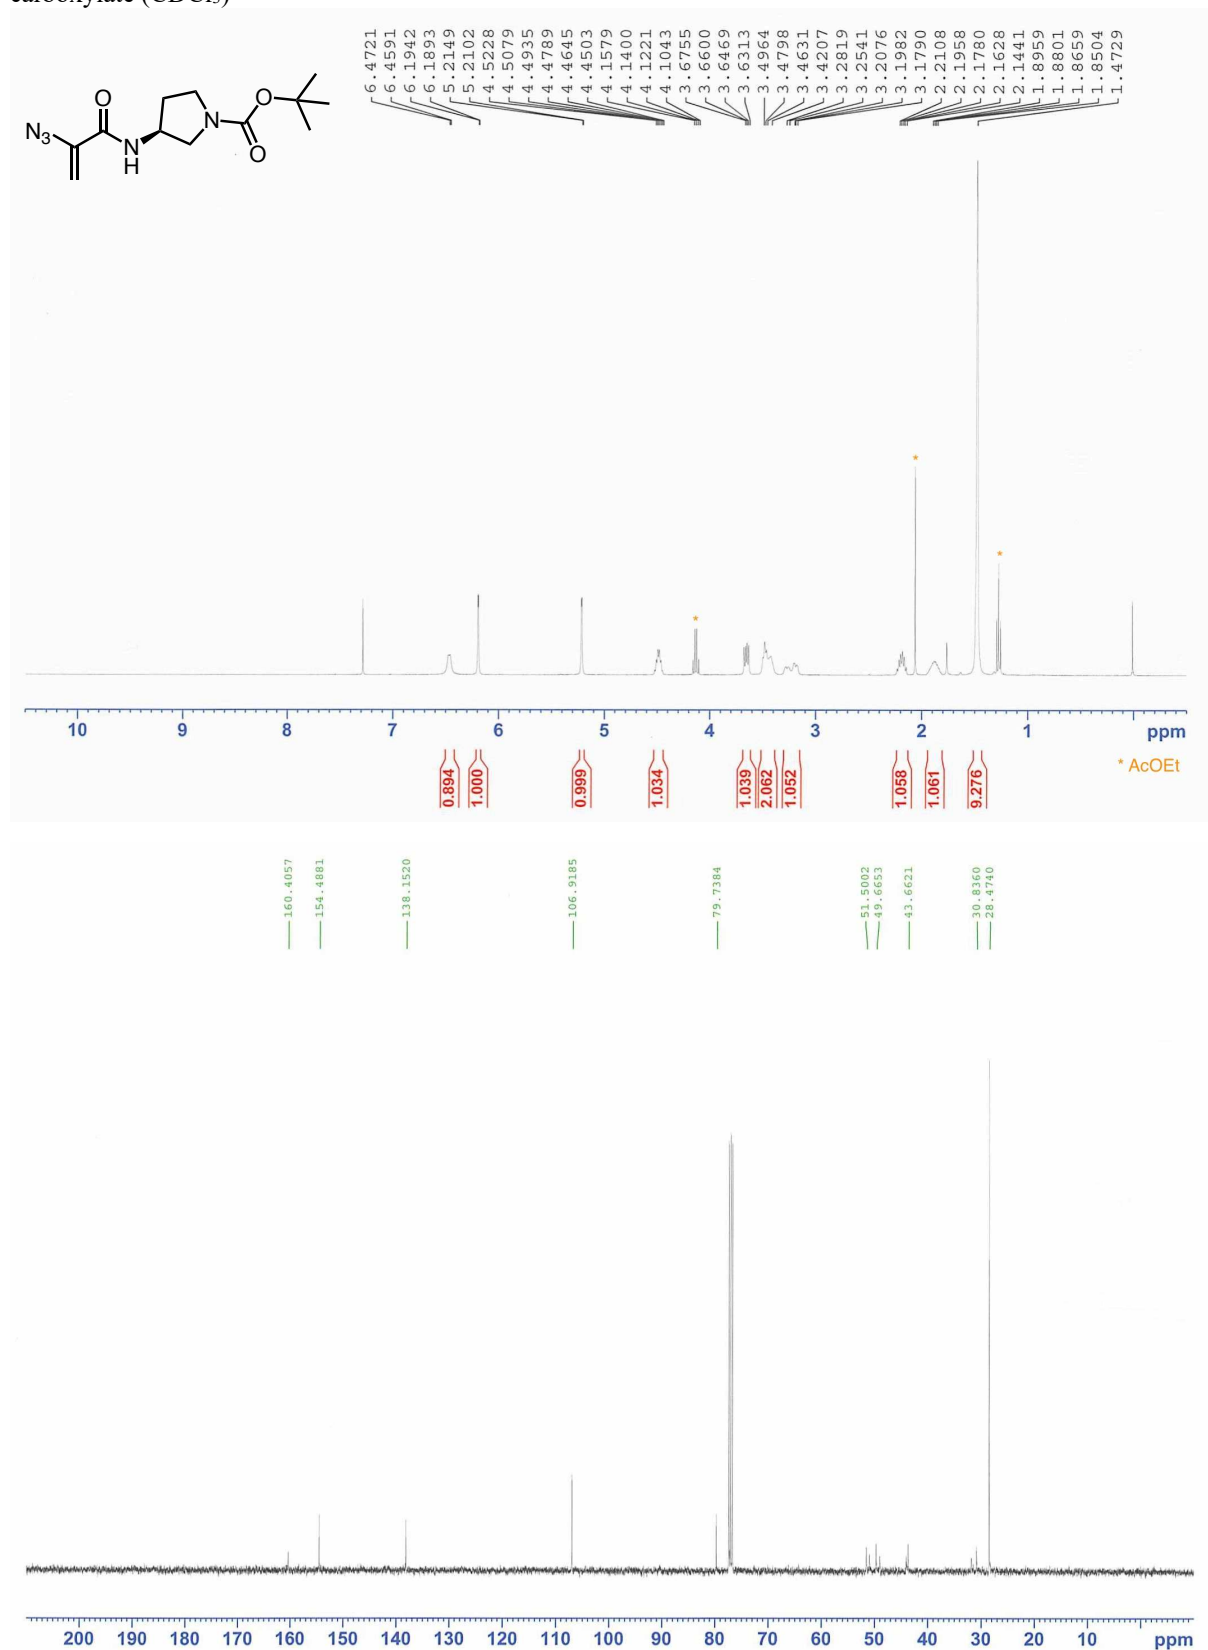

$^1\text{H}$  NMR (400 MHz) and  $^{13}\text{C}$  NMR (101 MHz) spectra of (*S*)-2-azido-*N*-(pyrrolidin-3-yl)acrylamide ( $\text{CDCl}_3$ )

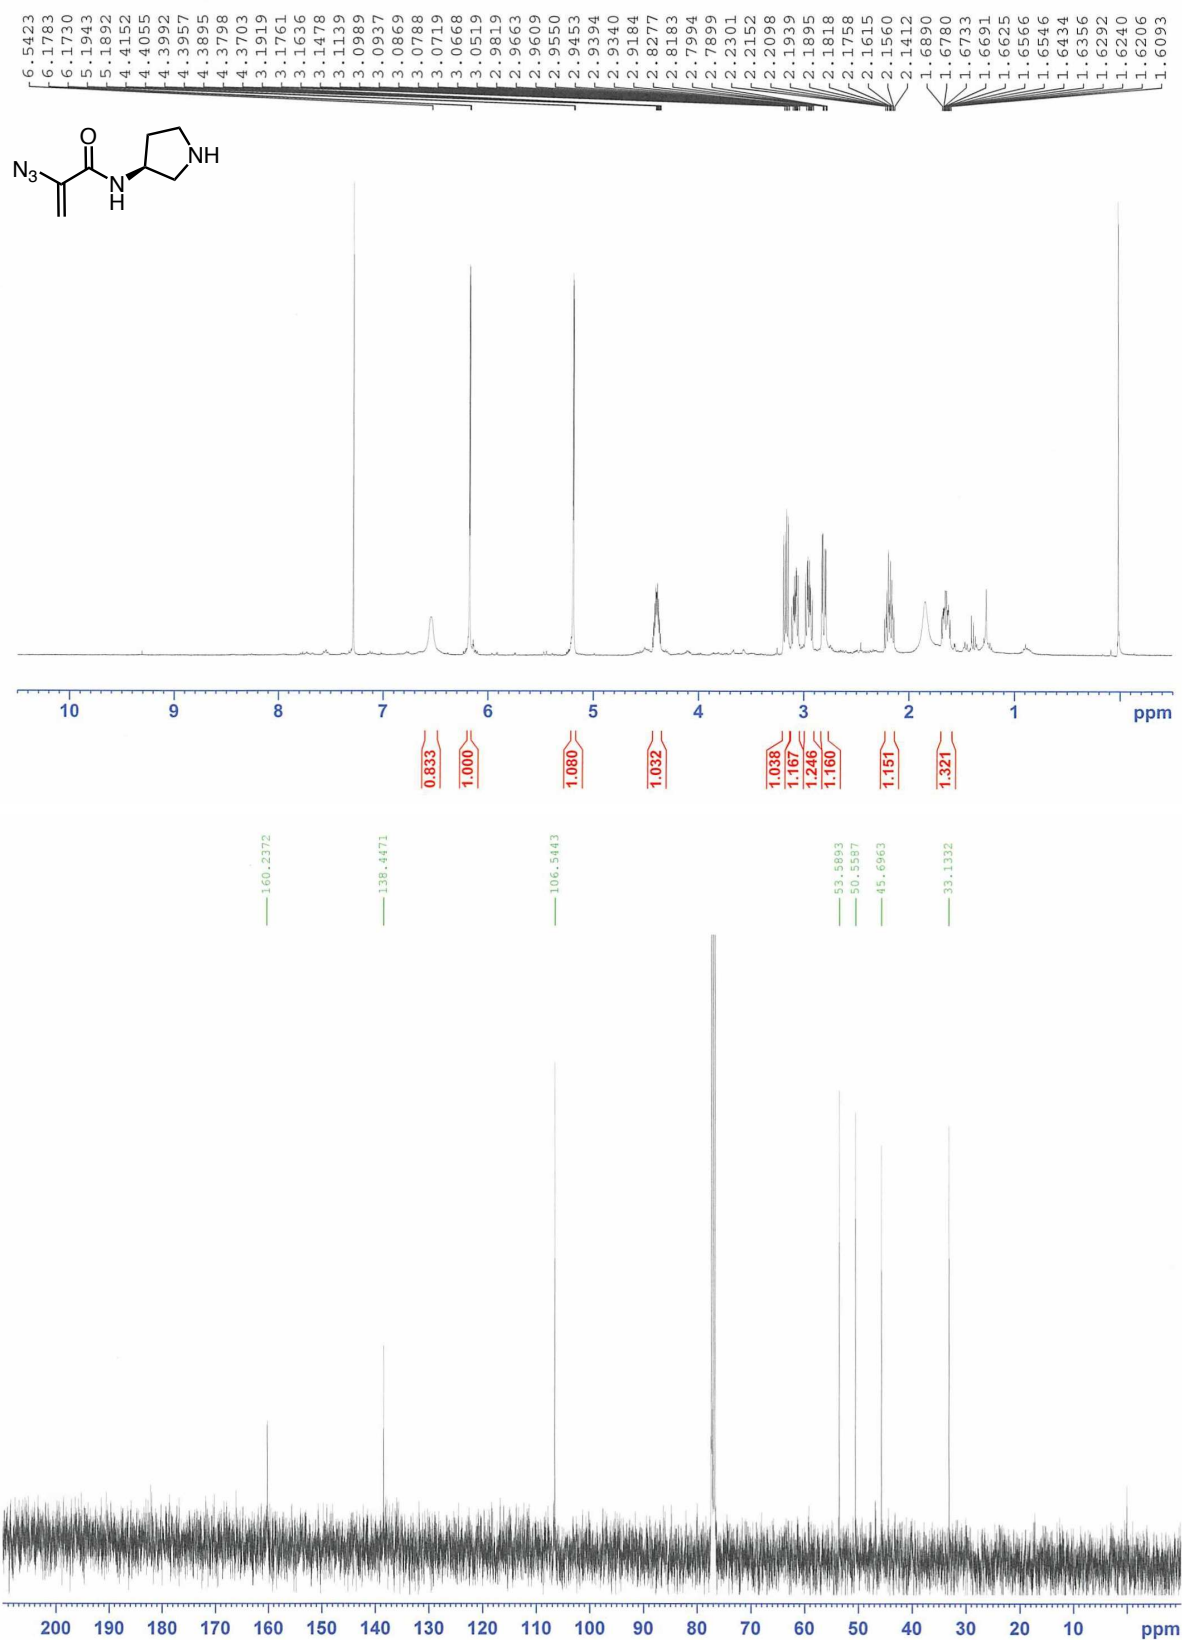

$^1\text{H}$  NMR (400 MHz) and  $^{13}\text{C}$  NMR (101 MHz) spectra of (*S*)-2-(3-(2-azidoacrylamido)pyrrolidin-1-yl)ethane-1-sulfonyl fluoride (**1b**) ( $\text{CDCl}_3$ )

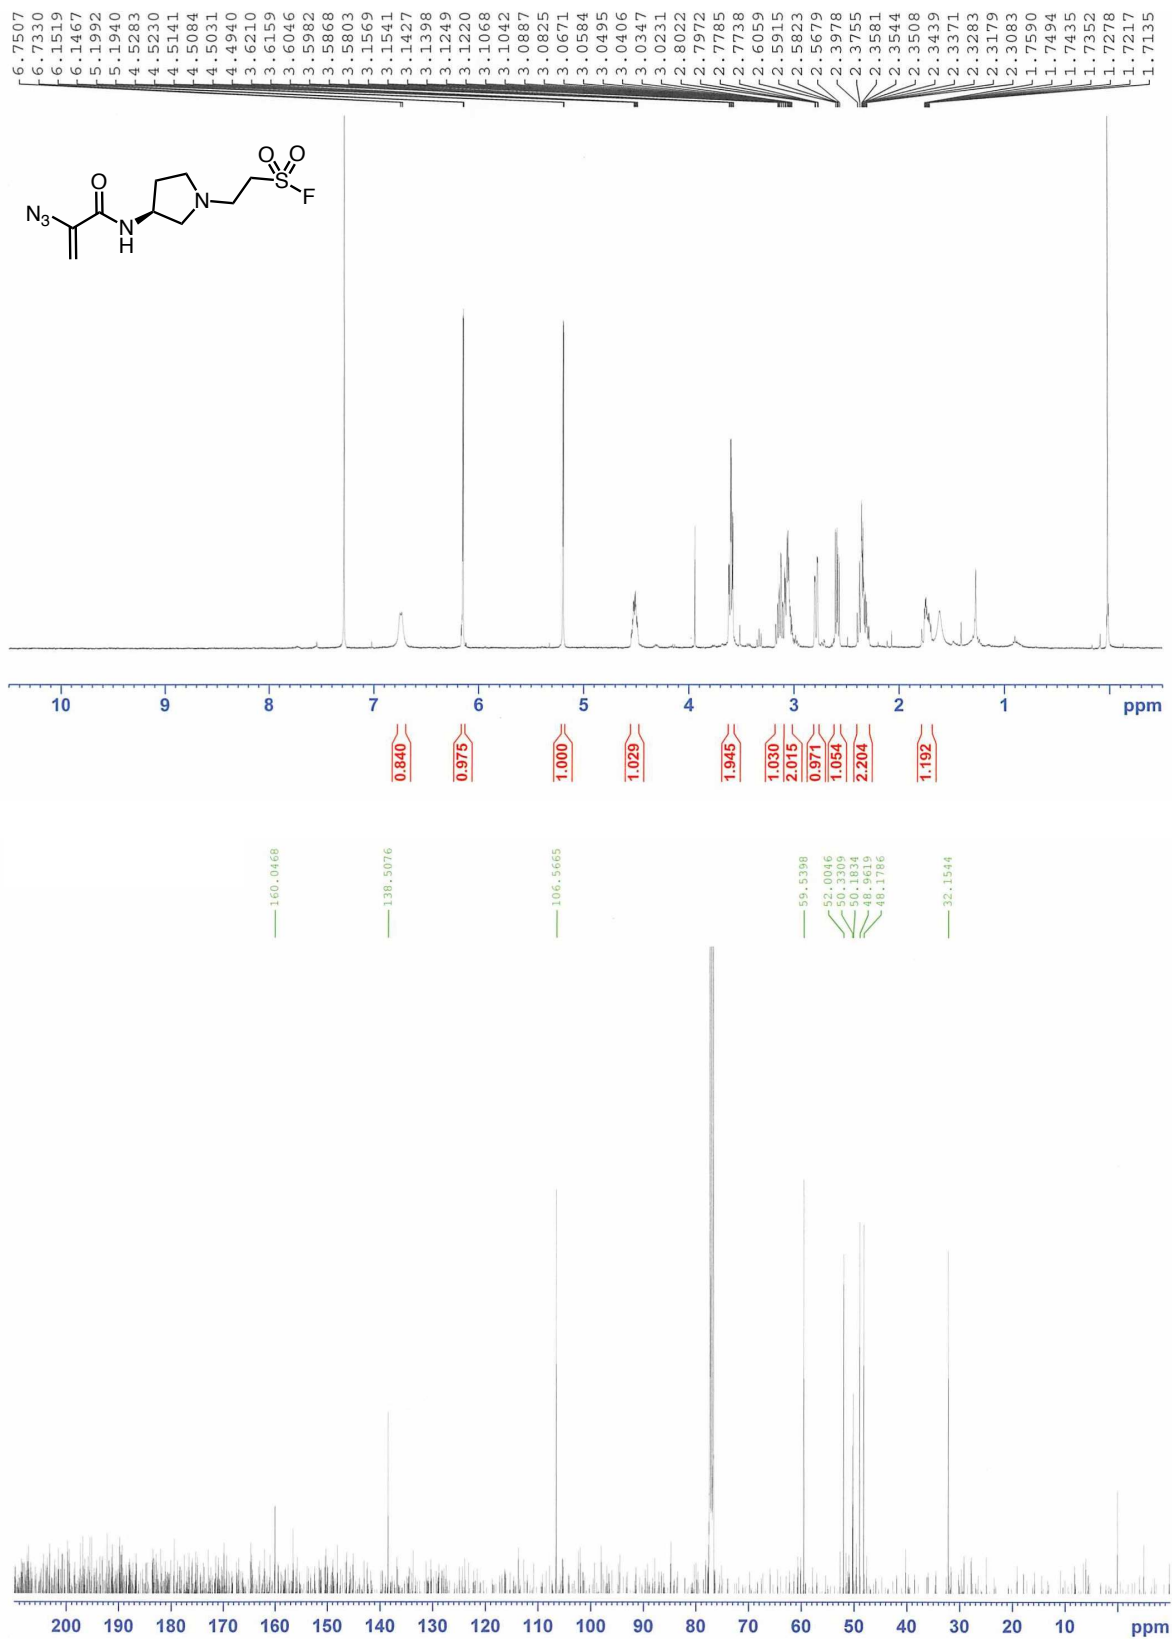

$^1\text{H}$  NMR (400 MHz) and  $^{13}\text{C}$  NMR (101 MHz) spectra of *tert*-butyl 4-(2-azidoacrylamido)piperidine-1-carboxylate ( $\text{CDCl}_3$ )

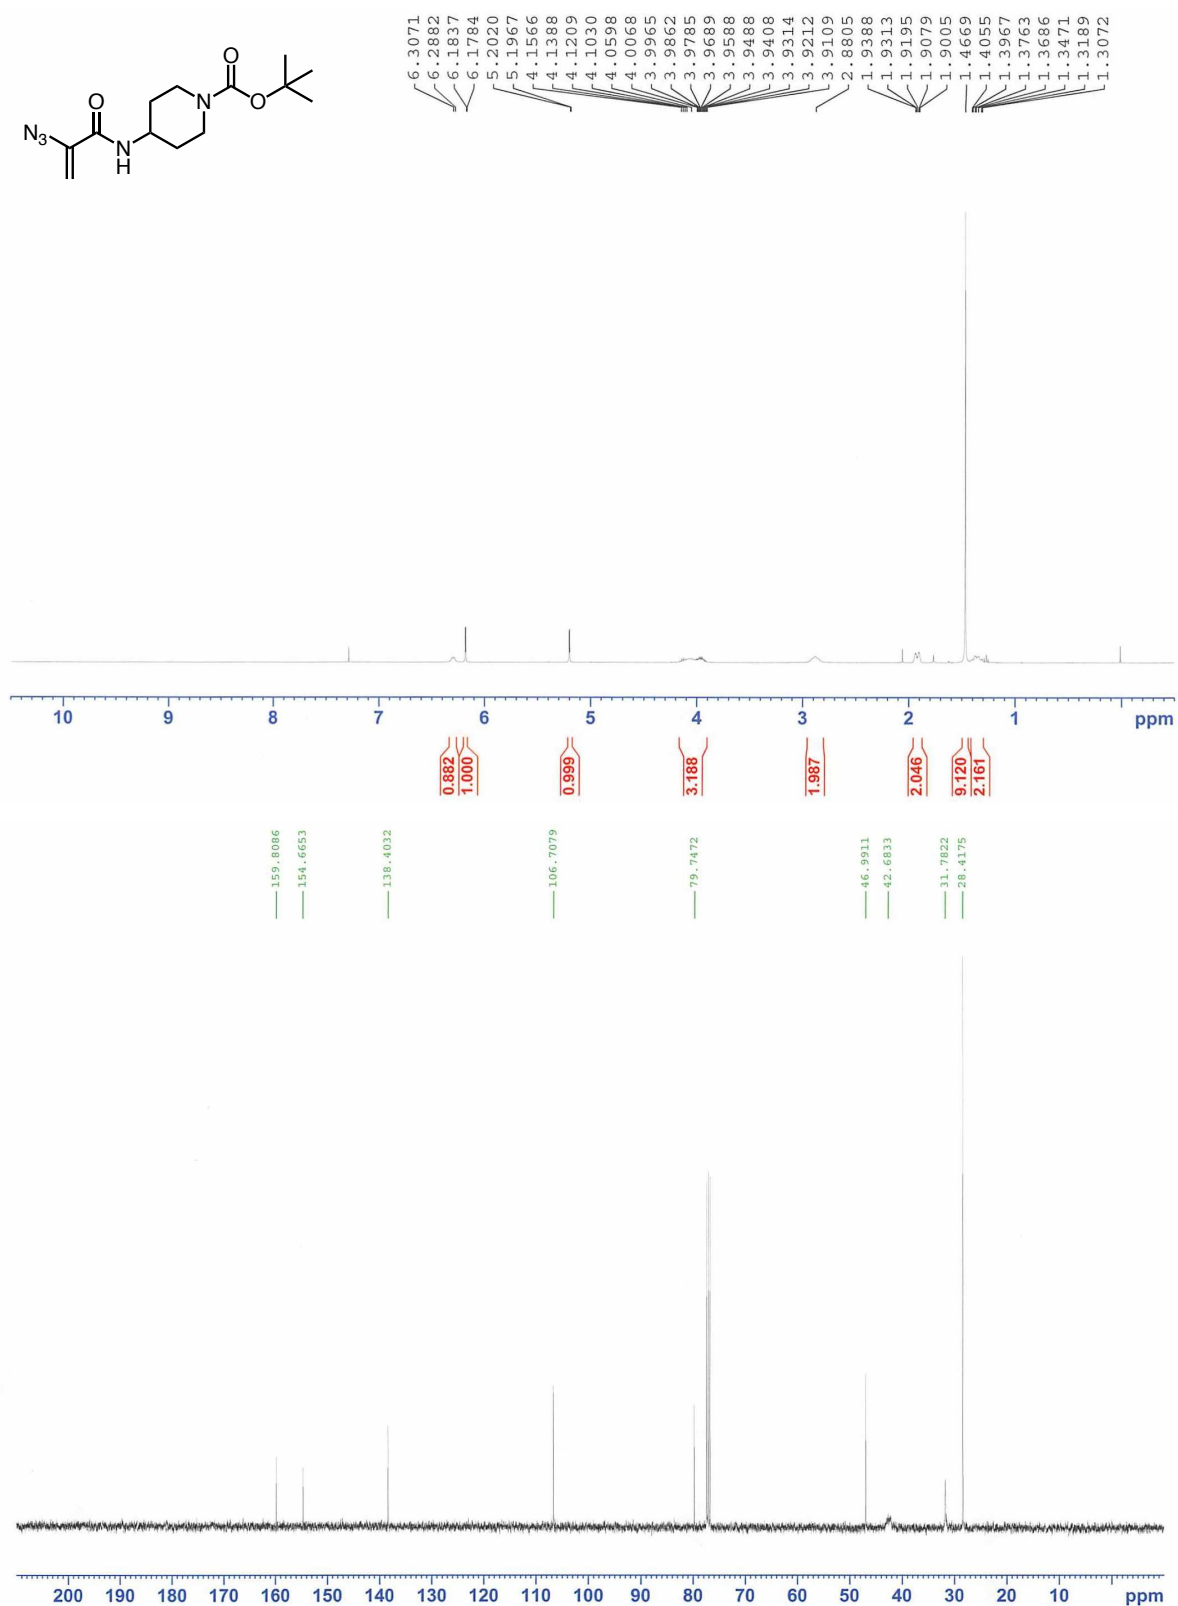

$^1\text{H}$  NMR (400 MHz) and  $^{13}\text{C}$  NMR (101 MHz) spectra of 2-azido-*N*-(piperidin-4-yl)acrylamide ( $\text{CDCl}_3$ )

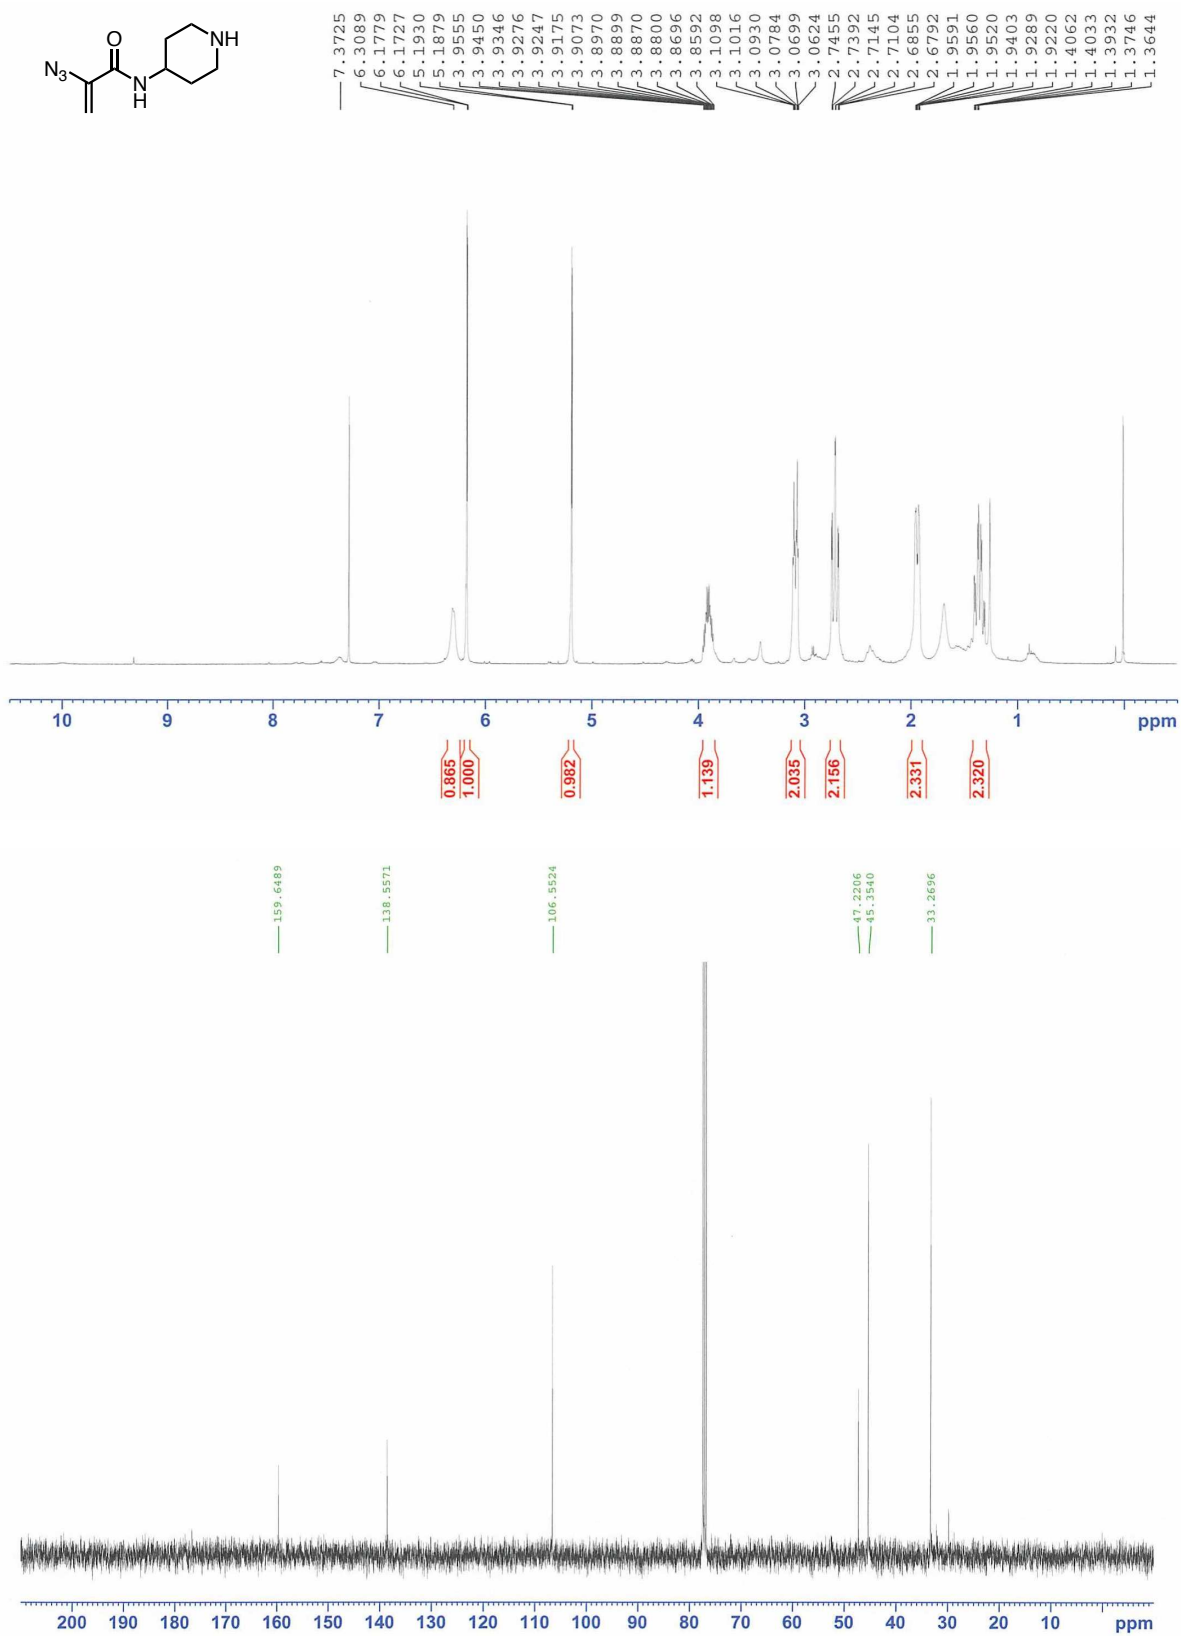



$^1\text{H}$  NMR (400 MHz) and  $^{13}\text{C}$  NMR (101 MHz) spectra of 2-(4-(2-azidoacrylamido)piperidin-1-yl)ethane-1-sulfonyl fluoride (**1c**) ( $\text{CDCl}_3$ )

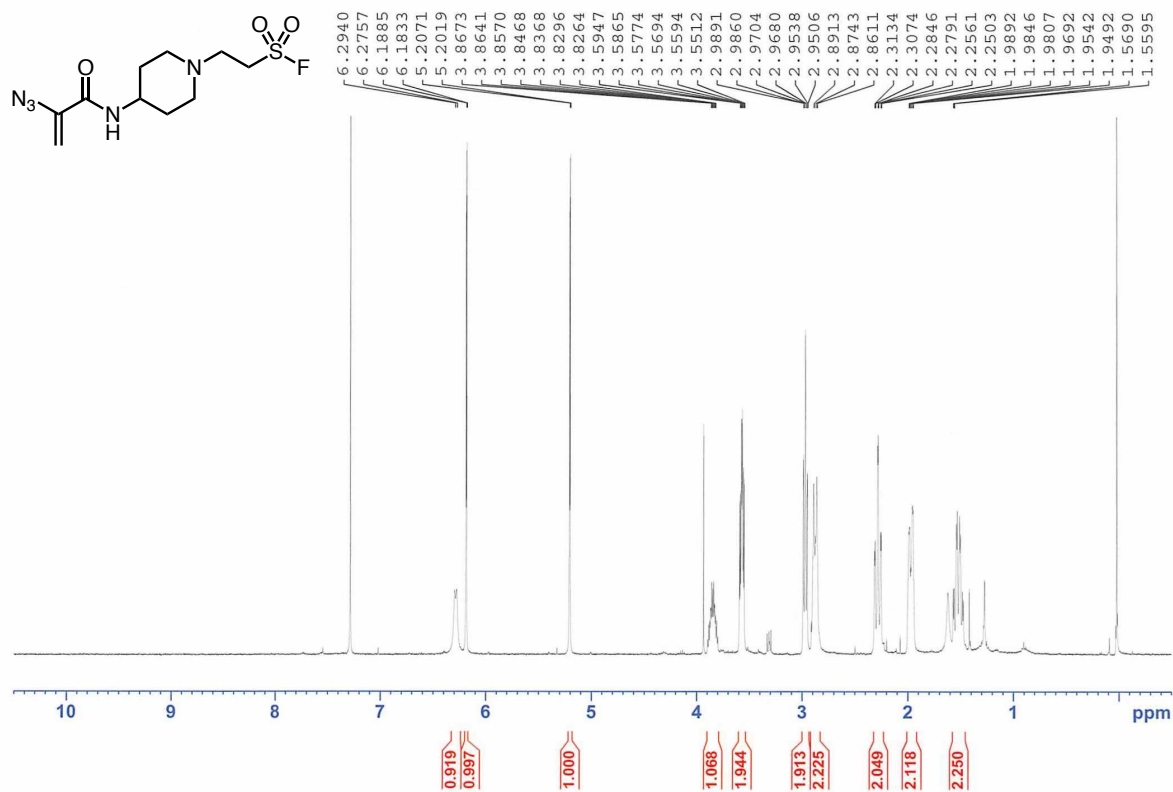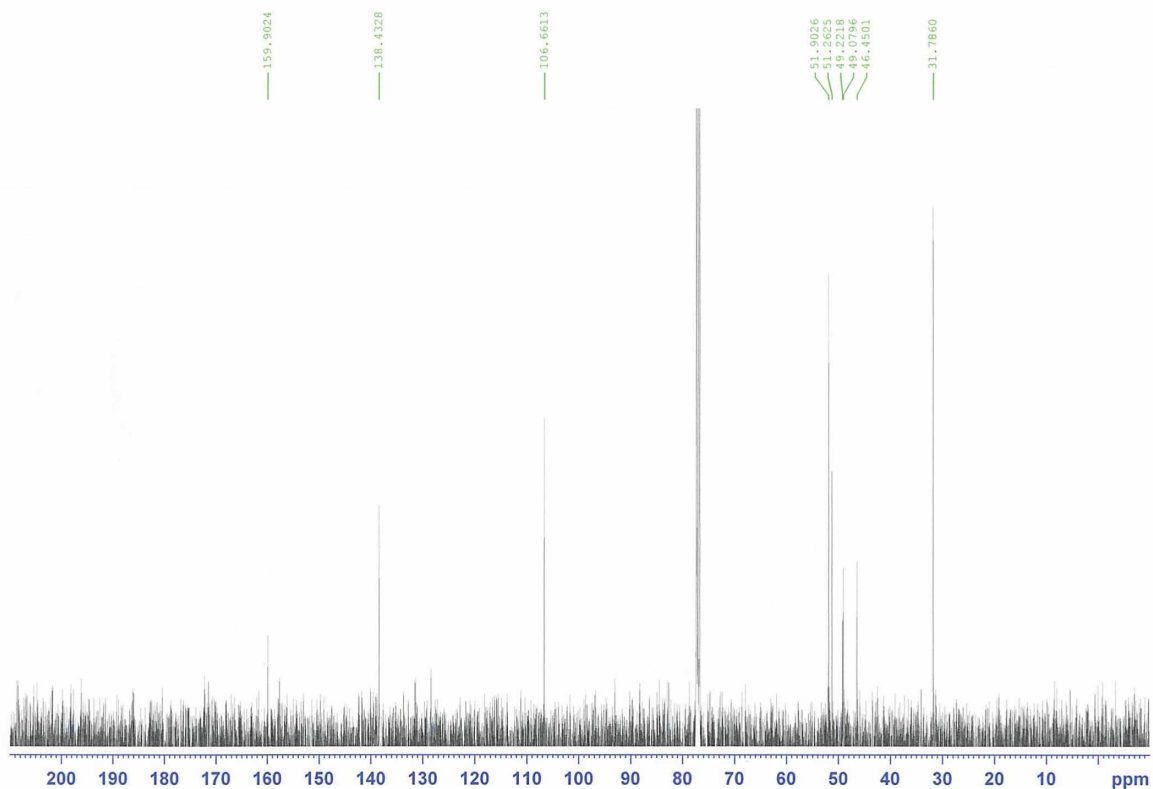

$^1\text{H}$  NMR (400 MHz) and  $^{13}\text{C}$  NMR (101 MHz) spectra of *tert*-butyl (2-(2-azidoacrylamido)ethyl)(methyl)carbamate ( $\text{CDCl}_3$ )

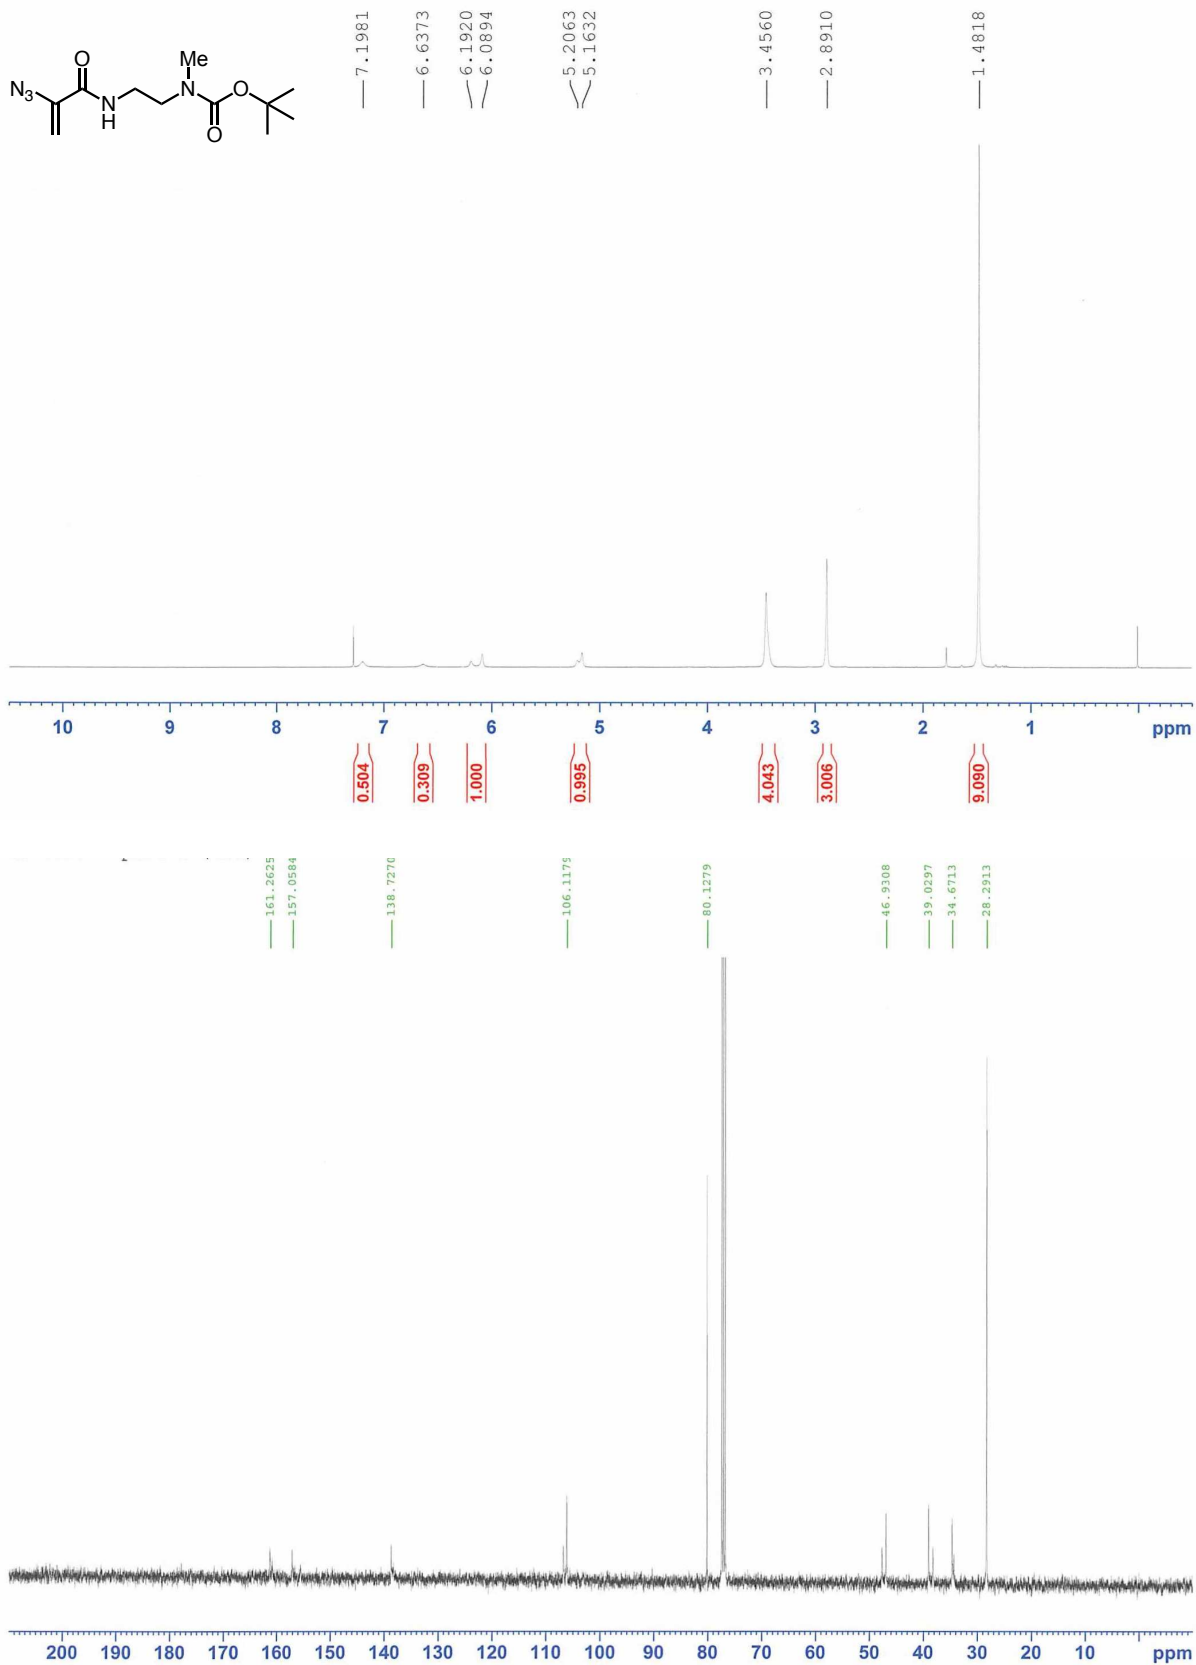

$^1\text{H}$  NMR (400 MHz) and  $^{13}\text{C}$  NMR (101 MHz) spectra of 2-azido-*N*-(2-(methylamino)ethyl)acrylamide ( $\text{CDCl}_3$ )

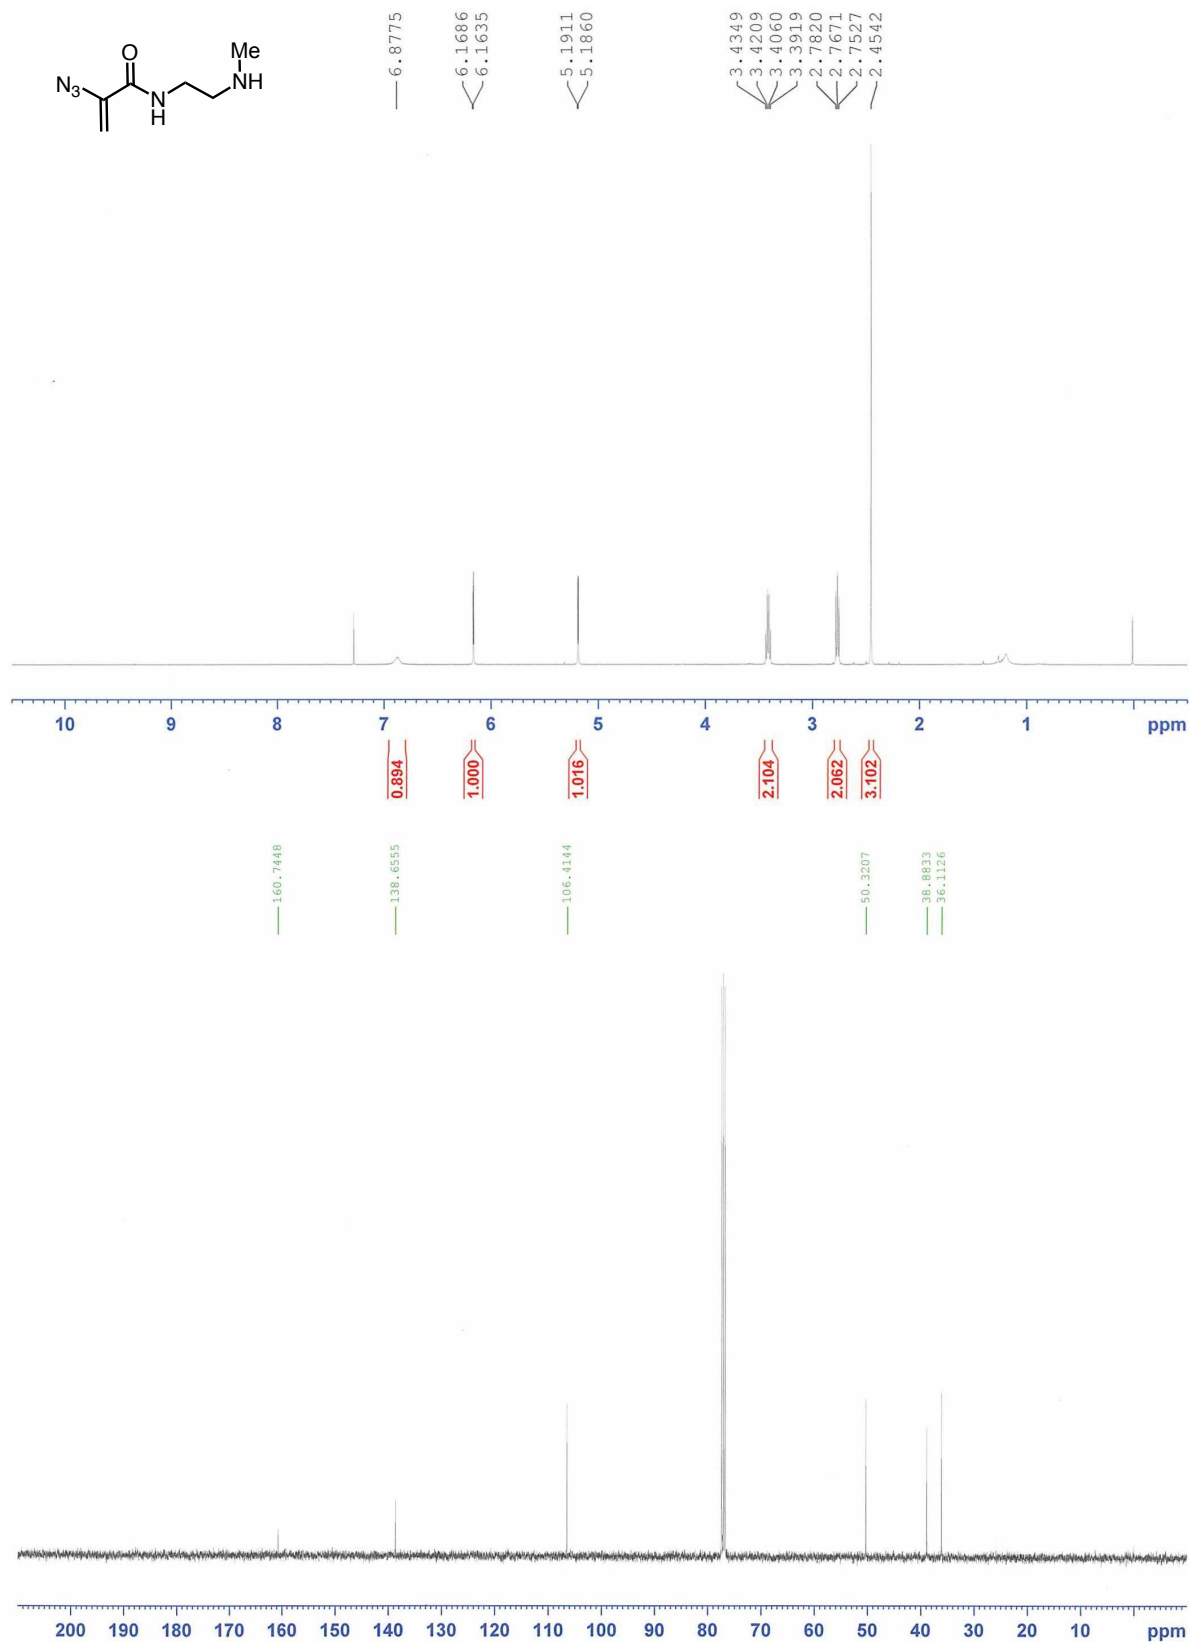

$^1\text{H}$  NMR (400 MHz) and  $^{13}\text{C}$  NMR (101 MHz) spectra of 2-((2-(2-azidoacrylamido)ethyl)(methyl)amino)ethane-1-sulfonyl fluoride (**1d**) ( $\text{CDCl}_3$ )

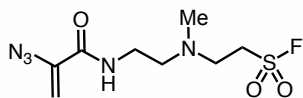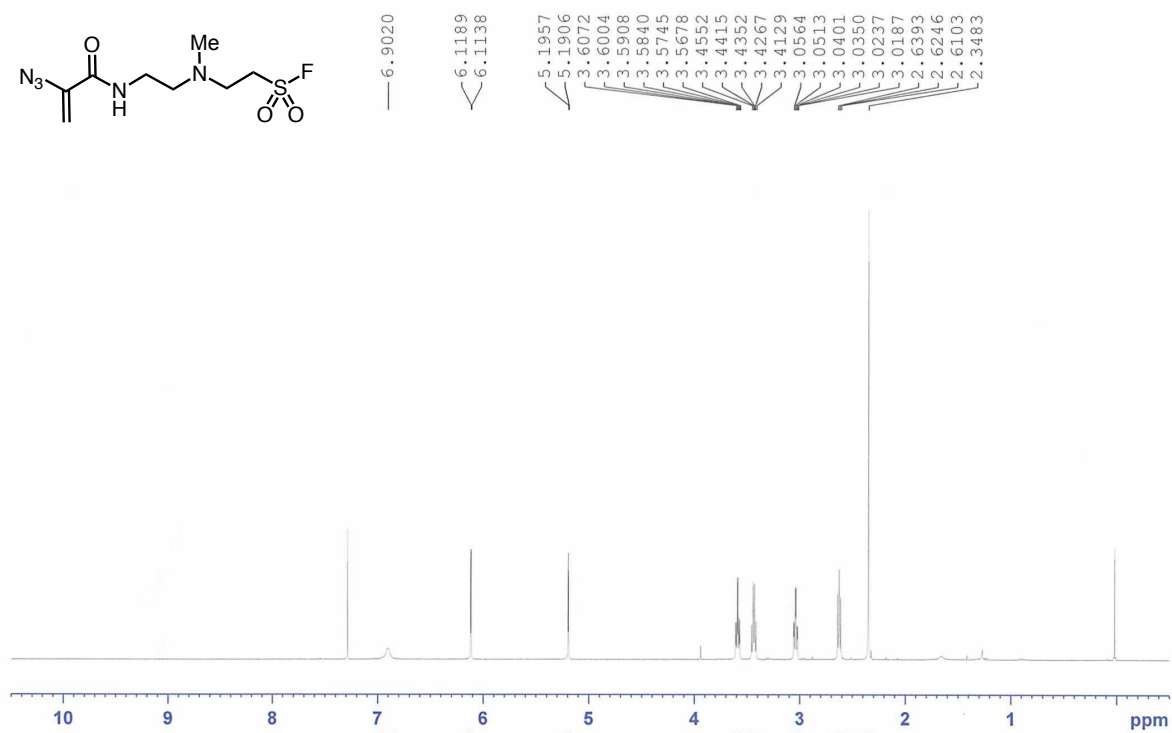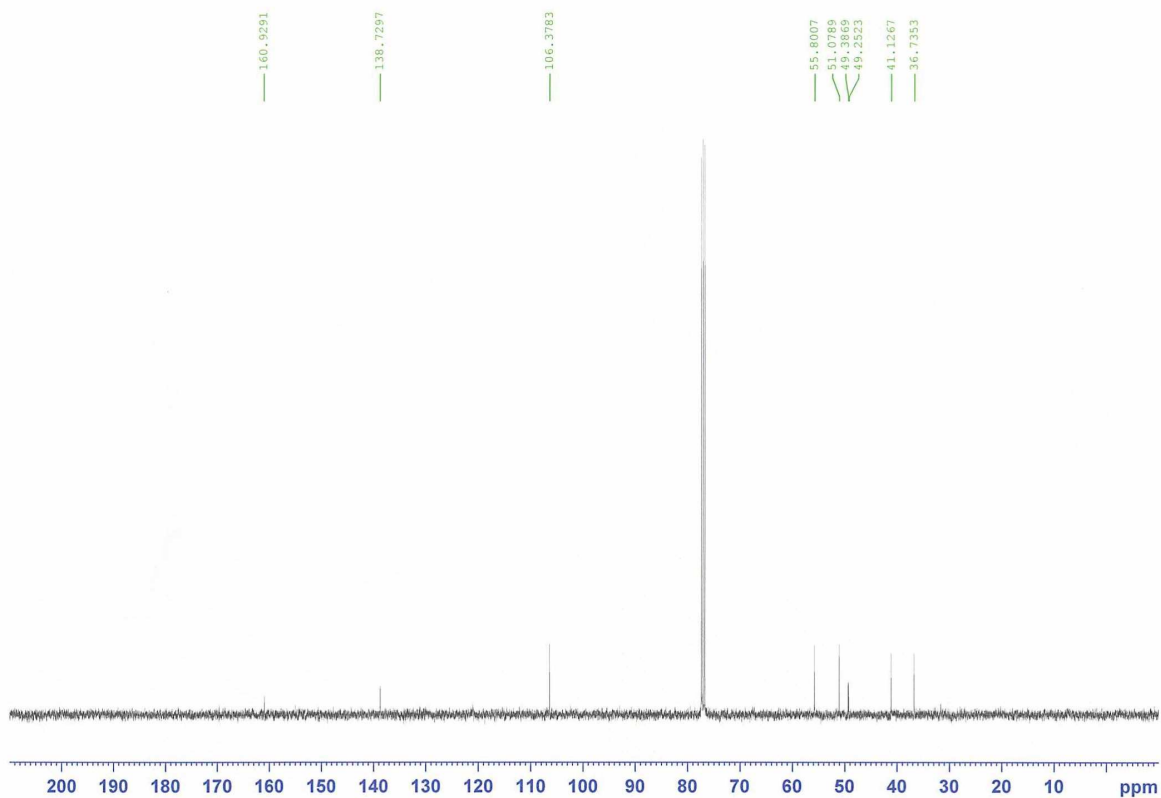

$^1\text{H}$  NMR (400 MHz) and  $^{13}\text{C}$  NMR (101 MHz) spectra of *tert*-butyl (3-(2-azidoacrylamido)-5-iodobenzyl)(methyl)carbamate ( $\text{CDCl}_3$ )

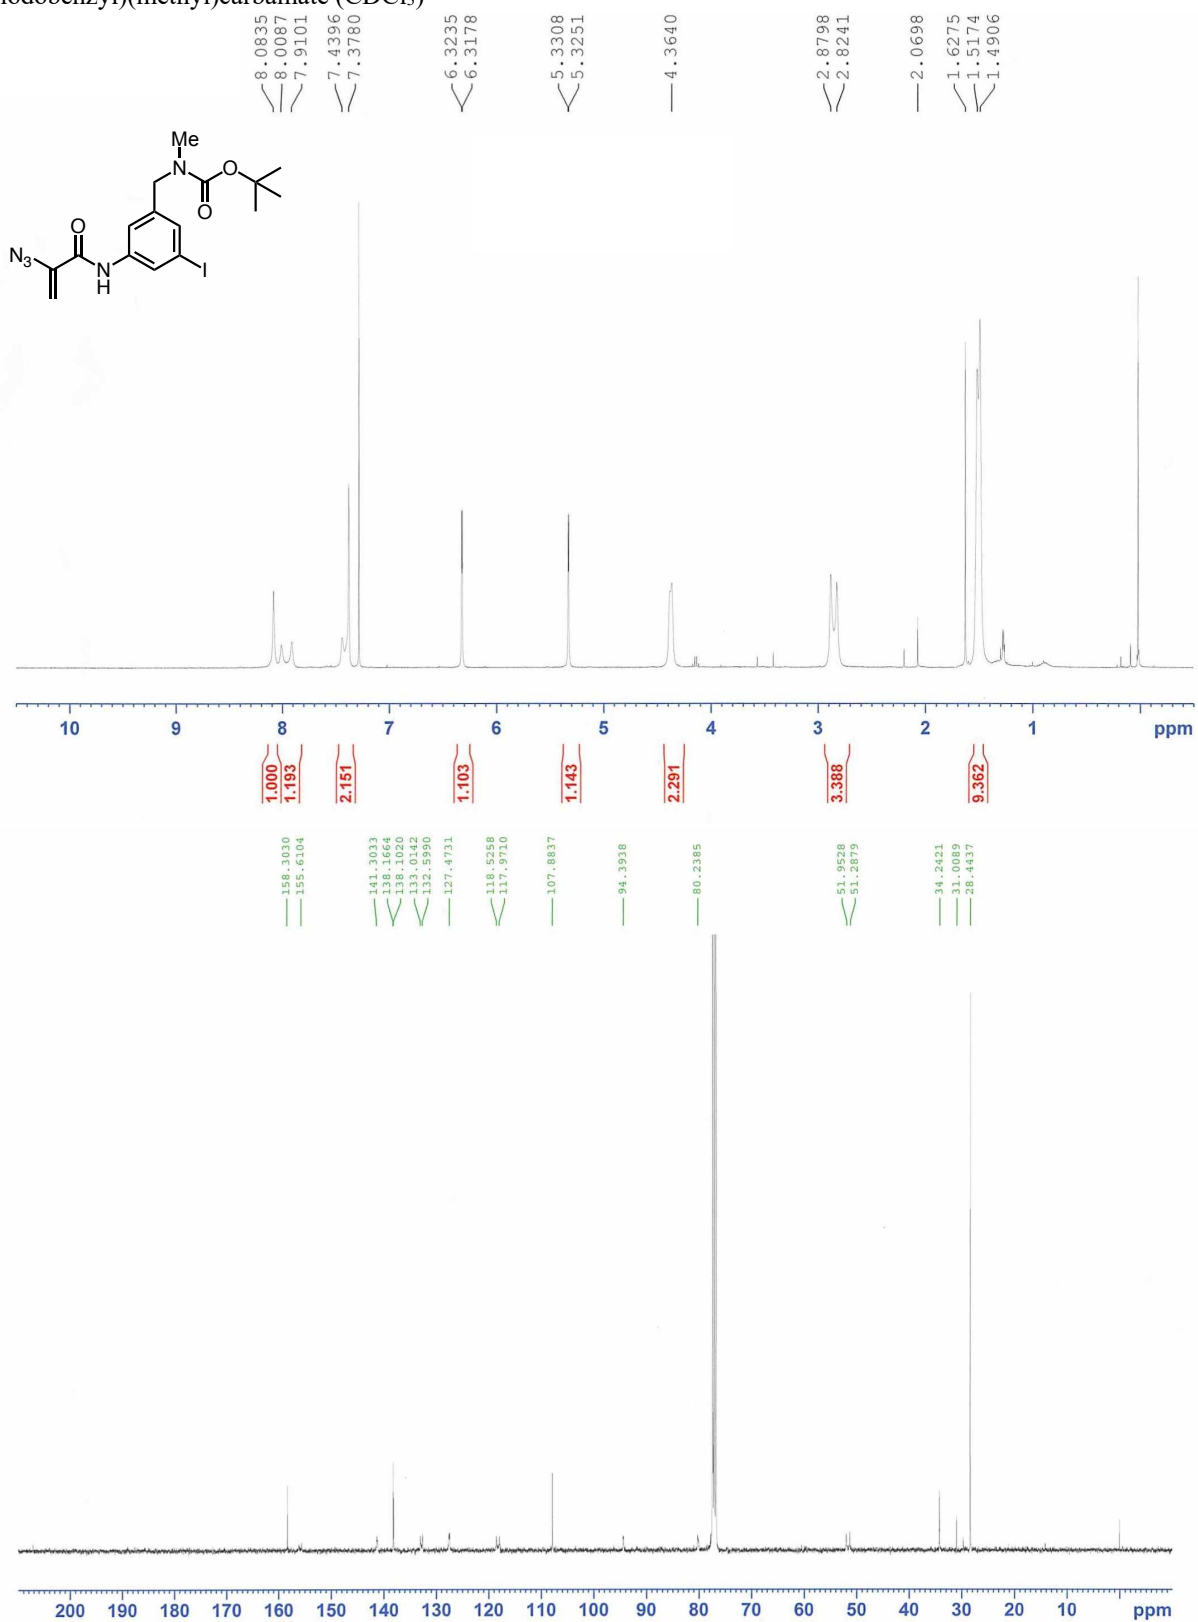

$^1\text{H}$  NMR (400 MHz) and  $^{13}\text{C}$  NMR (101 MHz) spectra of 2-azido-*N*-(3-iodo-5-((methylamino)methyl)phenyl)acrylamide ( $\text{CDCl}_3$ )

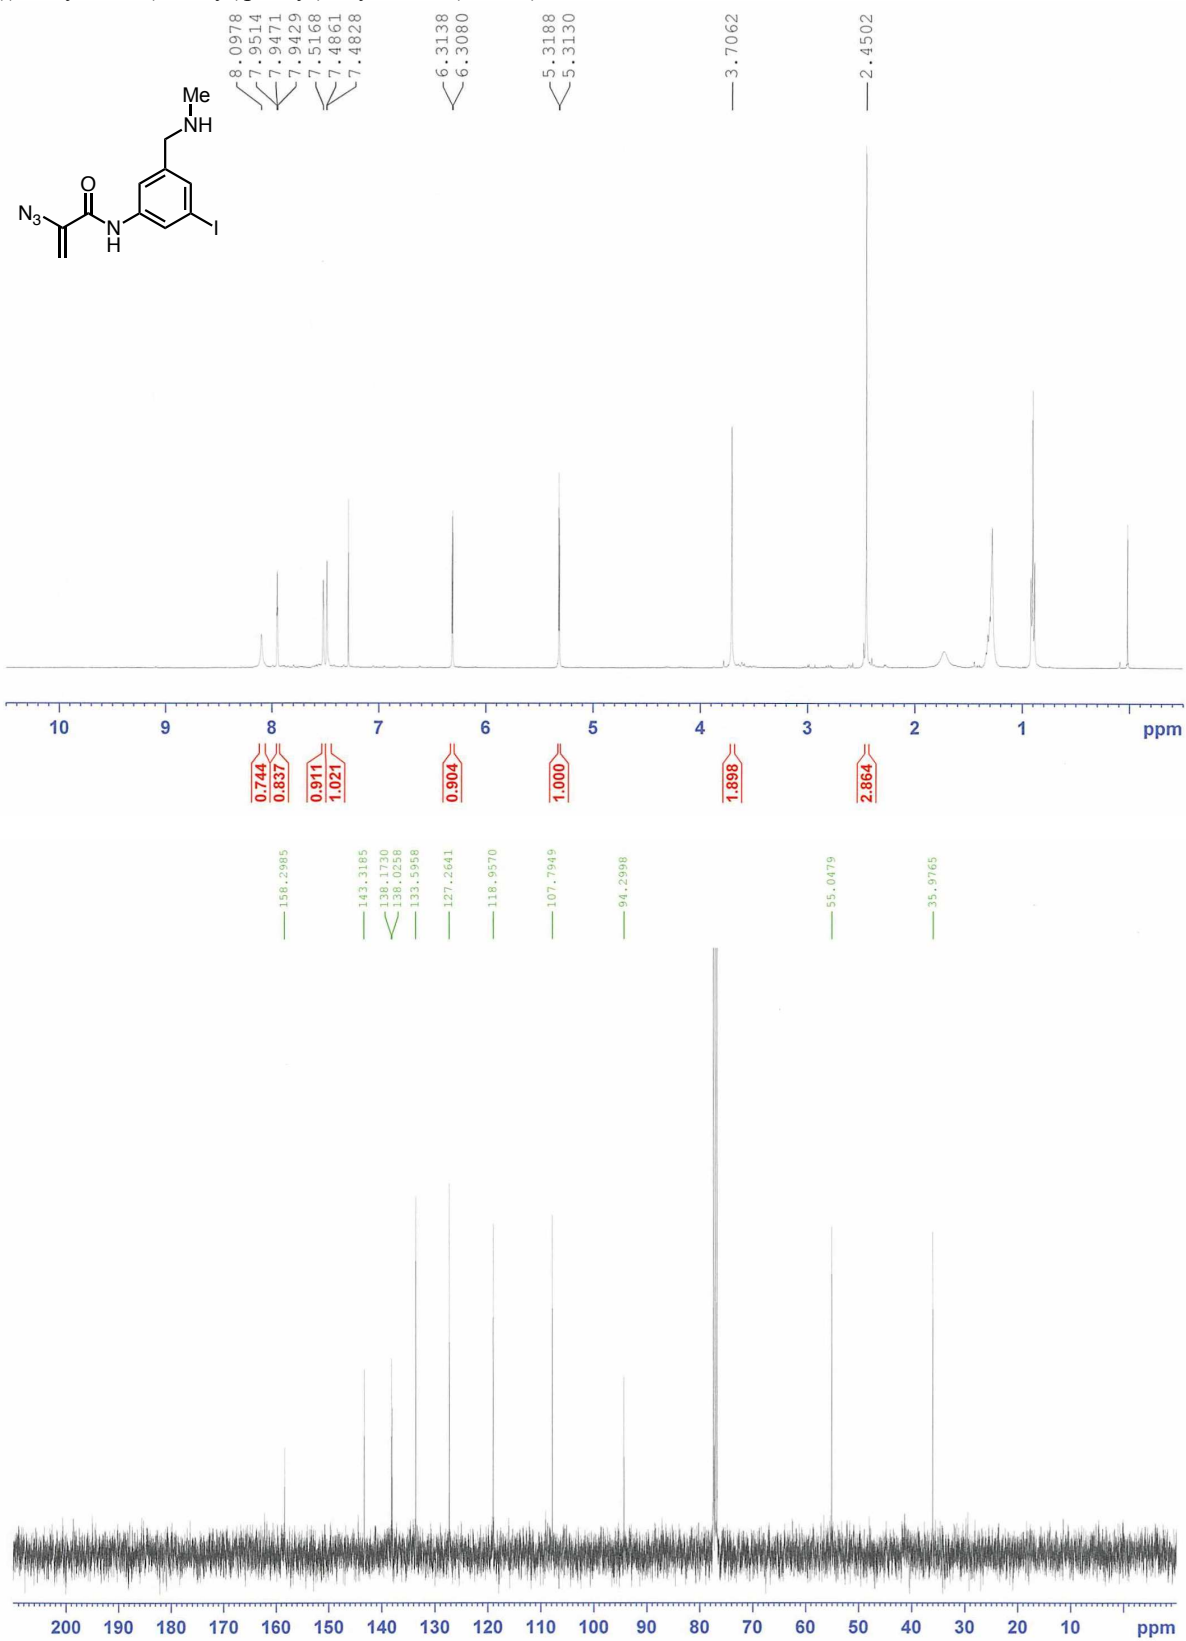

$^1\text{H}$  NMR (400 MHz) and  $^{13}\text{C}$  NMR (101 MHz) spectra of 2-((3-(2-azidoacrylamido)-5-iodobenzyl)(methyl)amino)ethane-1-sulfonyl fluoride (**1e**) ( $\text{CDCl}_3$ )

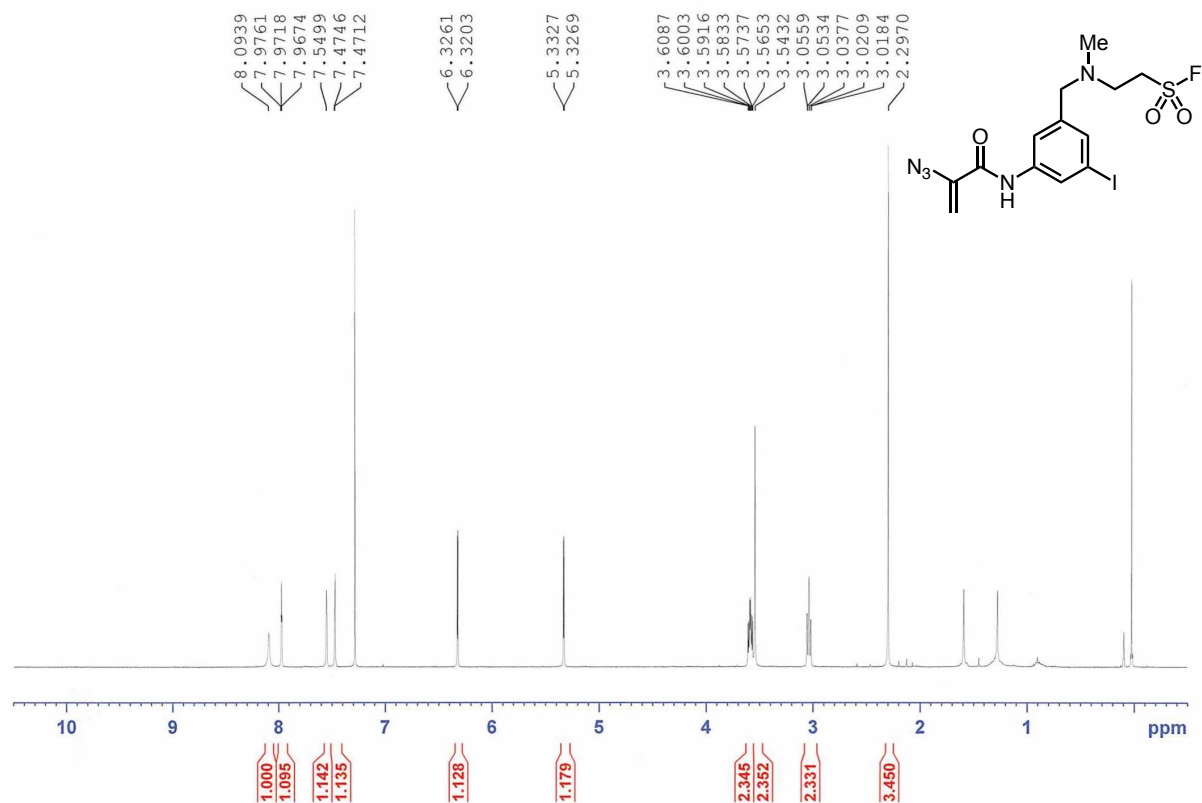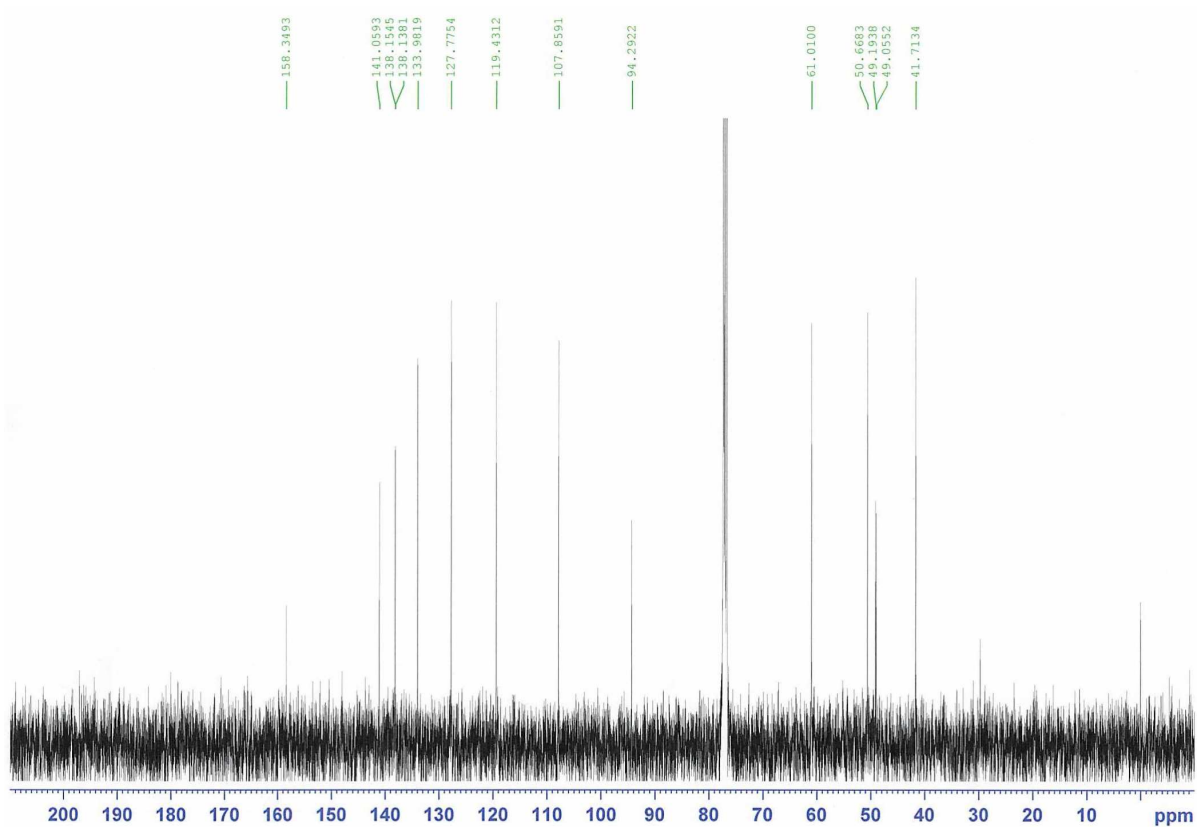

$^1\text{H}$  NMR (400 MHz) and  $^{13}\text{C}$  NMR (101 MHz) spectra of benzo[*d*][1,3]dioxol-5-yl 2-(4-(2-azidoacryloyl)piperazin-1-yl)ethane-1-sulfonate (**9b**) ( $\text{CDCl}_3$ )

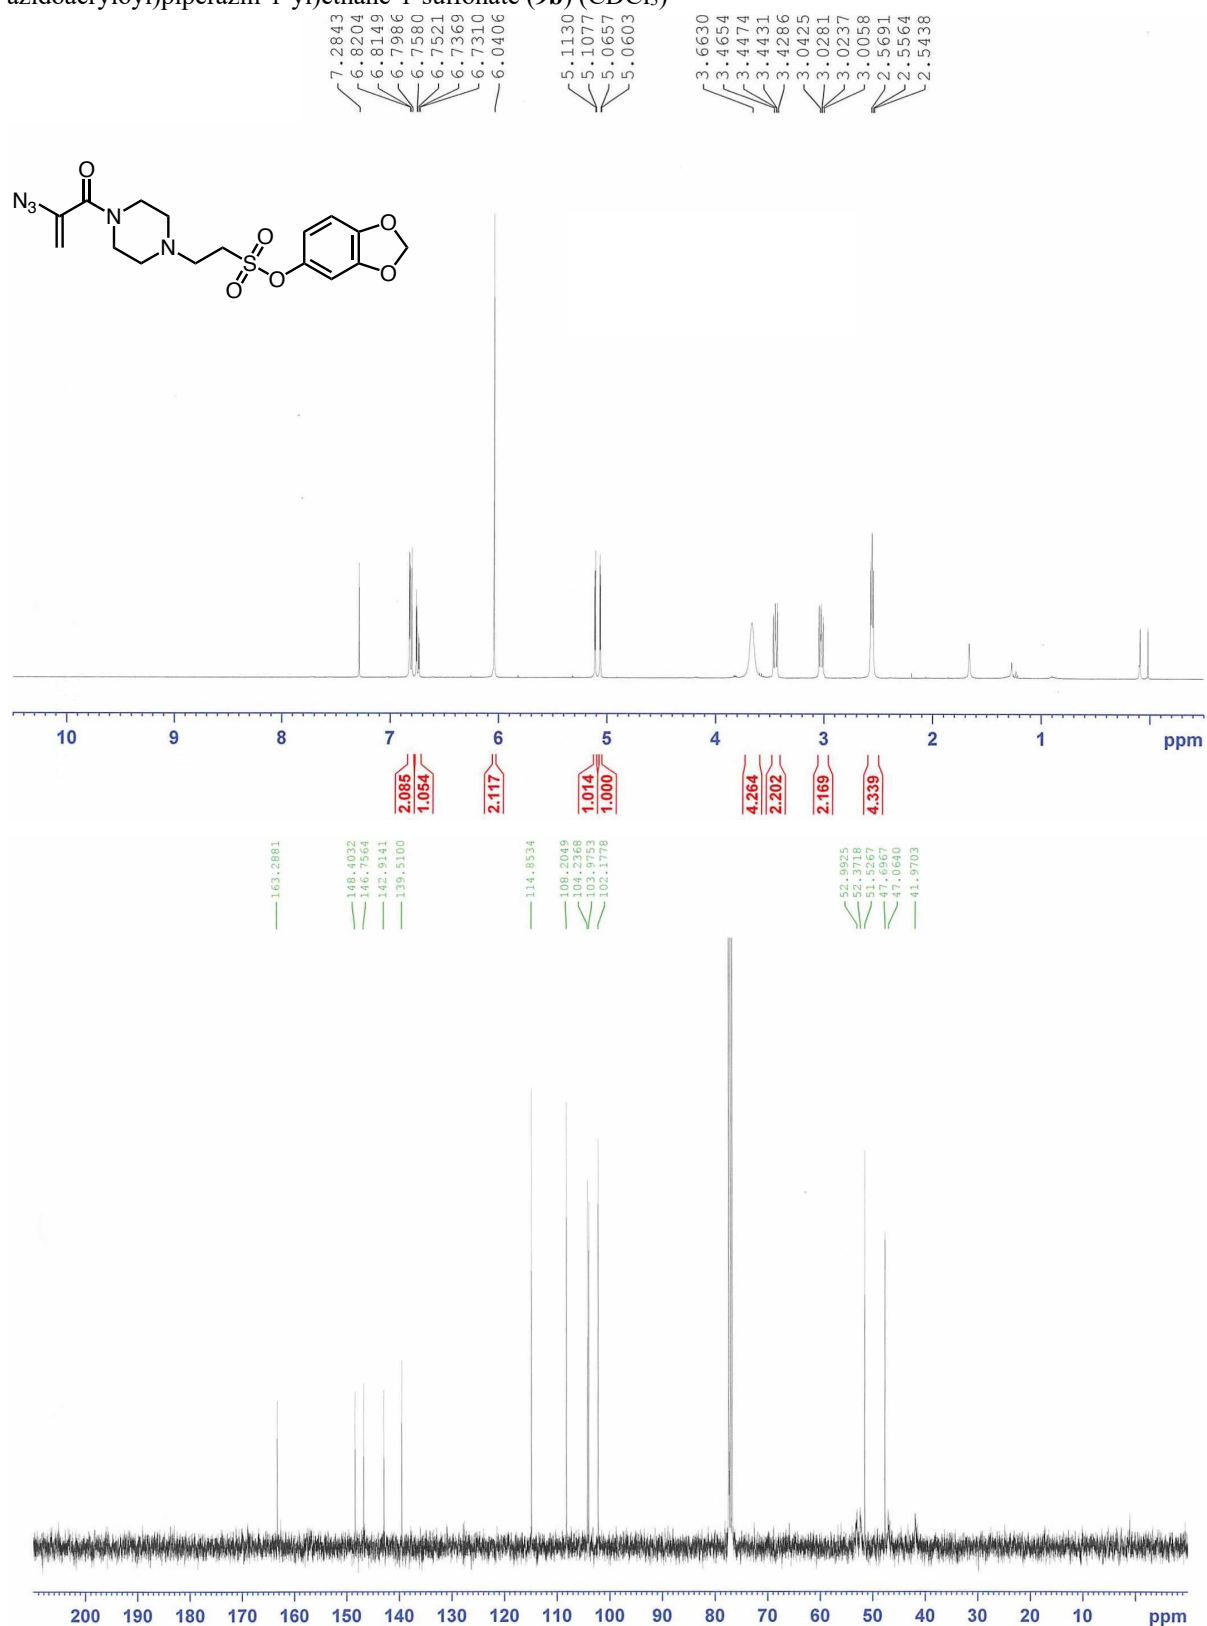



$^1\text{H}$  NMR (400 MHz) and  $^{13}\text{C}$  NMR (101 MHz) spectra of 2-oxo-2*H*-chromen-7-yl 2-(4-(2-azidoacryloyl)piperazin-1-yl)ethane-1-sulfonate (**9c**) ( $\text{CDCl}_3$ )

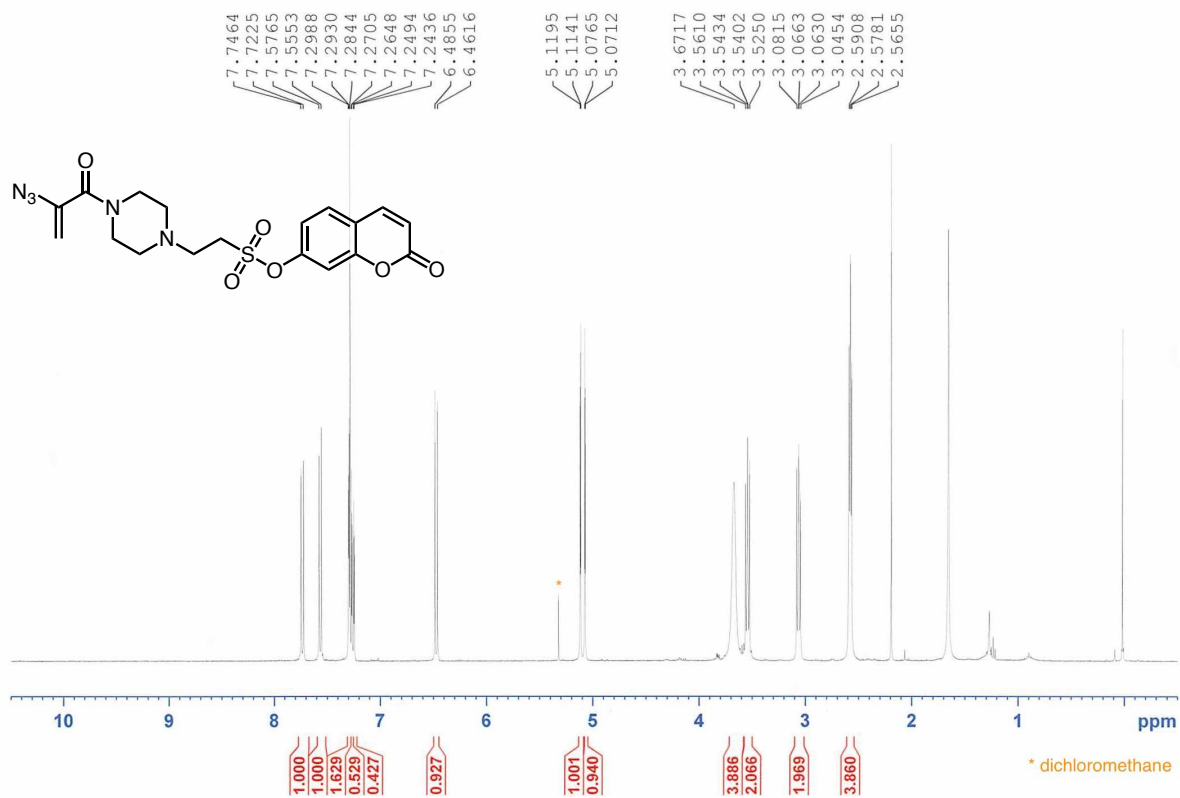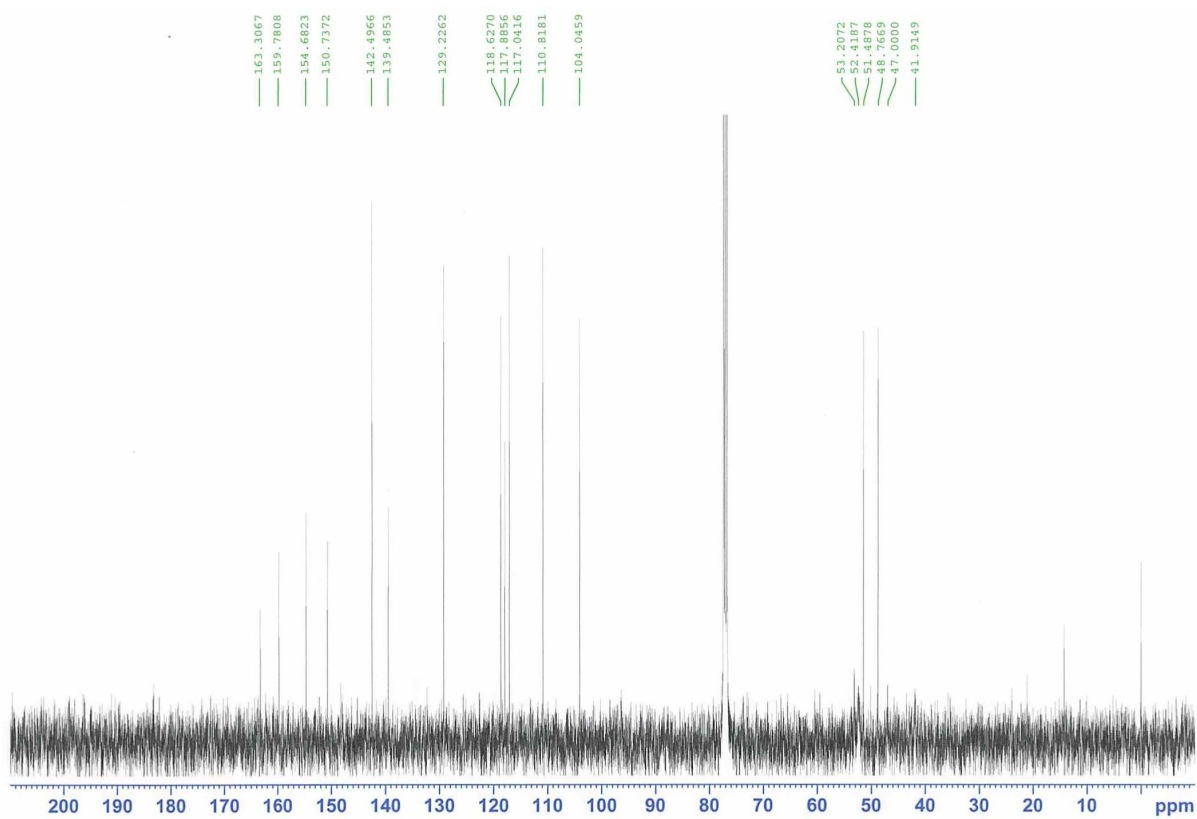

$^1\text{H}$  NMR (400 MHz) and  $^{13}\text{C}$  NMR (101 MHz) spectra of 2,6-dimethoxyphenyl 2-(4-(2-azidoacryloyl)piperazin-1-yl)ethane-1-sulfonate (**9d**) ( $\text{CDCl}_3$ )

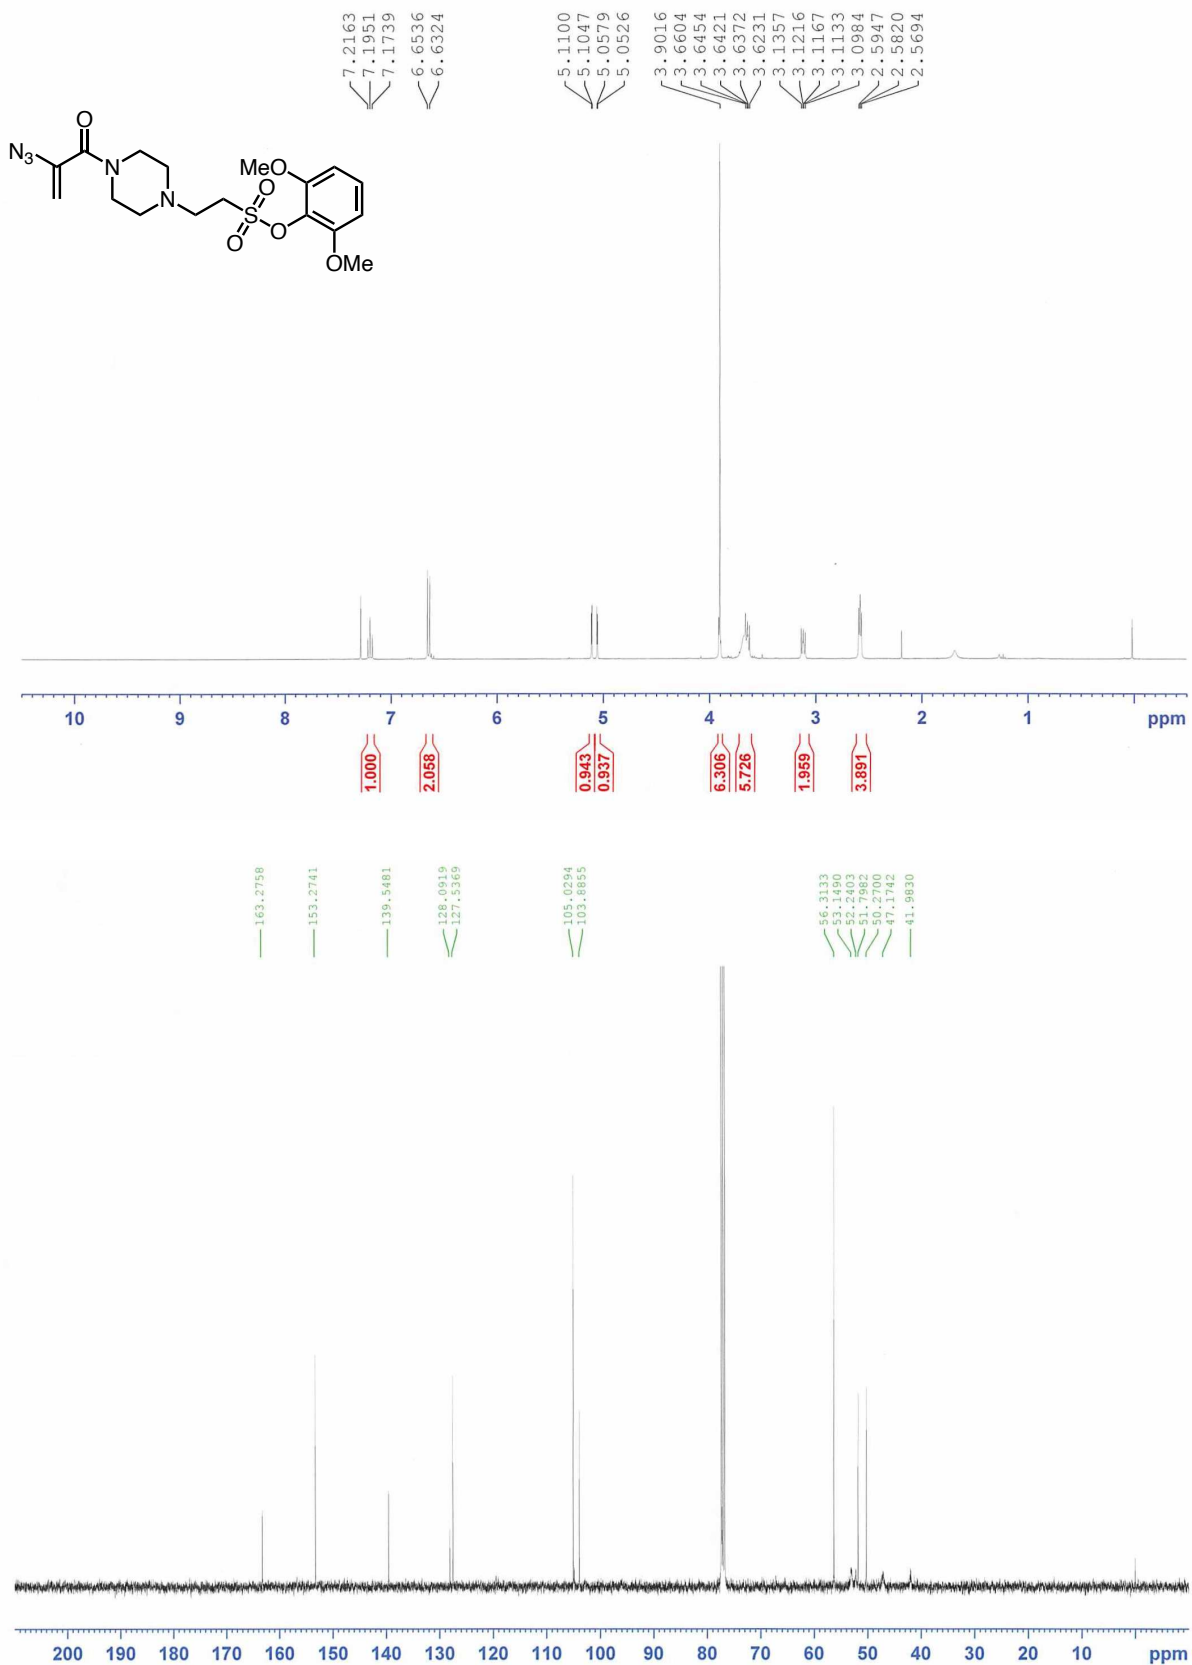

$^1\text{H}$  NMR (400 MHz) and  $^{13}\text{C}$  NMR (101 MHz) spectra of (8*R*,9*S*,13*S*,14*S*)-17-hydroxy-13-methyl-7,8,9,11,12,13,14,15,16,17-decahydro-6*H*-cyclopenta[*a*]phenanthren-3-yl 2-(4-(2-azidoacryloyl)piperazin-1-yl)ethane-1-sulfonate (**9e**) ( $\text{CDCl}_3$ )

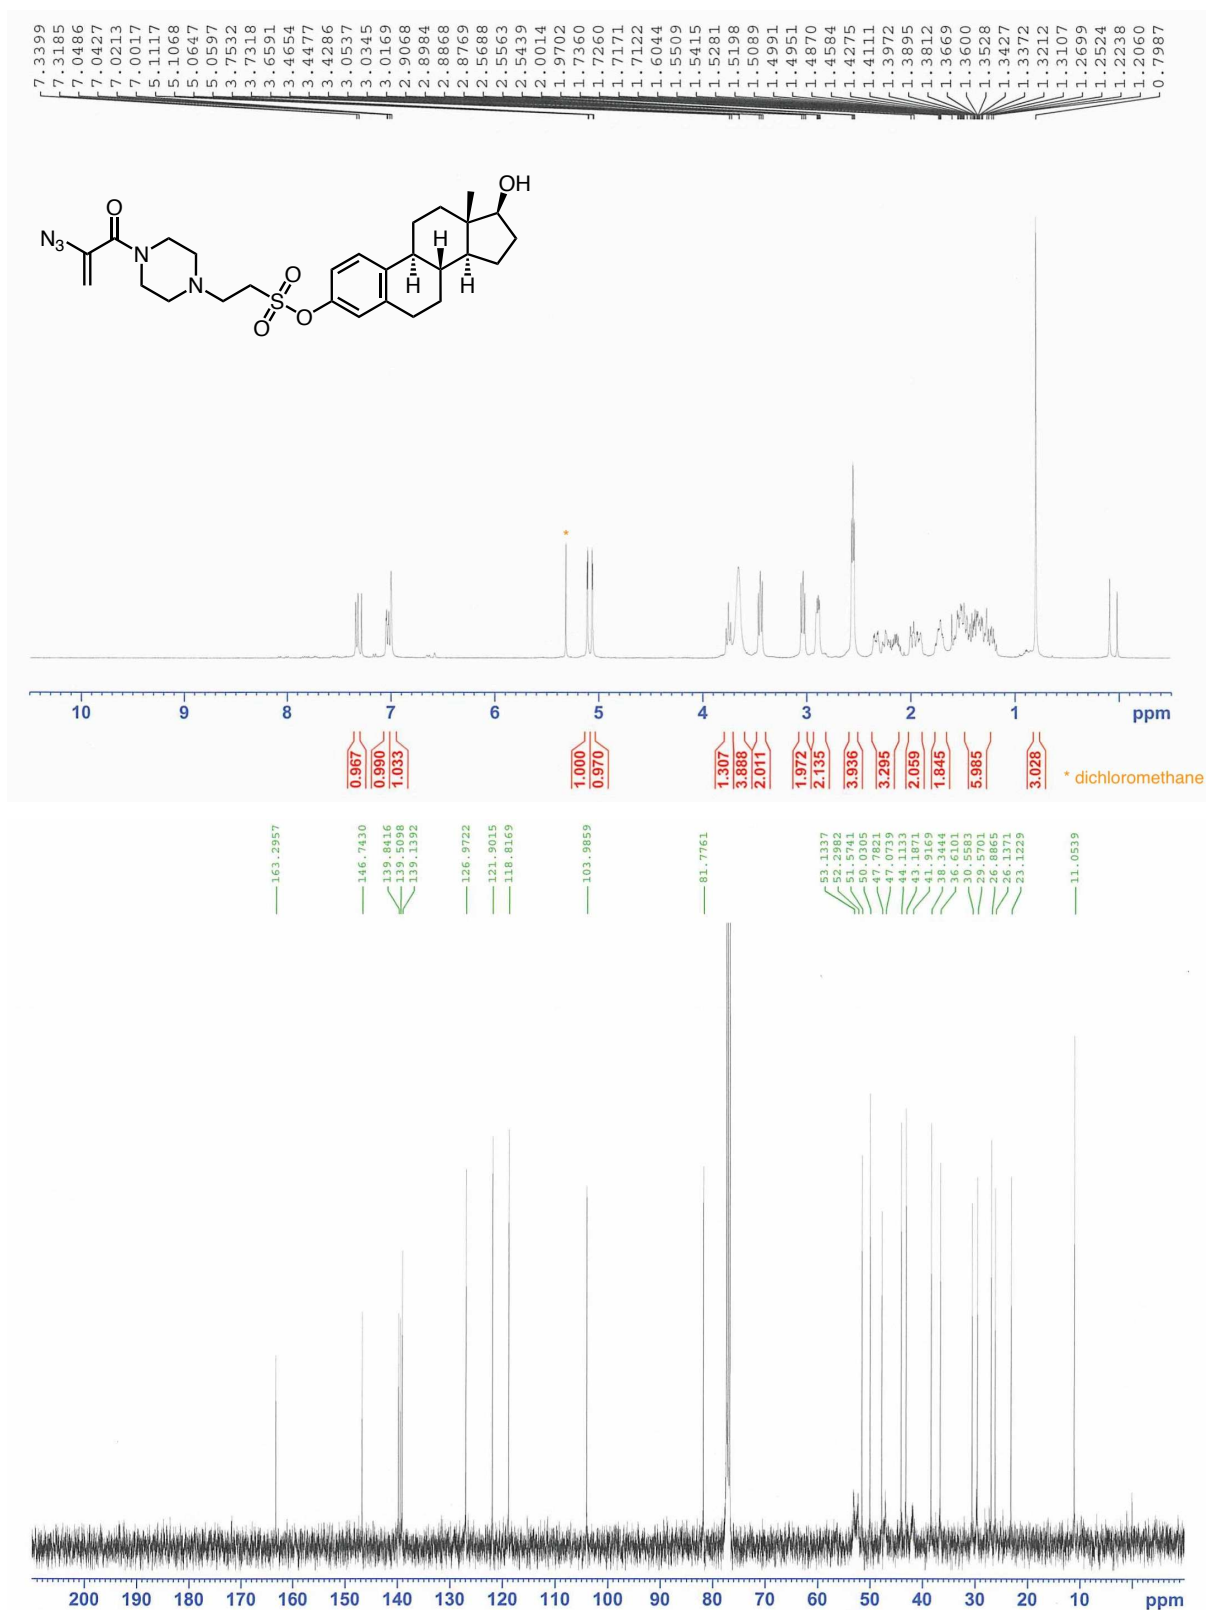

$^1\text{H}$  NMR (400 MHz) and  $^{13}\text{C}$  NMR (101 MHz) spectra of 4-acetamidophenyl 2-(4-(2-azidoacryloyl)piperazin-1-yl)ethane-1-sulfonate (**9f**) ( $\text{CDCl}_3$ )

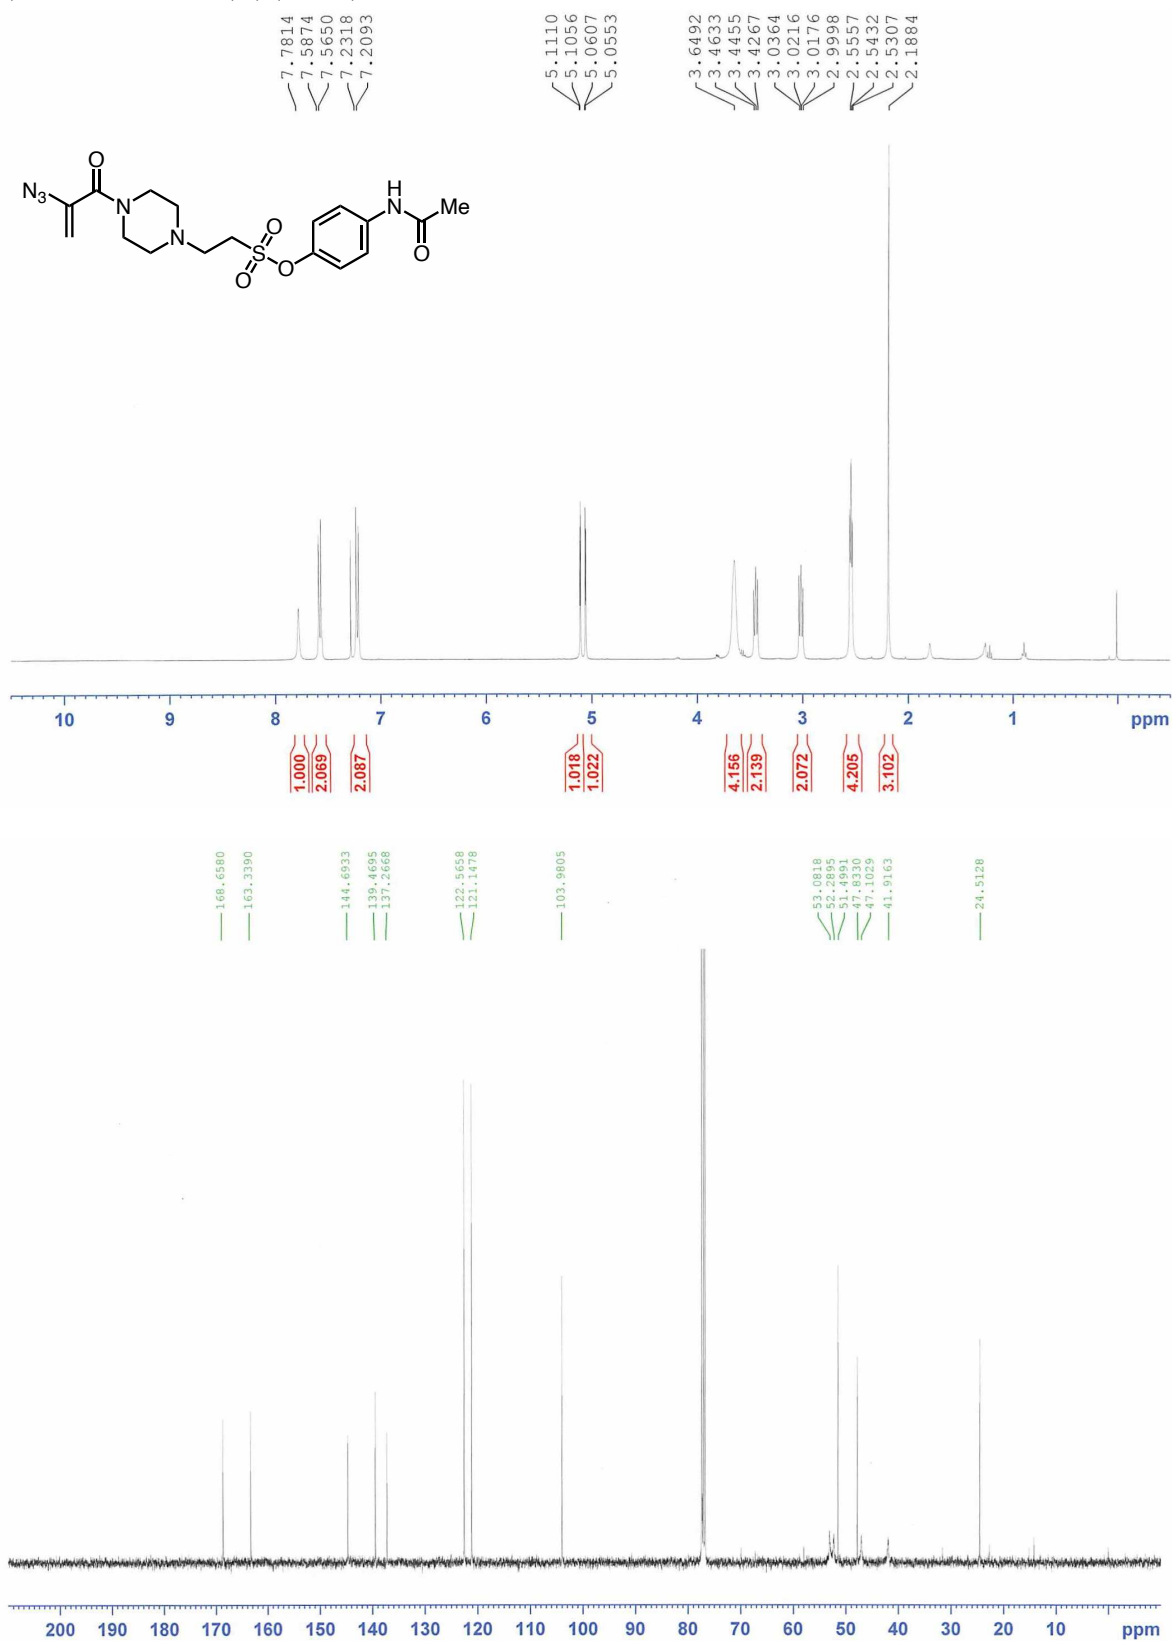

$^1\text{H}$  NMR (400 MHz) and  $^{13}\text{C}$  NMR (101 MHz) spectra of methyl (*S*)-2-amino-3-(4-(((2-(4-(2-azidoacryloyl)piperazin-1-yl)ethyl)sulfonyl)oxy)phenyl)propanoate (**9g**) ( $\text{CDCl}_3$ )

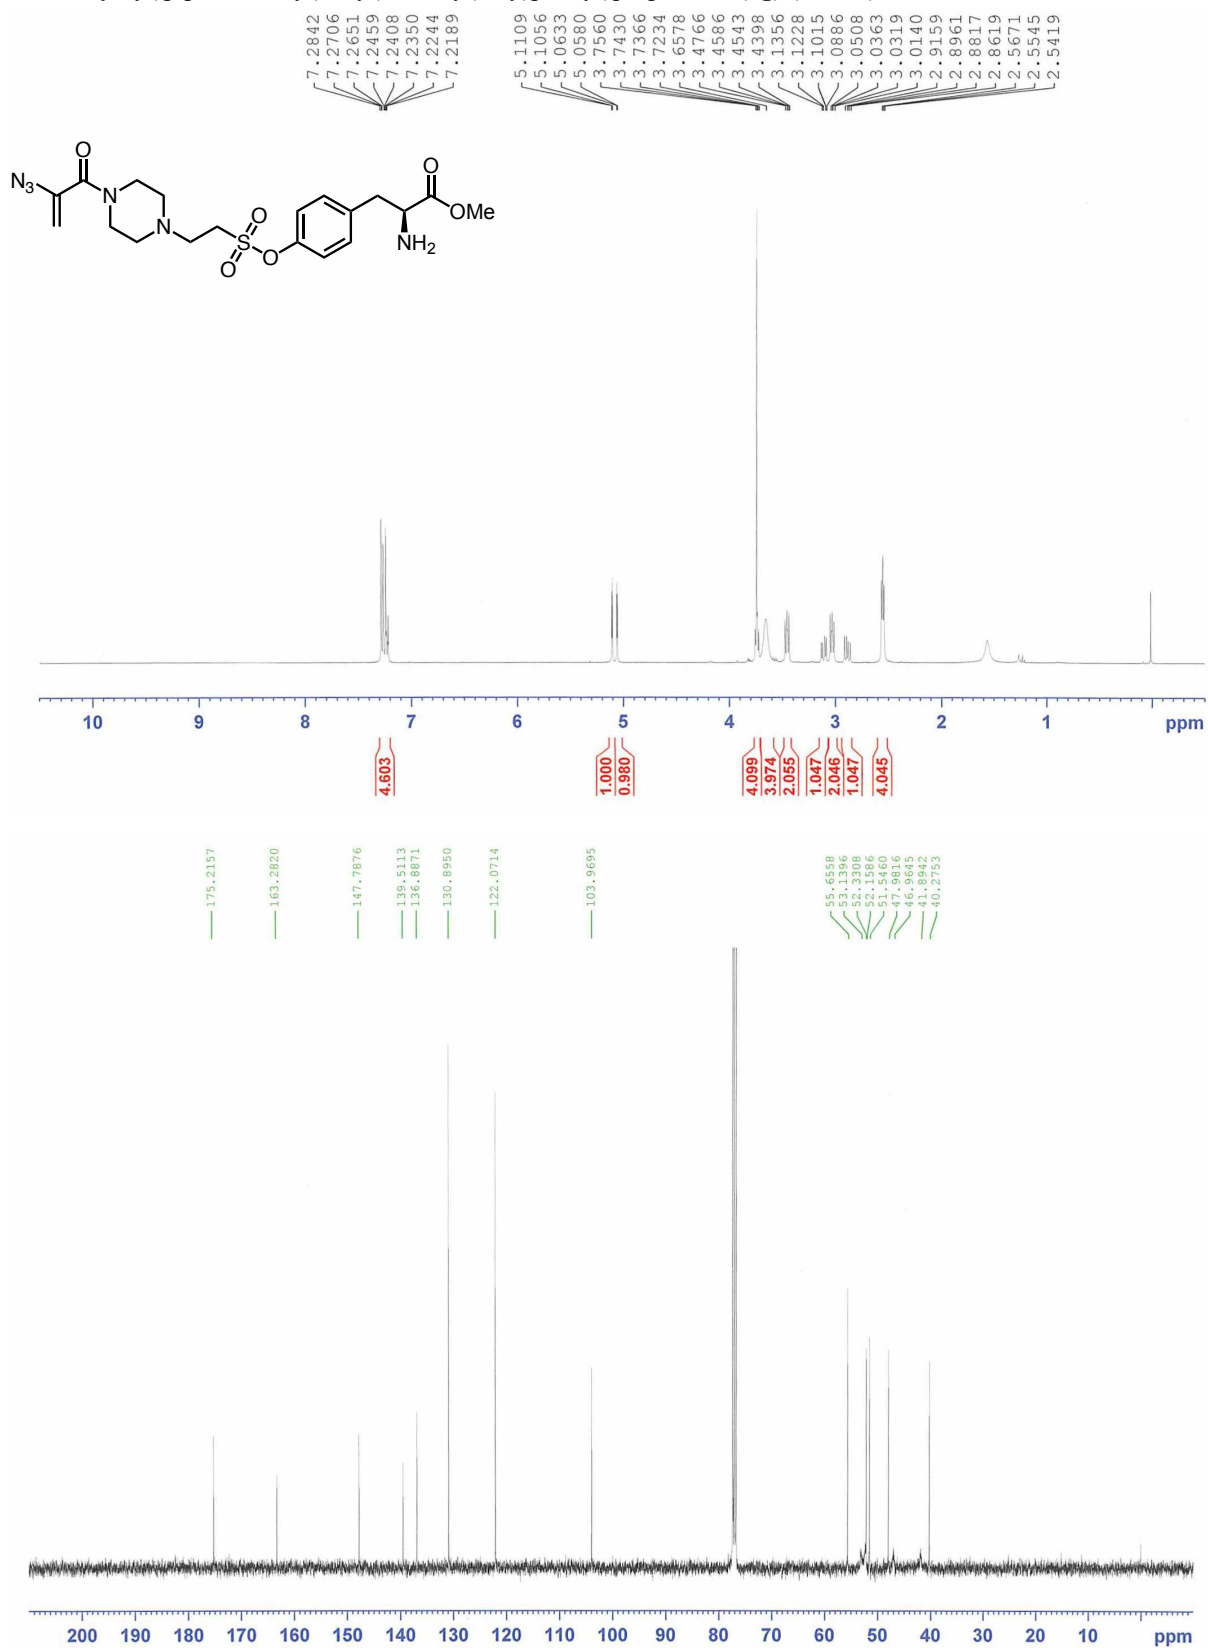

$^1\text{H}$  NMR (400 MHz) and  $^{13}\text{C}$  NMR (101 MHz) spectra of 3-aminophenyl 2-(4-(2-azidoacryloyl)piperazin-1-yl)ethane-1-sulfonate (**9h**) ( $\text{CDCl}_3$ )

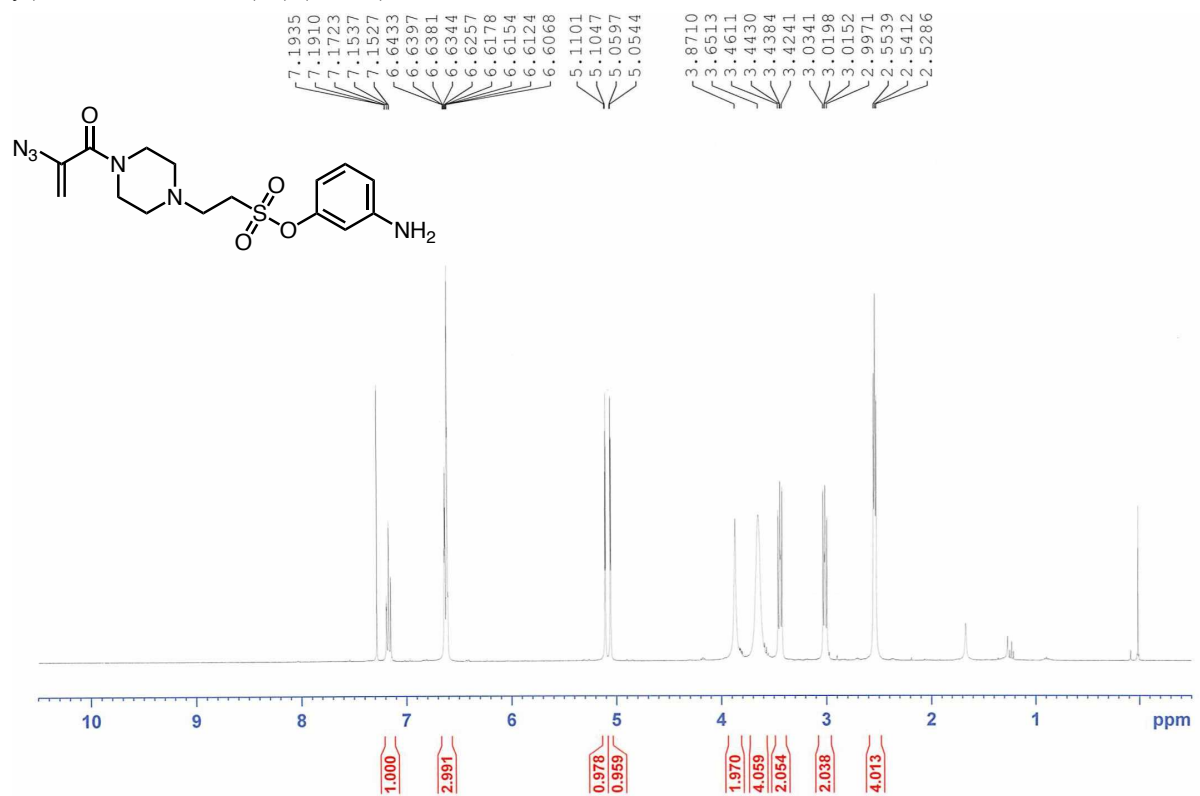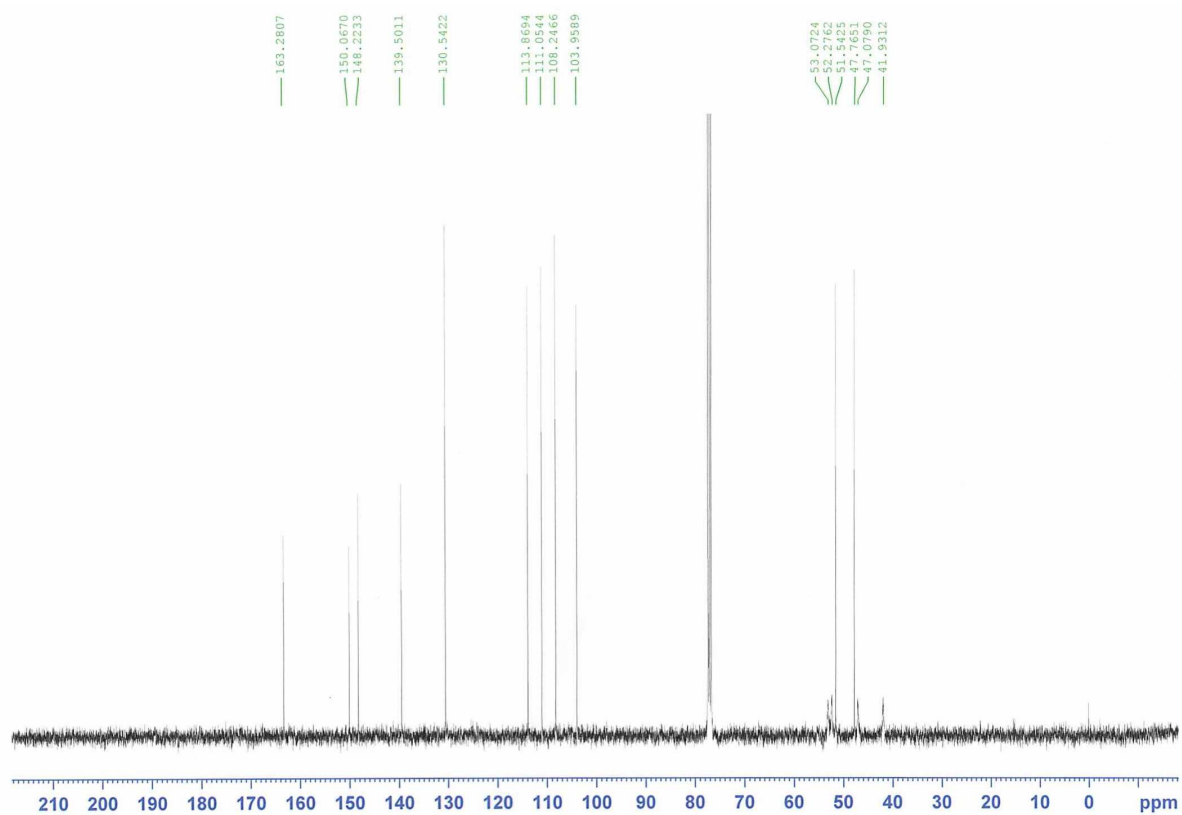

$^1\text{H}$  NMR (400 MHz) and  $^{13}\text{C}$  NMR (101 MHz) spectra of quinolin-5-yl 2-(4-(2-azidoacryloyl)piperazin-1-yl)ethane-1-sulfonate (**9i**) ( $\text{CDCl}_3$ )

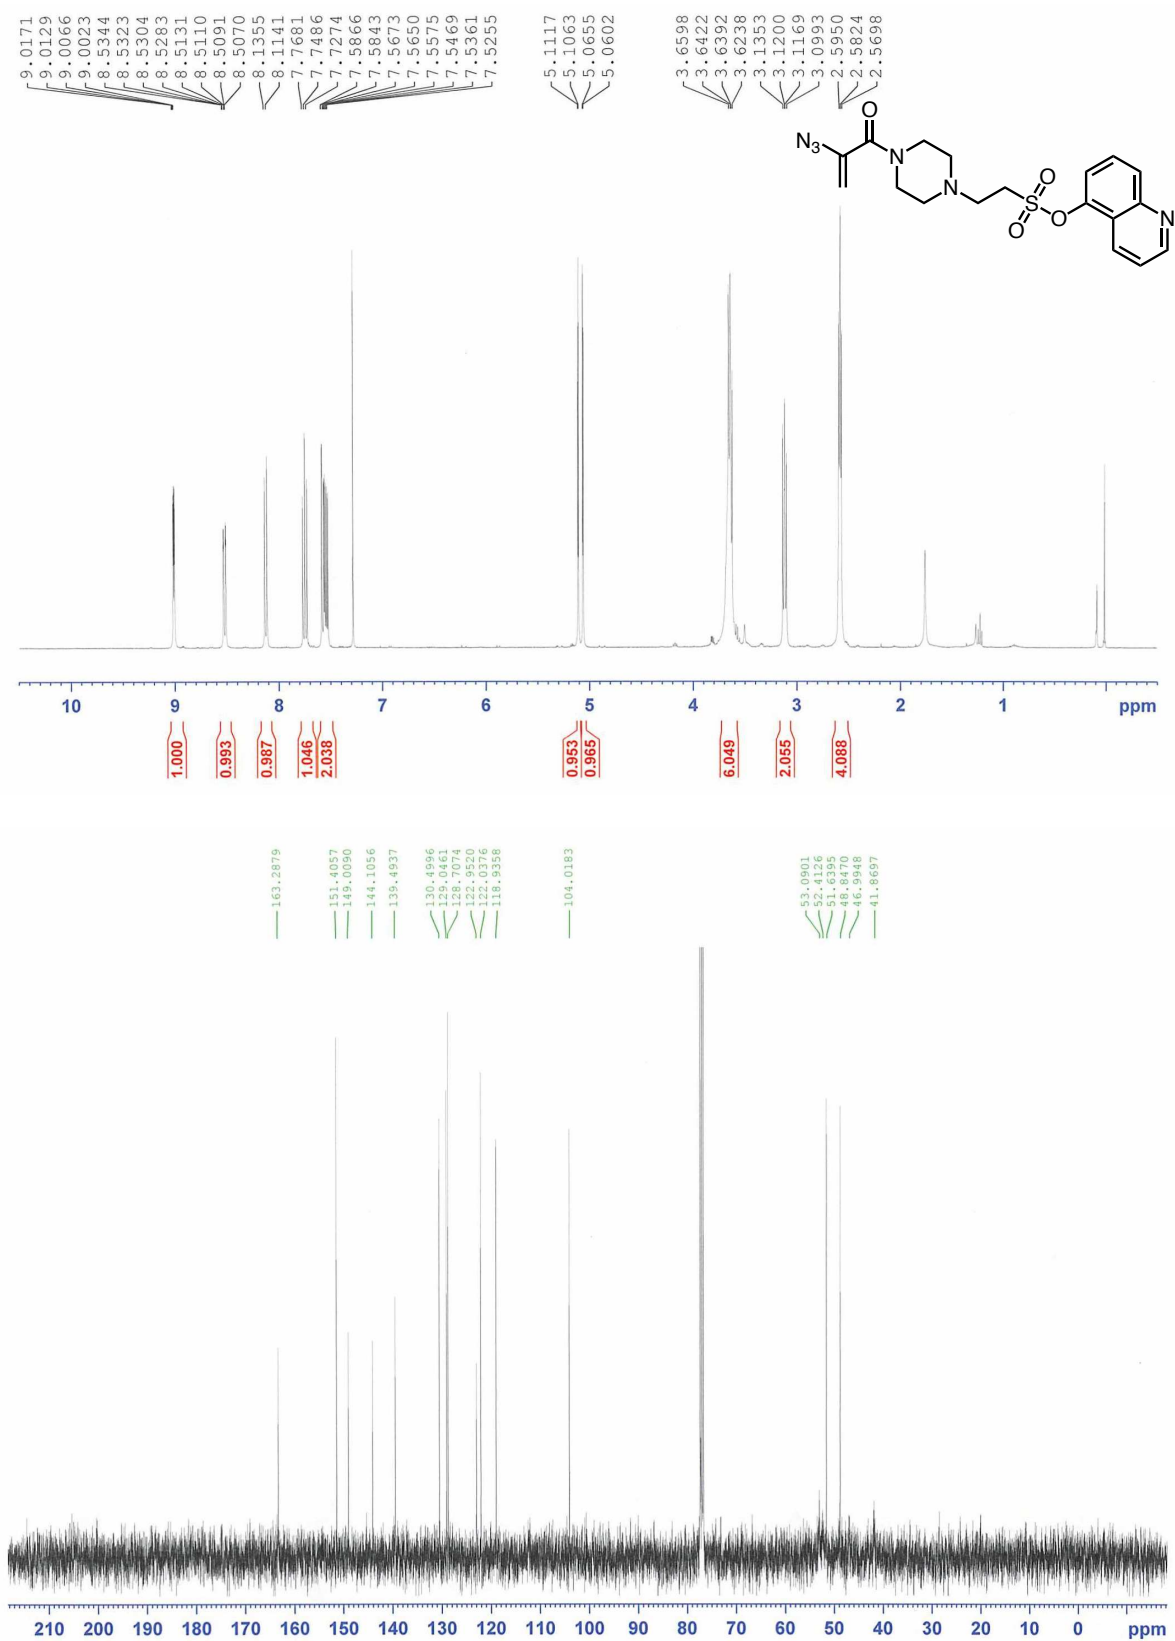

$^1\text{H}$  NMR (400 MHz) and  $^{13}\text{C}$  NMR (101 MHz) spectra of pyridin-2-yl 2-(4-(2-azidoacryloyl)piperazin-1-yl)ethane-1-sulfonate (**9j**) ( $\text{CDCl}_3$ )

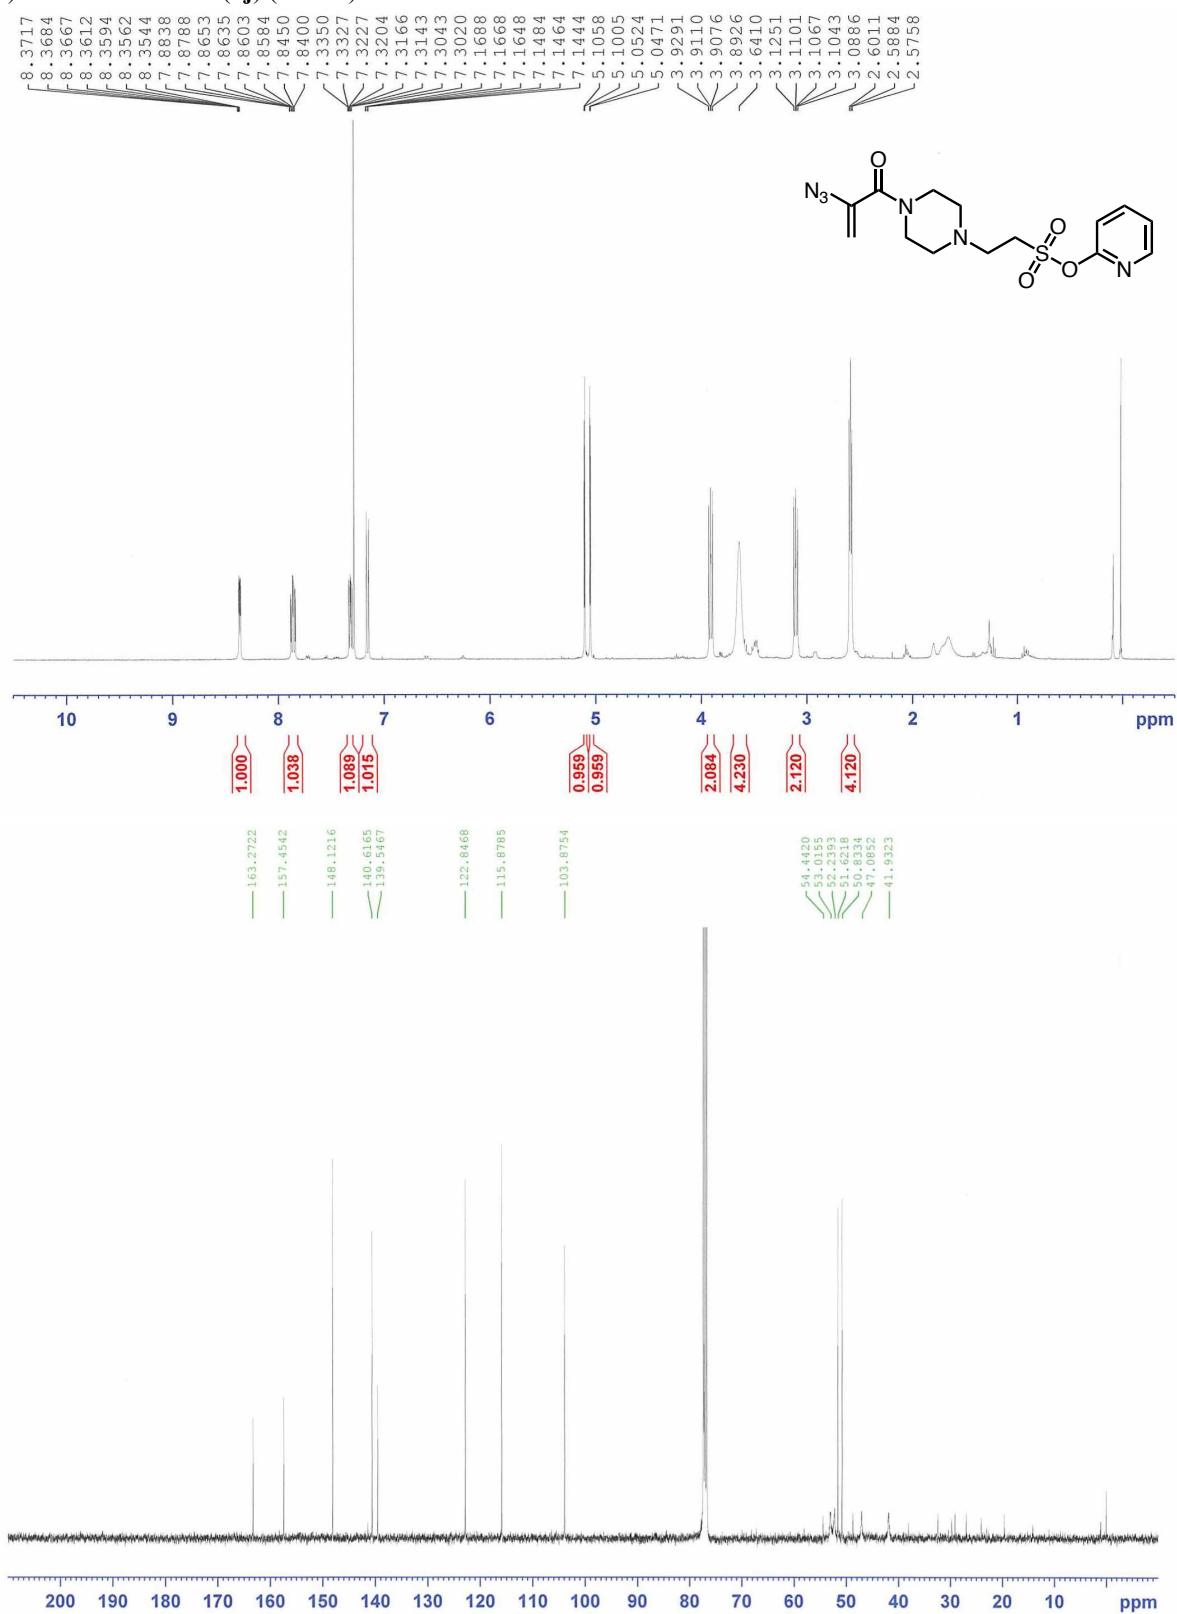



$^1\text{H}$  NMR (400 MHz) and  $^{13}\text{C}$  NMR (101 MHz) spectra of 3,3,4,4,5,5,6,6,6-undecafluorohexyl 2-(4-(2-azidoacryloyl)piperazin-1-yl)ethane-1-sulfonate (**9k**) ( $\text{CDCl}_3$ )

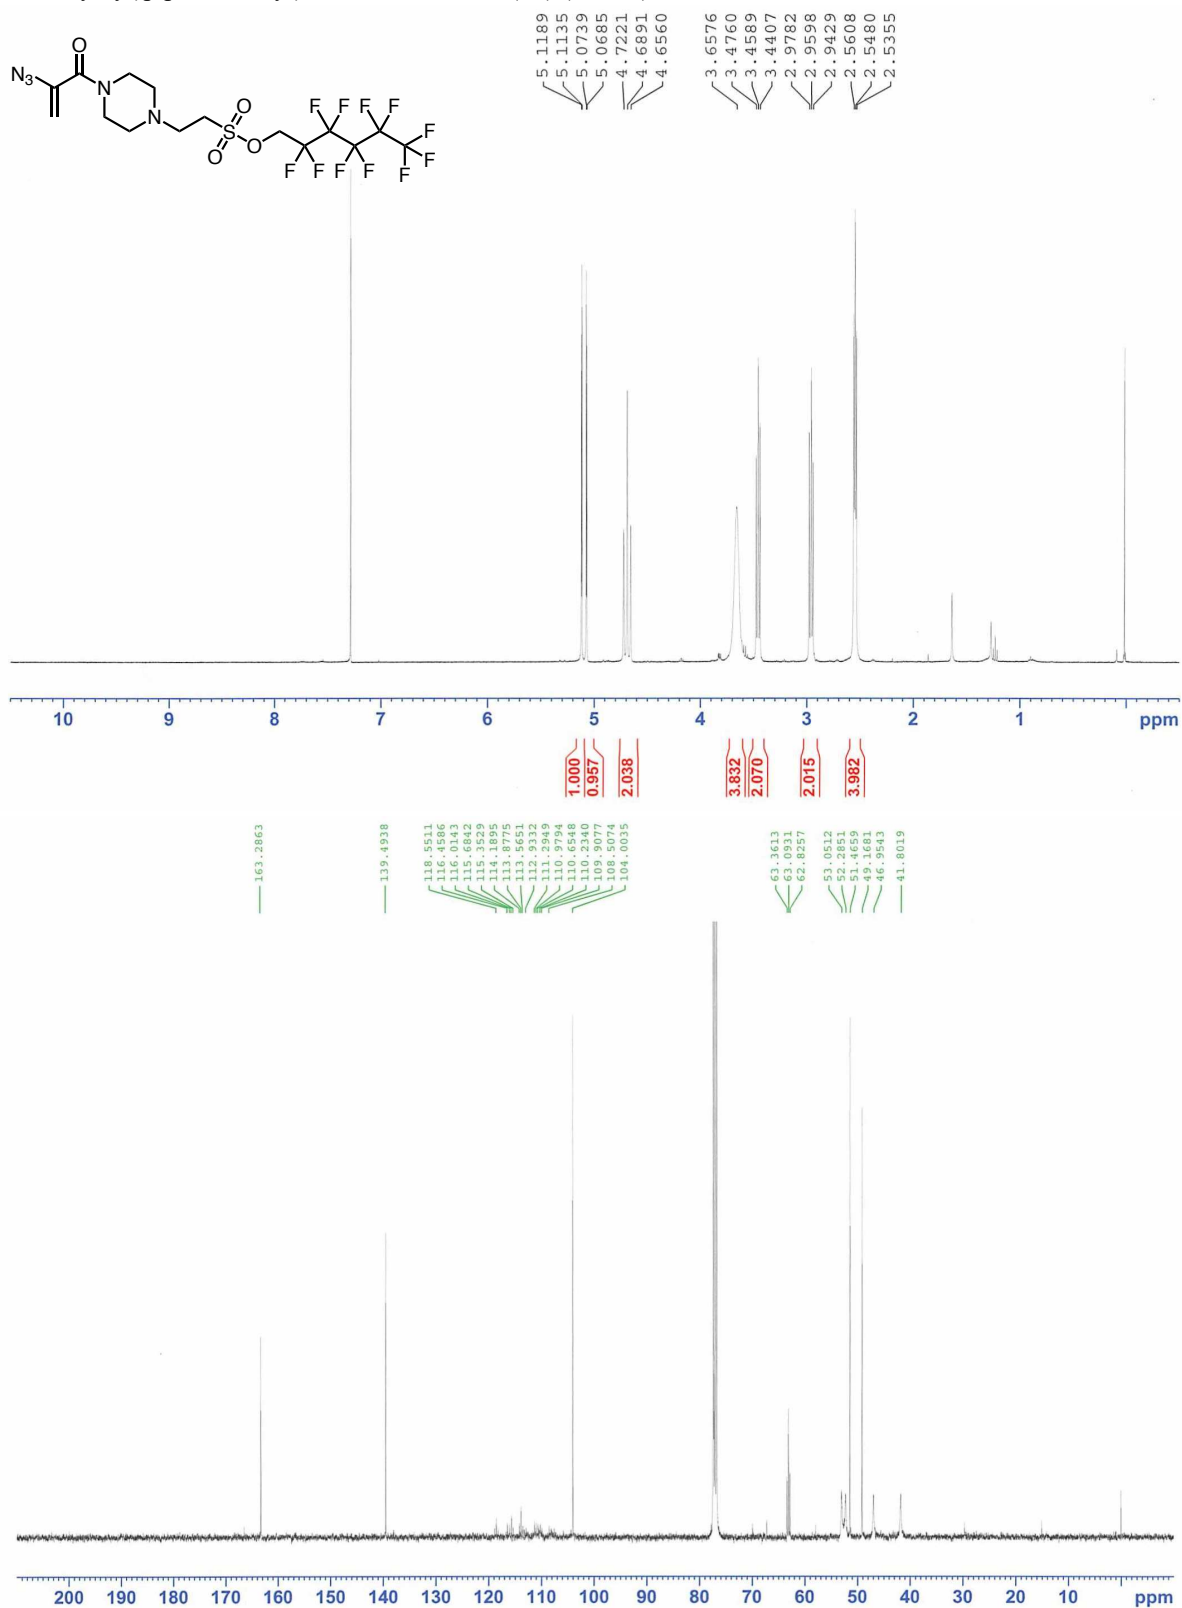

$^1\text{H}$  NMR (400 MHz) and  $^{13}\text{C}$  NMR (101 MHz) spectra of phenyl 2-(4-(2-(4-(2-hydroxypropan-2-yl)-1*H*-1,2,3-triazol-1-yl)acryloyl)piperazin-1-yl)ethane-1-sulfonate (**10b**) ( $\text{CDCl}_3$ )

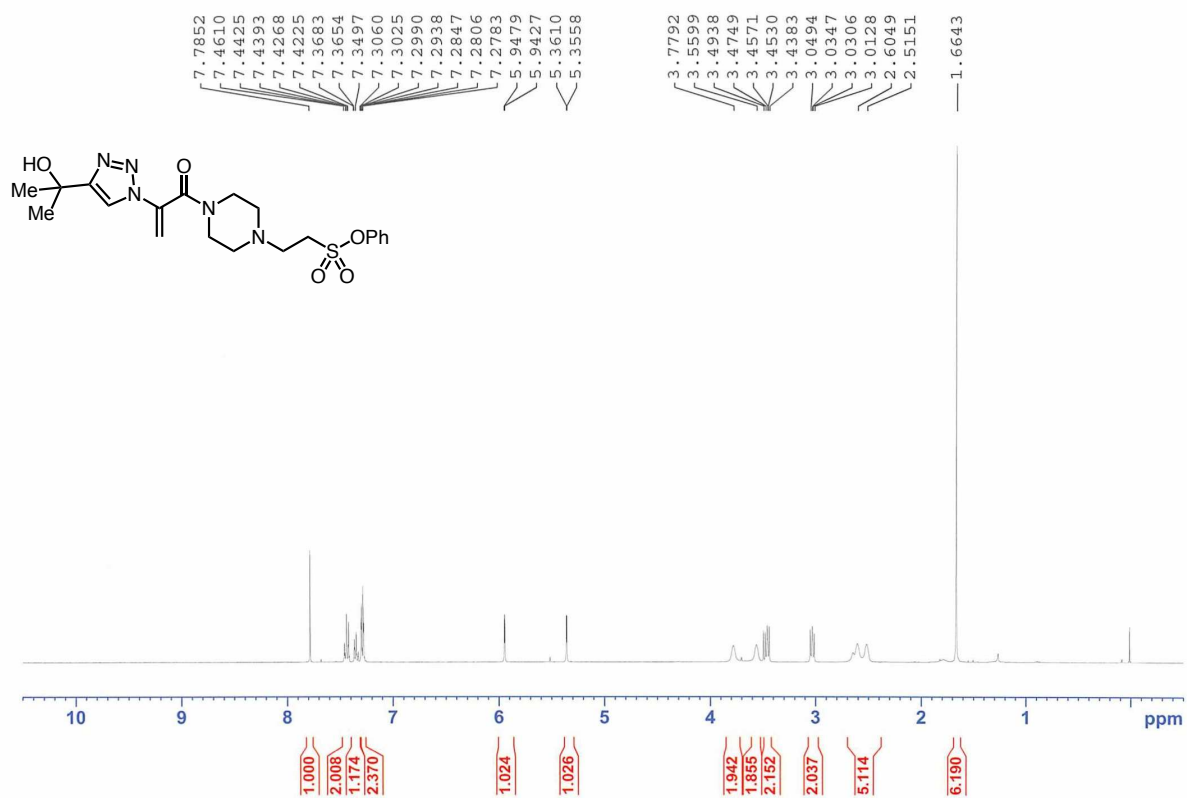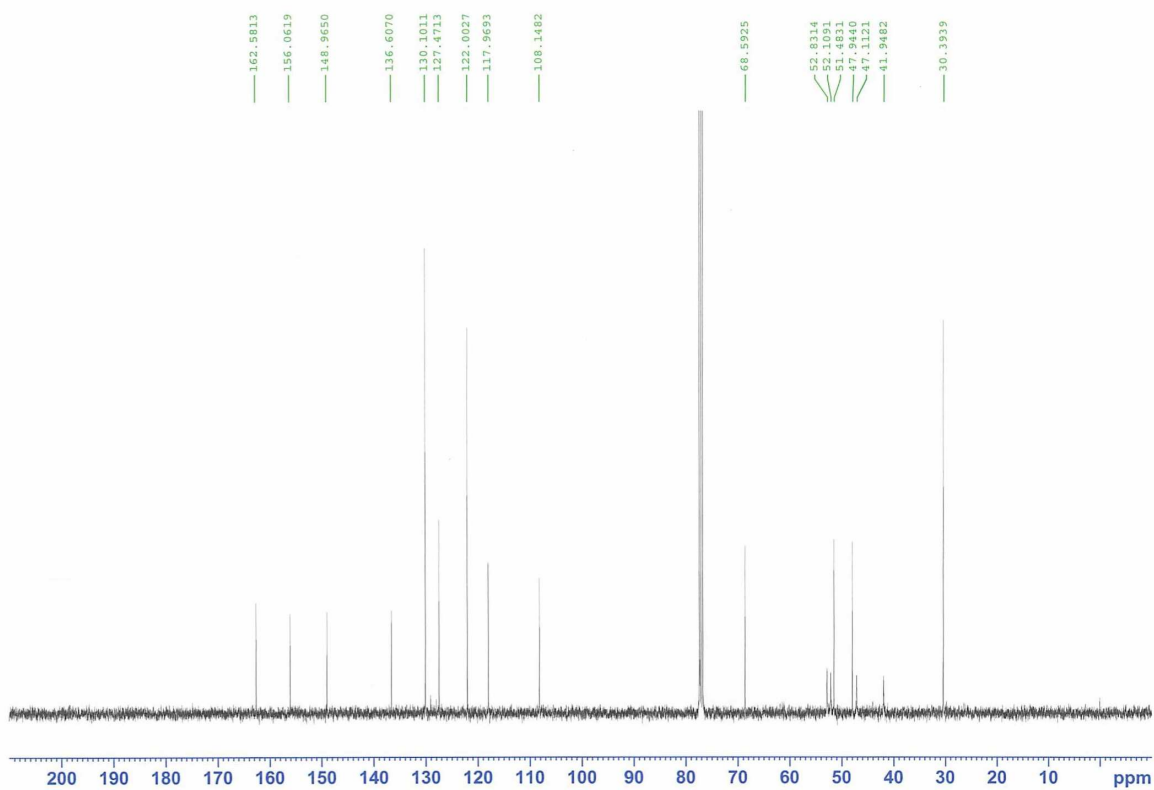

$^1\text{H}$  NMR (400 MHz) and  $^{13}\text{C}$  NMR (101 MHz) spectra of phenyl 2-(4-(2-(4-(pyridin-2-yl)-1*H*-1,2,3-triazol-1-yl)acryloyl)piperazin-1-yl)ethane-1-sulfonate (**10c**) ( $\text{CDCl}_3$ )

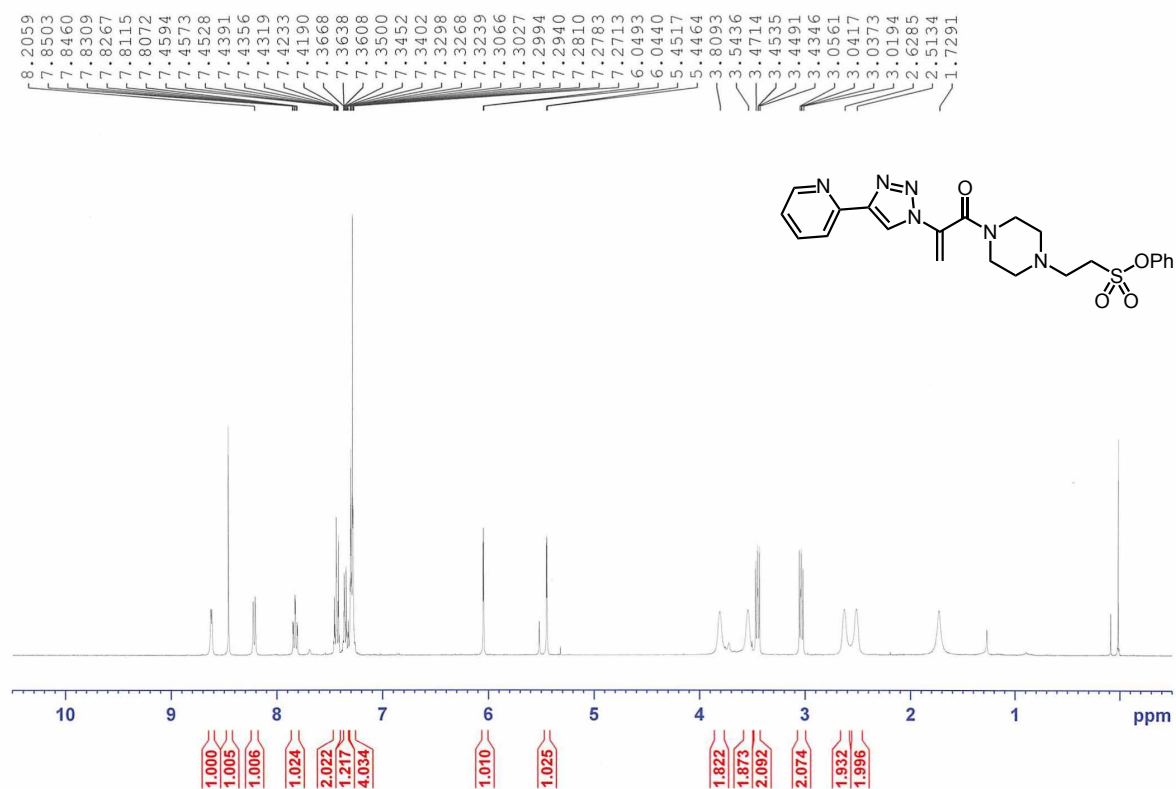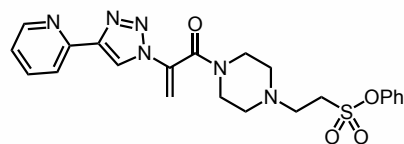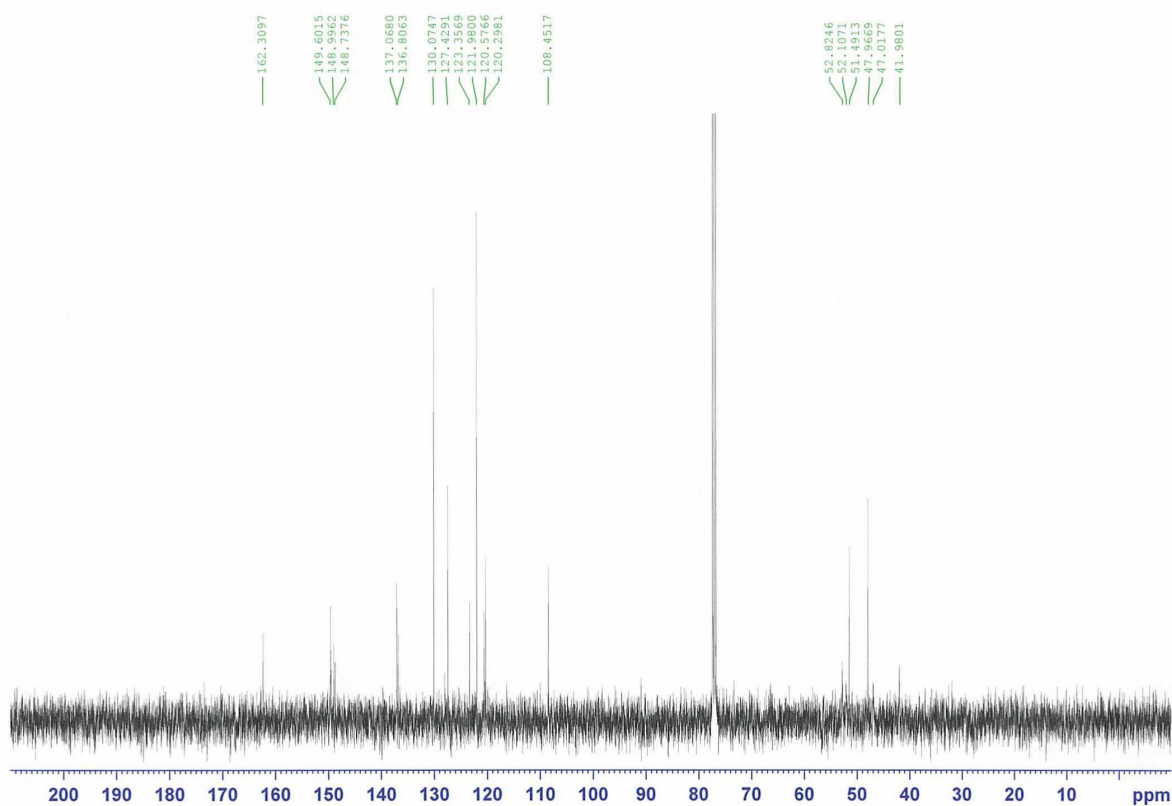

$^1\text{H}$  NMR (400 MHz) and  $^{13}\text{C}$  NMR (101 MHz) spectra of phenyl 2-(4-(2-(4-((2-iodo-3-((trifluoromethyl)sulfonyl)oxy)phenoxy)methyl)-1*H*-1,2,3-triazol-1-yl)acryloyl)piperazin-1-yl)ethane-1-sulfonate (**10d**) ( $\text{CDCl}_3$ )

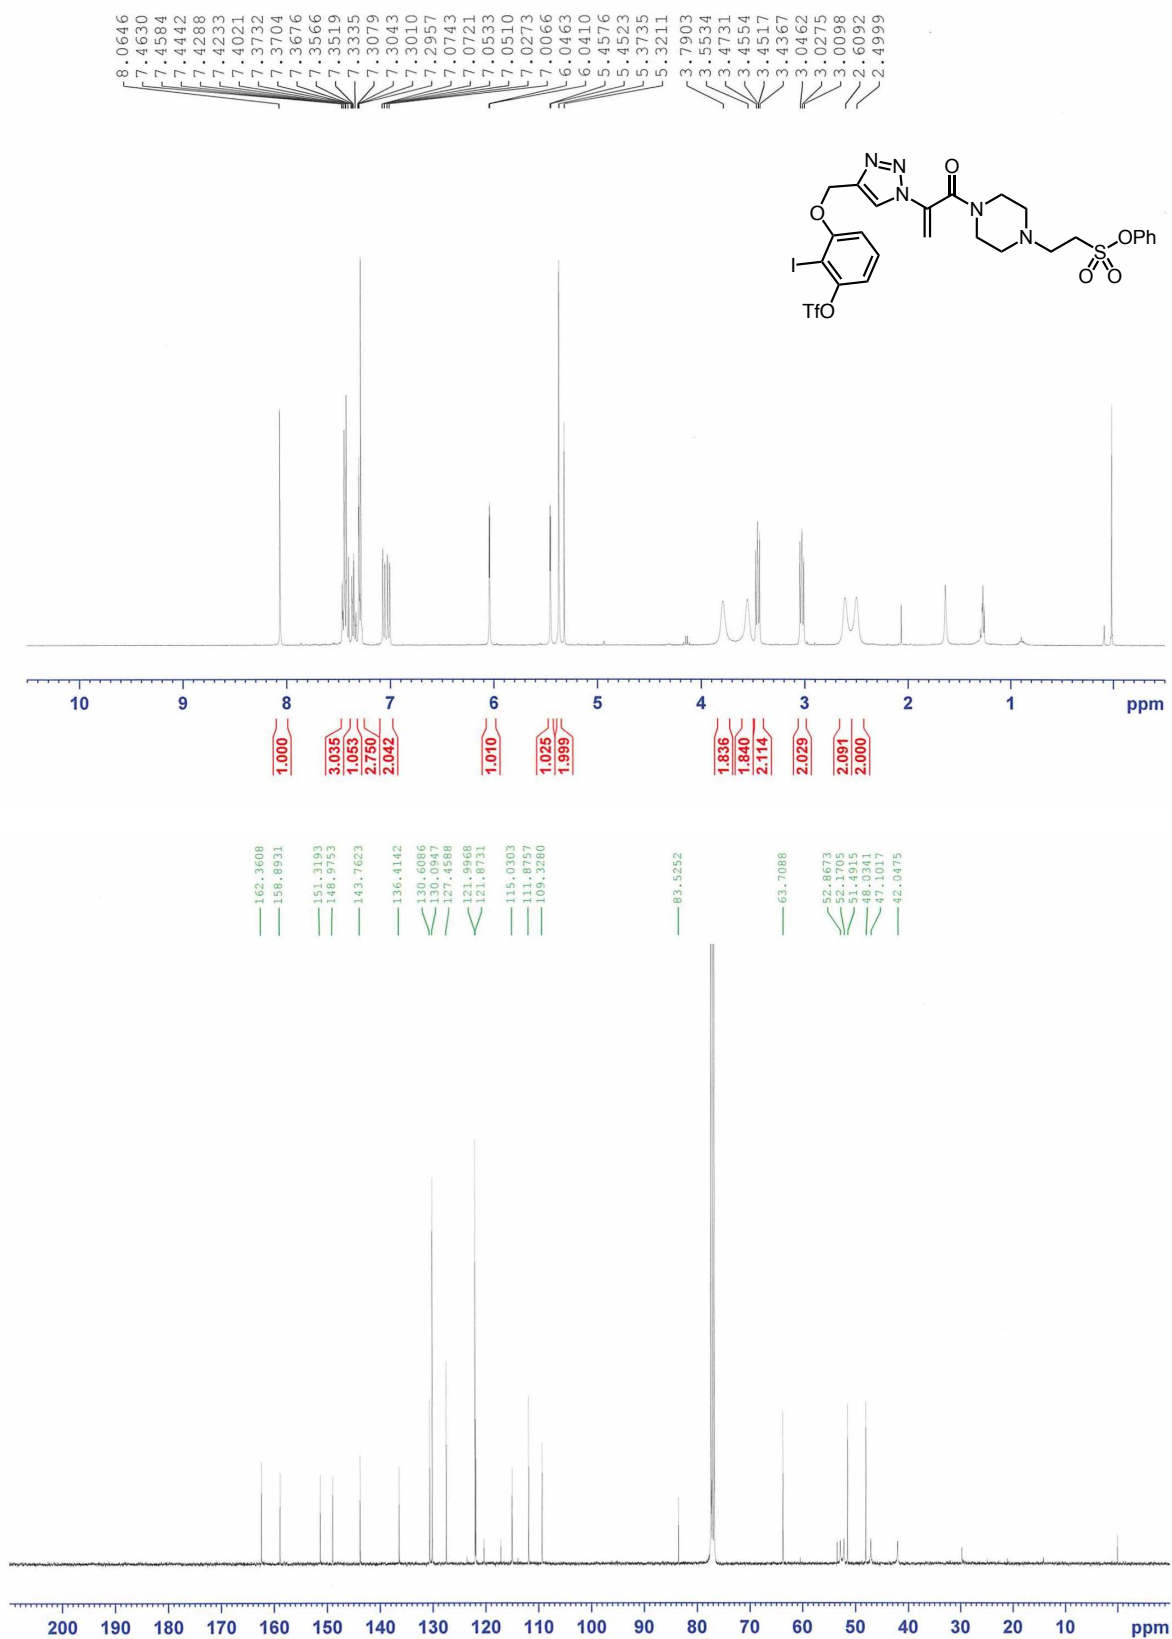

$^1\text{H}$  NMR (400 MHz) and  $^{13}\text{C}$  NMR (101 MHz) spectra of phenyl 2-(4-(2-(4-((4-formylphenoxy)methyl)-1*H*-1,2,3-triazol-1-yl)acryloyl)piperazin-1-yl)ethane-1-sulfonate (**10e**) ( $\text{CDCl}_3$ )

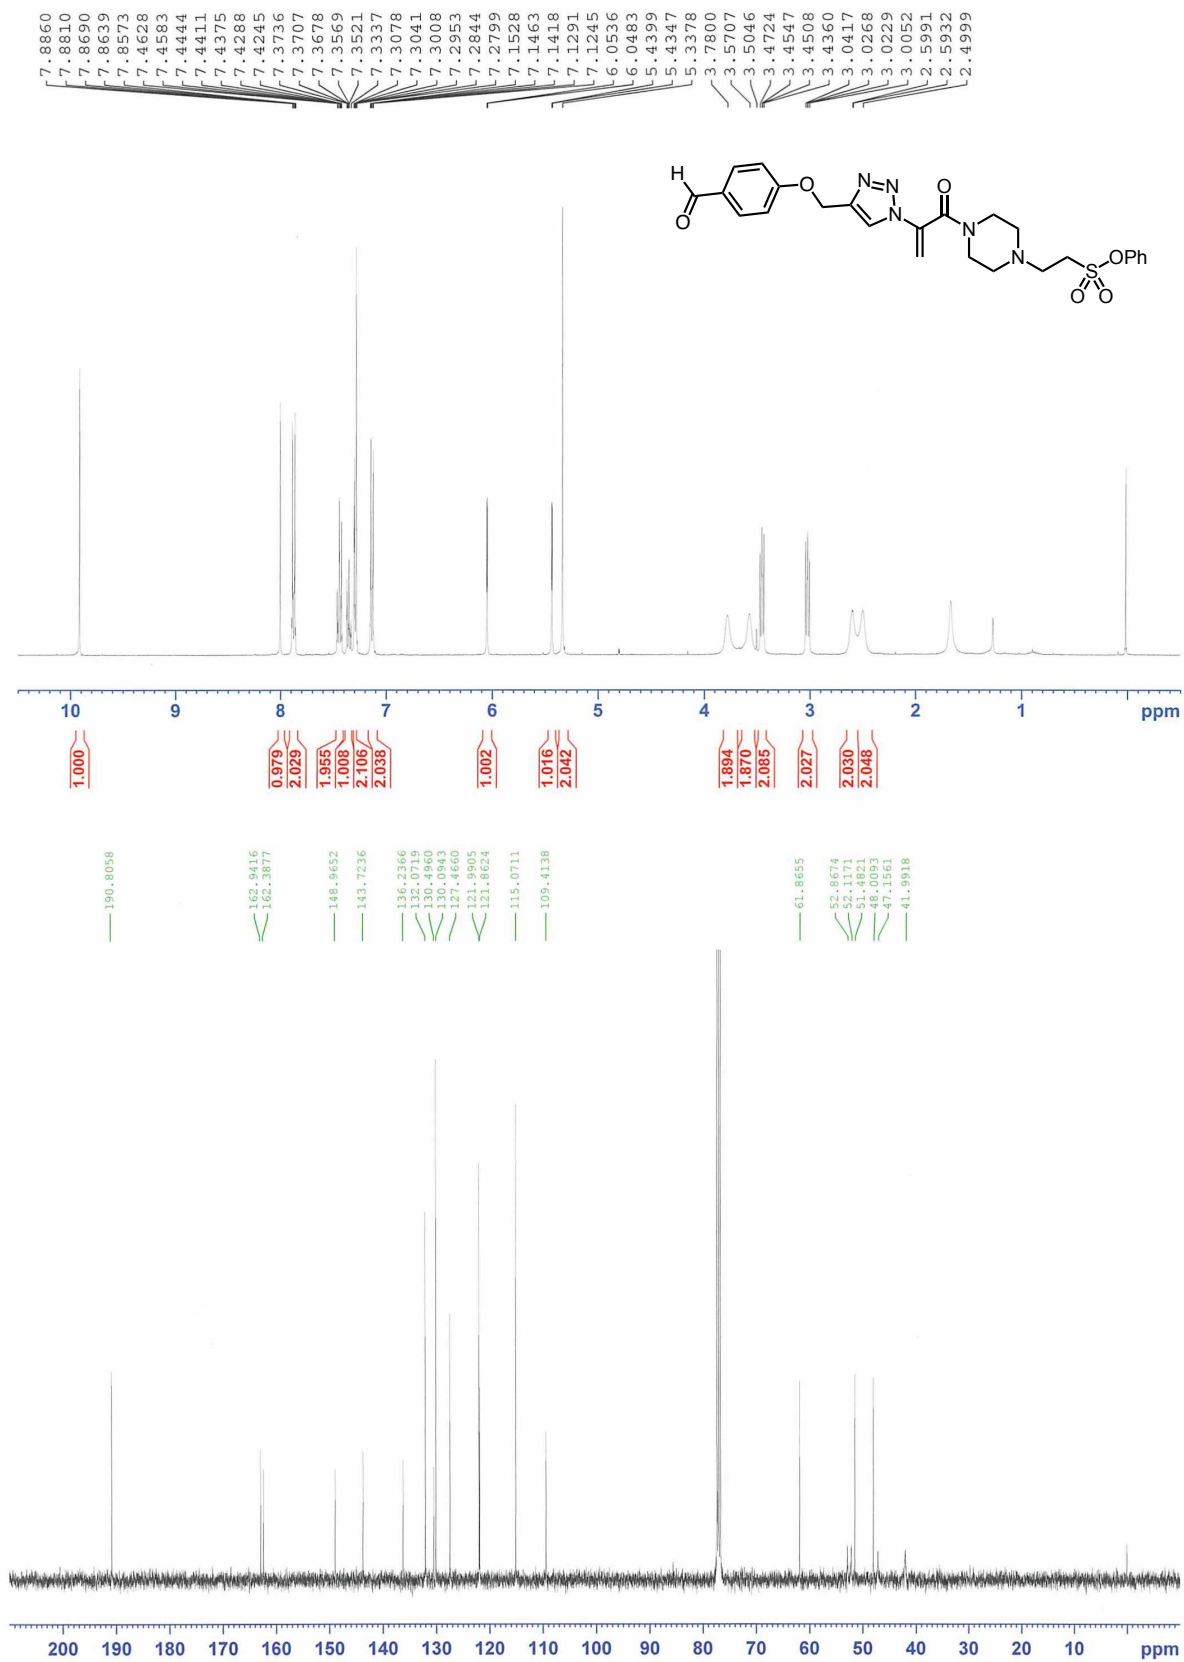

<sup>1</sup>H NMR (400 MHz) and <sup>13</sup>C NMR (101 MHz) spectra of phenyl 2-(4-(2-(4-((ferrocenylcarbonylamino)methyl)-1H-1,2,3-triazol-1-yl)acryloyl)piperazin-1-yl)ethane-1-sulfonate (**10f**) (CDCl<sub>3</sub>)

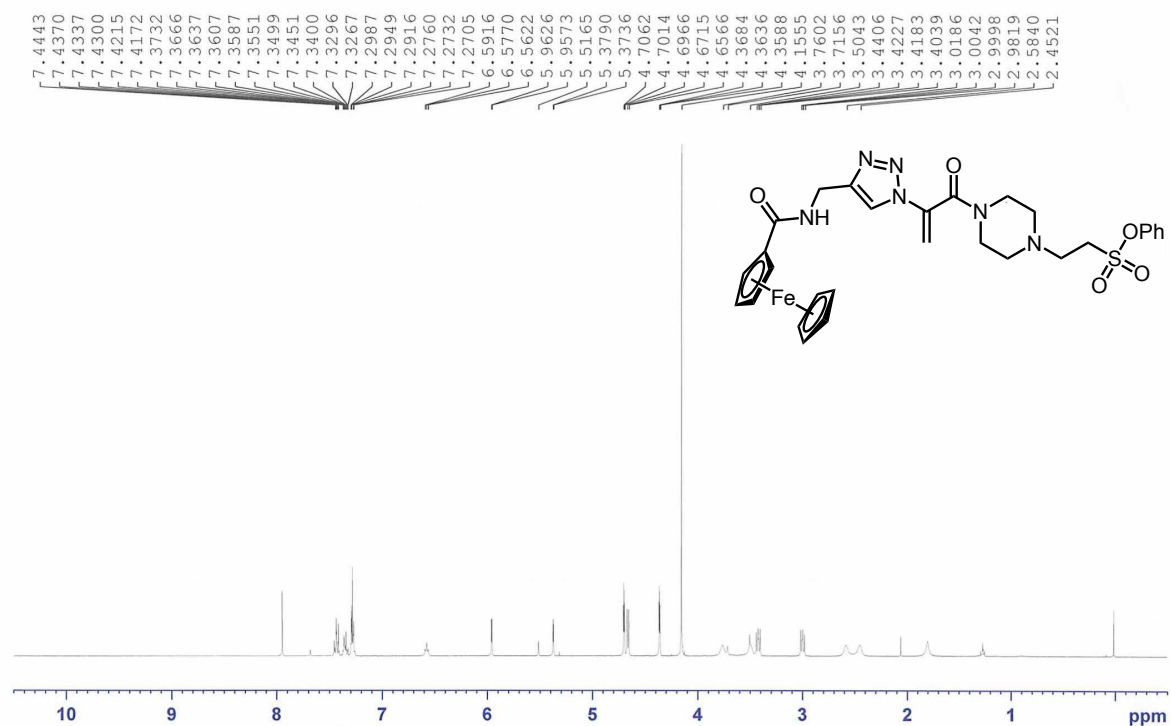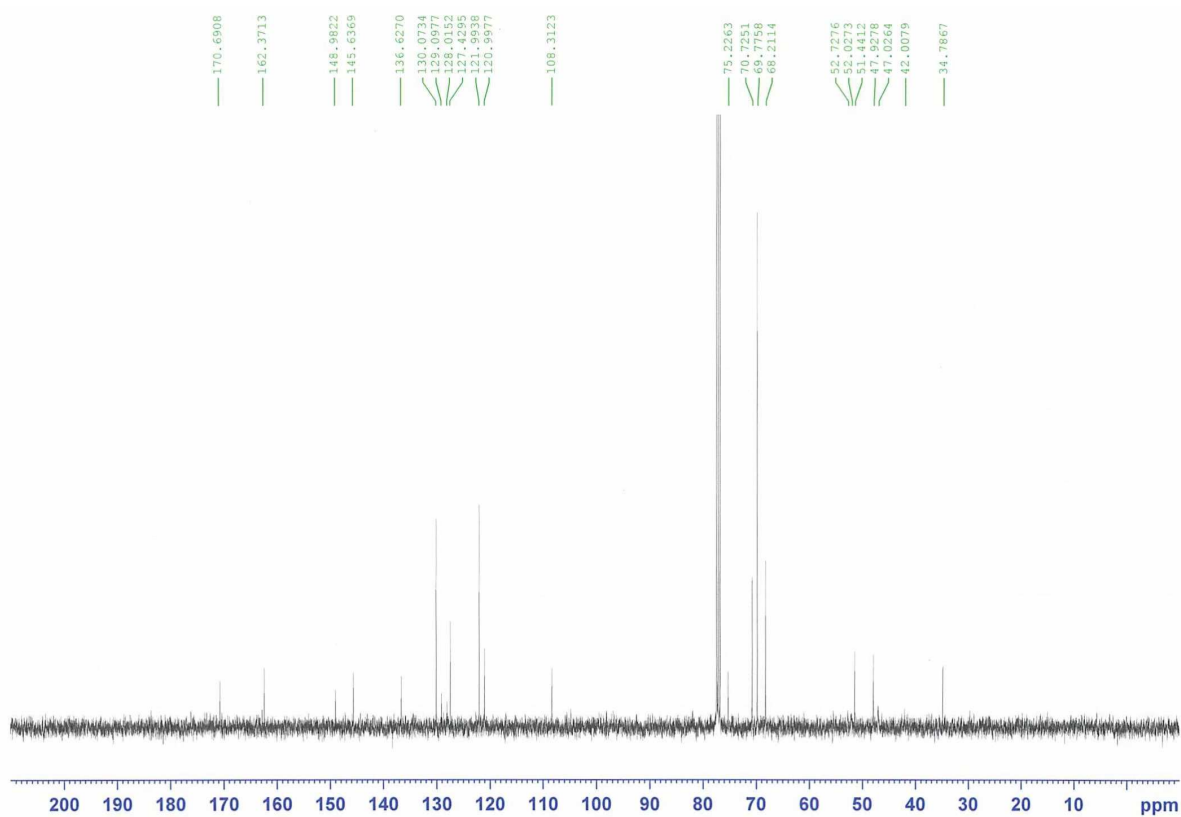

$^1\text{H}$  NMR (400 MHz) and  $^{13}\text{C}$  NMR (101 MHz) spectra of phenyl 2-(4-(2-(4-(1-((2*R*,4*S*,5*R*)-4-hydroxy-5-(hydroxymethyl)tetrahydrofuran-2-yl)-2,4-dioxo-1,2,3,4-tetrahydropyrimidin-5-yl)-1*H*-1,2,3-triazol-1-yl)acryloyl)piperazin-1-yl)ethane-1-sulfonate (**10g**) ( $\text{CD}_3\text{OD}$ )

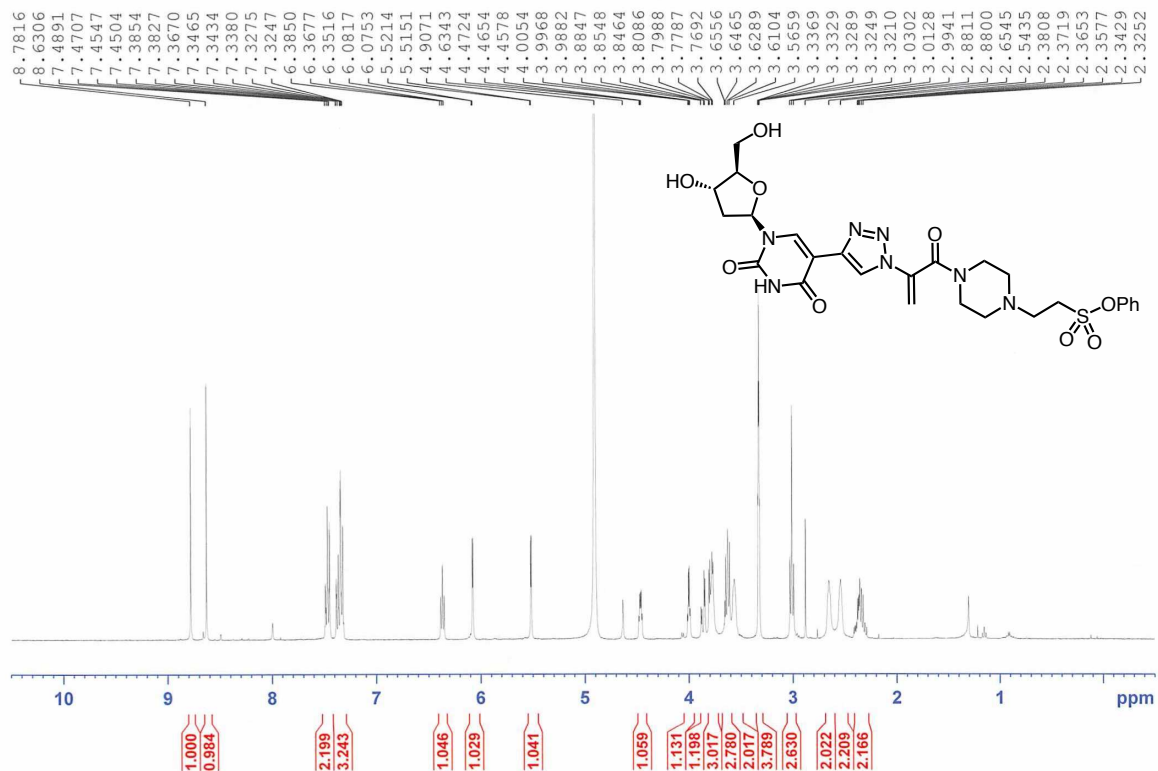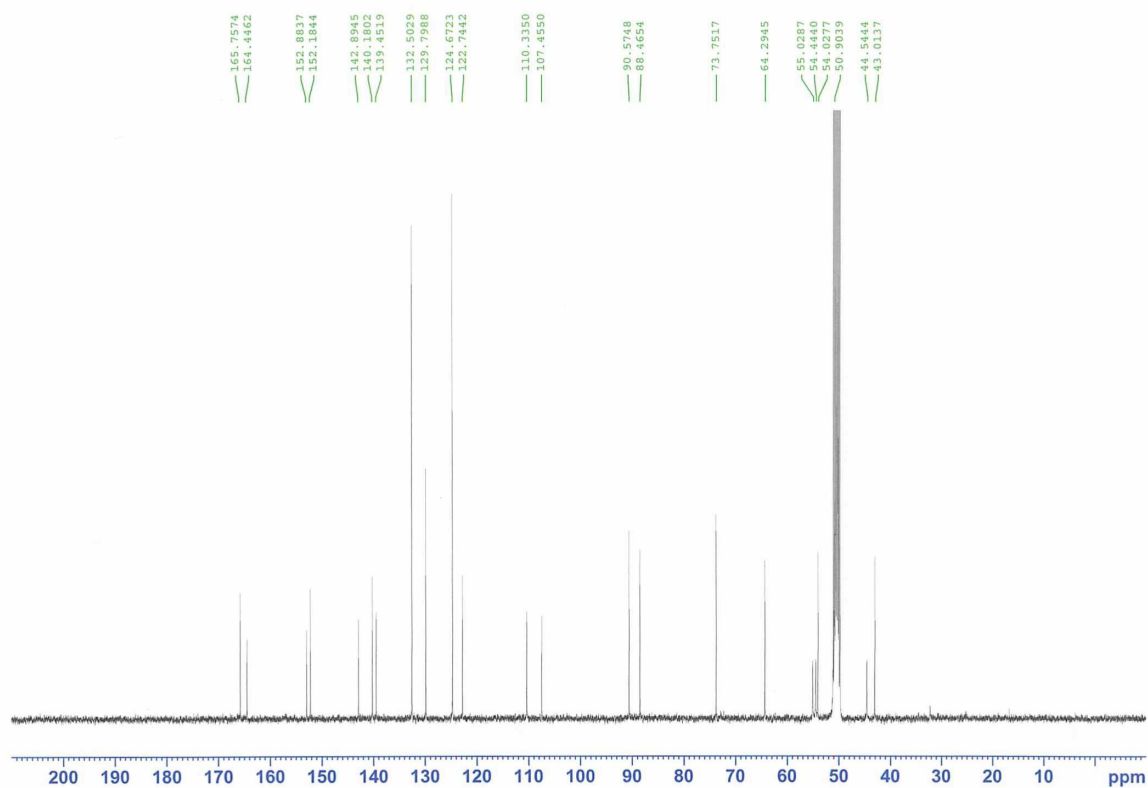

$^1\text{H}$  NMR (400 MHz) and  $^{13}\text{C}$  NMR (101 MHz) spectra of phenyl 2-(4-(2-(4-(((*tert*-butoxycarbonyl)(2-(2-((6-chlorohexyl)oxy)ethoxy)ethyl)amino)methyl)-1*H*-1,2,3-triazol-1-yl)acryloyl)piperazin-1-yl)ethane-1-sulfonate (**10h**) ( $\text{CDCl}_3$ )

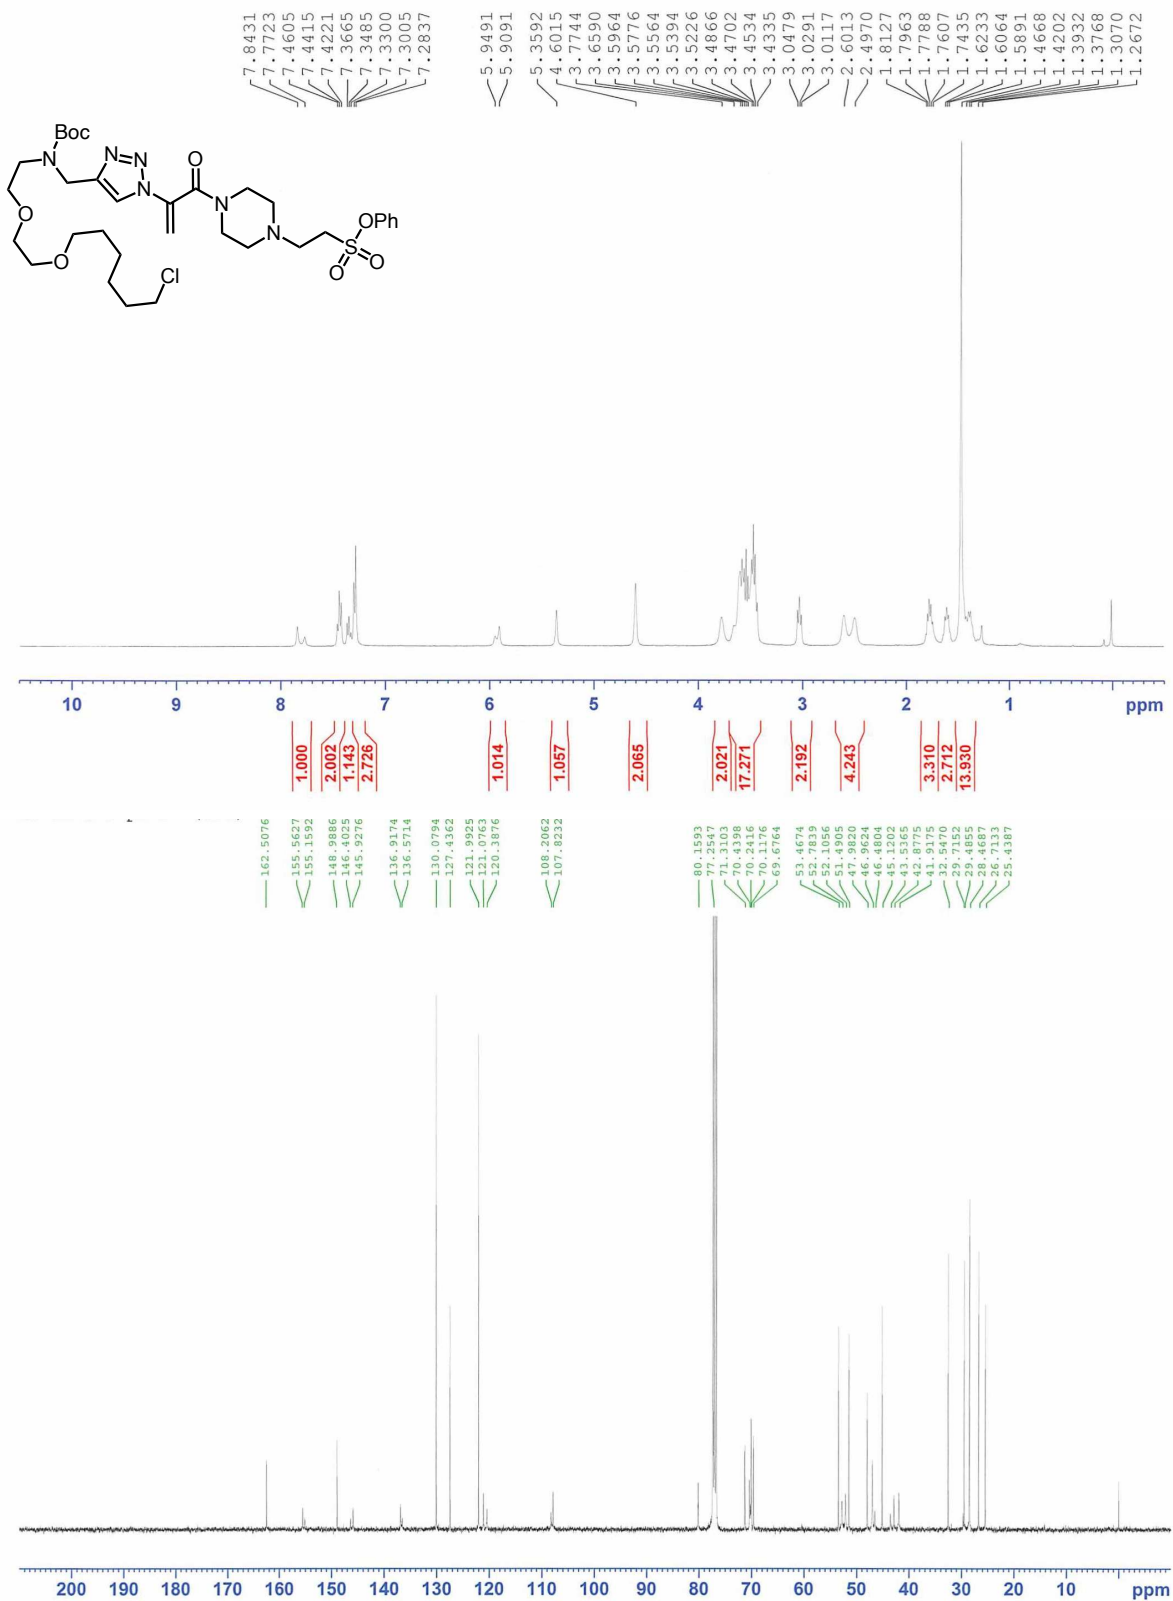



$^1\text{H}$  NMR (400 MHz) and  $^{13}\text{C}$  NMR (101 MHz) spectra of phenyl 2-(4-(2-(4-((5-((3aR,4R,6aS)-2-oxohexahydro-1H-thieno[3,4-d]imidazol-4-yl)pentanamido)methyl)-1H-1,2,3-triazol-1-yl)acryloyl)piperazin-1-yl)ethane-1-sulfonate (**10i**) ( $\text{CD}_3\text{OD}$ )

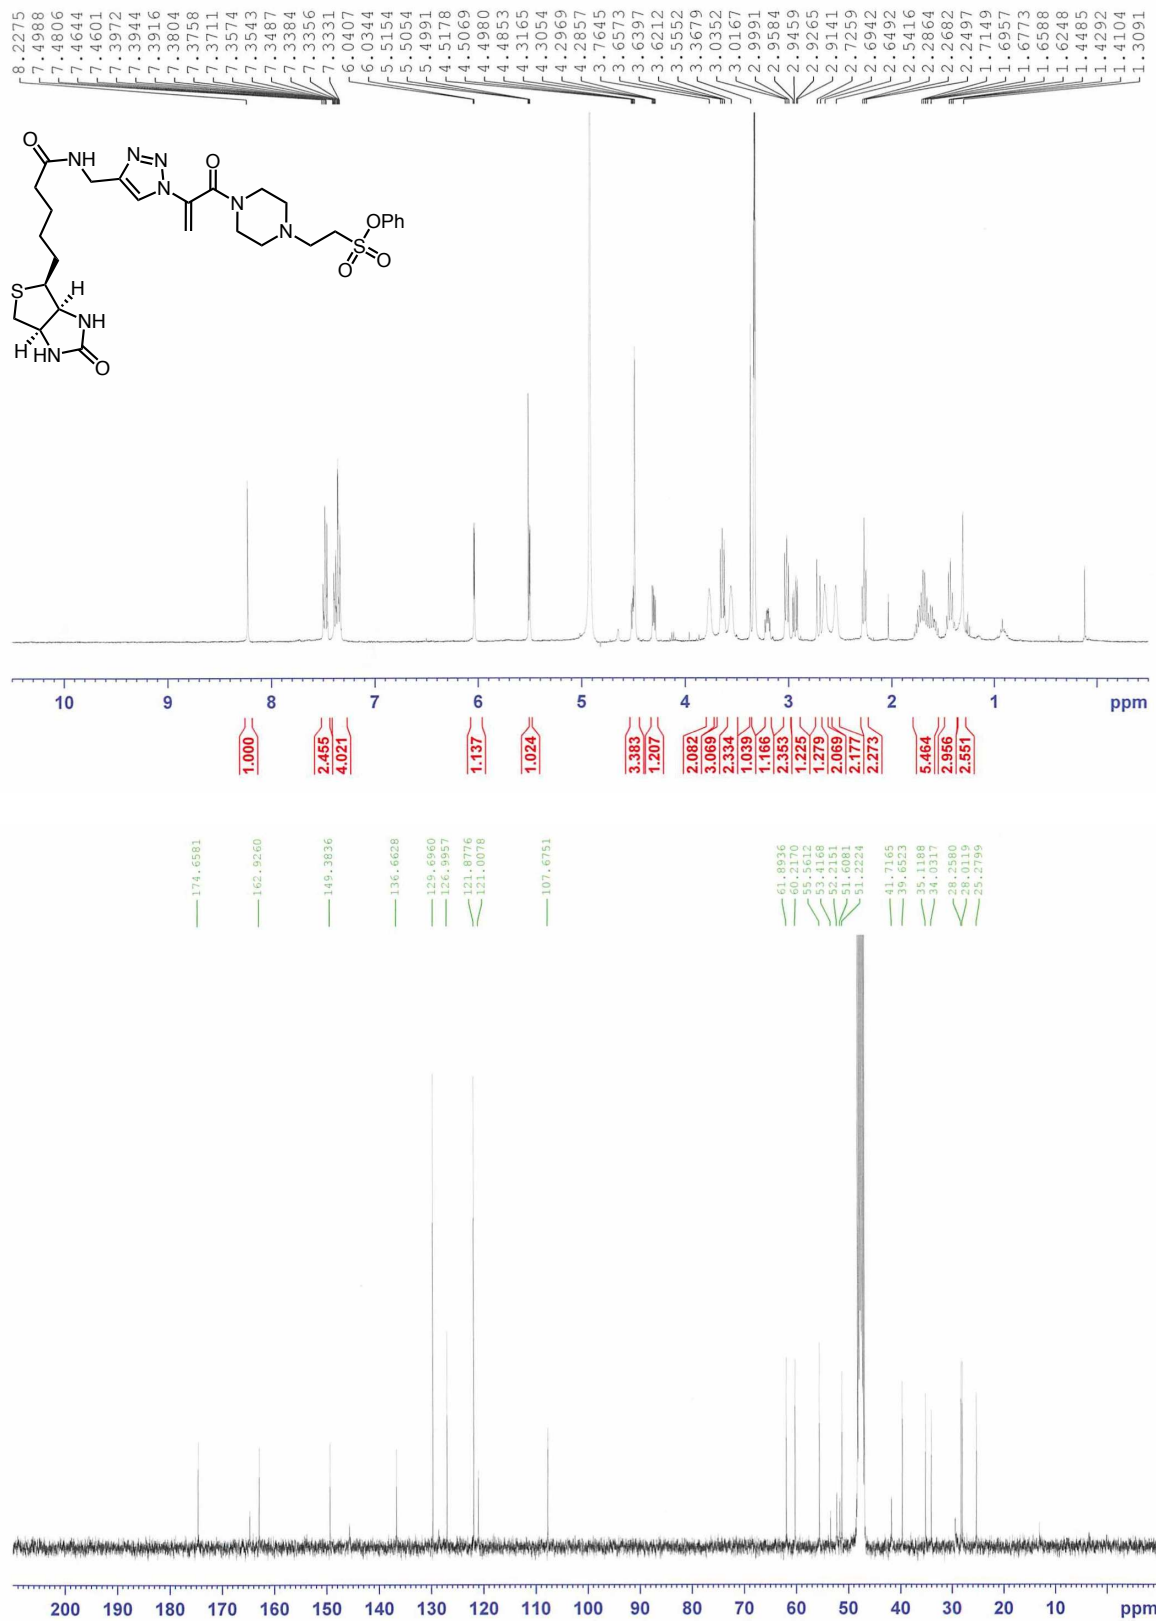

$^1\text{H}$  NMR (400 MHz) and  $^{13}\text{C}$  NMR (101 MHz) spectra of 2-(6-(diethylamino)-3-(diethyliminio)-3*H*-xanthen-9-yl)-5-(*N*-((1-(3-oxo-3-(4-(2-(phenoxy sulfonyl)ethyl)piperazin-1-yl)prop-1-en-2-yl)-1*H*-1,2,3-triazol-4-yl)methyl)sulfamoyl)benzenesulfonate (**10j**) (DMSO- $d_6$ )

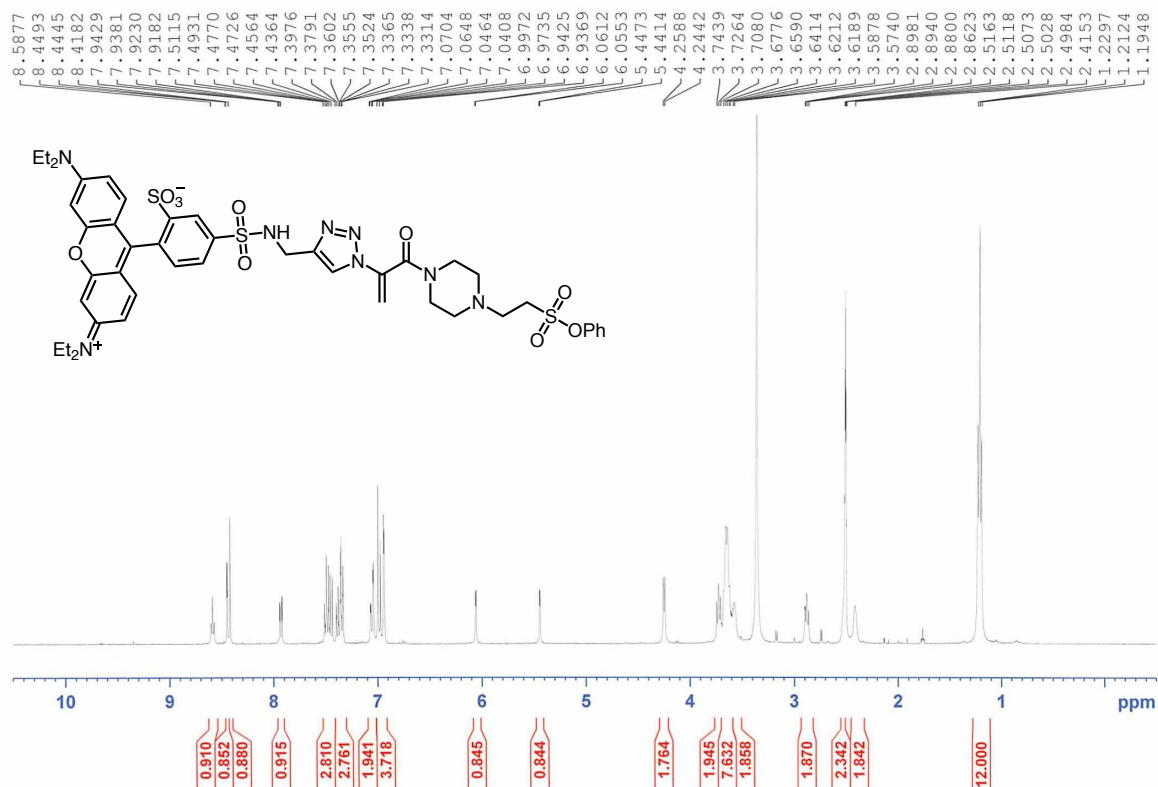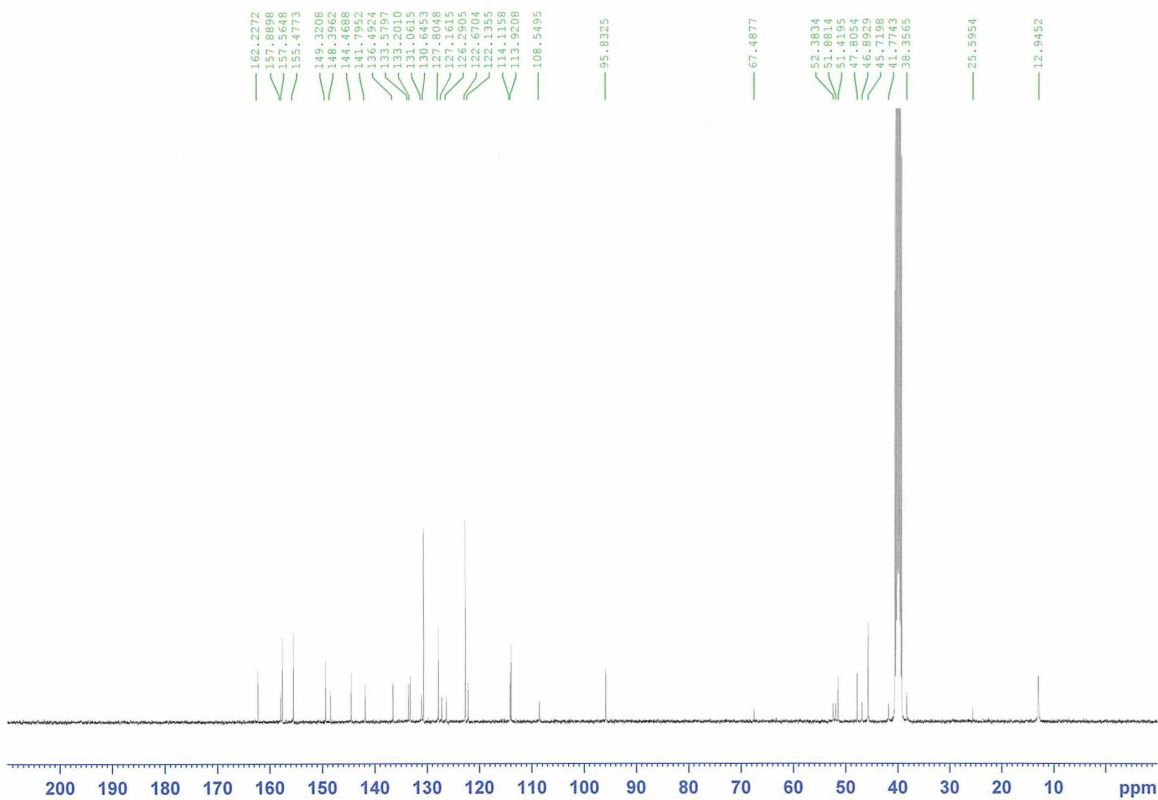

$^1\text{H}$  NMR (400 MHz) and  $^{13}\text{C}$  NMR (101 MHz) spectra of phenyl 2-(4-(2-((5a*R*,6*R*,6a*S*)-6-(hydroxymethyl)-5,5a,6,6a,7,8-hexahydrocyclopropa[5,6]cycloocta[1,2-*d*][1,2,3]triazol-1(4*H*)-yl)acryloyl)piperazin-1-yl)ethane-1-sulfonate (**10k**) ( $\text{CDCl}_3$ )

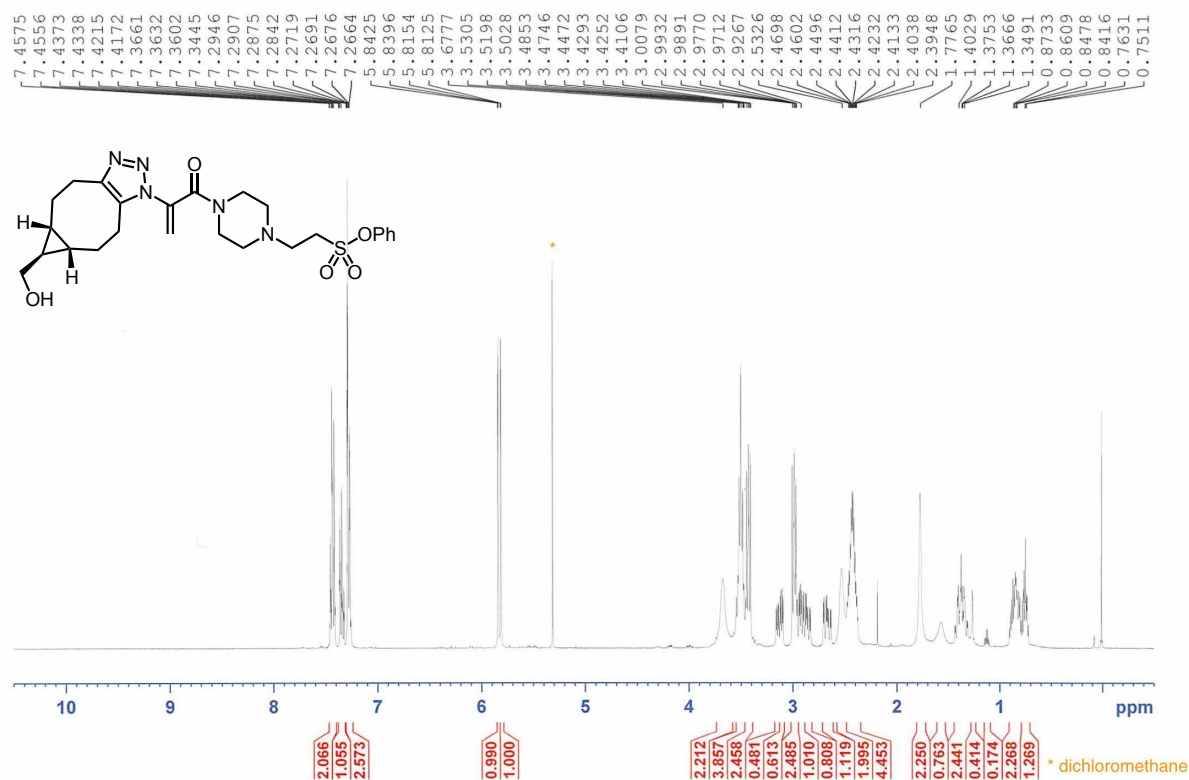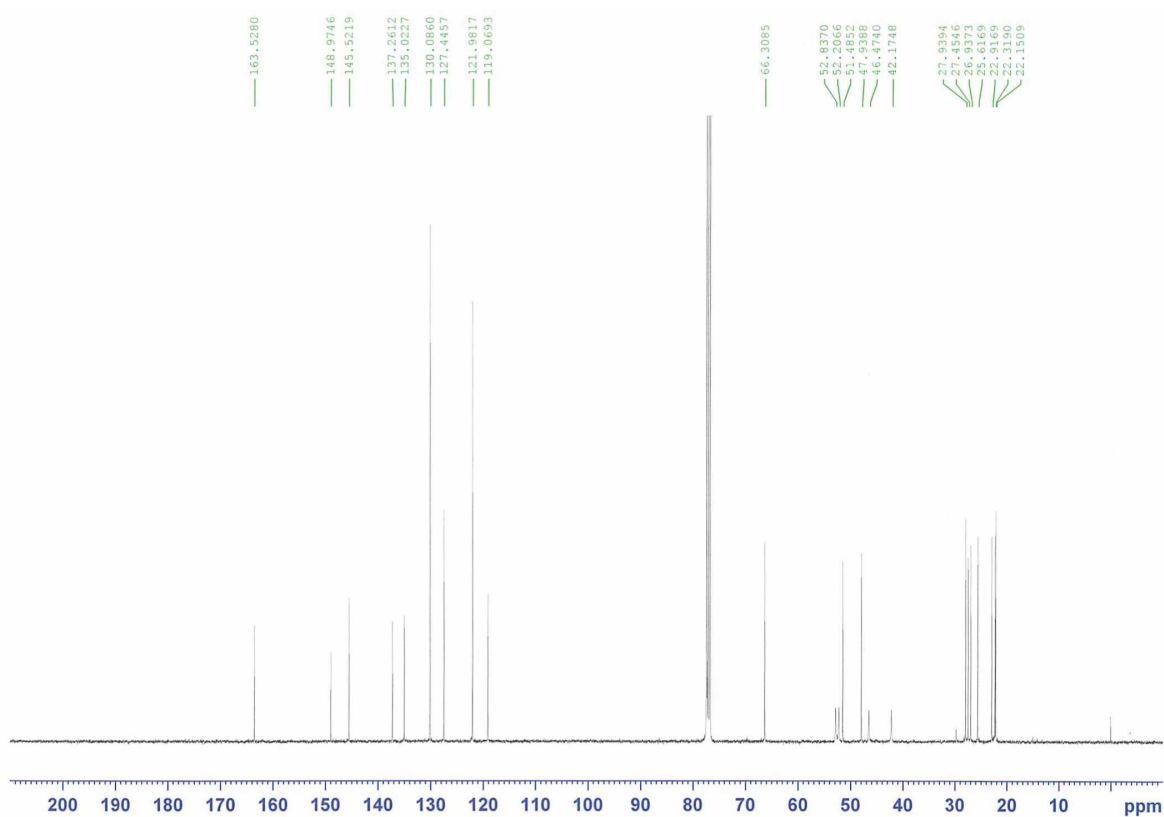

$^1\text{H}$  NMR (400 MHz) and  $^{13}\text{C}$  NMR (101 MHz) spectra of phenyl 2-(4-(3-((4-methoxyphenyl)thio)-2-(4-(*p*-tolyl)-1*H*-1,2,3-triazol-1-yl)propanoyl)piperazin-1-yl)ethane-1-sulfonate (**5b**) ( $\text{CDCl}_3$ )

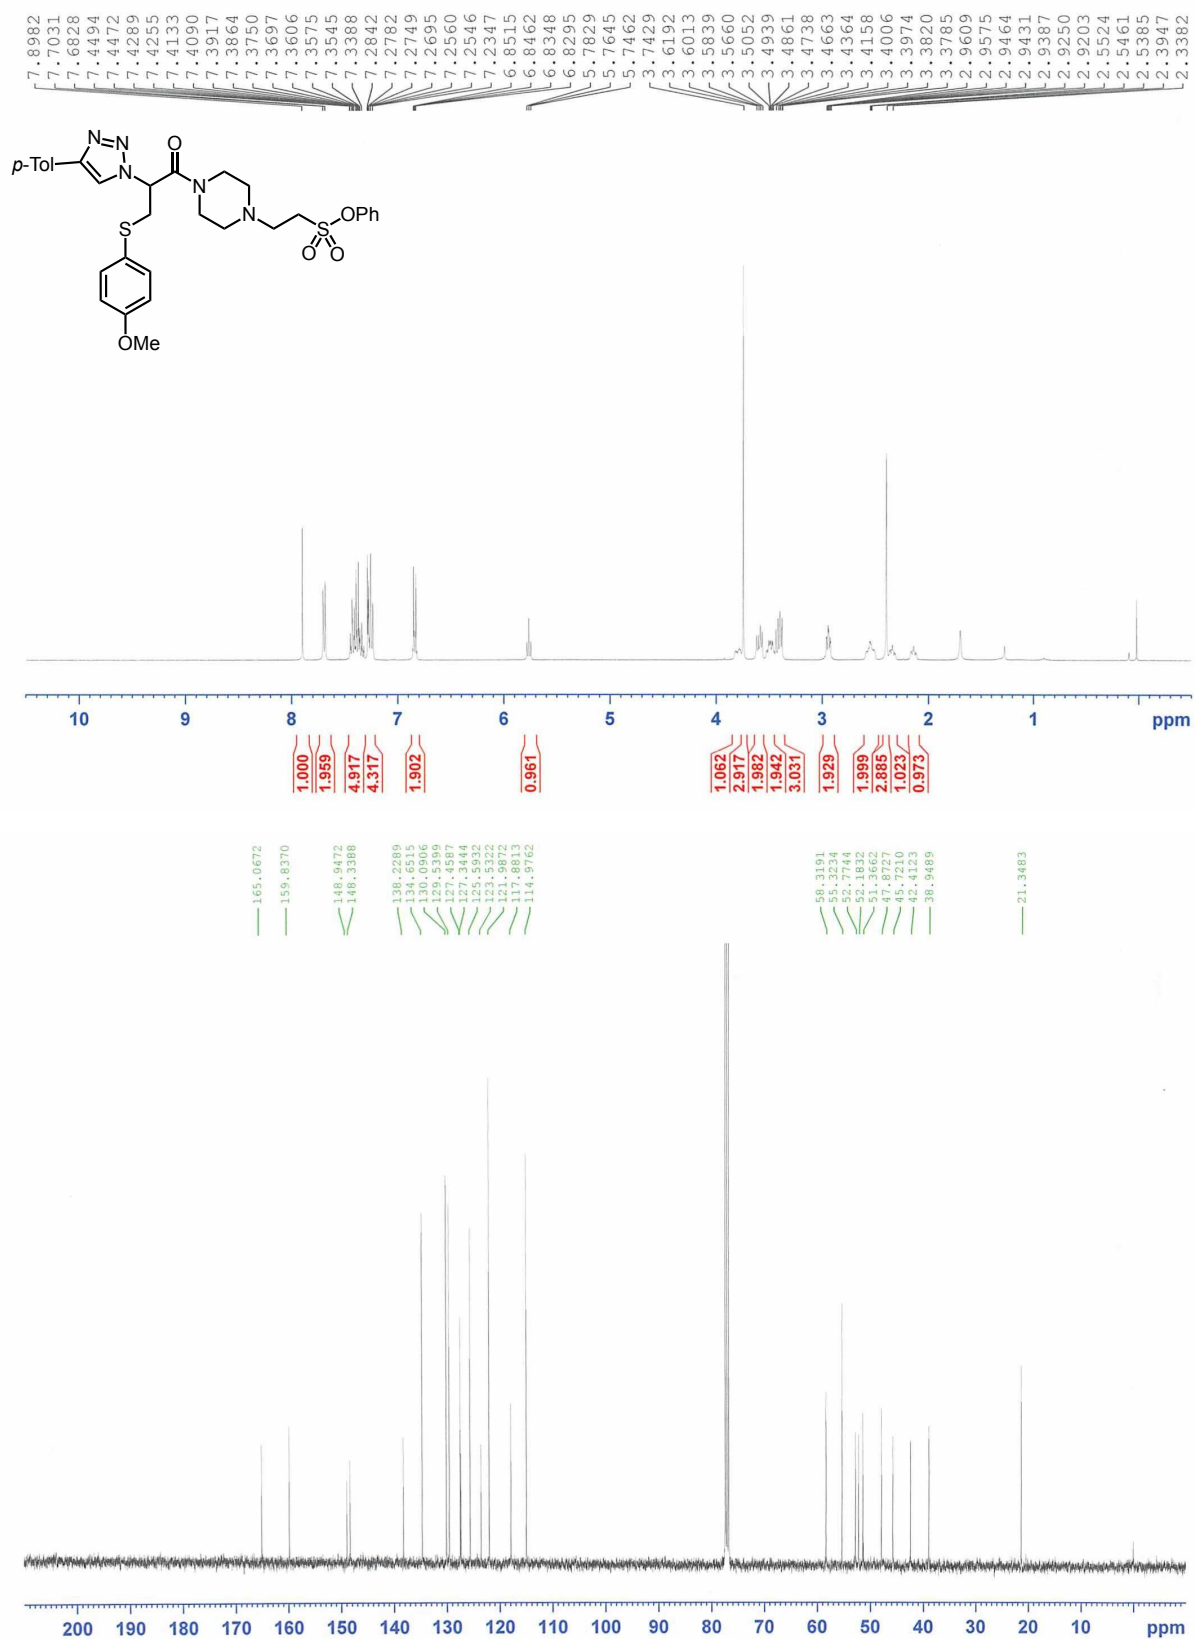

<sup>1</sup>H NMR (400 MHz) and <sup>13</sup>C NMR (101 MHz) spectra of methyl *N*-(*tert*-butoxycarbonyl)-*S*-(3-oxo-3-(4-(2-(*p*-tolyl)phenoxy)sulfonyl)ethyl)piperazin-1-yl)-2-(4-(*p*-tolyl)-1*H*-1,2,3-triazol-1-yl)propyl)-*L*-cysteinate (**5c**) (CDCl<sub>3</sub>)

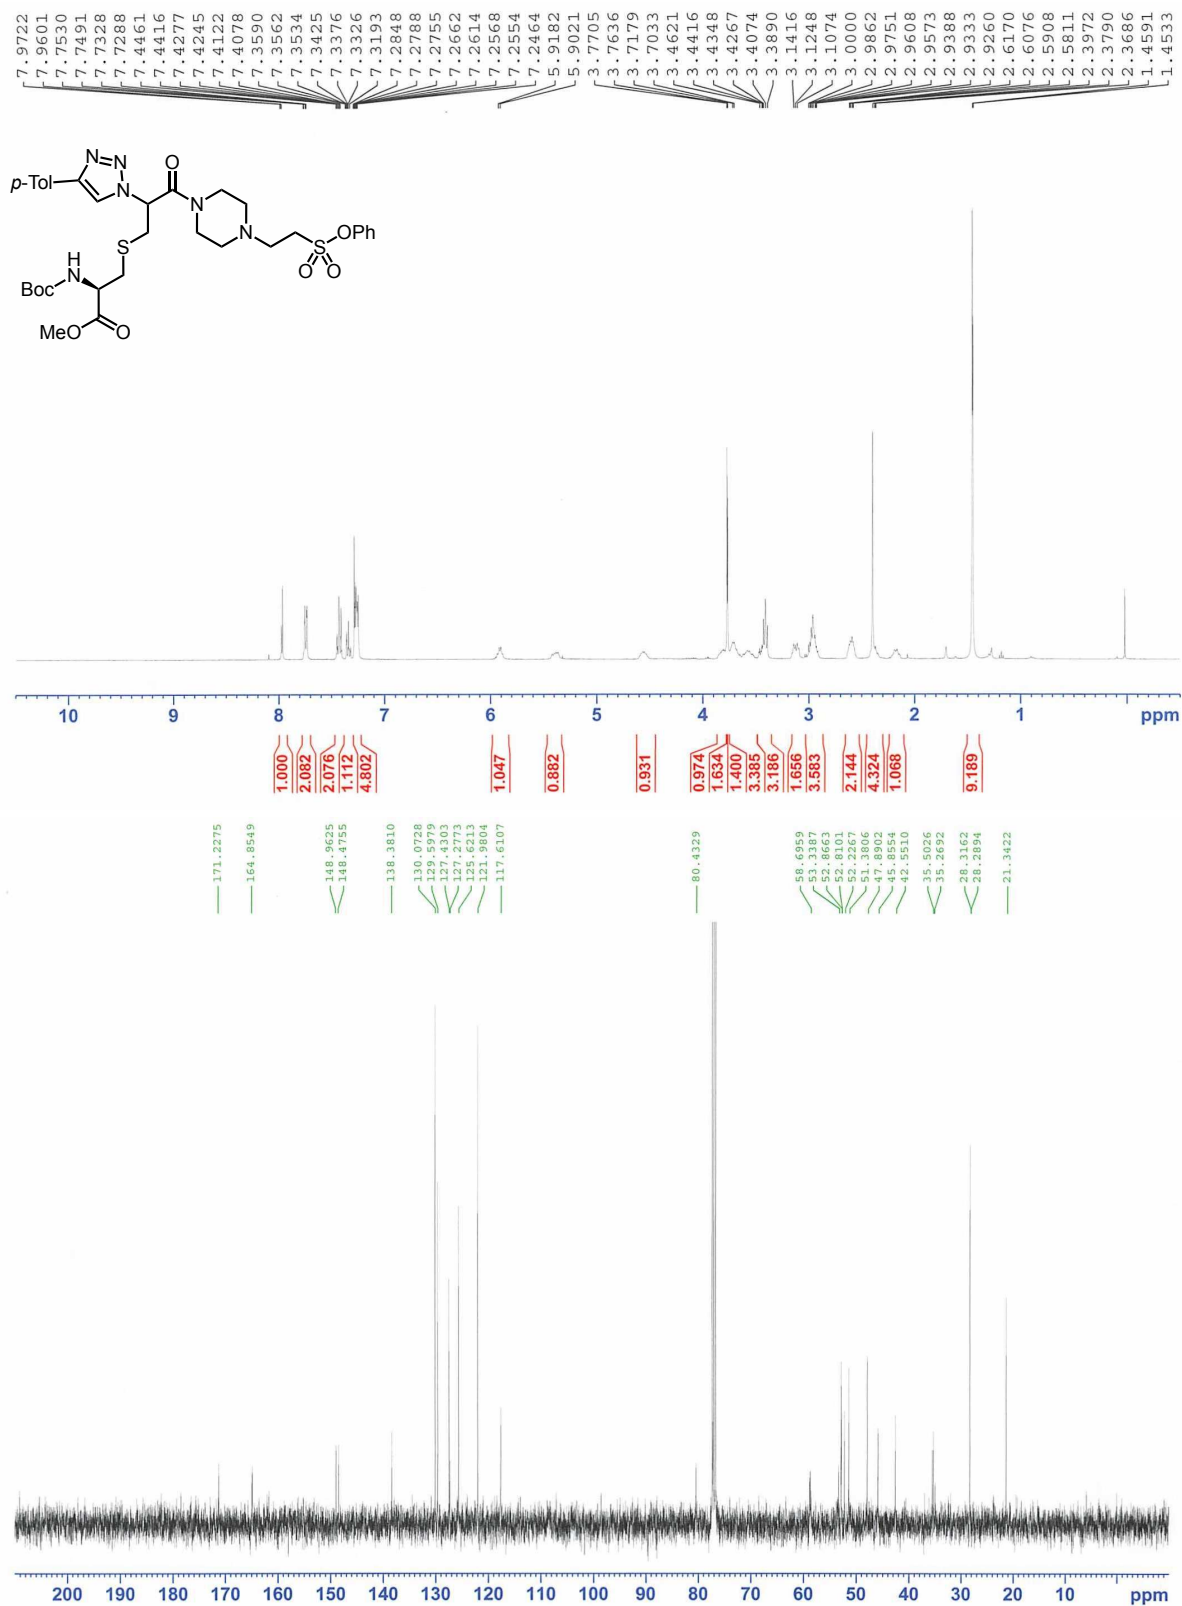

<sup>1</sup>H NMR (400 MHz) and <sup>13</sup>C NMR (101 MHz) spectra of phenyl 2-(4-(3-((2-((5-(dimethylamino)naphthalene)-1-sulfonamido)ethyl)thio)-2-(4-(*p*-tolyl)-1*H*-1,2,3-triazol-1-yl)propanoyl)piperazin-1-yl)ethane-1-sulfonate (**5d**) (CDCl<sub>3</sub>)

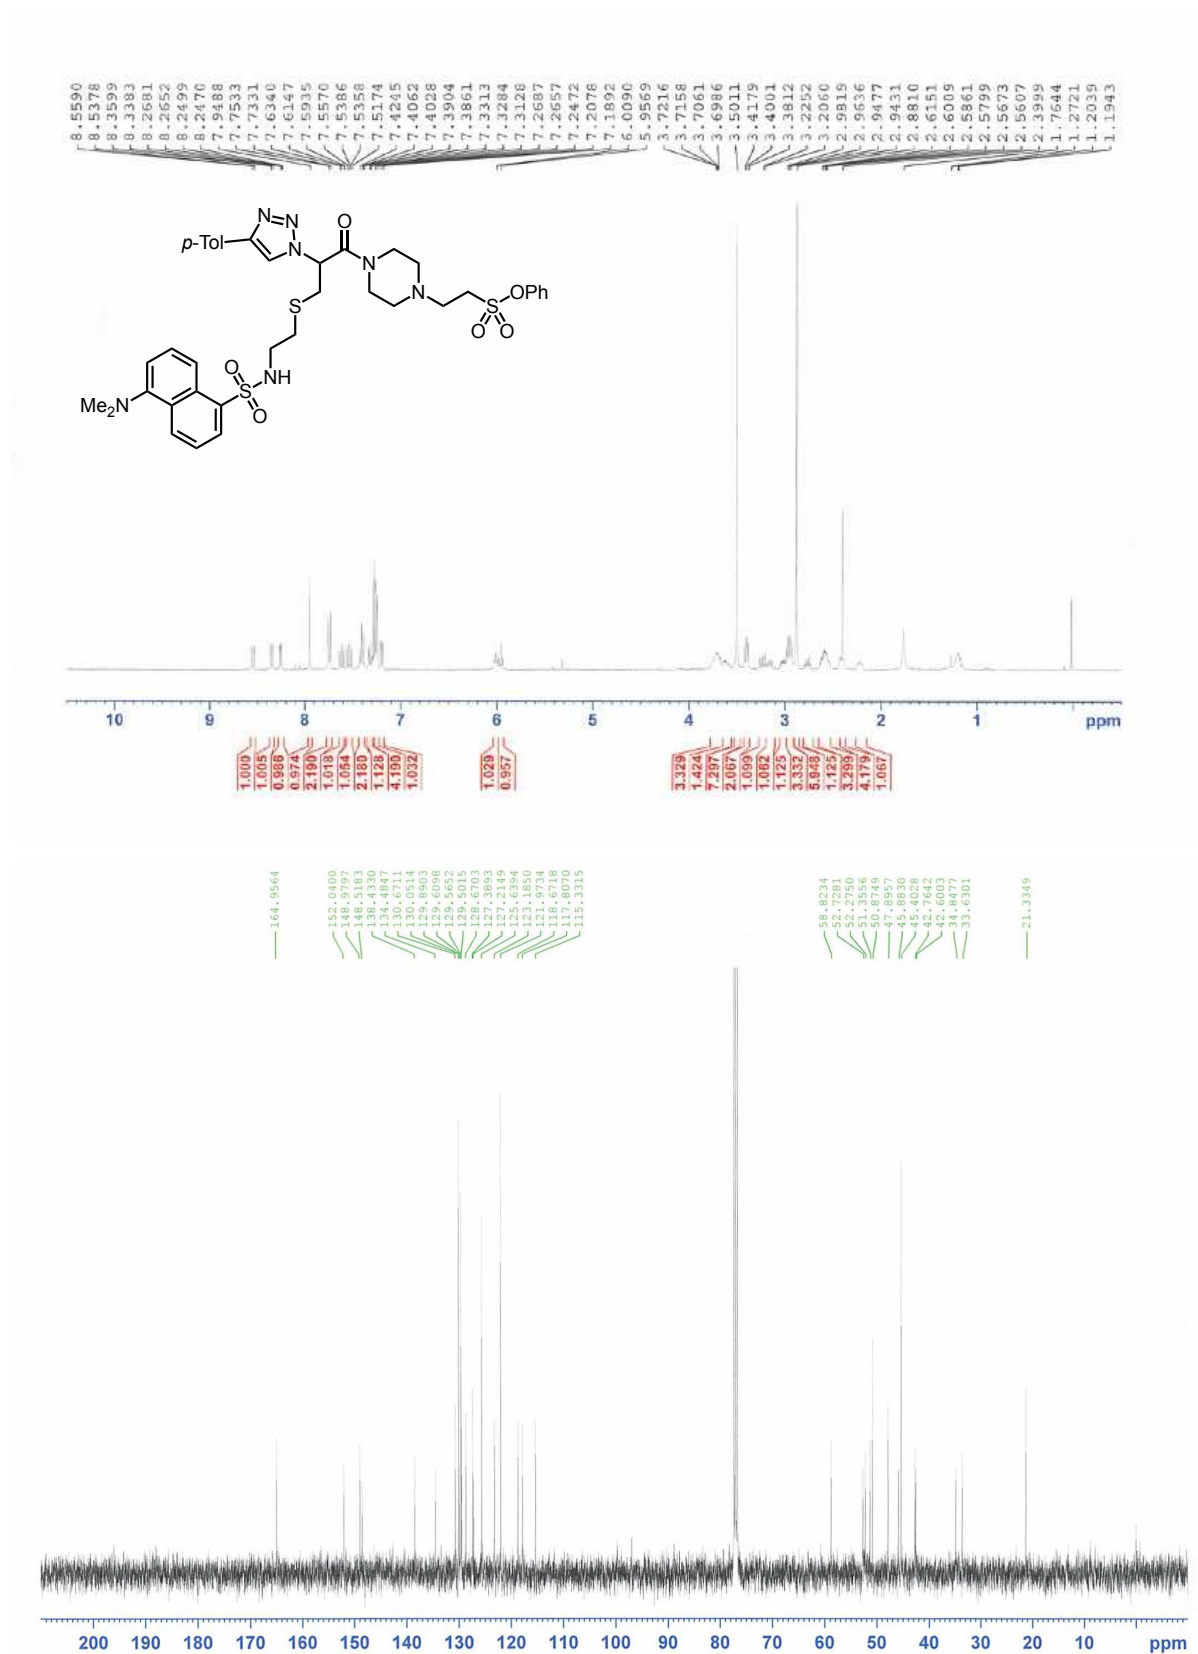

$^1\text{H}$  NMR (400 MHz) and  $^{13}\text{C}$  NMR (101 MHz) spectra of methyl *N*-(3-oxo-3-(4-(2-(phenoxysulfonyl)ethyl)piperazin-1-yl)-2-(4-(*p*-tolyl)-1*H*-1,2,3-triazol-1-yl)propyl)-L-lysinate (**5e**) ( $\text{CDCl}_3$ )

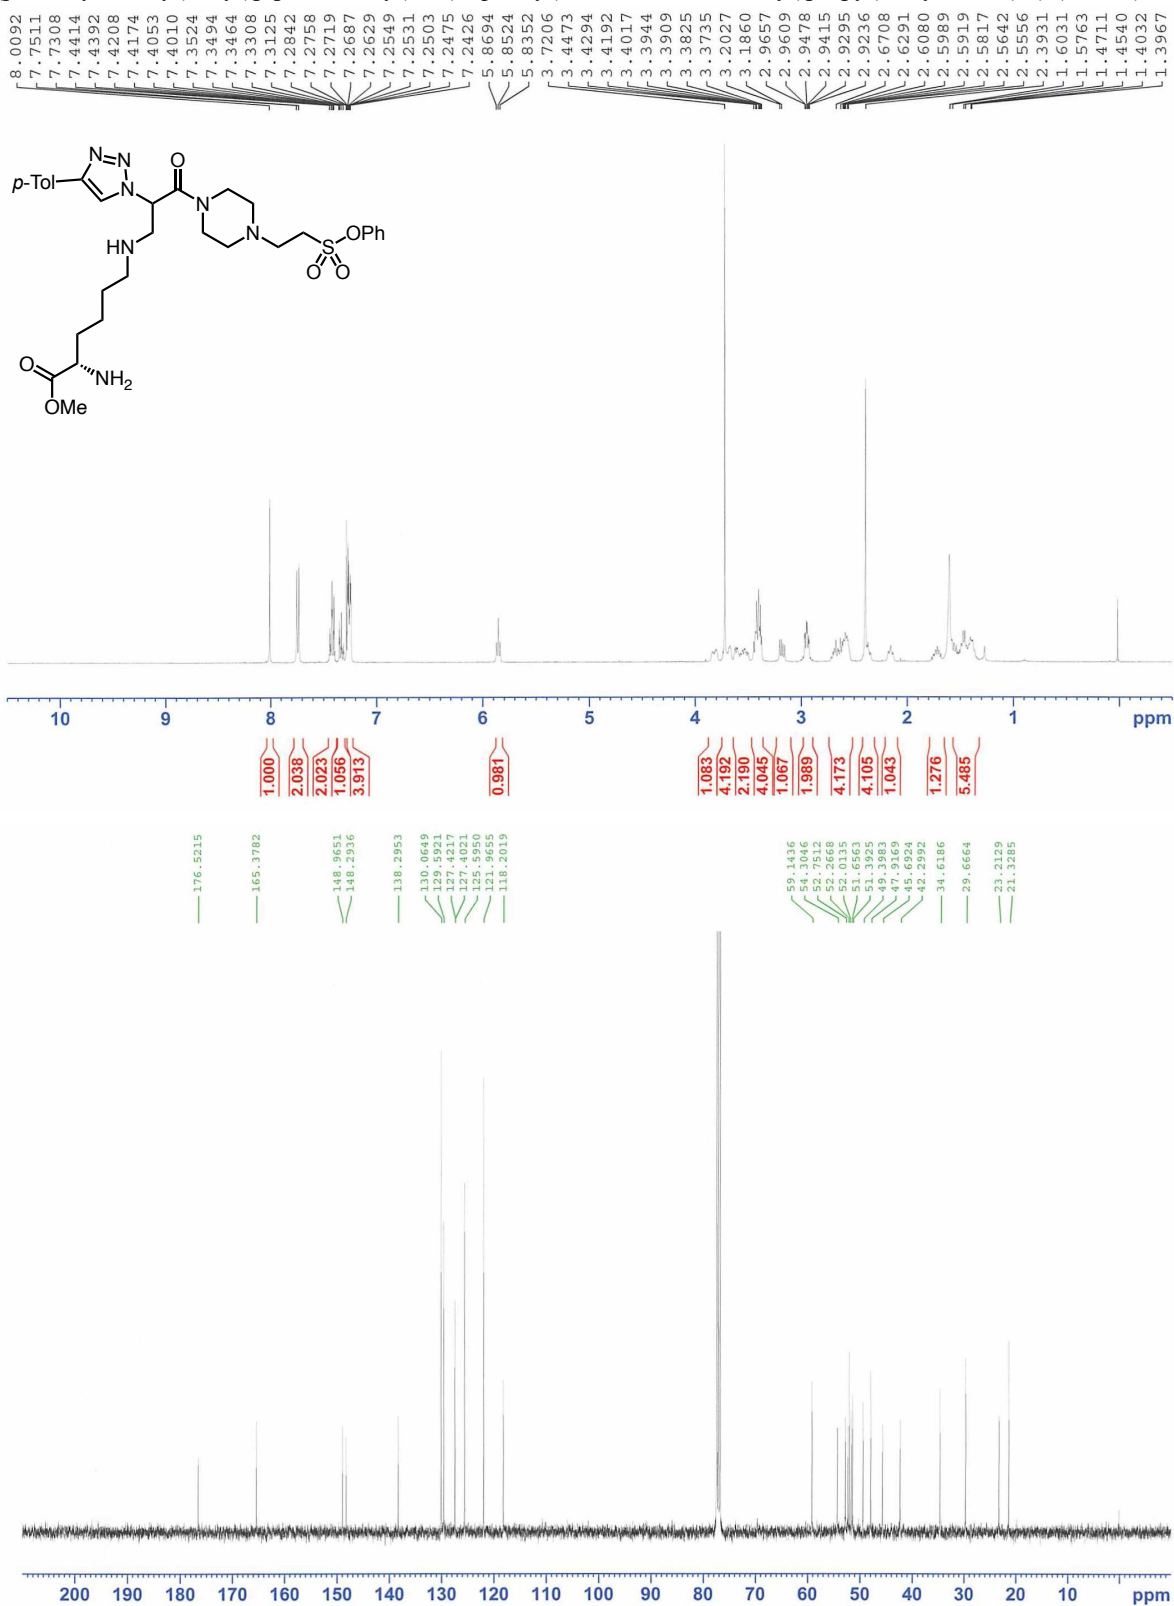

<sup>1</sup>H NMR (400 MHz) and <sup>13</sup>C NMR (101 MHz) spectra of phenyl 2-(4-(3-(6-amino-9H-purin-9-yl)-2-(4-(*p*-tolyl)-1H-1,2,3-triazol-1-yl)propanoyl)piperazin-1-yl)ethane-1-sulfonate (**5f**) (CDCl<sub>3</sub>)

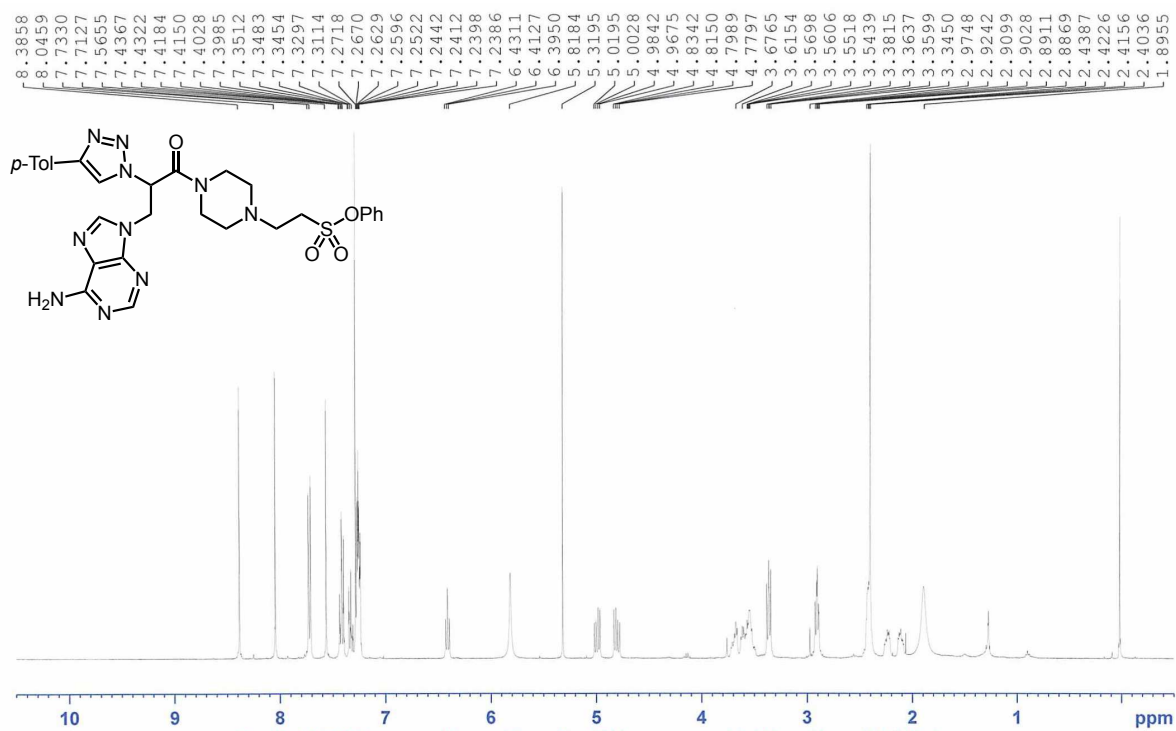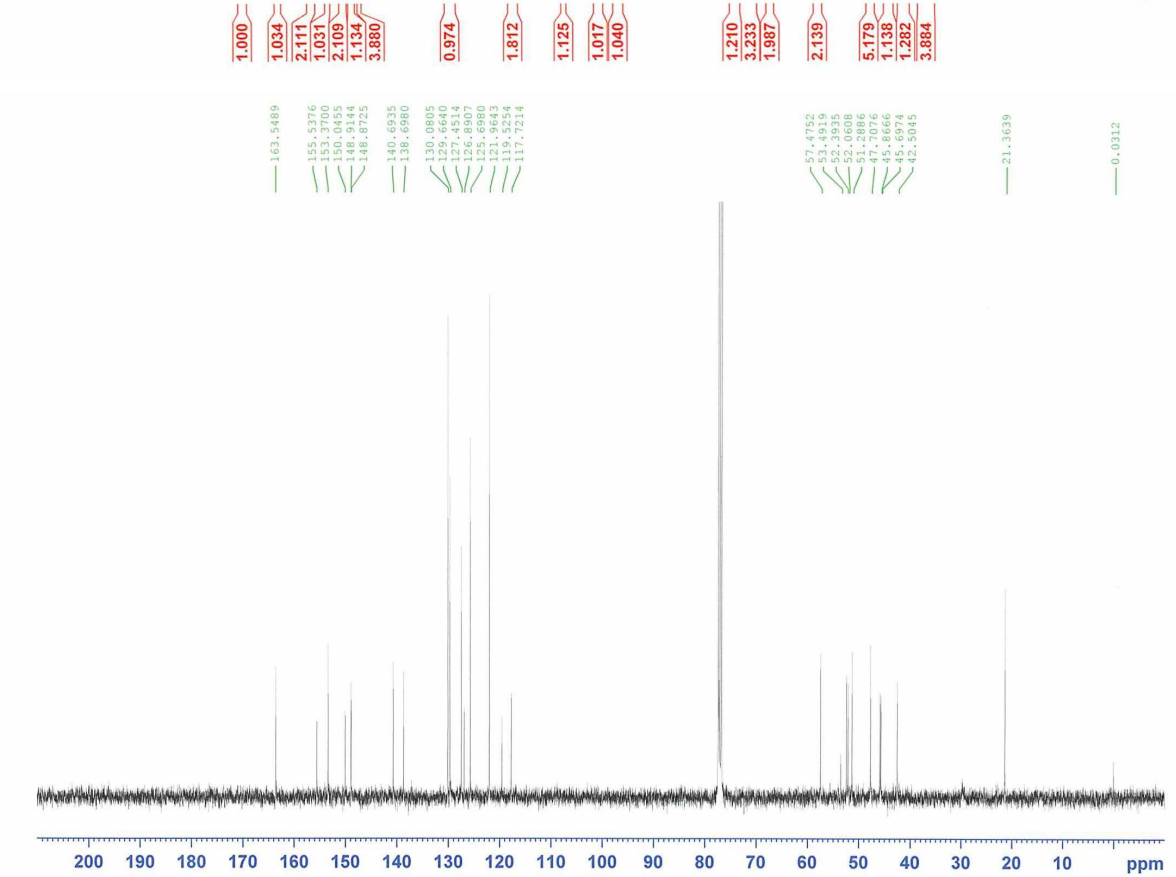



<sup>1</sup>H NMR (400 MHz) and <sup>13</sup>C NMR (101 MHz) spectra of phenyl 2-(4-(3-(6-amino-2-oxopyrazin-1(2H)-yl)-2-(4-(*p*-tolyl)-1H-1,2,3-triazol-1-yl)propanoyl)piperazin-1-yl)ethane-1-sulfonate (**5g**) (CDCl<sub>3</sub>)

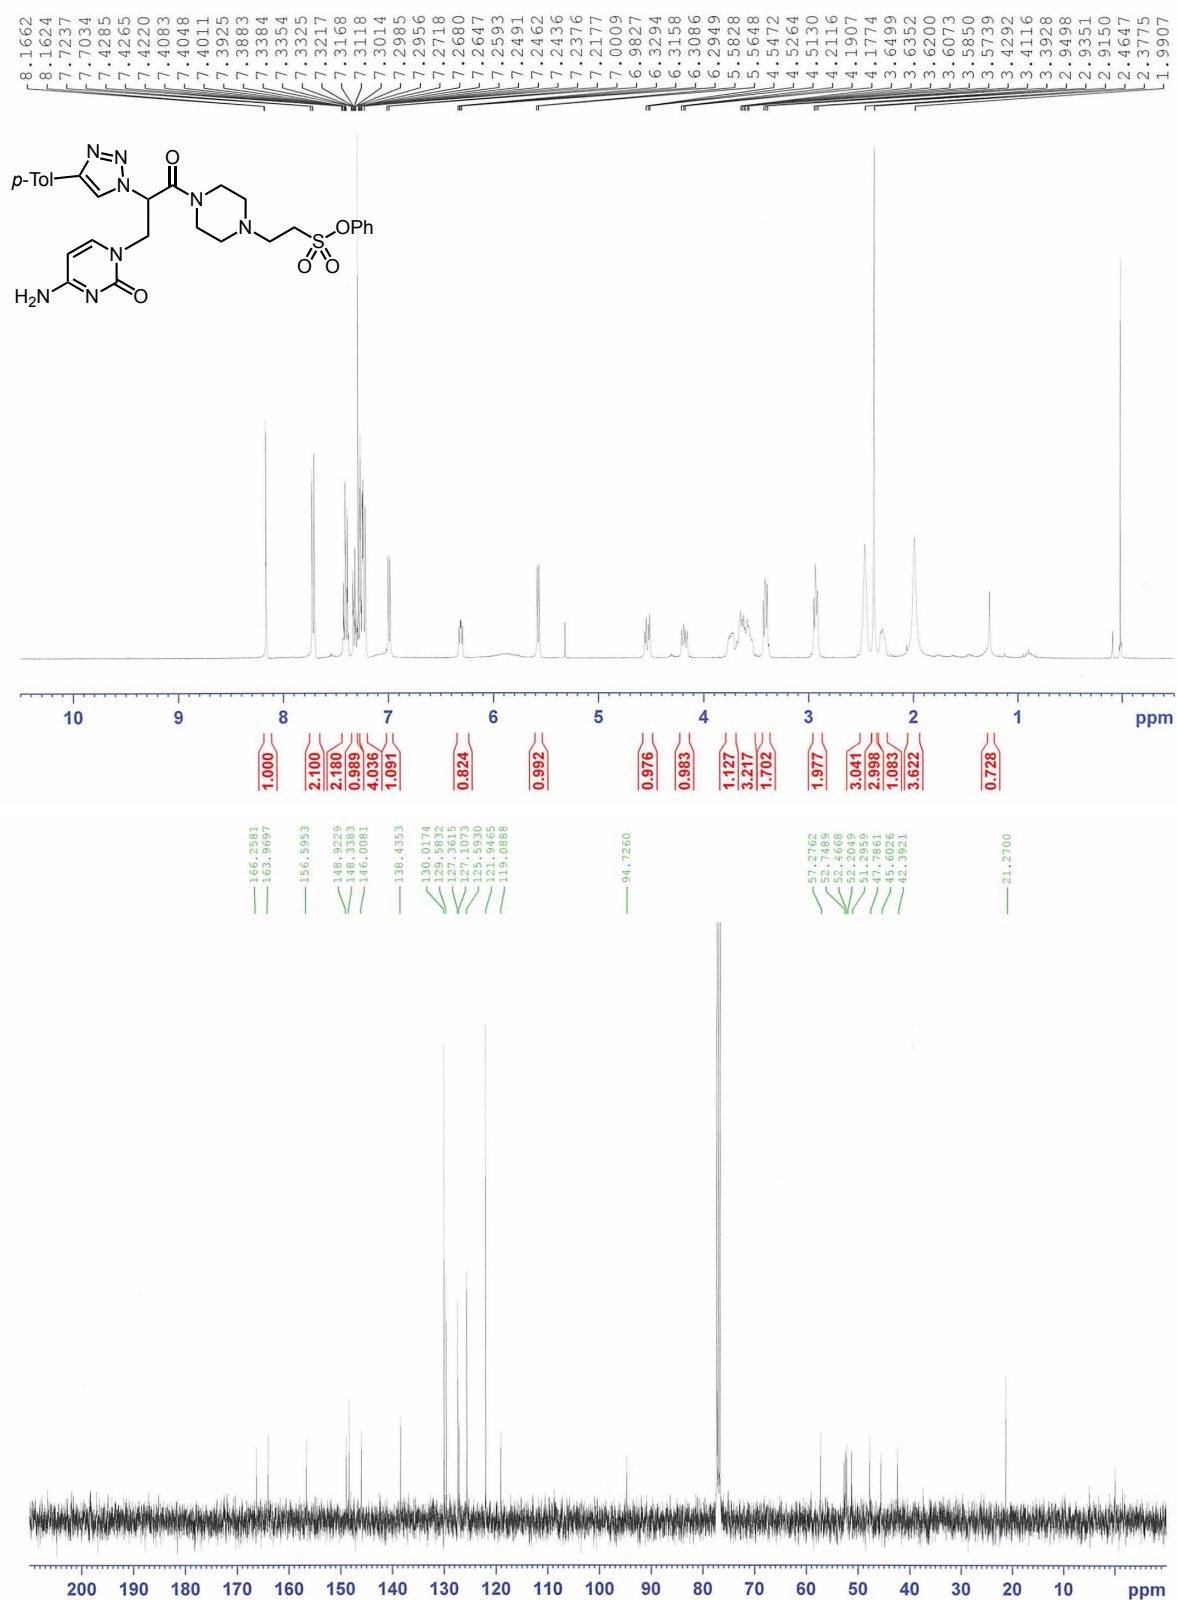

<sup>1</sup>H NMR (400 MHz) and <sup>13</sup>C NMR (101 MHz) spectra of phenyl 2-(4-(3-butoxy-2-(4-(*p*-tolyl)-1*H*-1,2,3-triazol-1-yl)propanoyl)piperazin-1-yl)ethane-1-sulfonate (**5h**) (CDCl<sub>3</sub>)

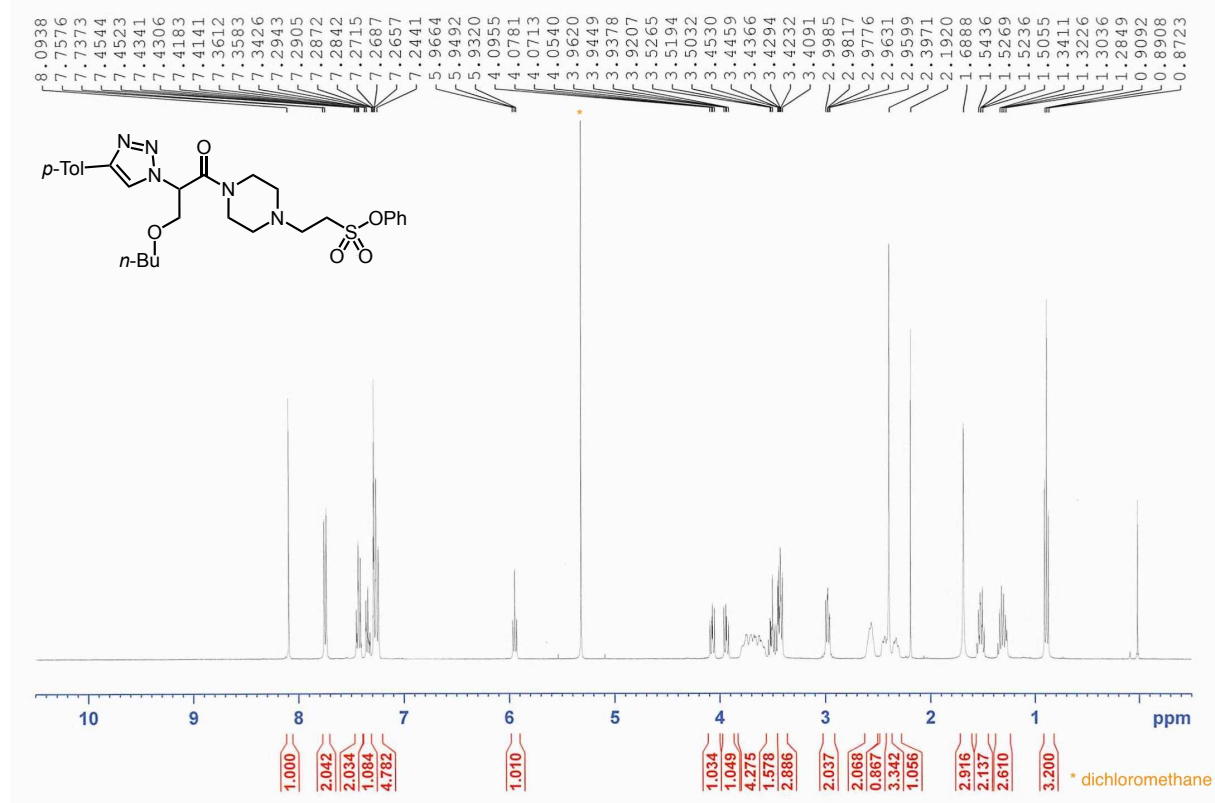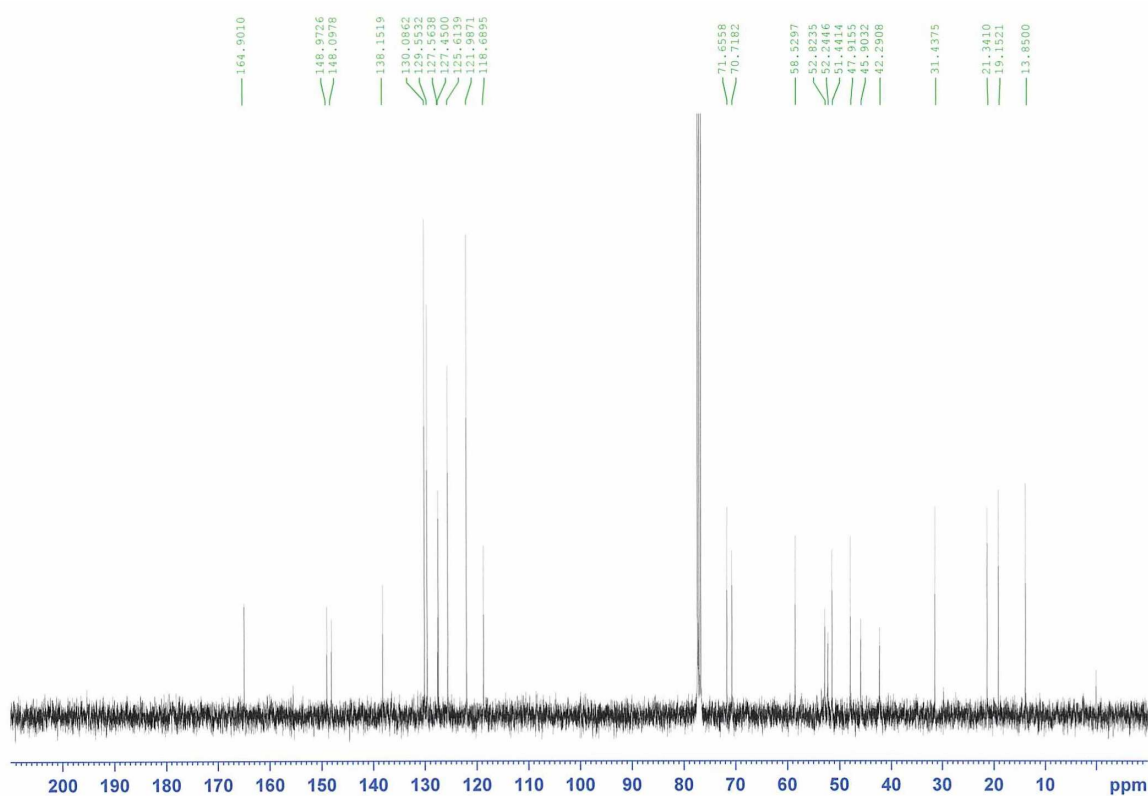

$^1\text{H}$  NMR (400 MHz) and  $^{13}\text{C}$  NMR (101 MHz) spectra of diethyl 2-(3-oxo-3-(4-(2-(phenoxysulfonyl)ethyl)piperazin-1-yl)-2-(4-(*p*-tolyl)-1*H*-1,2,3-triazol-1-yl)propyl)malonate (**5i**) ( $\text{CDCl}_3$ )

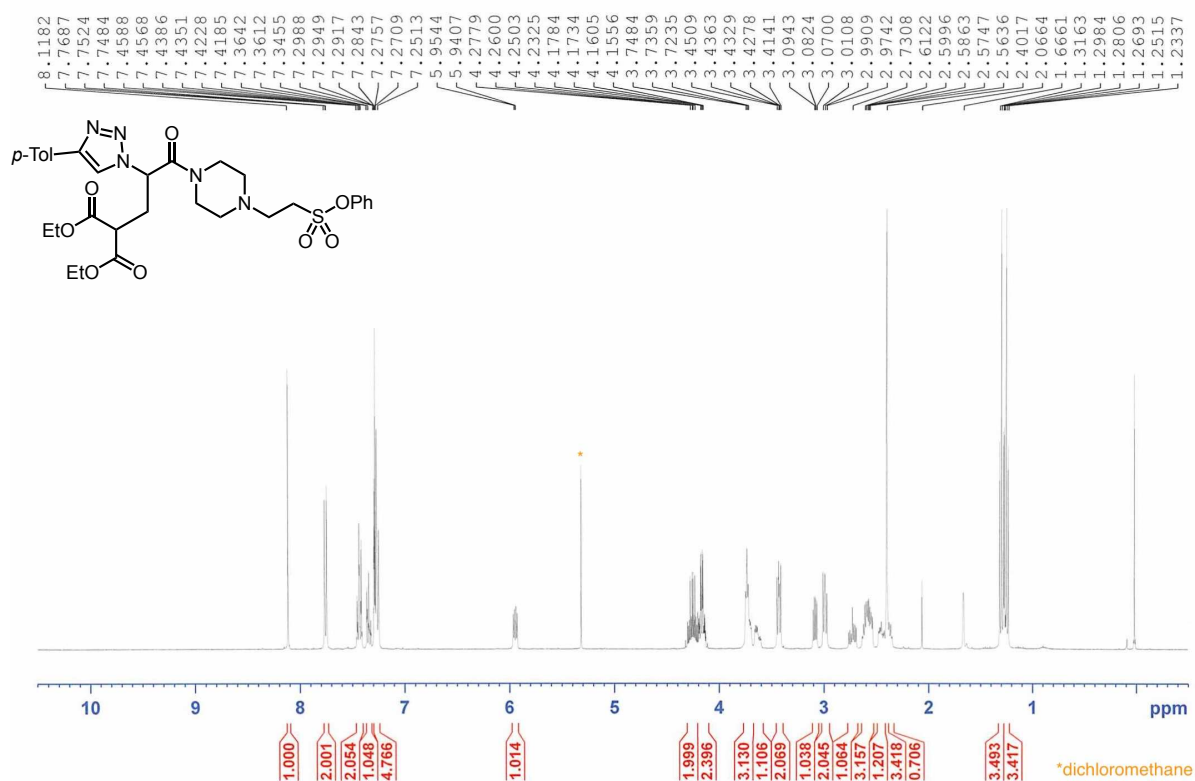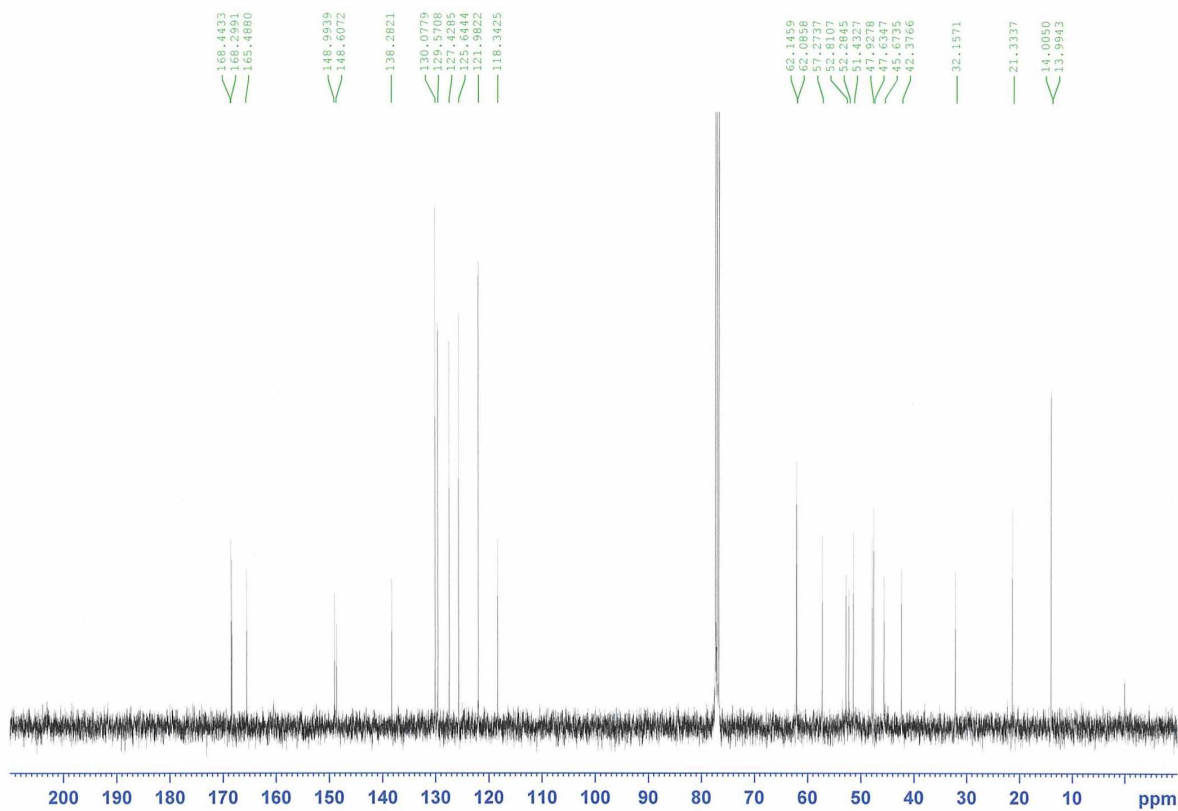

$^1\text{H}$  NMR (400 MHz) and  $^{13}\text{C}$  NMR (101 MHz) spectra of phenyl 2-(4-(2-(4-(4-(*tert*-butyldimethylsilyloxy)phenyl)-1*H*-1,2,3-triazol-1-yl)acryloyl)piperazin-1-yl)ethane-1-sulfonate (**13a**) ( $\text{CDCl}_3$ )

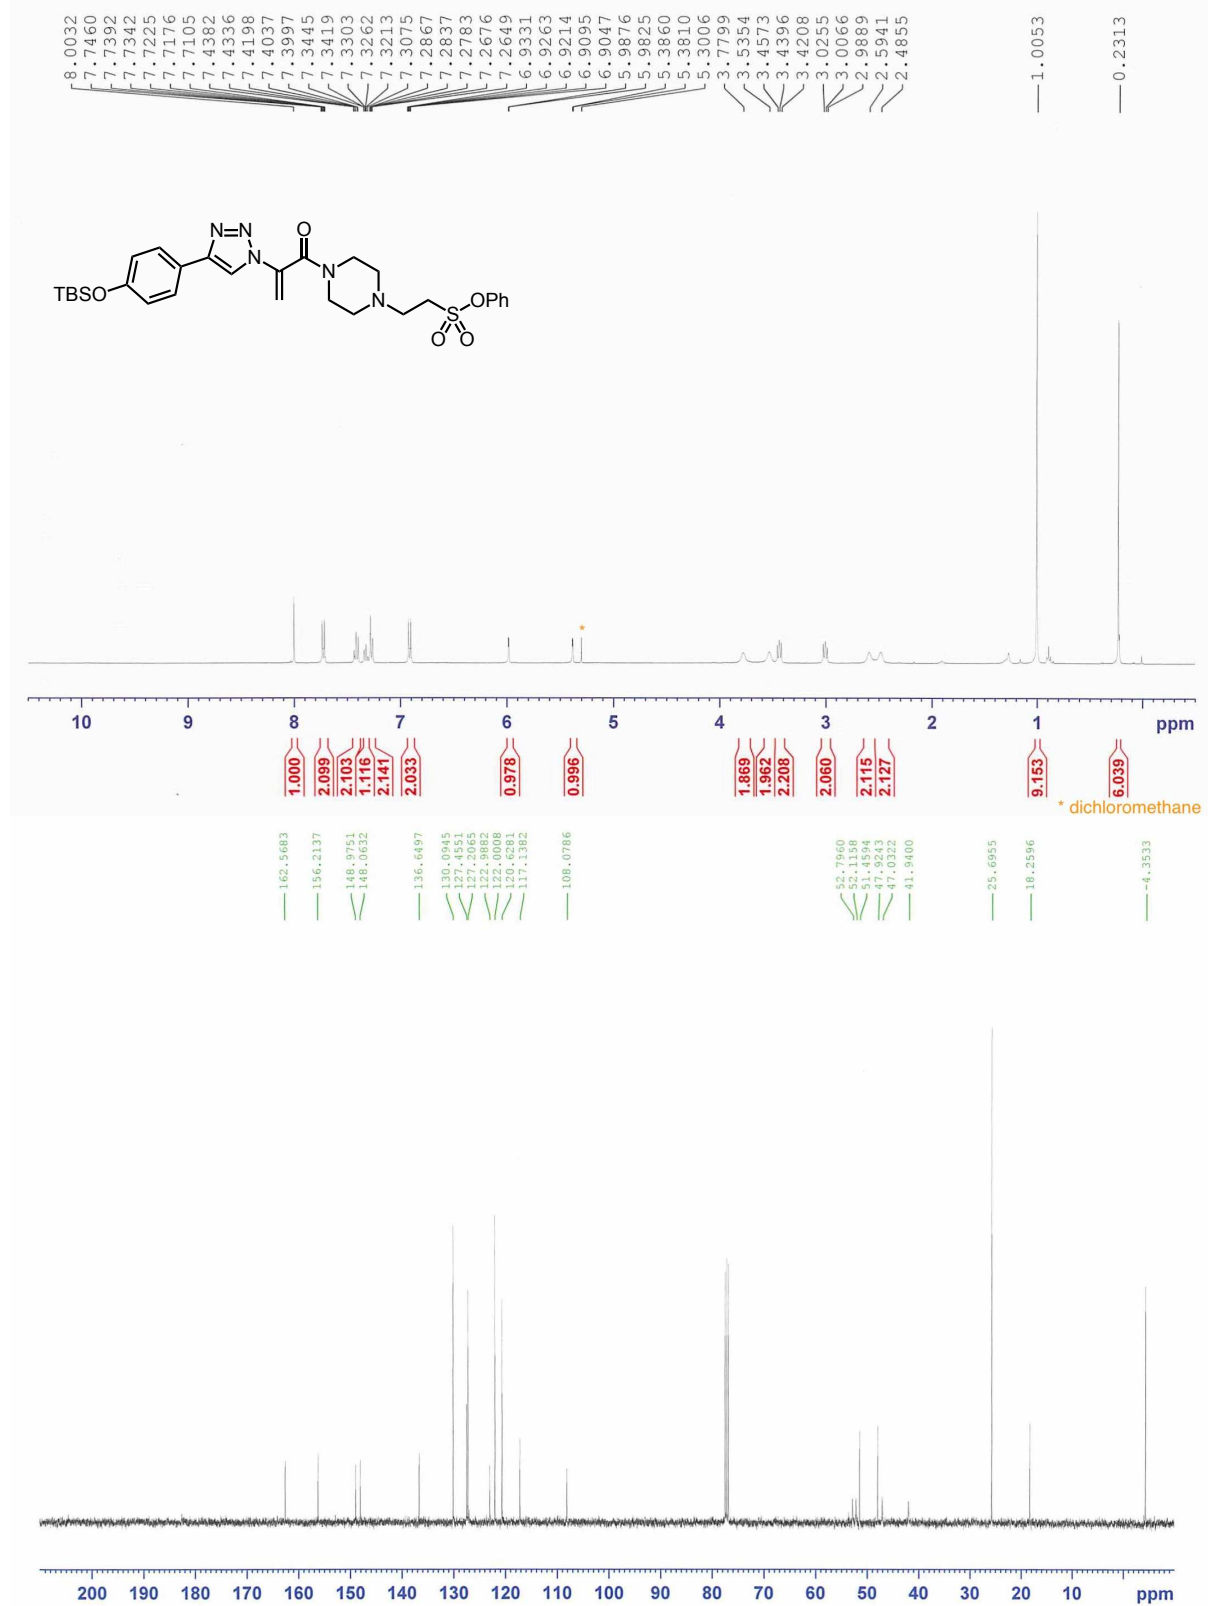

$^1\text{H}$  NMR (400 MHz) and  $^{13}\text{C}$  NMR (101 MHz) spectra of phenyl 2-(4-(2-(4-((2-(2-(4-hydroxybenzamido)ethoxy)ethoxy)methyl)-1H-1,2,3-triazol-1-yl)acryloyl)piperazin-1-yl)ethane-1-sulfonate (**13b**) ( $\text{CDCl}_3$ )

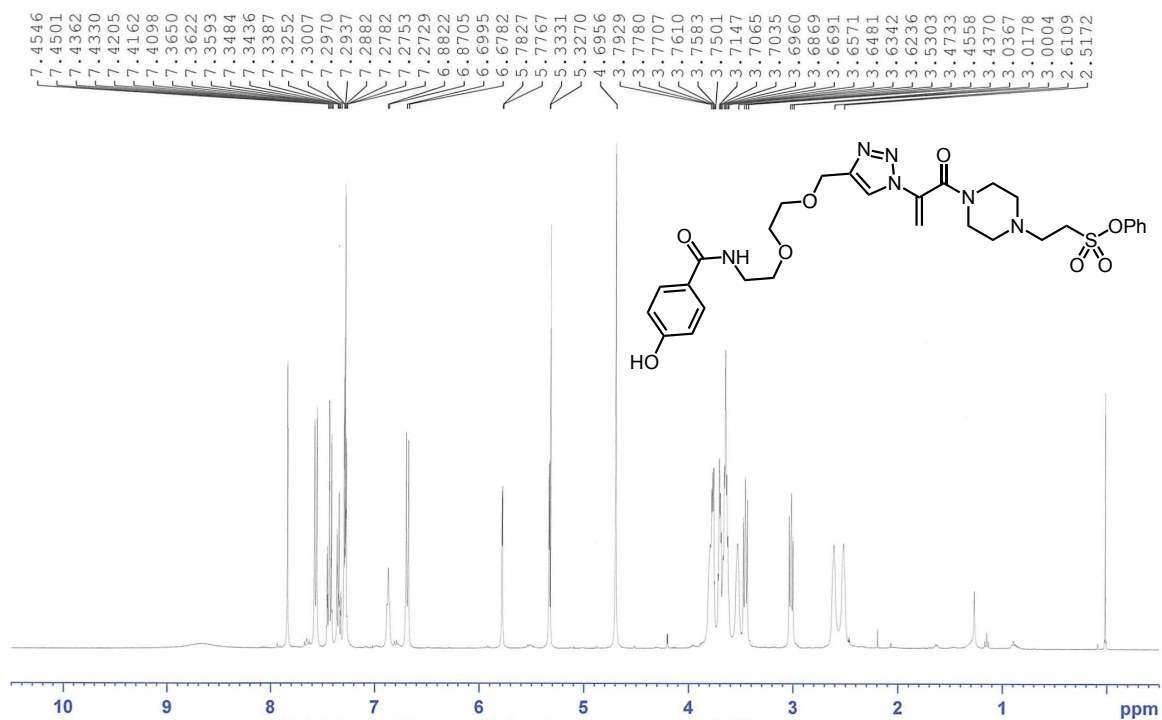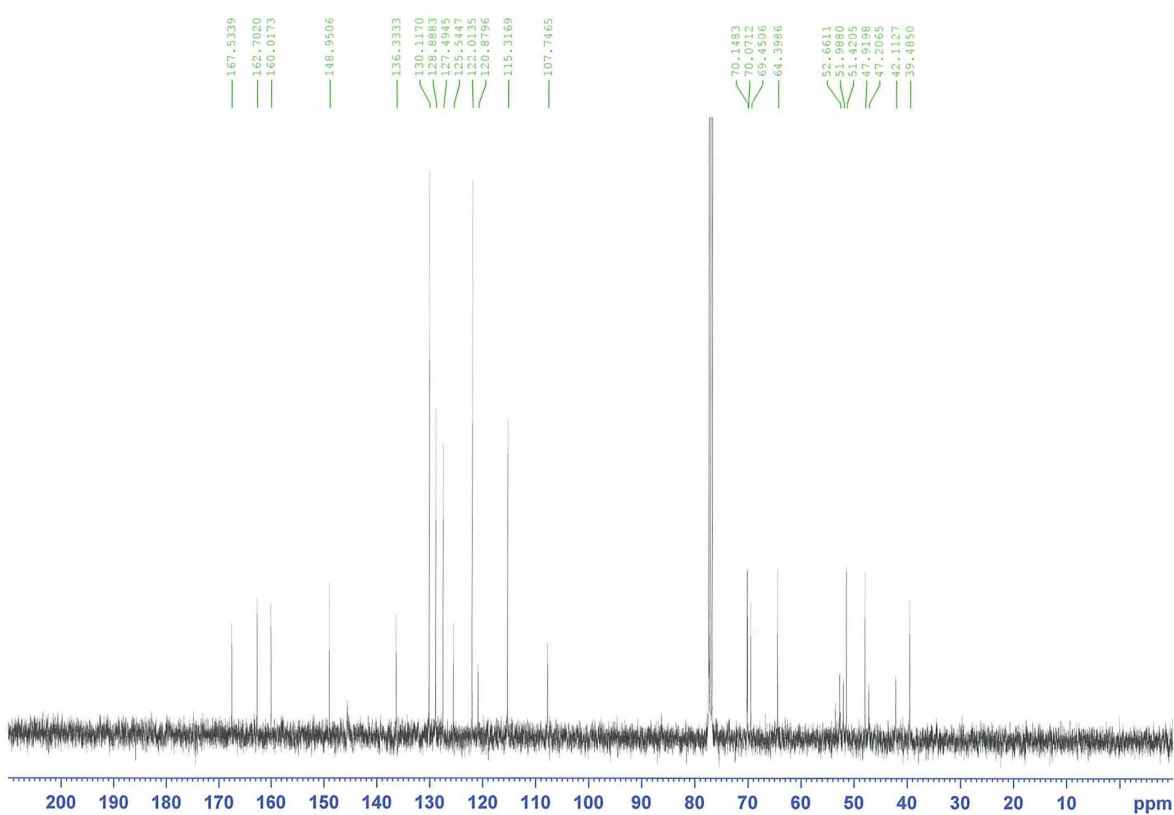

$^1\text{H}$  NMR (400 MHz) and  $^{13}\text{C}$  NMR (101 MHz) spectra of phenyl 2-(4-(2-(4-((8*S*,9*R*,13*R*,14*R*,17*S*)-3,17-dihydroxy-13-methyl-7,8,9,11,12,13,14,15,16,17-decahydro-6*H*-cyclopenta[*a*]phenanthren-17-yl)-1*H*-1,2,3-triazol-1-yl)acryloyl)piperazin-1-yl)ethane-1-sulfonate (**13c**) ( $\text{CDCl}_3$ )

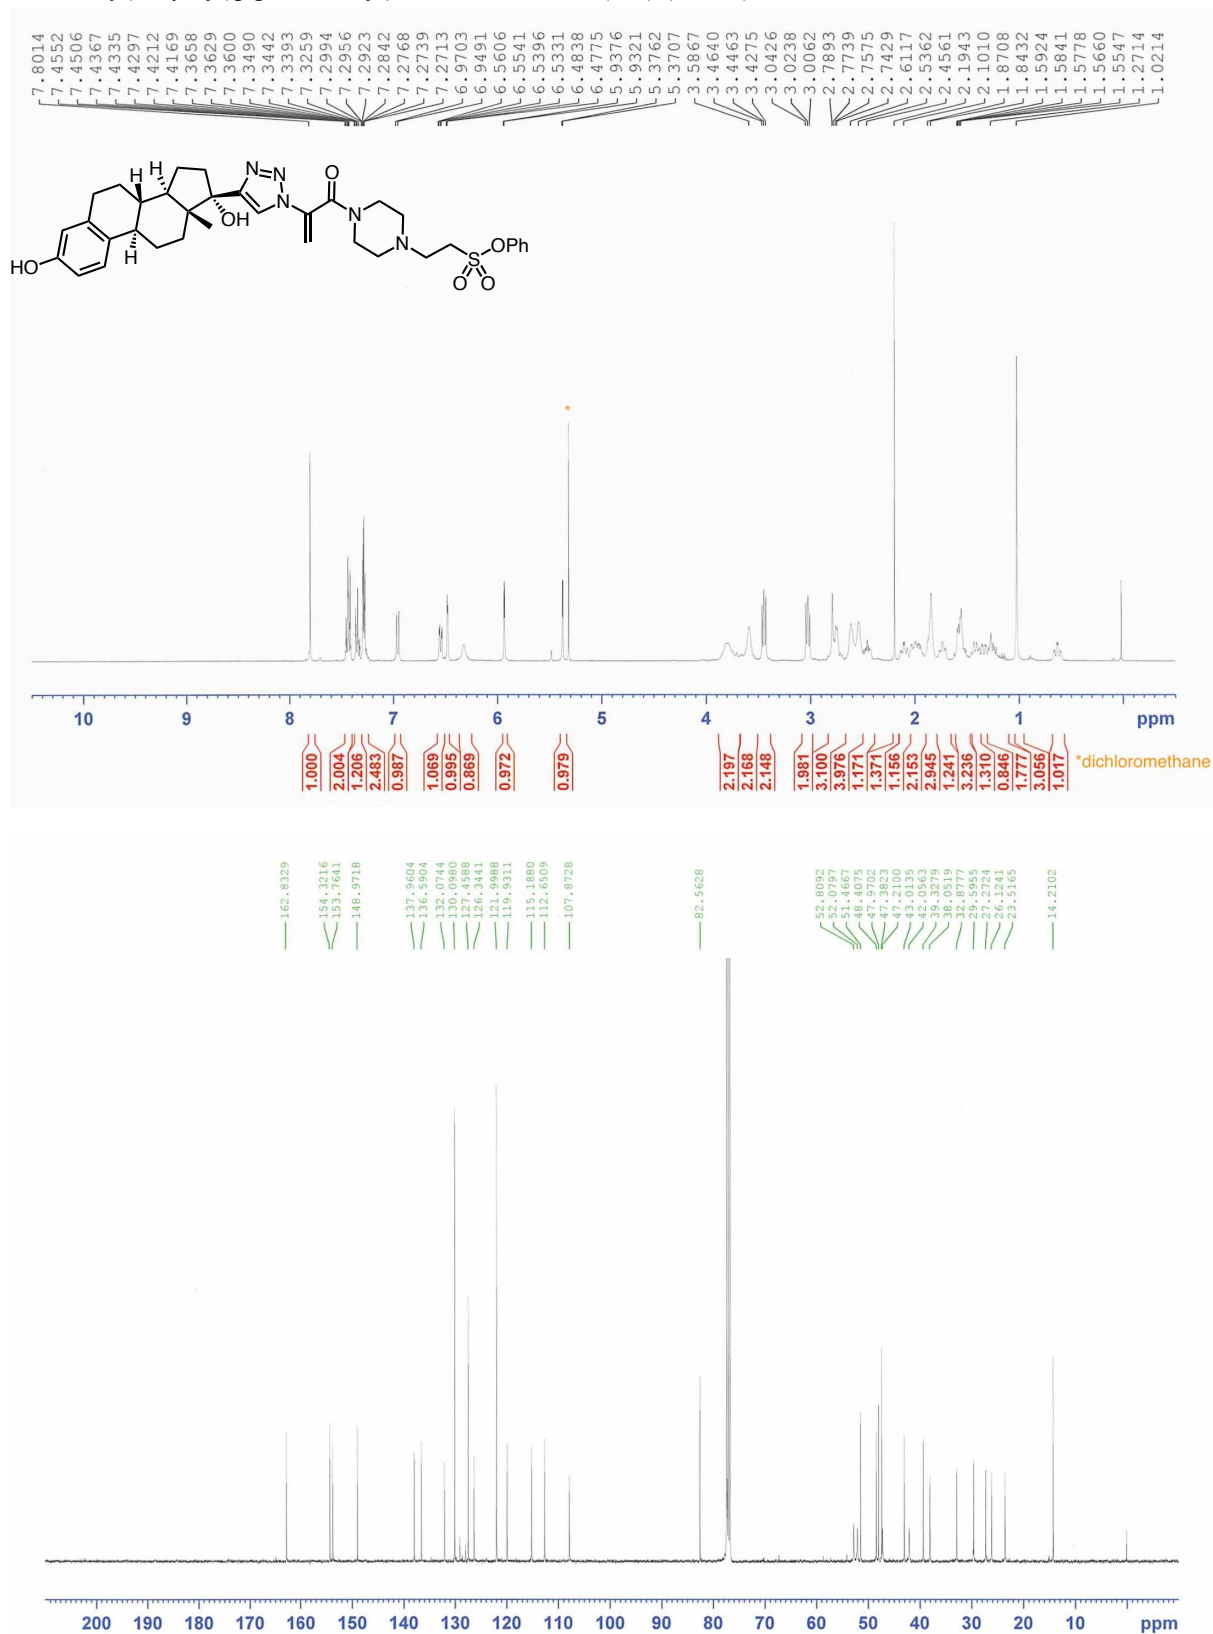

$^1\text{H}$  NMR (400 MHz) and  $^{13}\text{C}$  NMR (101 MHz) spectra of phenyl 2-(4-(2-(4-(4-(*tert*-butyldimethylsilyloxy)phenyl)-1*H*-1,2,3-triazol-1-yl)-3-(dodecylthio)propanoyl)piperazin-1-yl)ethane-1-sulfonate (**S3**) ( $\text{CDCl}_3$ )

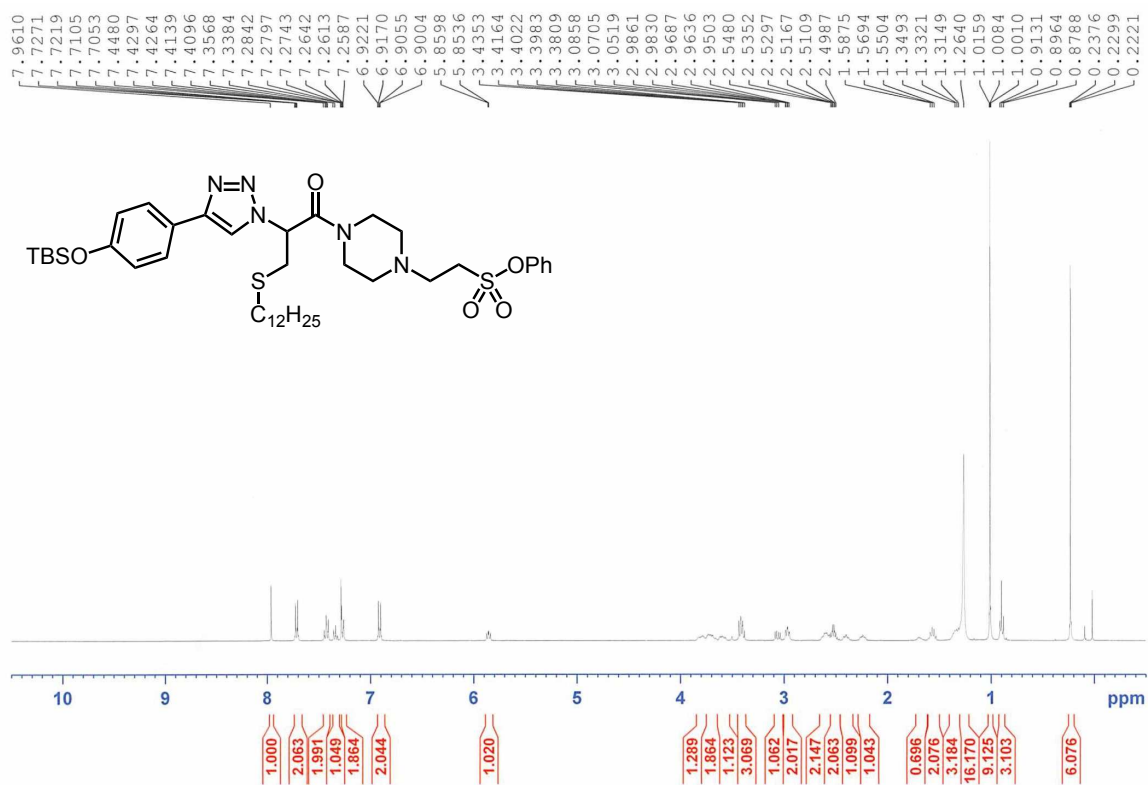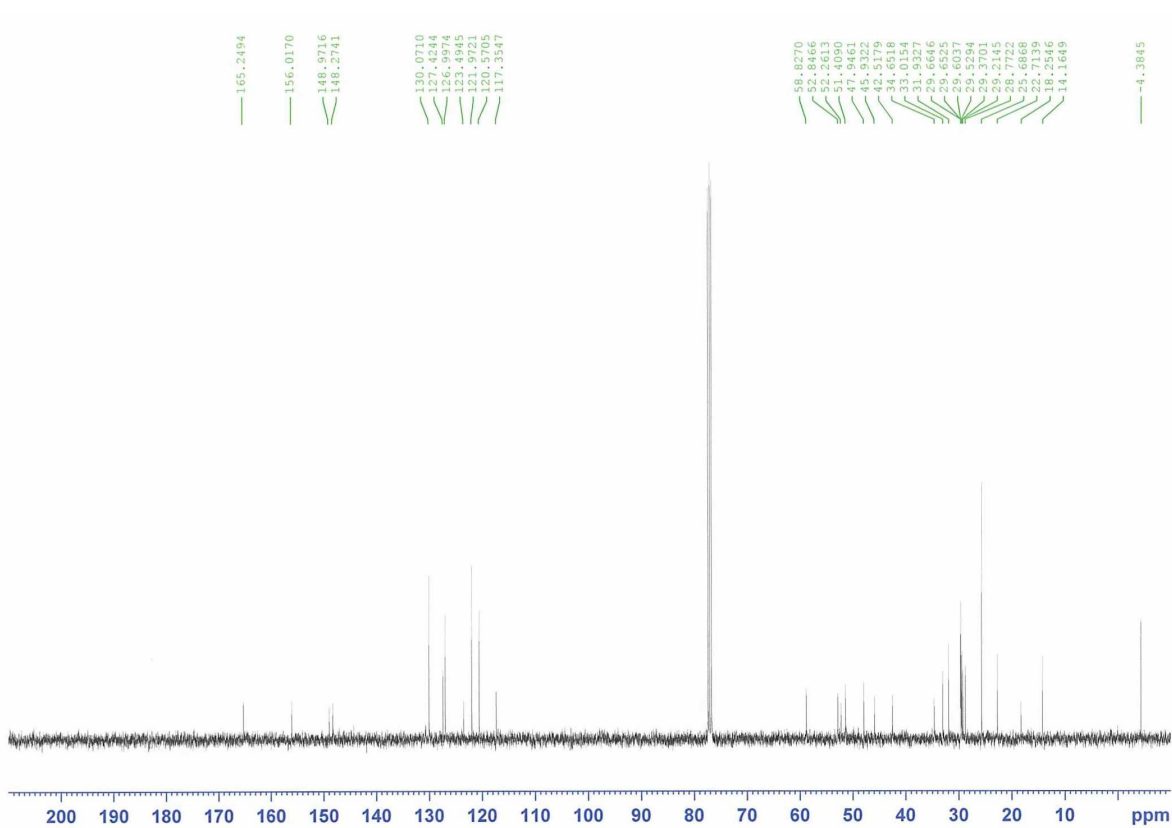





$^1\text{H}$  NMR (400 MHz) and  $^{13}\text{C}$  NMR (101 MHz) spectra of 2-(4-(3-(dodecylthio)-2-(4-(*p*-tolyl)-1*H*-1,2,3-triazol-1-yl)propanoyl)piperazin-1-yl)ethane-1-sulfonyl fluoride (**S7**) ( $\text{CDCl}_3$ )

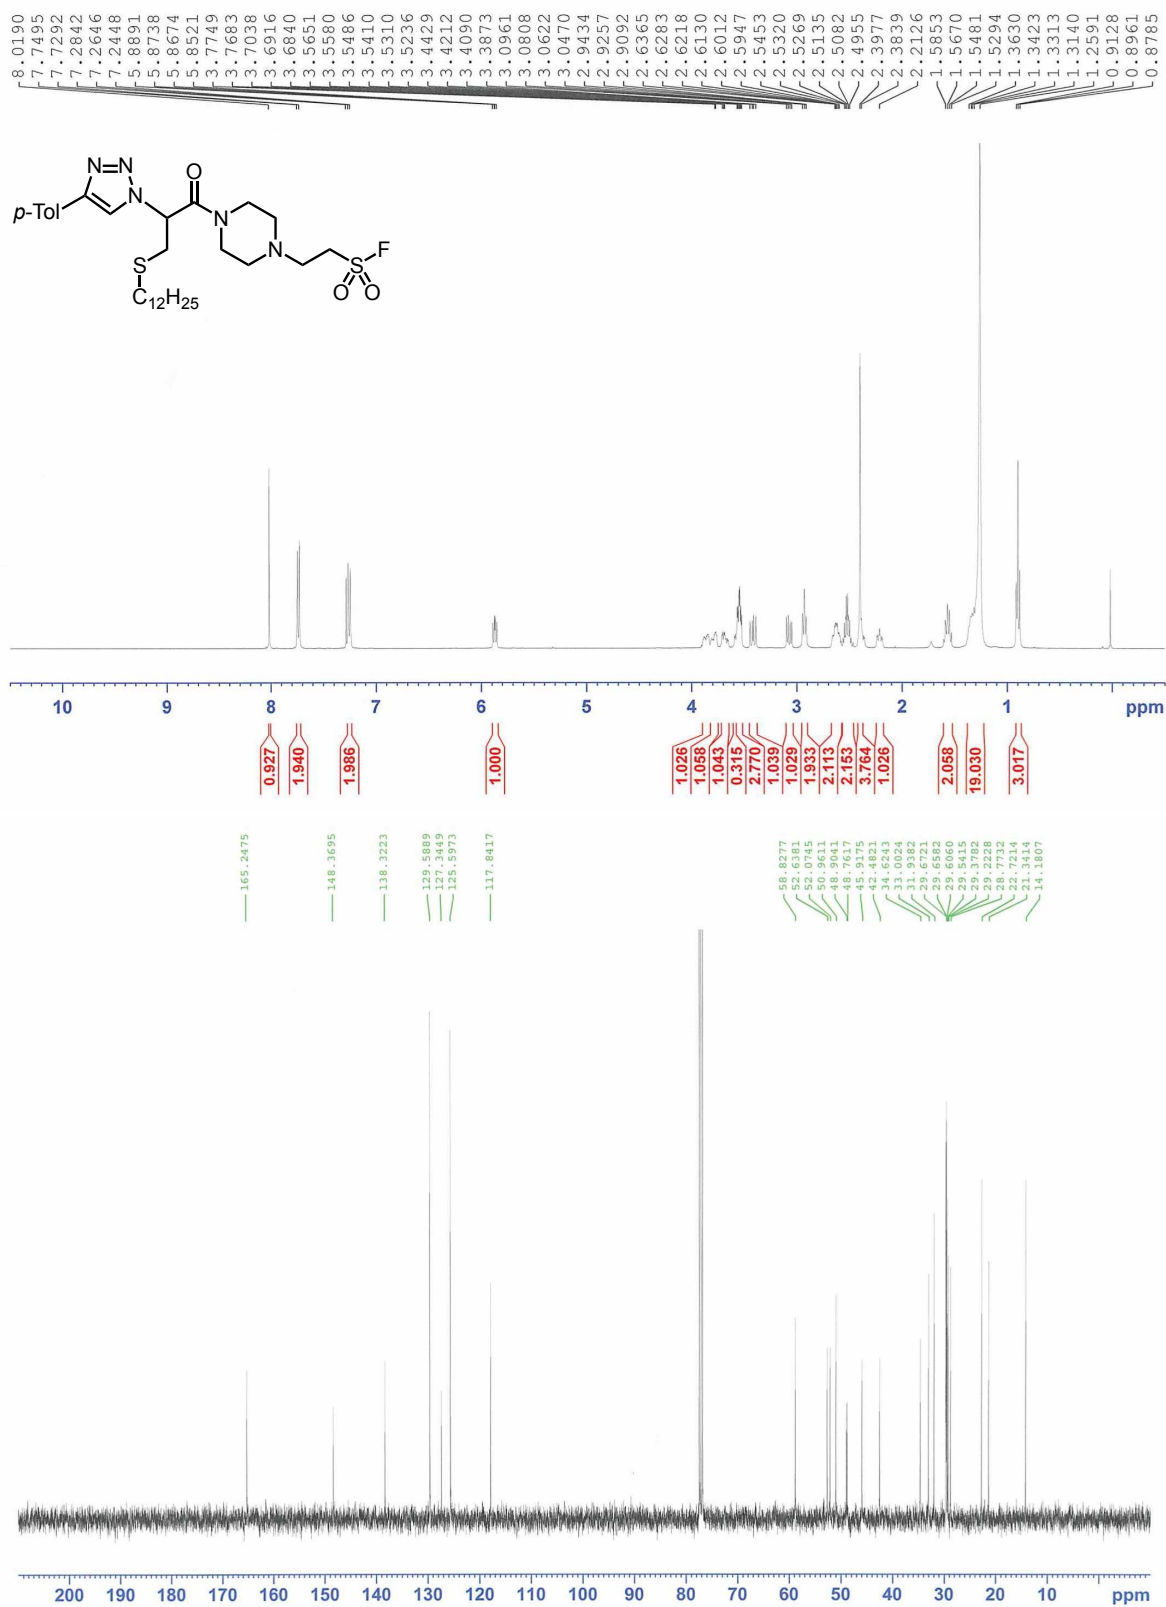

<sup>1</sup>H NMR (400 MHz) and <sup>13</sup>C NMR (101 MHz) spectra of 4-ethynylphenyl 2-(4-(3-(dodecylthio)-2-(4-(*p*-tolyl)-1*H*-1,2,3-triazol-1-yl)propanoyl)piperazin-1-yl)ethane-1-sulfonate (**S8**) (CDCl<sub>3</sub>)

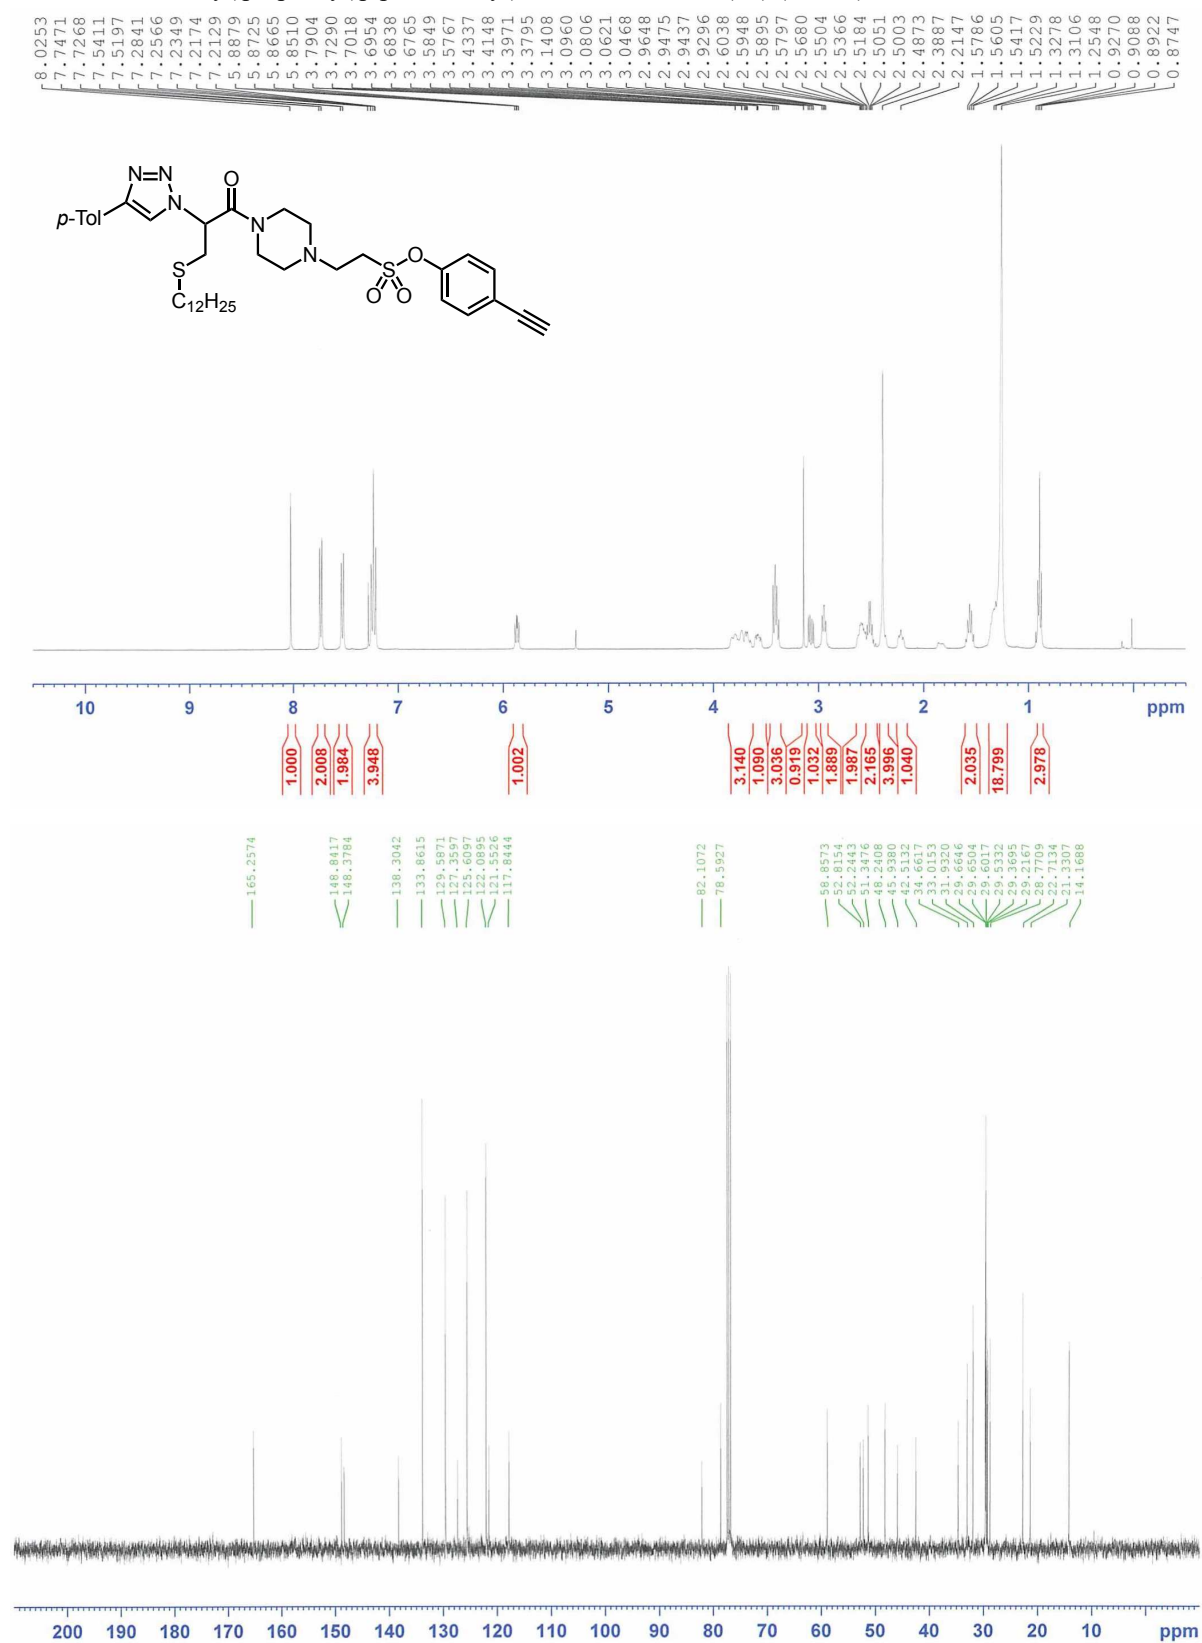

$^1\text{H}$  NMR (400 MHz) and  $^{13}\text{C}$  NMR (101 MHz) spectra of 4-(1-(3-(4-(2-(fluorosulfonyl)ethyl)piperazin-1-yl)-3-oxoprop-1-en-2-yl)-1*H*-1,2,3-triazol-4-yl)phenyl 2-(4-(3-(dodecylthio)-2-(4-(*p*-tolyl)-1*H*-1,2,3-triazol-1-yl)propanoyl)piperazin-1-yl)ethane-1-sulfonate (**15**) ( $\text{CDCl}_3$ )

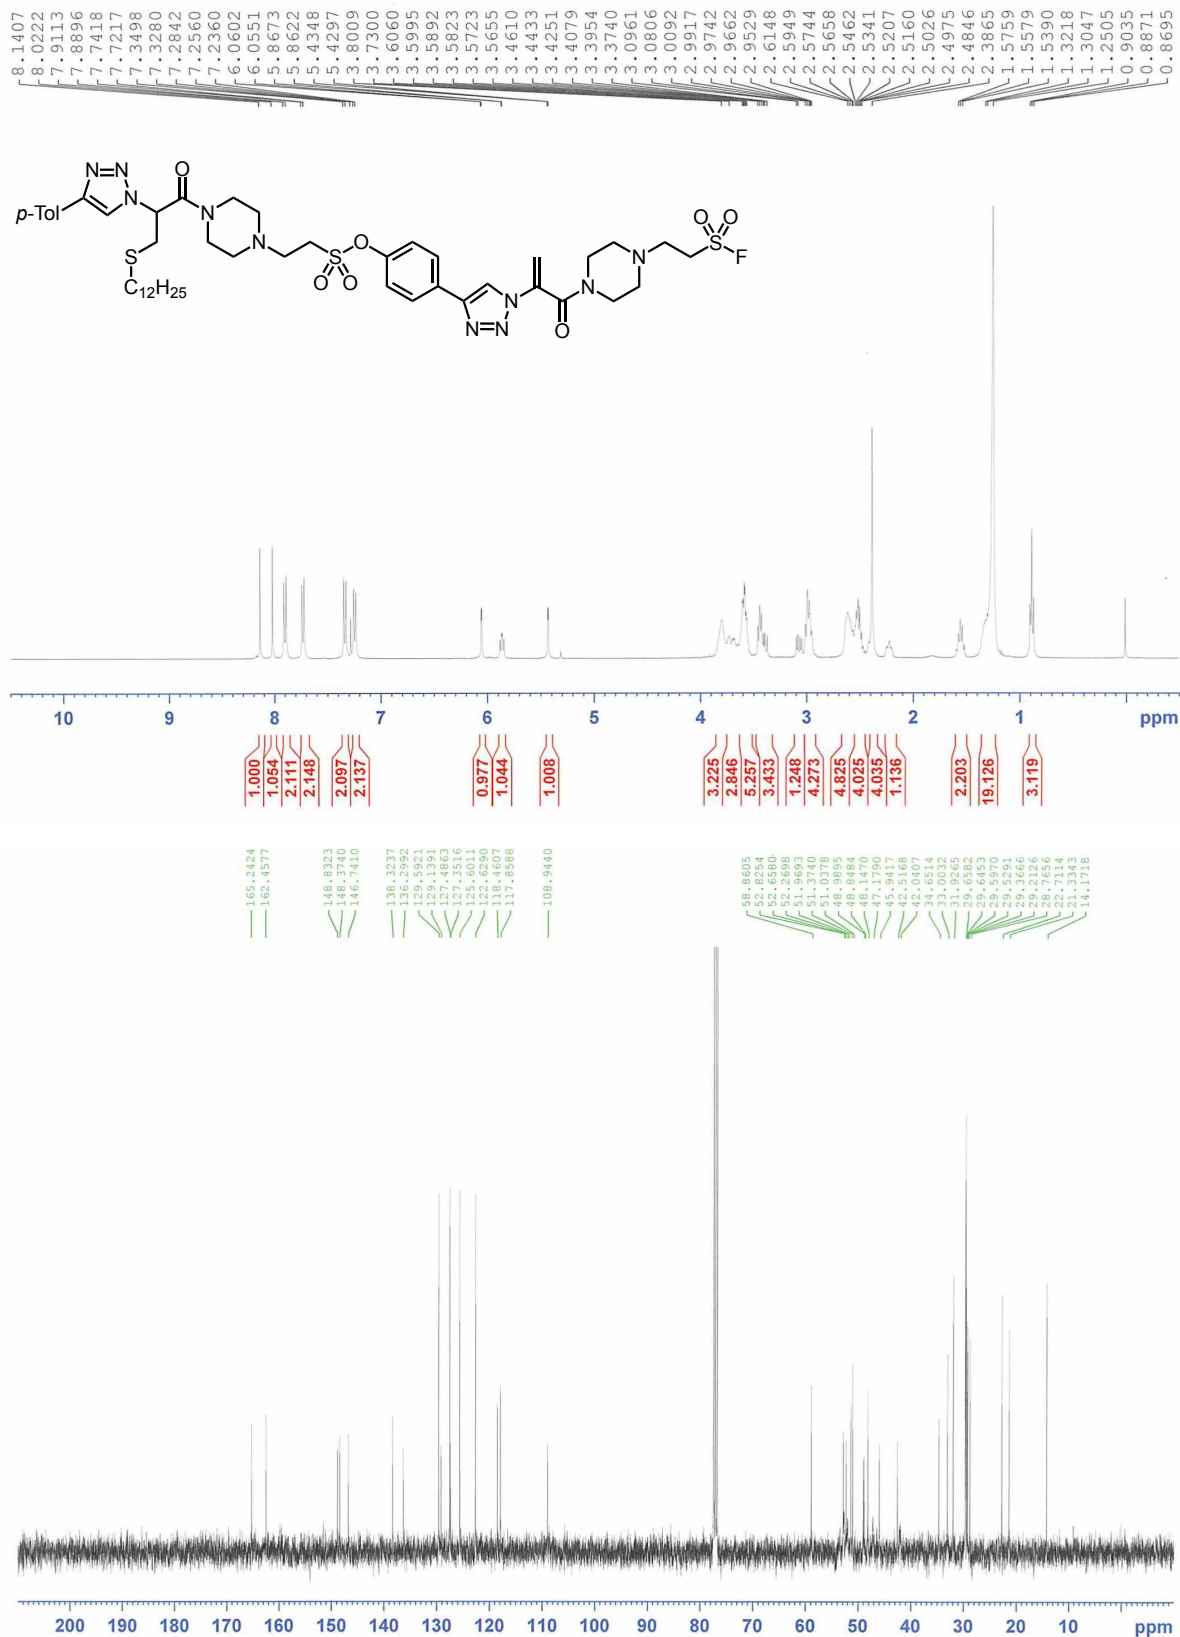

<sup>1</sup>H NMR (400 MHz) and <sup>13</sup>C NMR (101 MHz) spectra of 4-(1-(3-(dodecylthio)-1-oxo-1-(4-(2-(phenoxysulfonyl)ethyl)piperazin-1-yl)propan-2-yl)-1H-1,2,3-triazol-4-yl)phenyl 2-(4-(2-(4-(4-(tert-butyl)dimethylsilyl)oxy)phenyl)-1H-1,2,3-triazol-1-yl)acryloyl)piperazin-1-yl)ethane-1-sulfonate (**S1**) (CDCl<sub>3</sub>)

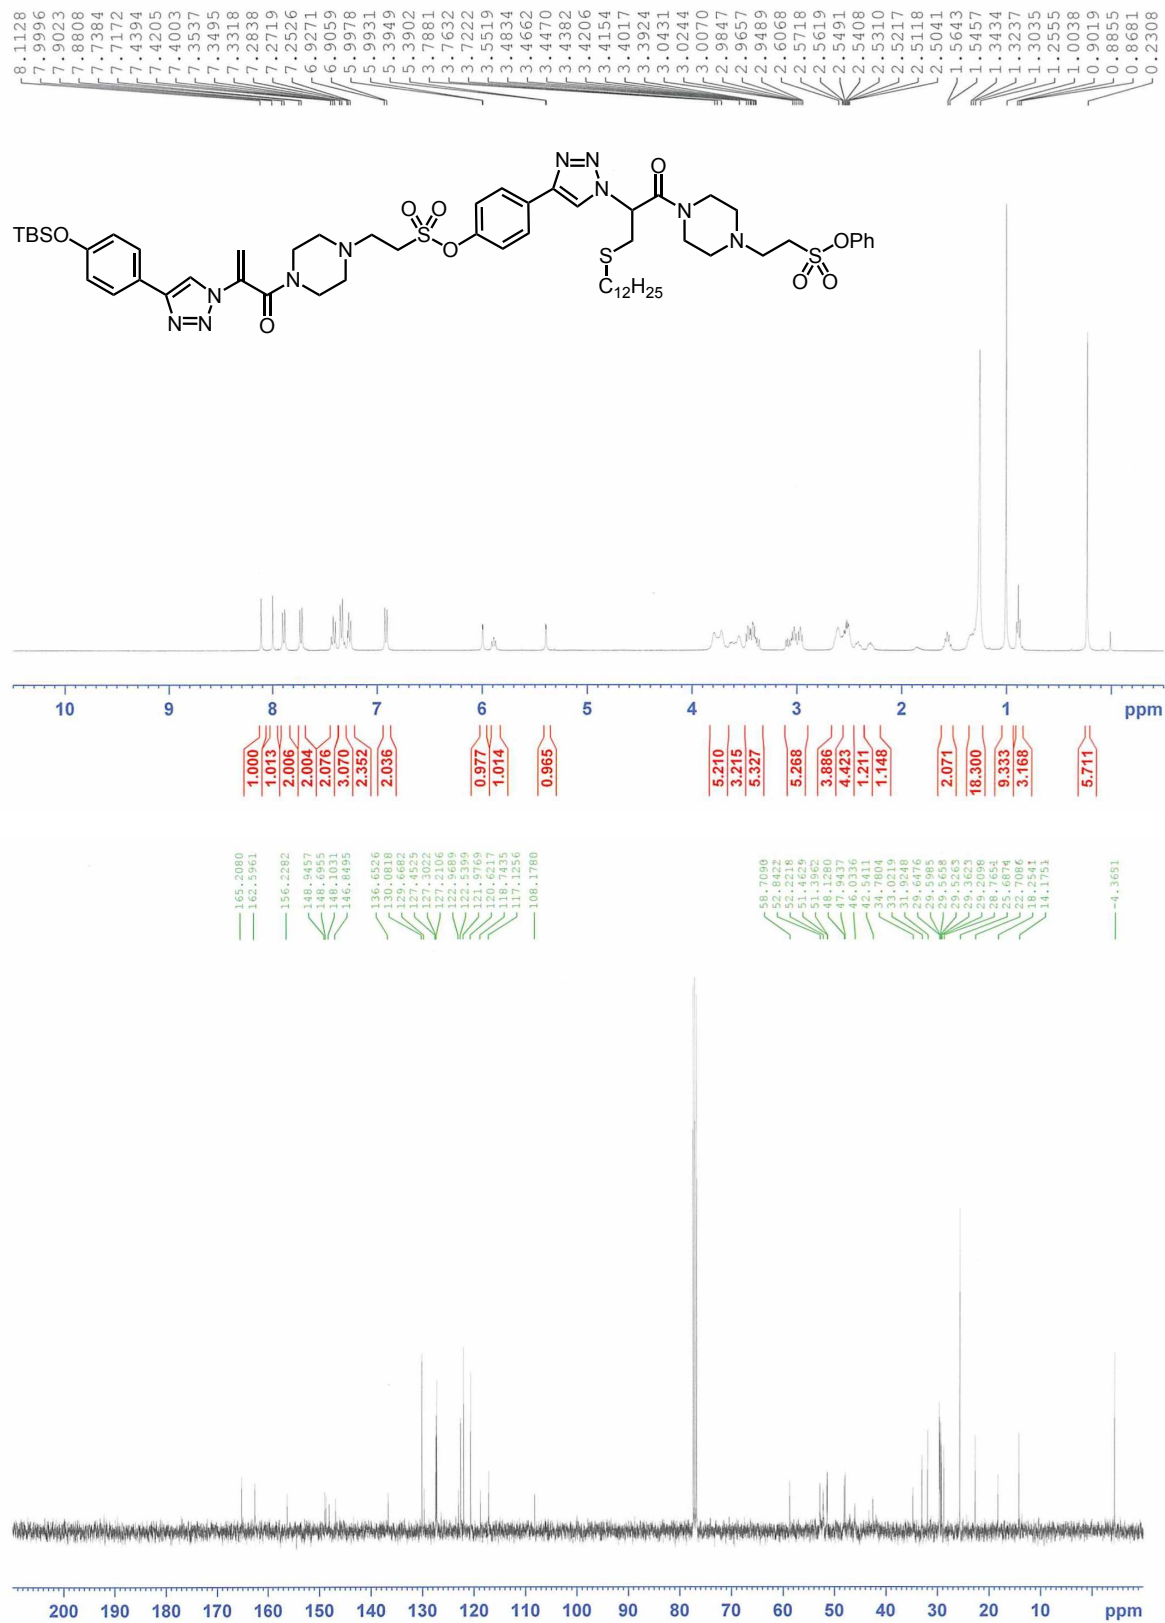

<sup>1</sup>H NMR (400 MHz) and <sup>13</sup>C NMR (101 MHz) spectra of 4-(1-(3-(Dodecylthio)-1-oxo-1-(4-(2-(phenoxysulfonyl)ethyl)piperazin-1-yl)propan-2-yl)-1H-1,2,3-triazol-4-yl)phenyl 2-(4-(2-(4-(4-(tert-butyl)dimethylsilyl)oxy)phenyl)-1H-1,2,3-triazol-1-yl)-3-(phenethylthio)propanoyl)piperazin-1-yl)ethane-1-sulfonate (**S4**) (CDCl<sub>3</sub>)

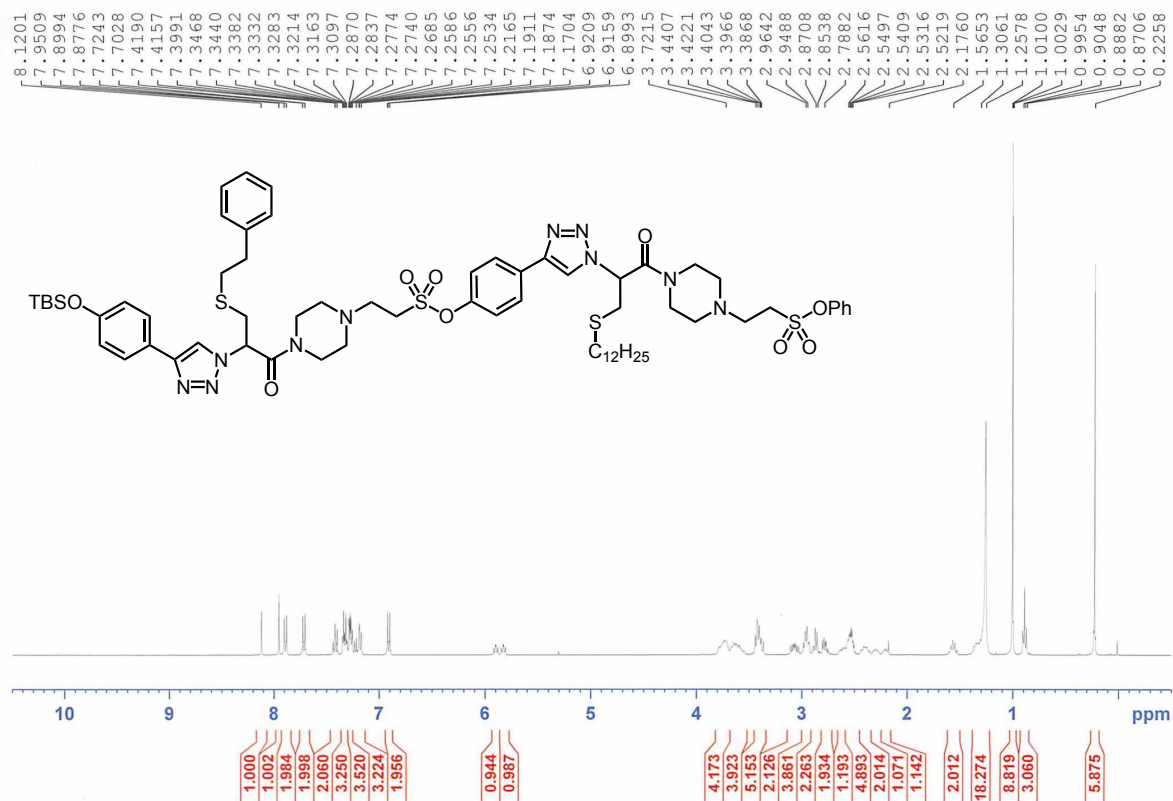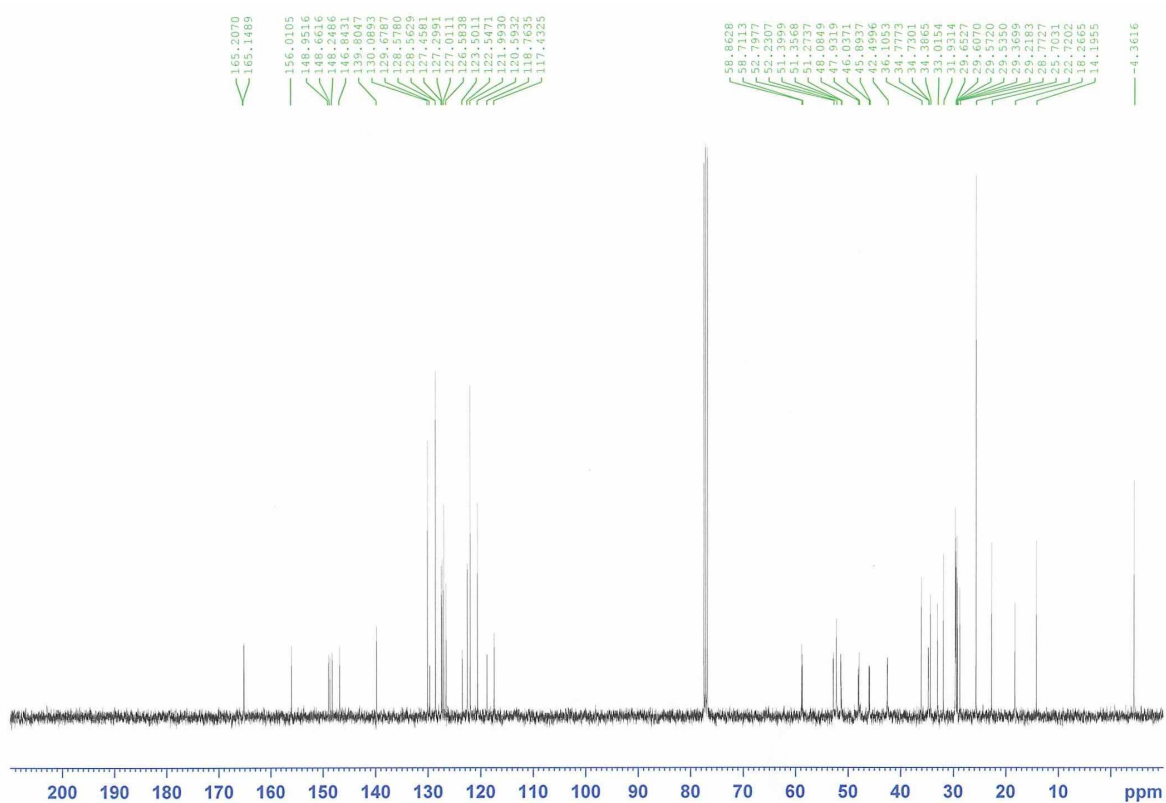

<sup>1</sup>H NMR (400 MHz) and <sup>13</sup>C NMR (101 MHz) spectra of 4-(1-(1-(4-(2-((4-(1-(3-(dodecylthio)-1-oxo-1-(4-(2-(phenoxy sulfonyl)ethyl)piperazin-1-yl)propan-2-yl)-1H-1,2,3-triazol-4-yl)phenoxy)sulfonyl)ethyl)piperazin-1-yl)-1-oxo-3-(phenethylthio)propan-2-yl)-1H-1,2,3-triazol-4-yl)phenyl 2-(4-(2-azidoacryloyl)piperazin-1-yl)ethane-1-sulfonate (**S5**) (CDCl<sub>3</sub>)

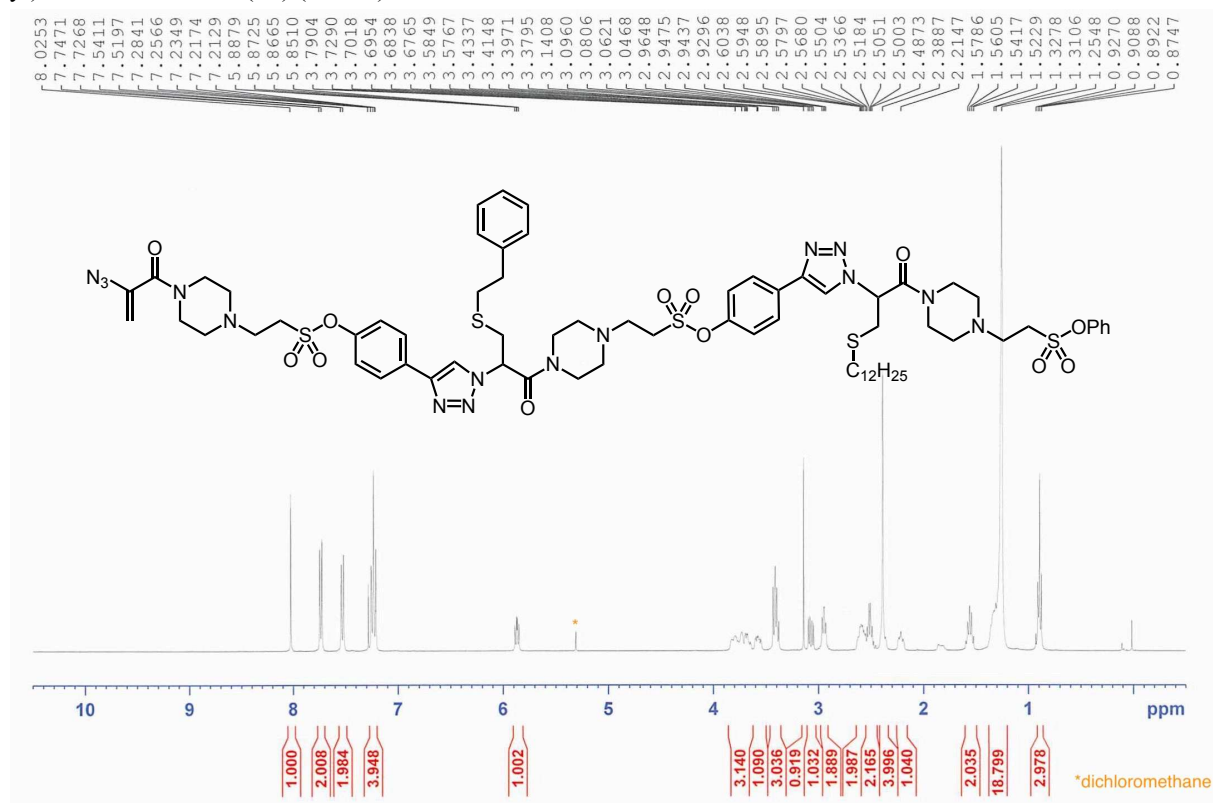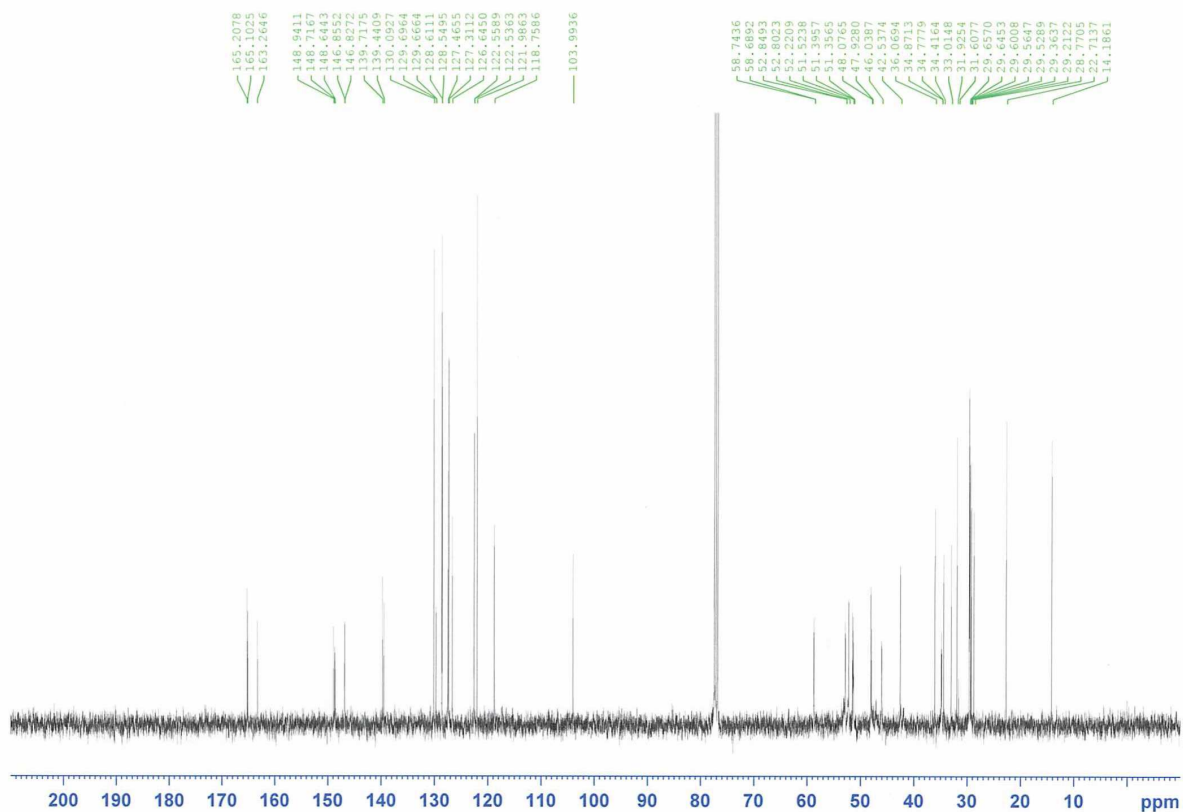

<sup>1</sup>H NMR (400 MHz) and <sup>13</sup>C NMR (101 MHz) spectra of 4-(1-(1-(4-(2-((4-(1-(3-(dodecylthio)-1-oxo-1-(4-(2-(phenoxysulfonyl)ethyl)piperazin-1-yl)propan-2-yl)-1H-1,2,3-triazol-4-yl)phenoxy)sulfonyl)ethyl)piperazin-1-yl)-1-oxo-3-(phenethylthio)propan-2-yl)-1H-1,2,3-triazol-4-yl)phenyl 2-(4-(2-(4-(4-((tert-butyl)dimethylsilyl)oxy)phenyl)-1H-1,2,3-triazol-1-yl)acryloyl)piperazin-1-yl)ethane-1-sulfonate (**S2**) (CDCl<sub>3</sub>)

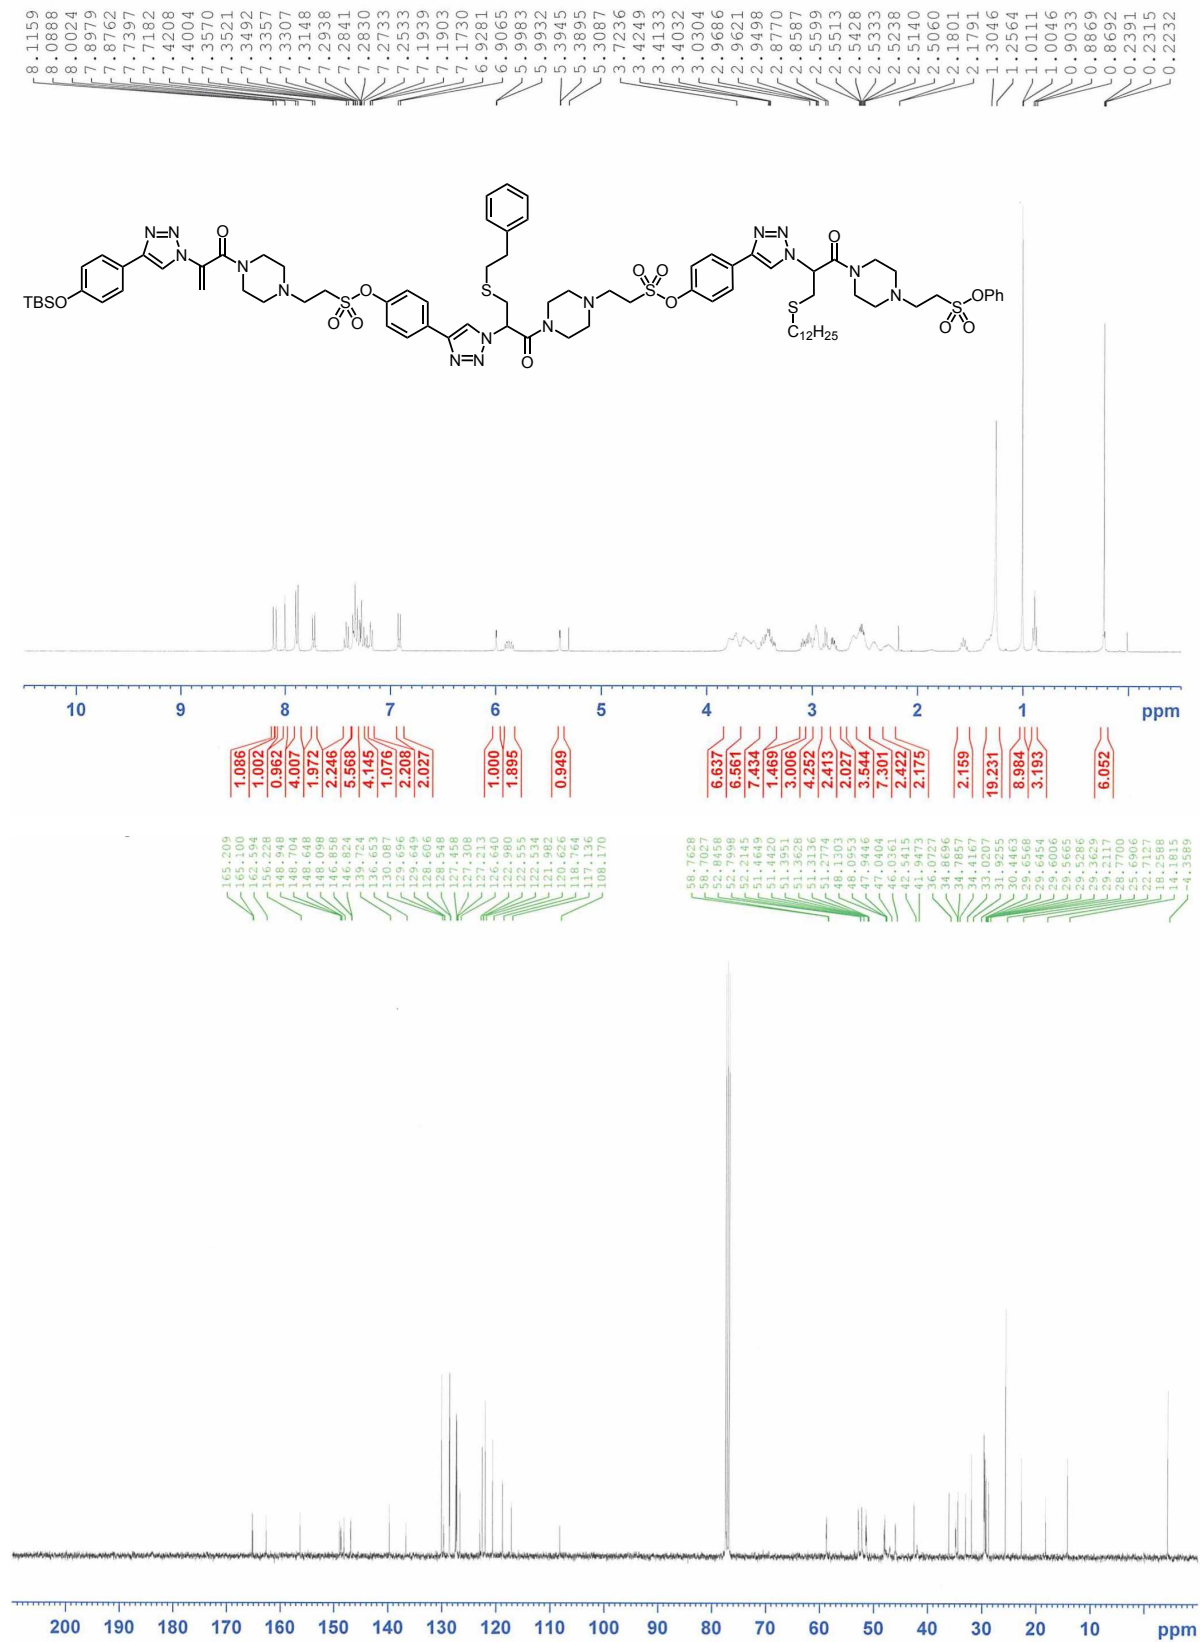

<sup>1</sup>H NMR (400 MHz) and <sup>13</sup>C NMR (101 MHz) spectra of 4-(1-(4-(2-((4-(1-(3-(dodecylthio)-1-oxo-1-(4-(2-(phenoxy sulfonyl)ethyl)piperazin-1-yl)propan-2-yl)-1*H*-1,2,3-triazol-4-yl)phenoxy)sulfonyl)ethyl)piperazin-1-yl)-1-oxo-3-(phenethylthio)propan-2-yl)-1*H*-1,2,3-triazol-4-yl)phenyl 2-(4-(3-(butylamino)-2-(4-(4-((*tert*-butyldimethylsilyl)oxy)phenyl)-1*H*-1,2,3-triazol-1-yl)propanoyl)piperazin-1-yl)ethane-1-sulfonate (**16**) (CDCl<sub>3</sub>)

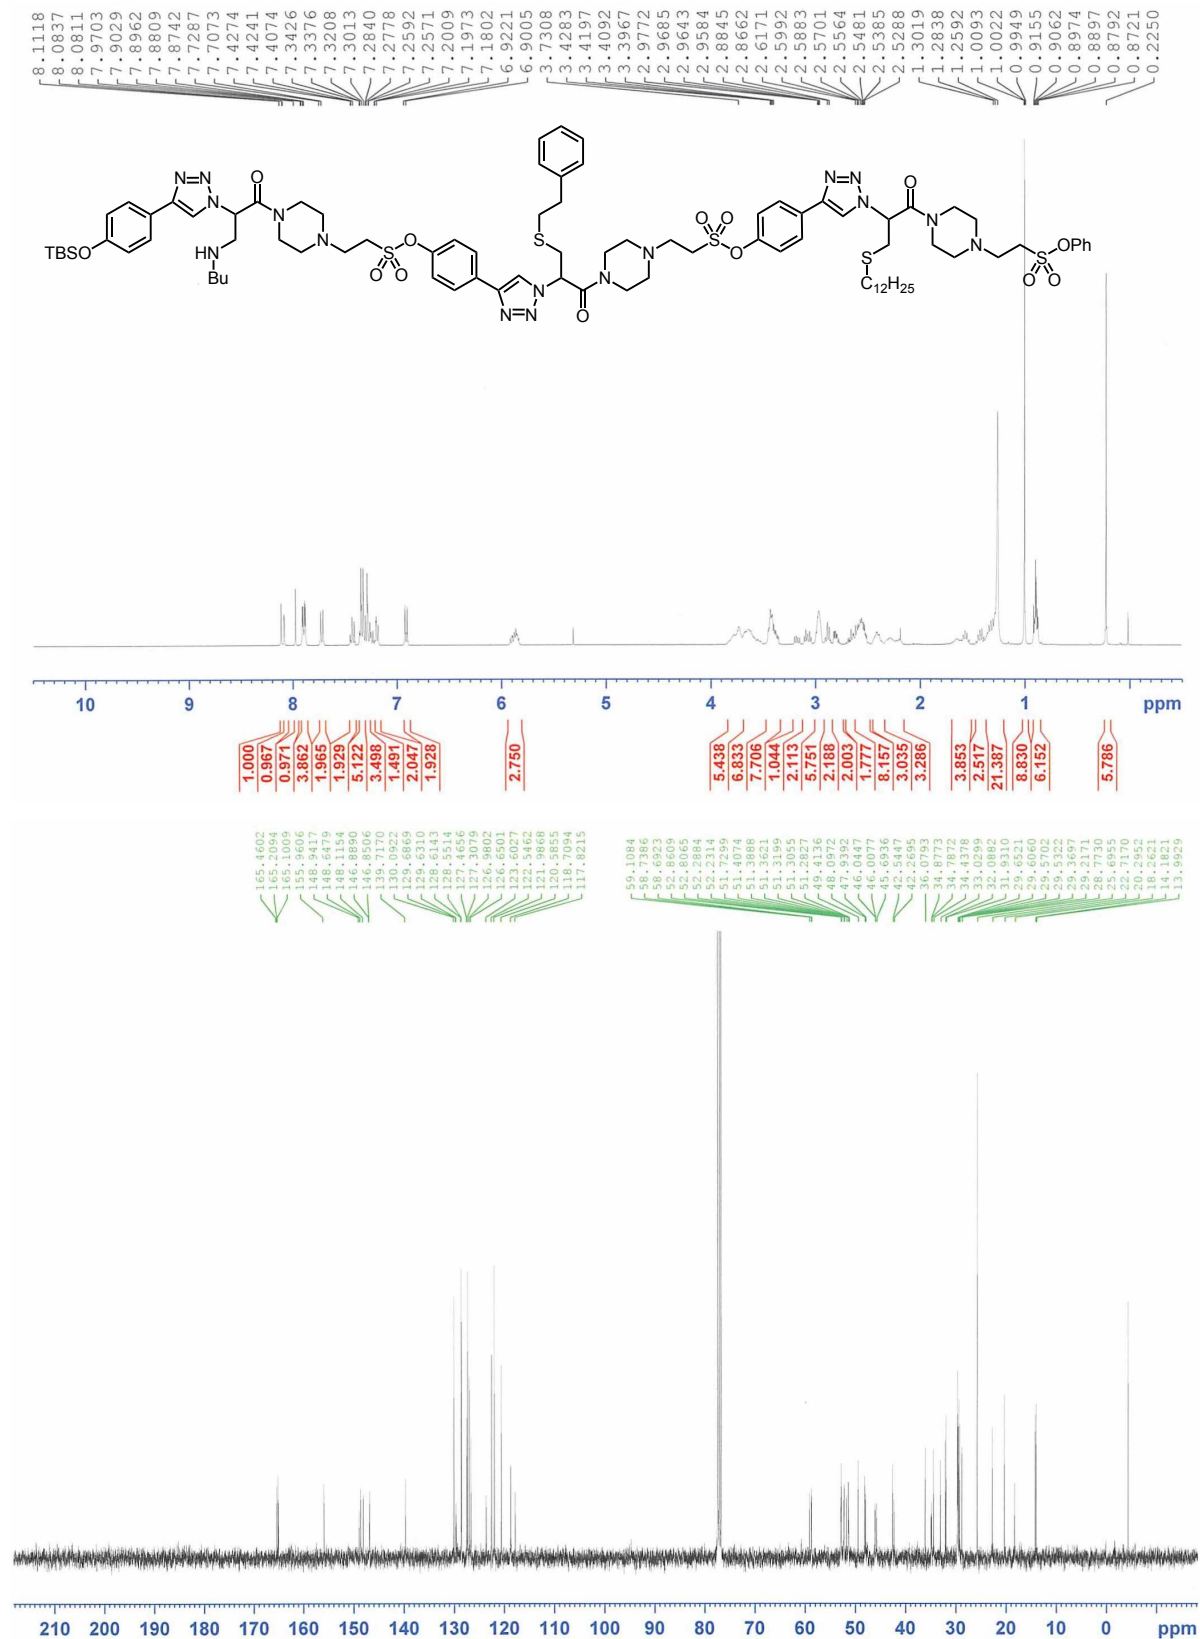



$^1\text{H}$  NMR (400 MHz) and  $^{13}\text{C}$  NMR (101 MHz) spectra of 1-(3-azido-5-iodophenyl)-*N*-methylmethanamine ( $\text{CDCl}_3$ )

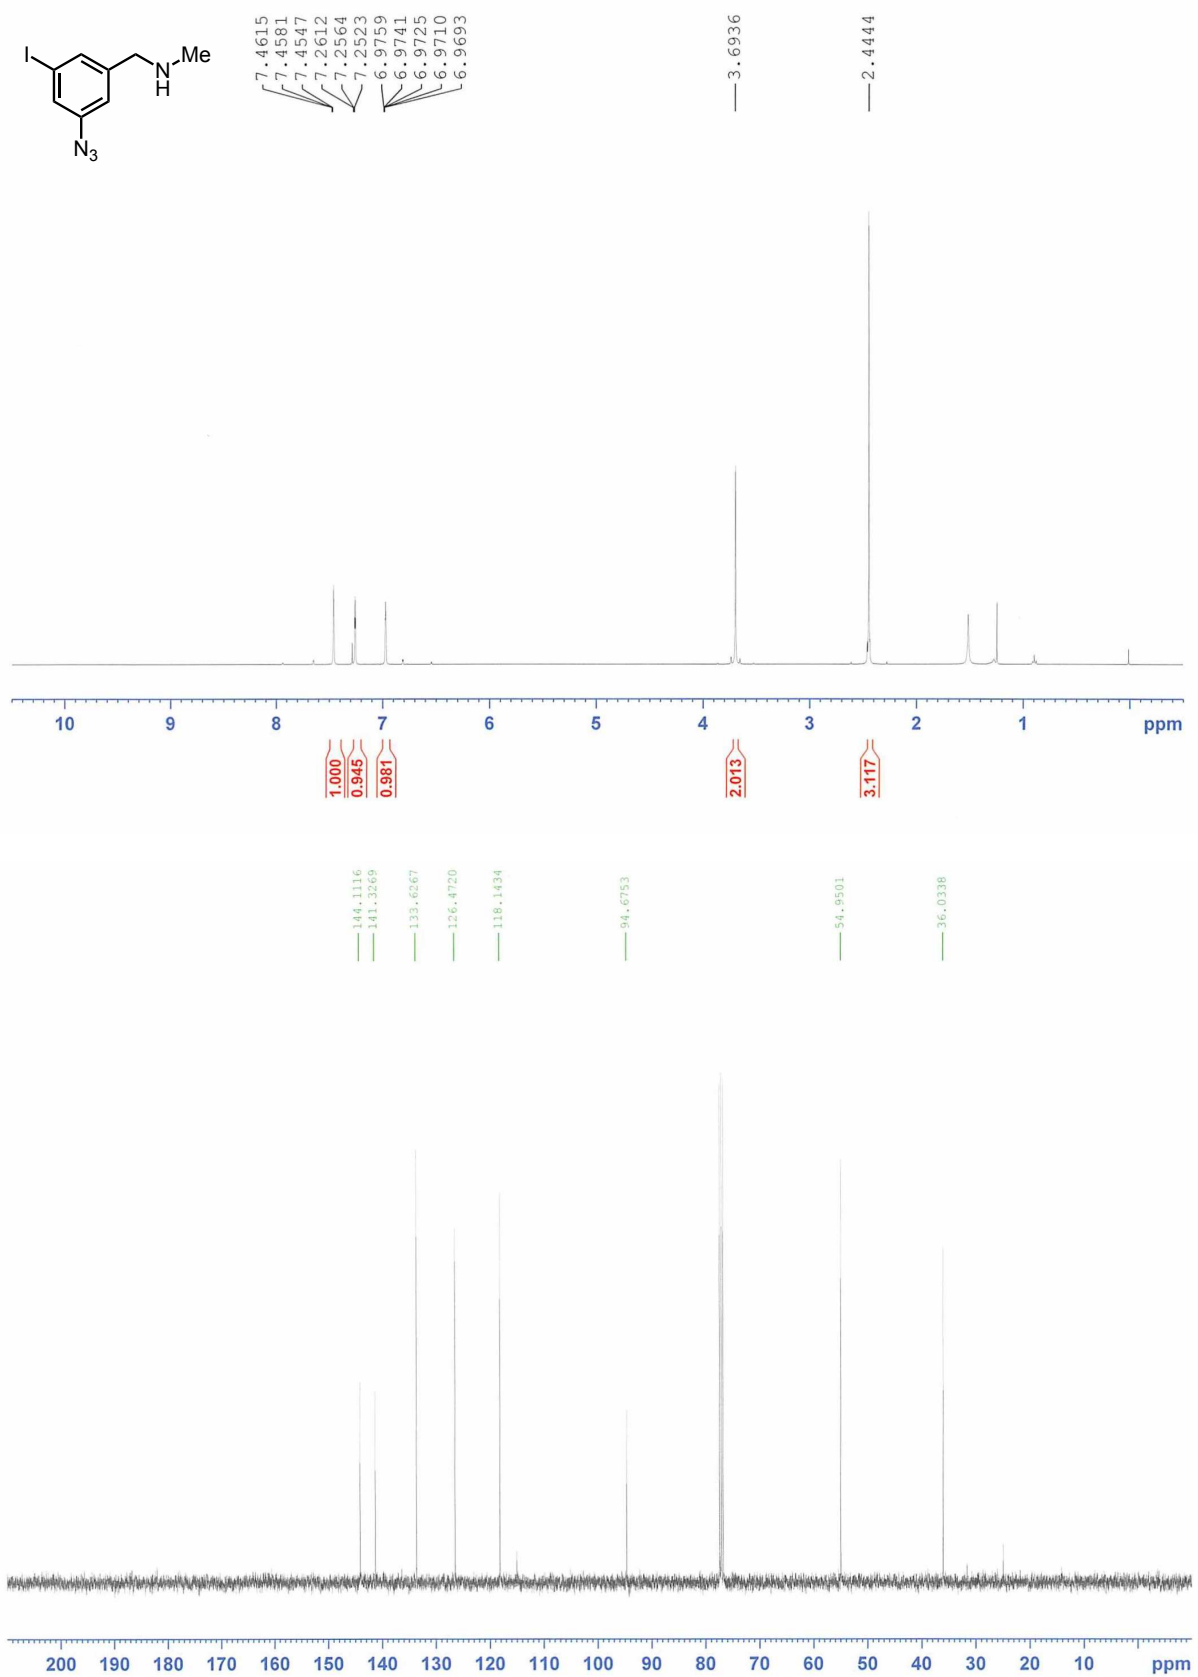

$^1\text{H}$  NMR (400 MHz) and  $^{13}\text{C}$  NMR (101 MHz) spectra of *tert*-butyl (3-azido-5-iodobenzyl)(methyl)carbamate ( $\text{CDCl}_3$ )

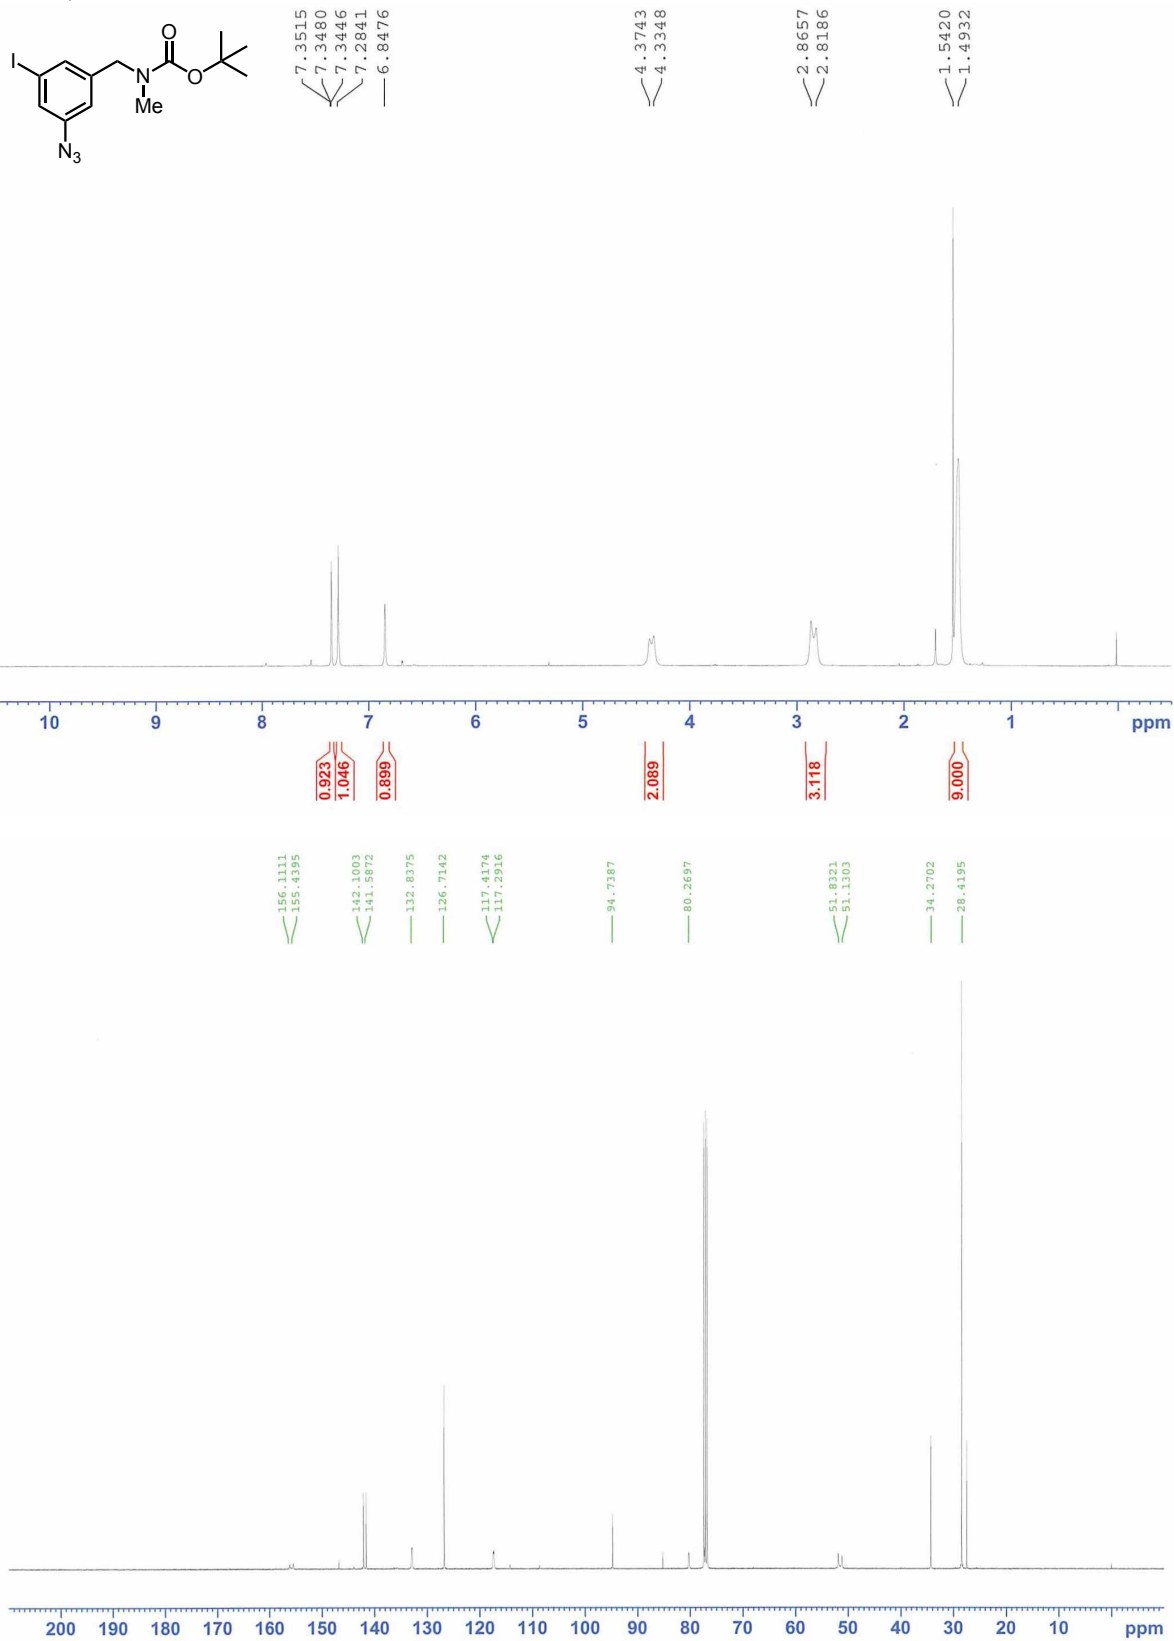

$^1\text{H}$  NMR (400 MHz) and  $^{13}\text{C}$  NMR (101 MHz) spectra of *tert*-butyl (3-amino-5-iodobenzyl)(methyl)carbamate ( $\text{CDCl}_3$ )

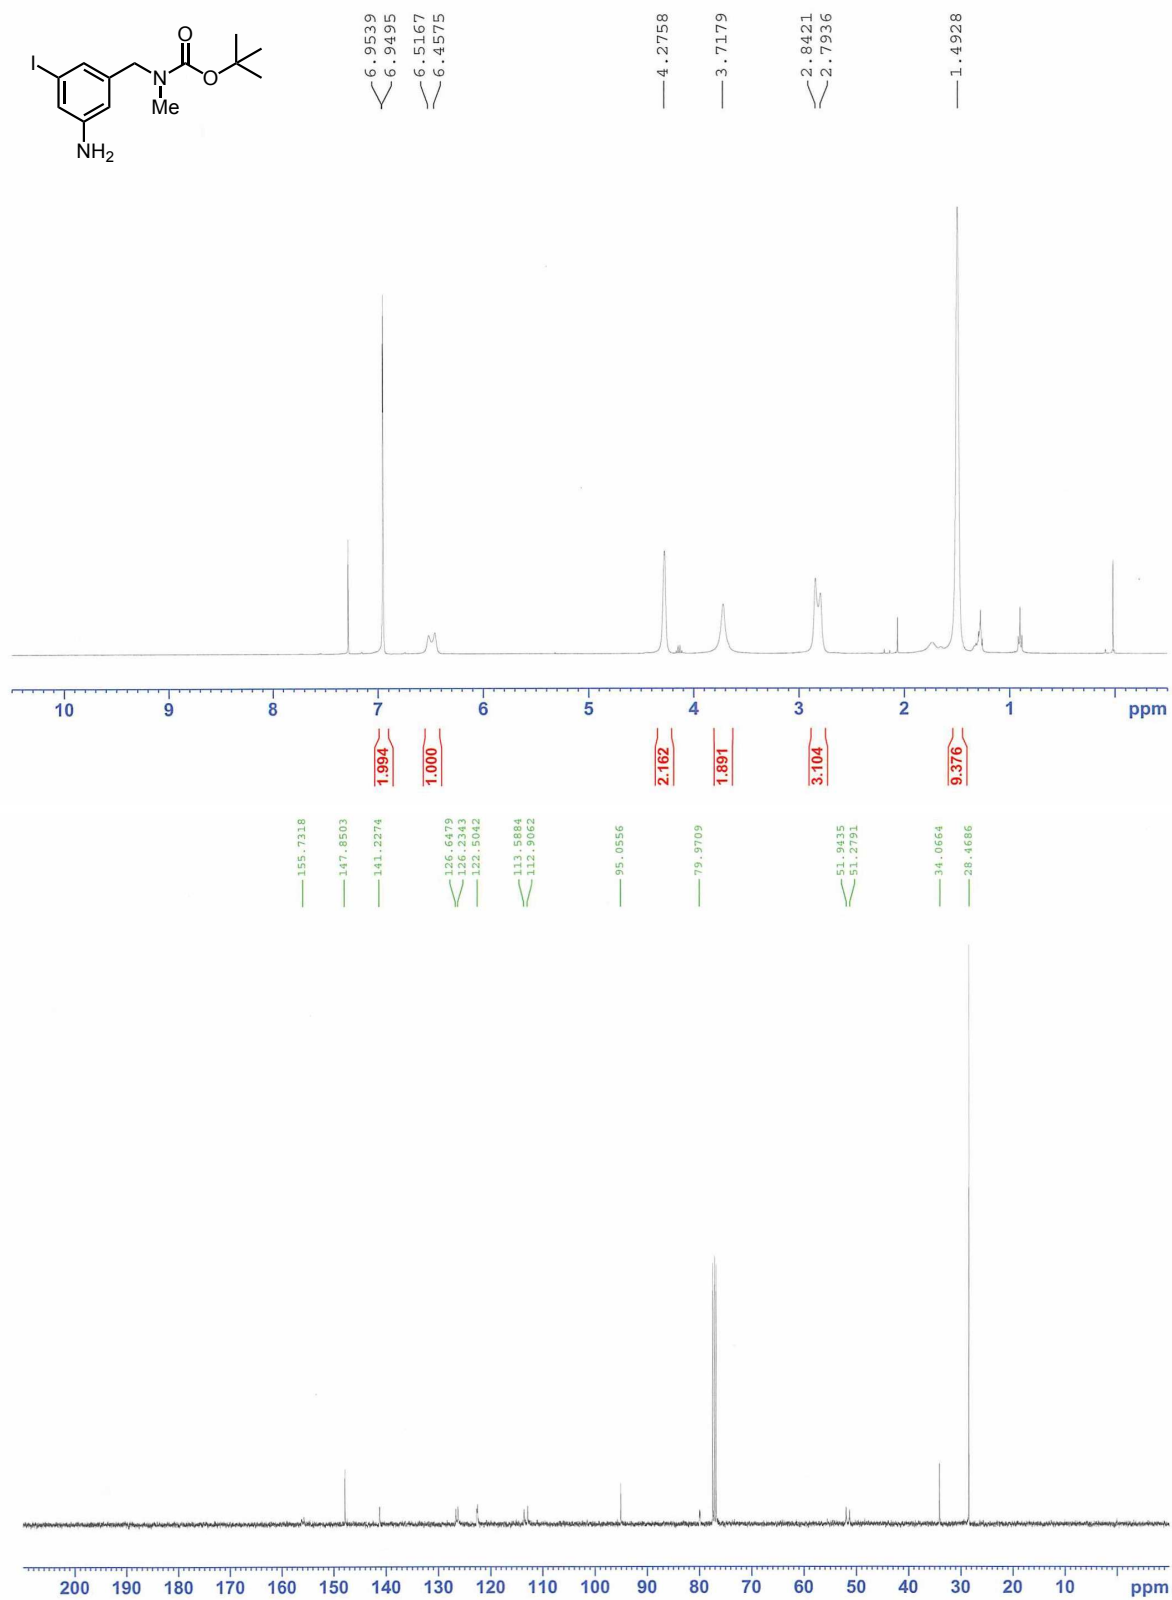

Supplement: d4cc01177e1.pdf [file d4cc01177e1.pdf]
